# Supplementary material for: Rapid adaptation of endocytosis, exocytosis, and eisosomes after an acute increase in membrane tension in yeast cells
Source: eLife. 2021 May 13;10:e62084. doi: 10.7554/eLife.62084 (PMC9045820; doi:10.7554/eLife.62084)
Supplement: Figure 1—source data 1. [file elife-62084-fig1-data1.xlsx]

## Sheet: Eisosome density and cell vol
		Sorbitol concentration (M)	Eisosome density (AU/um^2)		Volume (um^3)
			Mean	STD	Mean	STD	N Cells
Protoplast	WT	0.25	21.0796	5.88364	134.432	41.1624	26
Protoplast	WT	0.4	28.7718	8.82576	94.9893	28.8663	34
Protoplast	WT	1.2	41.387	12.2206	75.5803	21.1652	39

## Sheet: ANOVA (eisosome density)
One -way ANOVA
Significance level	α =	0.05
	mean	stdev	N
0.25 M	21.0796	5.88364	26
0.4 M	28.7718	8.82576	34
1.2 M	41.387	12.2206	39
						ANOVA between 0.25 M and 0.4 M	ANOVA between 0.4 M and 1.2 M	ANOVA between0.25 M and 1.2 M
Overall mean	m=	31.7212				25.4385	35.5114	33.264
Between-group degrees of freedom	dfb=	2				1	1	1
Between-group mean square value	MSb=	3441.87				871.754	2890.74	6433.25
Within-group degrees of freedom	dfw=	96				58	71	63
Within-group mean square value	MSw=	94.9057				59.2402	116.134	103.817
F-ratio	F=	36.2662				14.7156	24.8914	61.9674
Critical value	Fcrit=	3.09119				4.00687	3.97581	3.99336
p-value	p=	1.85441e-12				0.000310811	4.15467e-06	5.97637e-11
The difference between all conditions is statistically significant						The difference between 0.25M and 0.4 M is statistically significant	The difference between 0.4 M and 1.2 M is statistically significant	The difference between 0.25 M and 1.2 M is statistically significant
