# Supplementary material for: Rapid adaptation of endocytosis, exocytosis, and eisosomes after an acute increase in membrane tension in yeast cells
Source: eLife. 2021 May 13;10:e62084. doi: 10.7554/eLife.62084 (PMC9045820; doi:10.7554/eLife.62084)
Supplement: Figure 1—source data 2. [file elife-62084-fig1-data2.xlsx]

## Sheet: Sheet1
Pil1p-mEGFP intensity
All data				Summary
Walled cell	Protoplast			Walled cell				Protoplast
6781.31	5545.28			Mean	SEM	N		Mean	SEM	N
5609.43	4157.74			5615.39	346.097	32		5545.92	608.225	19
5660.01	3808.47
5635.41	10179.3
4139.3	5988.09
4874.69	2117.06
5366.71	8758.97
5406.56	8214.13
7652.37	2349.46
6605.59	3959.79
5900.85	4969.29
5269.69	8199.21
5876.5	3724.22
5950.69	2970.48
11727.9	5545.28
11128.9	4157.74
3542.93	10179.3
2493.12	2349.46
5387.69	8199.21
7978.96
4341.56
3697.11
4256.89
4776.28
3643.96
4681.37
2948.8
6781.31
5660.01
5635.41
4874.69
5406.56
