# Supplementary material for: Rapid adaptation of endocytosis, exocytosis, and eisosomes after an acute increase in membrane tension in yeast cells
Source: eLife. 2021 May 13;10:e62084. doi: 10.7554/eLife.62084 (PMC9045820; doi:10.7554/eLife.62084)
Supplement: Figure 1—source data 3. [file elife-62084-fig1-data3.xlsx]

## Sheet: Sheet1
Protoplasts
Membrane tension (mN/m)
	WT				pil1Δ
	Mean	SD	N		Mean	SD	N
Steady state in 0.8M	0.449	0.141	28		0.389	0.129	42
After ΔP=-0.2 M	0.726	0.215	5		1.743	0.61	7
