# Supplementary material for: Rapid adaptation of endocytosis, exocytosis, and eisosomes after an acute increase in membrane tension in yeast cells
Source: eLife. 2021 May 13;10:e62084. doi: 10.7554/eLife.62084 (PMC9045820; doi:10.7554/eLife.62084)
Supplement: Figure 1—source data 4. [file elife-62084-fig1-data4.xlsx]

## Sheet: Sheet1
WT
Protoplasts
Steady state in 0.4 M sorbitol for 2 minutes (before time 0 min) followed by a ΔP=-0.2 M shock
Normalized area fraction
Time	Mean	SD	CI 95% upper limit	CI 95% lower limit	N
-2	0.904545	0.0326691	0.926493	0.882598	11
-1.92	0.897273	0.0464954	0.928509	0.866037	11
-1.83	0.905455	0.0434428	0.93464	0.876269	11
-1.75	0.897273	0.0360807	0.921512	0.873033	11
-1.67	0.908182	0.032808	0.930223	0.886141	11
-1.58	0.91	0.031305	0.931031	0.888969	11
-1.5	0.917273	0.0464954	0.948509	0.886037	11
-1.42	0.908182	0.0399545	0.935024	0.88134	11
-1.33	0.92	0.0440454	0.94959	0.89041	11
-1.25	0.925455	0.0367052	0.950113	0.900796	11
-1.17	0.913636	0.0405642	0.940888	0.886385	11
-1.08	0.921818	0.0406984	0.94916	0.894477	11
-1	0.928182	0.0345885	0.951419	0.904945	11
-0.92	0.924545	0.0445788	0.954494	0.894597	11
-0.83	0.934545	0.0375136	0.959747	0.909343	11
-0.75	0.930909	0.0356243	0.954842	0.906976	11
-0.67	0.93	0.0503984	0.963858	0.896142	11
-0.58	0.939167	0.0418783	0.965775	0.912558	12
-0.5	0.941667	0.0343335	0.963481	0.919852	12
-0.42	0.949167	0.0323218	0.969703	0.92863	12
-0.33	0.9575	0.0346738	0.979531	0.935469	12
-0.25	0.9625	0.0330633	0.983507	0.941493	12
-0.17	0.963333	0.0172328	0.974283	0.952384	12
-0.08	0.965833	0.0239159	0.981029	0.950638	12
0	1	0	1	1	13
0.08	0.969231	0.0197744	0.98118	0.957281	13
0.17	0.966923	0.0205688	0.979353	0.954493	13
0.25	0.957692	0.0291987	0.975337	0.940048	13
0.33	0.946923	0.051053	0.977774	0.916072	13
0.42	0.901538	0.173534	1.0064	0.796673	13
0.5	0.897692	0.170936	1.00099	0.794397	13
0.58	0.876923	0.184363	0.988333	0.765514	13
0.67	0.869231	0.189493	0.98374	0.754721	13
0.75	0.865385	0.195176	0.983328	0.747441	13
0.83	0.850769	0.199226	0.97116	0.730378	13
0.92	0.847692	0.198165	0.967442	0.727943	13
1	0.823846	0.232219	0.964175	0.683518	13
1.08	0.810769	0.234821	0.95267	0.668868	13
1.17	0.805385	0.237684	0.949015	0.661754	13
1.25	0.796154	0.245205	0.94433	0.647978	13
1.33	0.785385	0.240992	0.931014	0.639755	13
1.42	0.787692	0.241528	0.933646	0.641738	13
1.5	0.772308	0.251401	0.924228	0.620387	13
1.58	0.768462	0.251126	0.920215	0.616708	13
1.67	0.762308	0.242527	0.908865	0.61575	13
1.75	0.748462	0.255011	0.902563	0.59436	13
1.83	0.74	0.253739	0.893333	0.586667	13
1.92	0.740769	0.253655	0.894052	0.587487	13
2	0.719231	0.239703	0.864082	0.574379	13
2.08	0.725385	0.250087	0.876511	0.574258	13
2.17	0.713846	0.245375	0.862125	0.565567	13
2.25	0.702308	0.253185	0.855306	0.54931	13
2.33	0.697692	0.249705	0.848588	0.546797	13
2.42	0.685385	0.254185	0.838987	0.531782	13
2.5	0.687692	0.256715	0.842824	0.532561	13
2.58	0.681538	0.252845	0.834331	0.528746	13
2.67	0.673077	0.24824	0.823087	0.523067	13
2.75	0.677692	0.255837	0.832293	0.523092	13
2.83	0.655385	0.251648	0.807454	0.503315	13
2.92	0.657692	0.2674	0.81928	0.496104	13
3	0.652308	0.264958	0.81242	0.492195	13
3.08	0.640769	0.264243	0.80045	0.481089	13
3.17	0.641538	0.269903	0.804639	0.478438	13
3.25	0.633846	0.262442	0.792438	0.475254	13
3.33	0.620769	0.26616	0.781608	0.45993	13
3.42	0.638462	0.275918	0.805197	0.471726	13
3.5	0.636154	0.279897	0.805294	0.467014	13
3.58	0.631538	0.281835	0.801849	0.461227	13
3.67	0.617692	0.283406	0.788953	0.446431	13
3.75	0.620769	0.278282	0.788934	0.452605	13
3.83	0.613077	0.263577	0.772355	0.453799	13
3.92	0.611538	0.280828	0.781241	0.441836	13
4	0.6	0.262552	0.758658	0.441342	13
4.08	0.599231	0.270415	0.762641	0.435821	13
4.17	0.596154	0.283741	0.767617	0.424691	13
4.25	0.580769	0.282414	0.75143	0.410108	13
4.33	0.573846	0.265001	0.733985	0.413708	13
4.42	0.571538	0.256737	0.726683	0.416394	13
4.5	0.564615	0.264311	0.724337	0.404894	13
4.58	0.538462	0.252648	0.691135	0.385788	13
4.67	0.528462	0.24231	0.674888	0.382035	13
4.75	0.514615	0.23677	0.657694	0.371536	13
4.83	0.526154	0.245681	0.674617	0.377691	13
4.92	0.515385	0.269277	0.678107	0.352662	13
5	0.486154	0.255328	0.640447	0.331861	13
5.08	0.481538	0.243237	0.628525	0.334552	13
5.17	0.476154	0.239428	0.620839	0.331469	13
5.25	0.462308	0.250505	0.613686	0.310929	13
5.33	0.464615	0.253365	0.617722	0.311509	13
5.42	0.453077	0.248374	0.603168	0.302986	13
5.5	0.445385	0.24292	0.59218	0.298589	13
5.58	0.446923	0.265719	0.607495	0.286351	13
5.67	0.435385	0.255036	0.589502	0.281268	13
5.75	0.44	0.259936	0.597078	0.282922	13
5.83	0.432308	0.253645	0.585584	0.279031	13
5.92	0.431538	0.253963	0.585007	0.27807	13
6	0.433077	0.262405	0.591647	0.274507	13
6.08	0.415385	0.257249	0.570838	0.259931	13
6.17	0.421538	0.250461	0.572891	0.270186	13
6.25	0.416923	0.249011	0.567399	0.266447	13
6.33	0.424615	0.258186	0.580636	0.268595	13
6.42	0.43	0.266083	0.590792	0.269208	13
6.5	0.407692	0.254596	0.561543	0.253841	13
6.58	0.432308	0.267524	0.593971	0.270644	13
6.67	0.423077	0.261355	0.581012	0.265142	13
6.75	0.410769	0.25108	0.562495	0.259043	13
6.83	0.416154	0.25158	0.568182	0.264126	13
6.92	0.411538	0.252417	0.564072	0.259005	13
7	0.401538	0.248859	0.551922	0.251155	13
7.08	0.396923	0.251276	0.548768	0.245078	13
7.17	0.399231	0.254148	0.552811	0.245651	13
7.25	0.416154	0.263203	0.575206	0.257102	13
7.33	0.405385	0.252904	0.558213	0.252556	13
7.42	0.416154	0.265284	0.576463	0.255844	13
7.5	0.406923	0.253948	0.560383	0.253464	13
7.58	0.39	0.245696	0.538473	0.241527	13
7.67	0.398462	0.252944	0.551314	0.245609	13
7.75	0.4	0.2502	0.551194	0.248806	13
7.83	0.393077	0.251641	0.545142	0.241012	13
7.92	0.3925	0.260493	0.55801	0.22699	12
8	0.393333	0.268712	0.564065	0.222602	12
8.08	0.3975	0.261781	0.563828	0.231172	12
8.17	0.405	0.278356	0.581859	0.228141	12
8.25	0.385833	0.264385	0.553815	0.217851	12
8.33	0.390833	0.252567	0.551307	0.23036	12
8.42	0.376667	0.251083	0.536197	0.217136	12
8.5	0.38	0.261464	0.546127	0.213873	12
8.58	0.3775	0.250894	0.53691	0.21809	12
8.67	0.37	0.264162	0.537841	0.202159	12
8.75	0.375	0.263145	0.542195	0.207805	12
8.83	0.3775	0.258497	0.541741	0.213259	12
8.92	0.386667	0.273407	0.560381	0.212952	12
9	0.380833	0.267767	0.550964	0.210702	12
9.08	0.38	0.266595	0.549386	0.210614	12
9.17	0.39	0.277947	0.566599	0.213401	12
9.25	0.375	0.272347	0.548041	0.201959	12
9.33	0.376667	0.264105	0.544471	0.208862	12
9.42	0.370833	0.270772	0.542874	0.198793	12
9.5	0.3725	0.274562	0.546948	0.198052	12
9.58	0.370833	0.264385	0.538815	0.202851	12
9.67	0.3875	0.277493	0.563811	0.211189	12
9.75	0.385	0.277767	0.561485	0.208515	12
9.83	0.37	0.26697	0.539624	0.200376	12
9.92	0.375	0.26892	0.545864	0.204136	12
10	0.373333	0.272274	0.546328	0.200338	12
10.08	0.363333	0.25213	0.523529	0.203137	12
10.17	0.366667	0.261685	0.532933	0.2004	12
10.25	0.380833	0.273012	0.554297	0.20737	12
10.33	0.378333	0.268187	0.548731	0.207935	12
10.42	0.396667	0.289744	0.580761	0.212572	12
10.5	0.393333	0.27344	0.567069	0.219598	12
10.58	0.373333	0.27107	0.545563	0.201104	12
10.67	0.375833	0.276289	0.551379	0.200288	12
10.75	0.369167	0.271777	0.541846	0.196488	12
10.83	0.365	0.260402	0.530451	0.199549	12
10.92	0.358333	0.256828	0.521514	0.195153	12
11	0.363333	0.256562	0.526345	0.200321	12
11.08	0.364167	0.261306	0.530193	0.19814	12
11.17	0.37	0.266014	0.539017	0.200983	12
11.25	0.3575	0.255881	0.520079	0.194921	12
11.33	0.361667	0.260727	0.527325	0.196008	12
11.42	0.3625	0.264442	0.530518	0.194482	12
11.5	0.353333	0.252707	0.513895	0.192771	12
11.58	0.358333	0.260029	0.523548	0.193119	12
11.67	0.365833	0.267971	0.536094	0.195573	12
11.75	0.364167	0.260121	0.52944	0.198894	12
11.83	0.359167	0.25798	0.523079	0.195254	12
11.92	0.364167	0.265414	0.532803	0.195531	12
12	0.356667	0.255959	0.519295	0.194038	12
