# Supplementary material for: Rapid adaptation of endocytosis, exocytosis, and eisosomes after an acute increase in membrane tension in yeast cells
Source: eLife. 2021 May 13;10:e62084. doi: 10.7554/eLife.62084 (PMC9045820; doi:10.7554/eLife.62084)
Supplement: Figure 2—source data 1. [file elife-62084-fig2-data1.xlsx]

## Sheet: Survival
Protoplats
ΔP=-0.05 M
	WT			pil1Δ
	Survival rate (%)	N		Survival rate (%)	N
Steady state in 0.4M	0.895161	124		0.924528	106
0 min after shock	0.948571	175		0.945122	164
2 min after shock	0.912281	171		0.804348	138
8 min after shock	0.871166	163		0.837607	117
