# Supplementary material for: Rapid adaptation of endocytosis, exocytosis, and eisosomes after an acute increase in membrane tension in yeast cells
Source: eLife. 2021 May 13;10:e62084. doi: 10.7554/eLife.62084 (PMC9045820; doi:10.7554/eLife.62084)
Supplement: Figure 2—source data 2. [file elife-62084-fig2-data2.xlsx]

## Sheet: Survival
Protoplats
ΔP=-0.1 M
	WT			pil1Δ
	Survival rate (%)	N		Survival rate (%)	N
Steady state in 0.4M	1	79		0.986111	72
0 min after shock	1	53		1	140
2 min after shock	0.989011	91		0.301676	179
8 min after shock	0.912088	91		0.275362	138
