# Supplementary material for: Rapid adaptation of endocytosis, exocytosis, and eisosomes after an acute increase in membrane tension in yeast cells
Source: eLife. 2021 May 13;10:e62084. doi: 10.7554/eLife.62084 (PMC9045820; doi:10.7554/eLife.62084)
Supplement: Figure 2—source data 3. [file elife-62084-fig2-data3.xlsx]

## Sheet: Survival
Protoplats
ΔP=-0.2 M
	WT			pil1Δ
	Survival rate (%)	N		Survival rate (%)	N
Steady state in 0.4M	0.985714	70		1	151
0 min after shock	0.841463	164		0.965517	145
2 min after shock	0.774194	124		0.526316	114
8 min after shock	0.707071	198		0.376471	170
