# Supplementary material for: Rapid adaptation of endocytosis, exocytosis, and eisosomes after an acute increase in membrane tension in yeast cells
Source: eLife. 2021 May 13;10:e62084. doi: 10.7554/eLife.62084 (PMC9045820; doi:10.7554/eLife.62084)
Supplement: Figure 2—source data 4. [file elife-62084-fig2-data4.xlsx]

## Sheet: Survival
Protoplats
Steady state in 0.25M
ΔP=-0.1M
	WT			pil1Δ
	Survival rate (%)	N		Survival rate (%)	N
Steady state in 0.25M	0.921569	51		0.959184	49
0 min after shock	0.96	50		0.871795	39
2 min after shock	0.565217	69		0.592593	27
4 min after shock	0.547619	42		0.547619	42
