# Supplementary material for: Rapid adaptation of endocytosis, exocytosis, and eisosomes after an acute increase in membrane tension in yeast cells
Source: eLife. 2021 May 13;10:e62084. doi: 10.7554/eLife.62084 (PMC9045820; doi:10.7554/eLife.62084)
Supplement: Figure 2—source data 5. [file elife-62084-fig2-data5.xlsx]

## Sheet: Sheet1
Walled cells
Consecutive shocks between 0 M and 1.2 M
	WT				pil1Δ
# shock	Mean	SD	N		Mean	SD	N
1	100	0	3		94.8205	7.67742	3
2	100	0	3		86.2564	16.4704	3
3	99.4536	0.946473	3		71.7692	11.5095	3
