# Supplementary material for: Rapid adaptation of endocytosis, exocytosis, and eisosomes after an acute increase in membrane tension in yeast cells
Source: eLife. 2021 May 13;10:e62084. doi: 10.7554/eLife.62084 (PMC9045820; doi:10.7554/eLife.62084)
Supplement: Figure 3—source data 1. [file elife-62084-fig3-data1.xlsx]

## Sheet: CME density
WT
Protoplats
	ΔP=-0.05 M				ΔP=-0.1 M				ΔP=-0.2 M
	Density of CME events (%)	SEM	N		Density of CME events (%)	SEM	N		Density of CME events (%)	SEM	N
Steady state in 0.4M	1	0.026451	172		1	0.0285753	127		1	0.0287781	146
0 min after shock	0.923795	0.0394456	102		0.822958	0.0284084	62		0.636405	0.0224597	149
2 min after shock	0.996368	0.0369131	117		0.791427	0.0444316	70		0.73935	0.0286756	158
4 min after shock	0.985178	0.0309268	114		0.865488	0.0370753	78		0.950727	0.0444496	83
6 min after shock	0.963269	0.0348247	113		0.95217	0.0462059	62		0.935494	0.0294603	107
8 min after shock	0.96212	0.0363569	124		0.942583	0.0398368	54		0.959415	0.0448558	83

## Sheet: Volume
WT
Protoplats
	ΔP=-0.05 M				ΔP=-0.1 M				ΔP=-0.2 M
	Volume (%)	SEM	N		Volume (%)	SEM	N		Volume (%)	SEM	N
Steady state in 0.4M	1	0.0255876	146		1	0.0265499	196		1	0.030464	103
0 min after shock	1.16873	0.0280496	149		1.2553	0.0450168	62		1.13662	0.0365011	118
2 min after shock	1.20543	0.0301974	158		1.48173	0.0407066	70		1.18751	0.0347193	133
4 min after shock	1.2624	0.0429003	83		1.52755	0.0453279	78		1.13818	0.0335216	114
6 min after shock	1.24182	0.031578	107		1.50872	0.0588894	62		1.13479	0.03659	127
8 min after shock	1.22455	0.0216944	241		1.48927	0.0526305	54		1.16863	0.0334789	124

## Sheet: ANOVA (ΔP=-0.05 M)
One -way ANOVA
Significance level	α =	0.05
	mean	stdev	N
Steady-state at 0.4 M	1	0.346902	172
0 min after ΔP=-0.2 M	0.923795	0.398381	102
2 min after ΔP=-0.2 M	0.996368	0.399276	117
4 min after ΔP=-0.2 M	0.985178	0.330208	114
6 min after ΔP=-0.2 M	0.963269	0.370191	113
8 min after ΔP=-0.2 M	0.96212	0.404853	124
						ANOVA between steady-state and 0 min	ANOVA between steady-state and 2 min	ANOVA between steady-state and 4 min	ANOVA between steady-state and 6 min	ANOVA between steady-state and 8 min
Overall mean	m=	0.97475				0.971632	0.99853	0.994092	0.985436	0.984132
Between-group degrees of freedom	dfb=	5				1	1	1	1	1
Between-group mean square value	MSb=	0.0952495				0.371833	0.000918601	0.0150609	0.0920086	0.103387
Within-group degrees of freedom	dfw=	736				272	287	284	283	294
Within-group mean square value	MSw=	0.139852				0.134587	0.136136	0.115843	0.12695	0.138567
F-ratio	F=	0.681074				2.76276	0.00674765	0.130011	0.72476	0.746117
Critical value	Fcrit=	2.22627				3.87587	3.87406	3.87441	3.87453	3.87328
p-value	p=	0.637895				0.0976333	0.934589	0.718688	0.395307	0.388412
There is a statistically significant difference between conditions						The difference between steady-state and 0 min after shock is not statistically significant	The difference between steady-state and 2 min after shock is not statistically significant	The difference between steady-state and 4 min after shock is not statistically significant	The difference between steady-state and 6 min after shock is not statistically significant	The difference between steady-state and 8 min after shock is not statistically significant

## Sheet: ANOVA (ΔP=-0.1 M)
One -way ANOVA
Significance level	α =	0.05
	mean	stdev	N
Steady-state at 0.4 M	1	0.322027	127
0 min after ΔP=-0.2 M	0.822958	0.223688	62
2 min after ΔP=-0.2 M	0.791427	0.371741	70
4 min after ΔP=-0.2 M	0.865488	0.32744	78
6 min after ΔP=-0.2 M	0.95217	0.363826	62
8 min after ΔP=-0.2 M	0.942583	0.292739	54
						ANOVA between steady-state and 0 min	ANOVA between steady-state and 2 min	ANOVA between steady-state and 4 min	ANOVA between steady-state and 6 min	ANOVA between steady-state and 8 min
Overall mean	m=	0.906988				0.941923	0.925888	0.94882	0.98431	0.98287
Between-group degrees of freedom	dfb=	5				1	1	1	1	1
Between-group mean square value	MSb=	0.560124				1.30583	1.96314	0.874314	0.0953076	0.124909
Within-group degrees of freedom	dfw=	447				187	195	203	187	179
Within-group mean square value	MSw=	0.104085				0.0861958	0.115906	0.105035	0.113053	0.0983704
F-ratio	F=	5.38141				15.1496	16.9374	8.32402	0.843034	1.26978
Critical value	Fcrit=	2.23418				3.89167	3.88959	3.88768	3.89167	3.89393
p-value	p=	8.10462e-05				0.000138055	5.69779e-05	0.004335	0.359713	0.261315
There is a statistically significant difference between conditions						The difference between steady-state and 0 min after shock is statistically significant	The difference between steady-state and 2 min after shock is statistically significant	The difference between steady-state and 4 min after shock is statistically significant	The difference between steady-state and 6 min after shock is not statistically significant	The difference between steady-state and 8 min after shock is not statistically significant

## Sheet: ANOVA (ΔP=-0.2 M)
One -way ANOVA
Significance level	α =	0.05
	mean	stdev	N
Steady-state at 0.4 M	1	0.347728	146
0 min after ΔP=-0.2 M	0.636405	0.274156	149
2 min after ΔP=-0.2 M	0.73935	0.360447	158
4 min after ΔP=-0.2 M	0.950727	0.404955	83
6 min after ΔP=-0.2 M	0.935494	0.304739	107
8 min after ΔP=-0.2 M	0.959415	0.408655	83
						ANOVA between steady-state and 0 min	ANOVA between steady-state and 2 min	ANOVA between steady-state and 4 min	ANOVA between steady-state and 6 min	ANOVA between steady-state and 8 min
Overall mean	m=	0.848872				0.816354	0.864531	0.982141	0.972719	0.98529
Between-group degrees of freedom	dfb=	5				1	1	1	1	1
Between-group mean square value	MSb=	2.92683				9.74884	5.15526	0.128475	0.256934	0.0871631
Within-group degrees of freedom	dfw=	720				293	302	227	251	227
Within-group mean square value	MSw=	0.119499				0.0978038	0.125597	0.136474	0.109069	0.137562
F-ratio	F=	24.4926				99.6775	41.046	0.941388	2.35569	0.633629
Critical value	Fcrit=	2.22654				3.87339	3.87243	3.88275	3.87877	3.88275
p-value	p=	0				0	5.69539e-10	0.332954	0.126086	0.426859
There is a statistically significant difference between conditions						The difference between steady-state and 0 min after shock is statistically significant	The difference between steady-state and 2 min after shock is statistically significant	The difference between steady-state and 4 min after shock is not statistically significant	The difference between steady-state and 6 min after shock is not statistically significant	The difference between steady-state and 8 min after shock is not statistically significant
