# Supplementary material for: Rapid adaptation of endocytosis, exocytosis, and eisosomes after an acute increase in membrane tension in yeast cells
Source: eLife. 2021 May 13;10:e62084. doi: 10.7554/eLife.62084 (PMC9045820; doi:10.7554/eLife.62084)
Supplement: Figure 3—source data 2. [file elife-62084-fig3-data2.xlsx]

## Sheet: CME density
pil1Δ
Protoplats
	ΔP=-0.025 M				ΔP=-0.05 M				ΔP=-0.1 M
	Density of CME events (%)	SEM	N		Density of CME events (%)	SEM	N		Density of CME events (%)	SEM	N
Steady state in 0.4M	1	0.0409205	99		1	0.0221437	263		1	0.0273739	151
0 min after shock	0.816348	0.0324132	100		0.668736	0.0475735	57		0.323318	0.0179234	125
2 min after shock	0.76042	0.0383156	71		0.679982	0.041863	48		0.206625	0.0477295	78
4 min after shock	0.757153	0.0441501	70		0.720284	0.0270194	82
6 min after shock	0.80733	0.0333104	98		0.78843	0.0298774	83
8 min after shock	0.800769	0.0293954	118		0.744542	0.0319204	85
10 min after shock	0.845178	0.0374105	96		0.832521	0.0336678	70

## Sheet: Volume
pil1Δ
Protoplats
	ΔP=-0.025 M				ΔP=-0.05 M				ΔP=-0.1 M
	Volume (%)	SEM	N		Volume (%)	SEM	N		Volume (%)	SEM	N
Steady state in 0.4M	1	0.0376939	99		1	0.0212006	263		1	0.0269505	151
0 min after shock	1.02632	0.0402309	100		1.12041	0.0400903	106		1.17586	0.0329513	125
2 min after shock	1.06133	0.0450316	71		1.1848	0.0425333	111		1.34209	0.0578984	78
4 min after shock	1.11546	0.0505382	70		1.21147	0.0442752	106
6 min after shock	1.12371	0.0397623	98		1.23645	0.0412653	103
8 min after shock	1.0982	0.0395336	118		1.19125	0.0349054	123
10 min after shock	1.09973	0.0412806	96		1.2105	0.0366335	104

## Sheet: ANOVA (ΔP=-0.025 M)
One -way ANOVA
Significance level	α =	0.05
	mean	stdev	N
Steady-state at 0.4 M	1	0.407154	99
0 min after ΔP=-0.025 M	0.816348	0.324132	100
2 min after ΔP=-0.025 M	0.76042	0.322853	71
4 min after ΔP=-0.025 M	0.757153	0.369387	70
6 min after ΔP=-0.025 M	0.80733	0.329756	98
8 min after ΔP=-0.025 M	0.800769	0.319316	118
10 min after ΔP=-0.025 M	0.845178	0.366546	96
						ANOVA between steady-state and 0 min	ANOVA between steady-state and 2 min	ANOVA between steady-state and 4 min	ANOVA between steady-state and 6 min	ANOVA between steady-state and 8 min	ANOVA between steady-state and 10 min
Overall mean	m=	0.831858				0.907713	0.89994	0.899413	0.904154	0.891662	0.92378
Between-group degrees of freedom	dfb=	6				1	1	1	1	1	1
Between-group mean square value	MSb=	0.627667				1.67792	2.37326	2.41831	1.8282	2.13684	1.30418
Within-group degrees of freedom	dfw=	645				197	168	167	195	215	193
Within-group mean square value	MSw=	0.121859				0.135264	0.140133	0.153657	0.137403	0.131049	0.150309
F-ratio	F=	5.15074				12.4048	16.9358	15.7384	13.3054	16.3057	8.67661
Critical value	Fcrit=	2.11262				3.8891	3.89741	3.89775	3.88959	3.88507	3.89009
p-value	p=	3.47706e-05				0.00053213	6.04661e-05	0.000107757	0.000339585	7.49875e-05	0.00361976
There is a statistically significant difference between conditions						The difference between steady-state and 0 min after shock is statistically significant	The difference between steady-state and 2 min after shock is statistically significant	The difference between steady-state and 4 min after shock is statistically significant	The difference between steady-state and 6 min after shock is statistically significant	The difference between steady-state and 8 min after shock is statistically significant	The difference between steady-state and 8 min after shock is statistically significant
All conditions after the shock						ANOVA between 0 min and 10 min	ANOVA between 2 min and 10 min	ANOVA between 4 min and 10 min	ANOVA between 6 min and 10 min	ANOVA between 8 min and 10 min
	m=	0.801757				0.830469	0.809143	0.808059	0.826059	0.820691
	dfb=	5				1	1	1	1	1
	MSb=	0.0932068				0.0407089	0.293207	0.31367	0.0694688	0.104396
	dfw=	547				194	165	164	192	212
	MSw=	0.113992				0.119407	0.103403	0.114323	0.120163	0.127286
	F=	0.817663				0.340926	2.83557	2.74372	0.578123	0.82017
	Fcrit=	2.23049				3.88984	3.89844	3.89879	4.24524	4.2398
	p=	0.537349				0.559973	0.0940888	0.0995493	0.447982	0.366159
There is no stastistically significant difference between different time points after the shock						The difference between 0 min and 10 min after shock is not statistically significant	The difference between 2 min and 10 min after shock is not statistically significant	The difference between 4 min and 10 min after shock is not statistically significant	The difference between 6 min and 10 min after shock is not statistically significant	The difference between 8 min and 10 min after shock is not statistically significant

## Sheet: ANOVA (ΔP=-0.05 M)
One -way ANOVA
Significance level	α =	0.05
	mean	stdev	N
Steady-state at 0.4 M	1	0.35911	263
0 min after ΔP=-0.05 M	0.668736	0.359172	57
2 min after ΔP=-0.05 M	0.679982	0.290036	48
4 min after ΔP=-0.05 M	0.720284	0.244671	82
6 min after ΔP=-0.05 M	0.78843	0.272196	83
8 min after ΔP=-0.05 M	0.744542	0.294291	85
10 min after ΔP=-0.05 M	0.832521	0.281685	70
						ANOVA between steady-state and 0 min	ANOVA between steady-state and 2 min	ANOVA between steady-state and 4 min	ANOVA between steady-state and 6 min	ANOVA between steady-state and 8 min	ANOVA between steady-state and 10 min
Overall mean	m=	0.842765				0.940994	0.950608	0.933517	0.949248	0.937604	0.964794
Between-group degrees of freedom	dfb=	6				1	1	1	1	1	1
Between-group mean square value	MSb=	1.96715				5.14078	4.15705	4.89087	2.824	4.19212	1.81316
Within-group degrees of freedom	dfw=	681				318	309	343	344	346	331
Within-group mean square value	MSw=	0.100793				0.128968	0.12214	0.112643	0.115881	0.118678	0.118618
F-ratio	F=	19.5168				39.8609	34.0352	43.4192	24.3698	35.3235	15.2857
Critical value	Fcrit=	2.11188				3.87087	3.87173	3.86871	3.86863	3.86847	3.86971
p-value	p=	0				9.16422e-10	1.36525e-08	1.66574e-10	1.2418e-06	6.81739e-09	0.00011212
There is a statistically significant difference between conditions						The difference between steady-state and 0 min after shock is statistically significant	The difference between steady-state and 2 min after shock is statistically significant	The difference between steady-state and 4 min after shock is statistically significant	The difference between steady-state and 6 min after shock is statistically significant	The difference between steady-state and 8 min after shock is statistically significant	The difference between steady-state and 8 min after shock is statistically significant
All conditions after the shock						ANOVA between 0 min and 10 min	ANOVA between 2 min and 10 min	ANOVA between 4 min and 10 min	ANOVA between 6 min and 10 min	ANOVA between 8 min and 10 min
	m=	0.745465				0.759011	0.770471	0.771972	0.808602	0.784274
	dfb=	5				1	1	1	1	1
	MSb=	0.25544				0.842782	0.662549	0.475709	0.0738197	0.297125
	dfw=	419				125	116	150	151	153
	MSw=	0.0831796				0.101593	0.0754286	0.0825911	0.0924026	0.101999
	F=	3.07095				8.29566	8.78379	5.75981	0.798892	2.91301
	Fcrit=	2.23553				3.91693	3.92288	3.9042	3.90378	3.90296
	p=	0.00980557				0.00467749	0.00368893	0.0176232	0.372847	0.0898967
There is a stastistically significant difference between different time points after the shock						The difference between 0 min and 10 min after shock is statistically significant	The difference between 2 min and 10 min after shock is statistically significant	The difference between 4 min and 10 min after shock is statistically significant	The difference between 6 min and 10 min after shock is not statistically significant	The difference between 8 min and 10 min after shock is not statistically significant

## Sheet: ANOVA (ΔP=-0.1 M)
One -way ANOVA
Significance level	α =	0.05
	mean	stdev	N
Steady-state at 0.4 M	1	0.336376	151
0 min after ΔP=-0.1 M	0.323318	0.20039	125
2 min after ΔP=-0.1 M	0.206625	0.421535	78
						ANOVA between steady-state and 0 min	ANOVA between steady-state and 2 min
Overall mean	m=	0.586247				0.693532	0.729768
Between-group degrees of freedom	dfb=	5				1	1
Between-group mean square value	MSb=	9.14643				31.3146	32.3737
Within-group degrees of freedom	dfw=	348				274	227
Within-group mean square value	MSw=	0.102396				0.0801155	0.135042
F-ratio	F=	89.3238				390.868	239.731
Critical value	Fcrit=	2.23993				3.87562	3.88275
p-value	p=	0				0	0
There is a statistically significant difference between conditions						The difference between steady-state and 0 min after shock is statistically significant	The difference between steady-state and 2 min after shock is statistically significant
All conditions after the shock
	m=	0.278481
	dfb=	2
	MSb=	0.327016
	dfw=	200
	MSw=	0.0933082
	F=	3.50469
	Fcrit=	3.04106
	p=	0.0319152
There is a stastistically significant difference between different time points after the shock
