# Supplementary material for: Rapid adaptation of endocytosis, exocytosis, and eisosomes after an acute increase in membrane tension in yeast cells
Source: eLife. 2021 May 13;10:e62084. doi: 10.7554/eLife.62084 (PMC9045820; doi:10.7554/eLife.62084)
Supplement: Figure 3—source data 3. [file elife-62084-fig3-data3.xlsx]

## Sheet: CME density
Walled cells
	WT				pil1Δ
	Density of CME events (#/um)	SEM	N		Density of CME events (#/um)	SEM	N
Steady state in 0 M	1.14175	0.0195572	240		1.12592	0.0259878	188
Steady state in 0.8 M	1.15824	0.029299	103		1.42048	0.0386767	105
Steady state in 1.2 M	1.25157	0.0291521	159		1.6377	0.0306867	183
Steady state in 2 M	1.24916	0.0281049	161		1.75574	0.0506956	80

## Sheet: ANOVA (WT)
One -way ANOVA
Significance level	α =	0.05
	mean	stdev	N
Steady-state in 0 M	1.14175	0.302979	240
Steady-state in 0.8 M	1.15824	0.297352	103
Steady-state in 1.2 M	1.25157	0.367594	159
Steady-state in 2 M	1.24916	0.356612	161
						ANOVA between 0 M and 0.8 M	ANOVA between 0 M and 1.2 M	ANOVA between 0 M and 2 M	ANOVA between 0.8 M and 1.2 M	ANOVA between 0.8 M and 2 M	ANOVA between 1.2 M and 2 M
Overall mean	m=	1.19673				1.1467	1.18551	1.18487	1.21488	1.21368	1.25035
Between-group degrees of freedom	dfb=	3				1	1	1	1	1	1
Between-group mean square value	MSb=	0.599592				0.0195948	1.15342	1.11166	0.544466	0.519248	0.000464564
Within-group degrees of freedom	dfw=	659				341	397	399	260	262	318
Within-group mean square value	MSw=	0.110251				0.0907858	0.10904	0.105982	0.113294	0.112085	0.131123
F-ratio	F=	5.43844				0.215835	10.5779	10.4891	4.80579	4.63265	0.00354295
Critical value	Fcrit=	2.61842				3.86887	3.86499	3.86487	3.87747	3.8772	3.87087
p-value	p=	0.00106706				0.642528	0.00124234	0.0013013	0.0292509	0.0322826	0.952573
There is a statistically significant difference between conditions						The difference between steady-state in 0 M and 0.8 M is not statistically significant	The difference between steady-state in 0 M and 1.2 M is statistically significant	The difference between steady-state in 0 M and 2 M is statistically significant	The difference between steady-state in 0.8 M and 1.2 M is statistically significant	The difference between steady-state in 0.8 M and 2 M is statistically significant	The difference between steady-state in 1.2 M and 2 M is not statistically significant

## Sheet: ANOVA (pil1Δ)
One -way ANOVA
Significance level	α =	0.05
	mean	stdev	N
Steady-state in 0 M	1.12592	0.356326	188
Steady-state in 0.8 M	1.42048	0.396318	105
Steady-state in 1.2 M	1.6377	0.415122	183
Steady-state in 2 M	1.75574	0.453435	80
						ANOVA between 0 M and 0.8 M	ANOVA between 0 M and 1.2 M	ANOVA between 0 M and 2 M	ANOVA between 0.8 M and 1.2 M	ANOVA between 0.8 M and 2 M	ANOVA between 1.2 M and 2 M
Overall mean	m=	1.44061				1.23148	1.37836	1.31393	1.5585	1.56545	1.6736
Between-group degrees of freedom	dfb=	3				1	1	1	1	1	1
Between-group mean square value	MSb=	11.2376				5.84533	24.2881	22.2609	3.14813	5.10363	0.775635
Within-group degrees of freedom	dfw=	552				291	369	266	286	183	261
Within-group mean square value	MSw=	0.158848				0.137726	0.14934	0.150322	0.177009	0.17802	0.182398
F-ratio	F=	70.7442				42.4419	162.636	148.087	17.7851	28.6688	4.25242
Critical value	Fcrit=	2.62105				3.87361	3.86678	3.87666	3.87418	3.89278	3.87733
p-value	p=	0				3.19596e-10	0	0	3.32202e-05	2.55294e-07	0.0401842
There is a statistically significant difference between conditions						The difference between steady-state in 0 M and 0.8 M is statistically significant	The difference between steady-state in 0 M and 1.2 M is statistically significant	The difference between steady-state in 0 M and 2 M is statistically significant	The difference between steady-state in 0.8 M and 1.2 M is statistically significant	The difference between steady-state in 0.8 M and 2 M is statistically significant	The difference between steady-state in 1.2 M and 2 M is statistically significant
