# Supplementary material for: Rapid adaptation of endocytosis, exocytosis, and eisosomes after an acute increase in membrane tension in yeast cells
Source: eLife. 2021 May 13;10:e62084. doi: 10.7554/eLife.62084 (PMC9045820; doi:10.7554/eLife.62084)
Supplement: Figure 3—source data 4. [file elife-62084-fig3-data4.xlsx]

## Sheet: CME density
Walled cells
	WT				pil1Δ
	ΔP=-1.2 M				ΔP=-1.2 M
	Density of CME events (#/um)	SEM	N		Density of CME events (#/um)	SEM	N
Steady state in 1.2 M	1.22289	0.0378832	62		1.64136	0.0374307	119
0 min after shock	0.804894	0.0255643	82		0.89223	0.023924	69
2 min after shock	1.0262	0.0287406	77		1.09379	0.0438262	44
4 min after shock	1.13074	0.0286395	67		1.02444	0.0355336	67
6 min after shock	1.05814	0.0327772	66

## Sheet: ANOVA (WT)
One -way ANOVA
Significance level	α =	0.05
	mean	stdev	N
Steady-state in 1.2 M	1.22289	0.298292	62
0 min after ΔP=-1.2 M	0.804894	0.231495	82
2 min after ΔP=-1.2 M	1.0262	0.252198	77
4 min after ΔP=-1.2 M	1.13074	0.234424	67
6 min after ΔP=-1.2 M	1.05814	0.266284	66
						ANOVA between steady-state and 0 min	ANOVA between steady-state and 2 min	ANOVA between steady-state and 4 min	ANOVA between steady-state and 6 min
Overall mean	m=	1.03513				0.984864	1.11393	1.17503	1.13794
Between-group degrees of freedom	dfb=	4				1	1	1	1
Between-group mean square value	MSb=	1.7965				6.16856	1.32865	0.273407	0.867682
Within-group degrees of freedom	dfw=	349				142	137	127	126
Within-group mean square value	MSw=	0.0654392				0.0687919	0.0749018	0.0712967	0.0796557
F-ratio	F=	27.453				89.6698	17.7385	3.83477	10.8929
Critical value	Fcrit=	2.39753				3.90778	3.91023	3.91573	3.91632
p-value	p=	0				0	4.56576e-05	0.0523919	0.00125576
There is a statistically significant difference between conditions						The difference between steady-state and 0 min after shock is statistically significant	The difference between steady-state and 2 min after shock is statistically significant	The difference between steady-state and 4 min after shock is not statistically significant	The difference between steady-state and 6 min after shock is statistically significant
All conditions after the shock						ANOVA between 0 min and 6 min	ANOVA between 2 min and 6 min	ANOVA between 4 min and 6 min
	m=	0.995261				0.917829	1.04094	1.09472
	dfb=	3				1	1	1
	MSb=	1.51205				2.34523	0.0362502	0.175258
	dfw=	288				146	141	131
	MSw=	0.0604535				0.0612995	0.0646769	0.0564107
	F=	25.0118				38.2585	0.560481	3.10683
	Fcrit=	2.63595				3.90594	3.90826	3.91343
	p=	2.06501e-14				5.90675e-09	0.455313	0.0802967
There is a stastistically significant difference between different time points after the shock						The difference between 0 min and 6 min after shock is not statistically significant	The difference between 2 min and 6 min after shock is not statistically significant	The difference between 4 min and 6 min after shock is not statistically significant

## Sheet: ANOVA (pil1Δ)
One -way ANOVA
Significance level	α =	0.05
	mean	stdev	N
Steady-state in 1.2 M	1.64136	0.408321	119
0 min after ΔP=-1.2 M	0.89223	0.198728	69
2 min after ΔP=-1.2 M	1.09379	0.29071	44
4 min after ΔP=-1.2 M	1.02444	0.290855	67
						ANOVA between steady-state and 0 min	ANOVA between steady-state and 2 min	ANOVA between steady-state and 4 min
Overall mean	m=	1.24967				1.36641	1.49355	1.41914
Between-group degrees of freedom	dfb=	3				1	1	1
Between-group mean square value	MSb=	10.5136				24.5105	9.63133	16.3142
Within-group degrees of freedom	dfw=	295				186	161	184
Within-group mean square value	MSw=	0.107039				0.120211	0.144769	0.137267
F-ratio	F=	98.2213				203.896	66.5292	118.85
Critical value	Fcrit=	2.63521				3.89194	3.89987	3.89249
p-value	p=	0				0	9.25926e-14	0
There is a statistically significant difference between conditions						The difference between steady-state and 0 min after shock is statistically significant	The difference between steady-state and 2 min after shock is statistically significant	The difference between steady-state and 4 min after shock is statistically significant
All conditions after the shock						ANOVA between 0 min and 4 min	ANOVA between 2 min and 4 min
	m=	0.990712				0.957363	1.05193
	dfb=	2				1	1
	MSb=	0.60648				0.594175	0.127743
	dfw=	177				134	109
	MSw=	0.0672482				0.0617082	0.0845635
	F=	9.01853				9.62879	1.51061
	Fcrit=	3.04701				3.04701	3.04701
	p=	0.000186323				0.00233685	0.221693
There is a stastistically significant difference between different time points after the shock						The difference between 0 min and 4 min after shock is statistically significant	The difference between 2 min and 4 min after shock is not statistically significant
