# Supplementary material for: Rapid adaptation of endocytosis, exocytosis, and eisosomes after an acute increase in membrane tension in yeast cells
Source: eLife. 2021 May 13;10:e62084. doi: 10.7554/eLife.62084 (PMC9045820; doi:10.7554/eLife.62084)
Supplement: Figure 4—source data 1. [file elife-62084-fig4-data1.xlsx]

## Sheet: Sheet1
Walled cells
Wild-type
FM4-64 pulse chase
Time (s)	Normalized intensity
5	7.31769e-06
10	5.01827e-05
15	9.14864e-05
20	3.52872e-05
25	5.84112e-05
30	0.000162321
35	9.52598e-05
40	3.56775e-05
45	4.31253e-05
50	8.72915e-05
55	0.000108724
60	6.72903e-05
65	4.97924e-05
70	0.000101537
75	7.35671e-05
80	6.49482e-05
85	3.68486e-05
90	9.2137e-05
95	8.85927e-05
100	0.000101406
105	6.4688e-05
110	0.000113049
115	6.49482e-05
120	7.63306e-05
125	2.83599e-05
130	7.96827e-06
135	0.000116822
140	5.86715e-05
145	2.05217e-05
150	2.7449e-05
155	3.56775e-05
160	0.000117473
165	5.90618e-05
170	4.4947e-05
175	0.000136043
180	4.3906e-05
185	8.67711e-05
190	8.03642e-05
195	4.99225e-05
200	9.48695e-05
205	0.00015289
210	5.05731e-05
215	4.20844e-05
220	0.00021927
225	1.4245e-05
230	2.06518e-05
235	0.000100366
240	5.89317e-05
245	7.09647e-05
250	3.65884e-05
255	5.64595e-05
260	6.74204e-05
265	6.79722e-06
270	7.14852e-05
275	8.62506e-05
280	3.64582e-05
285	6.52084e-05
290	5.8151e-05
295	5.35657e-05
300	9.59104e-05
305	4.11736e-05
310	5.86715e-05
315	0.000117213
320	5.72402e-05
325	9.27876e-05
330	4.57277e-05
335	3.5027e-05
340	6.4688e-05
345	5.8151e-05
350	0.000100496
355	4.46867e-05
360	7.05432e-05
365	0.000137573
370	6.45579e-05
375	0.000104789
380	7.97136e-05
385	0.000243763
390	0.00158691
395	0.0139115
400	0.0588058
405	0.150351
410	0.332628
415	0.455809
420	0.592679
425	0.810508
430	0.815321
435	0.879554
440	0.953947
445	0.944573
450	1
455	0.995617
460	0.952789
465	1.04407
470	1.02238
475	0.95845
480	1.04501
485	1.04978
490	0.978034
495	1.0417
500	1.03974
505	1.03825
510	1.0824
515	1.04381
520	1.03662
525	1.08554
530	1.08339
535	1.10211
540	1.10826
545	1.08927
550	1.08478
555	1.10214
560	1.13996
565	1.1293
570	1.10884
575	1.13584
580	1.11546
585	1.14605
590	1.14748
595	1.09545
600	1.11843
605	1.18769
610	1.109
615	1.12724
620	1.1932
625	1.13246
630	1.16159
635	1.22016
640	1.14588
645	1.17862
650	1.20597
655	1.17607
660	1.19078
665	1.1887
670	1.12178
675	1.20606
680	1.22694
685	1.16854
690	1.19948
695	1.23616
700	1.20541
705	1.18393
710	1.22277
715	1.17662
720	1.2038
725	1.27312
730	1.16309
735	1.26417
740	1.28315
745	1.22297
750	1.25734
755	1.25795
760	1.19179
765	1.25507
770	1.25976
775	1.21165
780	1.2533
785	1.28564
790	1.24704
795	1.29063
800	1.26611
805	1.22165
810	1.27215
815	1.30153
820	1.2766
825	1.33844
830	1.30109
835	1.3109
840	1.35481
845	1.36362
850	1.28769
855	1.36849
860	1.27742
865	1.29441
870	1.36245
875	1.31913
880	1.33956
885	1.39214
890	1.33358
895	1.33726
900	1.41034
905	1.36624
910	1.36872
915	1.40891
920	1.34293
925	1.42176
930	1.38973
935	1.37896
940	1.37621
945	1.47556
950	1.33169
955	1.37163
960	1.43817
965	1.40729
970	1.39929
975	1.4329
980	1.36154
985	1.40147
990	1.48204
995	1.41803
1000	1.39916
1005	1.46794
1010	1.36833
1015	1.49953
1020	1.46251
1025	1.44438
1030	1.48467
1035	1.4888
1040	1.40989
1045	1.48543
1050	1.53213
1055	1.4375
1060	1.47938
1065	1.4958
1070	1.40625
1075	1.55629
1080	1.50771
1085	1.48982
1090	1.60908
1095	1.47693
1100	1.47986
1105	1.57272
1110	1.59459
1115	1.51707
1120	1.55674
1125	1.50929
1130	1.47596
1135	1.50266
1140	1.53233
1145	1.58854
1150	1.45206
1155	1.5924
1160	1.51646
1165	1.51428
1170	1.58654
1175	1.58541
1180	1.56247
1185	1.64887
1190	1.54112
1195	1.56121
1200	1.6099
1205	1.58294
1210	1.6655
1215	1.62281
1220	1.59964
1225	1.5838
1230	1.64126
1235	1.53262
1240	1.56026
1245	1.71577
1250	1.5766
1255	1.59576
1260	1.65004
1265	1.62453
1270	1.66142
1275	1.62859
1280	1.57029
1285	1.61861
1290	1.73556
1295	1.62555
1300	1.67902
1305	1.65319
1310	1.56764
1315	1.69284
1320	1.73992
1325	1.63494
1330	1.62324
1335	1.67606
1340	1.65085
1345	1.70913
1350	1.71013
1355	1.62457
1360	1.63901
1365	1.7116
1370	1.62385
1375	1.63728
1380	1.75789
1385	1.61668
1390	1.70177
1395	1.74166
1400	1.63895
1405	1.74539
1410	1.72519
1415	1.61913
1420	1.69219
1425	1.71654
1430	1.70942
1435	1.78348
1440	1.7323
1445	1.68901
1450	1.76274
1455	1.75769
1460	1.66811
1465	1.79489
1470	1.76387
1475	1.70877
1480	1.85552
1485	1.76116
1490	1.67252
1495	1.85347
1500	1.76231
1505	1.77425
1510	1.80298
1515	1.74815
1520	1.72608
1525	1.88788
1530	1.83248
1535	1.7913
1540	1.79158
1545	1.80703
1550	1.77563
1555	1.84808
1560	1.75992
1565	1.81278
1570	1.87325
1575	1.807
1580	1.78723
1585	1.89309
1590	1.85022
1595	1.79836
1600	1.83663
1605	1.8443
1610	1.91338
1615	1.76053
1620	1.88426
1625	1.83082
1630	1.93253
1635	1.83168
1640	1.833
1645	1.91566
1650	1.78432
1655	1.72475
1660	1.54415
1665	1.54732
1670	1.27633
1675	1.38807
1680	1.26509
1685	1.23397
1690	1.21781
1695	1.05505
1700	0.956908
1705	1.03415
1710	0.969121
1715	0.94173
1720	0.888706
1725	0.83787
1730	0.756514
1735	0.813606
1740	0.80962
1745	0.812231
1750	0.720162
1755	0.761601
1760	0.717101
1765	0.645098
1770	0.659467
1775	0.594161
1780	0.647338
1785	0.64702
1790	0.617897
1795	0.619622
1800	0.598442
1805	0.585789
1810	0.662204
1815	0.563729
1820	0.545522
1825	0.545444
1830	0.534273
1835	0.527877
1840	0.567331
1845	0.501444
1850	0.479029
1855	0.531726
1860	0.488631
1865	0.479047
1870	0.507068
1875	0.476519
1880	0.458666
1885	0.537207
1890	0.466842
1895	0.458967
1900	0.490675
1905	0.447004
1910	0.448595
1915	0.471033
1920	0.403378
1925	0.4553
1930	0.439898
1935	0.434836
1940	0.463099
1945	0.449229
1950	0.427811
1955	0.408889
1960	0.405957
1965	0.367647
1970	0.409247
1975	0.410617
1980	0.395462
1985	0.415691
1990	0.397612
1995	0.423103
2000	0.393737
2005	0.384567
2010	0.3854
2015	0.382649
2020	0.346405
2025	0.338461
2030	0.357097
2035	0.348718
2040	0.394926
2045	0.354934
2050	0.367503
2055	0.359619
2060	0.369872
2065	0.354169
2070	0.339019
2075	0.35494
2080	0.339122
2085	0.344547
2090	0.321256
2095	0.395849
2100	0.373675
2105	0.352172
2110	0.354305
2115	0.345359
2120	0.331422
2125	0.342786
2130	0.331077
2135	0.337491
2140	0.335055
2145	0.302991
2150	0.304081
2155	0.335045
2160	0.303304
2165	0.283807
2170	0.322515
2175	0.336934
2180	0.288838
2185	0.301528
2190	0.309554
2195	0.317156
2200	0.295239
2205	0.31104
2210	0.306922
2215	0.286982
2220	0.291427
2225	0.294538
2230	0.28863
2235	0.249175
2240	0.302051
2245	0.296397
2250	0.273817
2255	0.248813
2260	0.285987
2265	0.271059
2270	0.238352
2275	0.298864
2280	0.263579
2285	0.257542
2290	0.250587
2295	0.236445
2300	0.279924
2305	0.273855
2310	0.270222
2315	0.258265
2320	0.265371
2325	0.266369
2330	0.23401
2335	0.280989
2340	0.237619
2345	0.226249
2350	0.242199
2355	0.254856
2360	0.292712
2365	0.276775
2370	0.250333
2375	0.242691
2380	0.242625
2385	0.219885
2390	0.250411
2395	0.242512
2400	0.263238
2405	0.231205
2410	0.270256
2415	0.240986
2420	0.192603
2425	0.218764
2430	0.213936
2435	0.237306
2440	0.215216
2445	0.213042
2450	0.25217
2455	0.2111
2460	0.220211
2465	0.1992
2470	0.223889
2475	0.213175
2480	0.22407
2485	0.205855
2490	0.240452
2495	0.217773
2500	0.207307
2505	0.222353
2510	0.195582
2515	0.192075
2520	0.17382
2525	0.189393
2530	0.214182
2535	0.222574
2540	0.235291
2545	0.192805
2550	0.198354
2555	0.180226
2560	0.216147
2565	0.210146
2570	0.183958
2575	0.169986
2580	0.18222
2585	0.189083
2590	0.215491
2595	0.199834
2600	0.175511
2605	0.169549
2610	0.183037
2615	0.144205
2620	0.17357
2625	0.192087
2630	0.203142
2635	0.157797
2640	0.179846
2645	0.181693
2650	0.160923
2655	0.18005
2660	0.17983
2665	0.177602
2670	0.190513
2675	0.158621
2680	0.183645
2685	0.163574
2690	0.185937
2695	0.174927
2700	0.158198
2705	0.199078
2710	0.172724
2715	0.176074
2720	0.144301
2725	0.16448
2730	0.152525
2735	0.128415
2740	0.159743
2745	0.145877
2750	0.159513
2755	0.152776
2760	0.159668
2765	0.161664
2770	0.156772
2775	0.143971
2780	0.148427
2785	0.159784
2790	0.146156
2795	0.143349
2800	0.155744
2805	0.171646
2810	0.164891
2815	0.127539
2820	0.150636
2825	0.154018
2830	0.122723
2835	0.13024
2840	0.129235
2845	0.148895
2850	0.118286
2855	0.130492
2860	0.146628
2865	0.124419
2870	0.121121
2875	0.14652
2880	0.124914
2885	0.142233
2890	0.159934
2895	0.141031
2900	0.147855
2905	0.134969
2910	0.132035
2915	0.132769
2920	0.137141
2925	0.146109
2930	0.141402
2935	0.117584
2940	0.126838
2945	0.147575
2950	0.118638
2955	0.128647
2960	0.115671
2965	0.12112
2970	0.127111
2975	0.132452
2980	0.120756
2985	0.119144
2990	0.118066
2995	0.125764
3000	0.123654
3005	0.141623
3010	0.120566
3015	0.128525
3020	0.137096
3025	0.123285
3030	0.108103
3035	0.118942
3040	0.138113
3045	0.114754
3050	0.12303
3055	0.128126
3060	0.108101
3065	0.120544
3070	0.108838
3075	0.132476
3080	0.113962
3085	0.119476
3090	0.122957
3095	0.0910787
3100	0.107487
3105	0.115202
3110	0.104337
3115	0.108305
3120	0.0925074
3125	0.10438
3130	0.109203
3135	0.103974
3140	0.100805
3145	0.0957345
3150	0.116689
3155	0.100459
3160	0.125398
3165	0.0996334
3170	0.0966513
3175	0.103381
3180	0.10825
3185	0.119083
3190	0.0997995
3195	0.108042
3200	0.137624
3205	0.100502
3210	0.108195
3215	0.103121
3220	0.105922
3225	0.108574
3230	0.0995108
3235	0.106362
3240	0.103792
3245	0.0950898
3250	0.0936675
3255	0.102988
3260	0.0968462
3265	0.100486
3270	0.0905135
3275	0.110266
3280	0.0929032
3285	0.102922
3290	0.0956286
3295	0.106346
3300	0.105182
3305	0.109439
3310	0.102964
3315	0.084728
3320	0.0802245
3325	0.0937218
3330	0.0866598
3335	0.0926108
3340	0.0976348
3345	0.0887908
3350	0.0913188
3355	0.0905349
3360	0.0991287
3365	0.0900558
3370	0.0865316
3375	0.0942924
3380	0.0918945
3385	0.0913014
3390	0.0882891
3395	0.0651863
3400	0.0738666
3405	0.112535
