# Supplementary material for: Rapid adaptation of endocytosis, exocytosis, and eisosomes after an acute increase in membrane tension in yeast cells
Source: eLife. 2021 May 13;10:e62084. doi: 10.7554/eLife.62084 (PMC9045820; doi:10.7554/eLife.62084)
Supplement: Figure 4—source data 2. [file elife-62084-fig4-data2.xlsx]

## Sheet: Sheet1
WT				WT
Walled cells				Walled cells
Steady state in 1.2 M				ΔP=-1.2M
N cells	79			N cells	68
N tecnhnical repeats	3			N tecnhnical repeats	3
Normalized intensity (AU)				Normalized intensity (AU)
Time (min)	Mean	SEM (technical repeats)		Time (min)	Mean	SEM (technical repeats)
0	1	0		0	1	0
0.083333	1.03694	0.00694354		0.083333	1.03229	0.0098448
0.166667	1.04965	0.0134819		0.166667	1.04393	0.00993109
0.25	1.05371	0.015657		0.25	1.0579	0.0149322
0.333333	1.06926	0.0235417		0.333333	1.06312	0.00990144
0.416667	1.07411	0.0235419		0.416667	1.06457	0.0168238
0.5	1.08069	0.0243784		0.5	1.07003	0.0137318
0.583333	1.08772	0.0245475		0.583333	1.08143	0.0182381
0.666667	1.0948	0.0230318		0.666667	1.09391	0.0155568
0.75	1.10028	0.0242382		0.75	1.10152	0.0178249
0.833333	1.09755	0.0279576		0.833333	1.09735	0.0156799
0.916667	1.09319	0.0273789		0.916667	1.09183	0.0148584
1	1.09029	0.0269221		1	1.09072	0.0197835
1.08333	1.08656	0.0290472		1.08333	1.09523	0.0188741
1.16667	1.09237	0.032924		1.16667	1.10287	0.0151117
1.25	1.09804	0.0370439		1.25	1.10758	0.00688759
1.33333	1.10279	0.0391012		1.33333	1.11347	0.0114909
1.41667	1.10637	0.0385571		1.41667	1.11509	0.0143864
1.5	1.10764	0.0360822		1.5	1.11463	0.0182561
1.58333	1.11346	0.0390148		1.58333	1.11167	0.0187931
1.66667	1.10638	0.0422746		1.66667	1.10773	0.0260799
1.75	1.1108	0.040456		1.75	1.11351	0.0292486
1.83333	1.10736	0.031923		1.83333	1.10941	0.0275336
1.91667	1.11107	0.0298958		1.91667	1.11615	0.0172185
2	1.1163	0.0303346		2	1.11557	0.0156318
2.08333	1.12061	0.0378045		2.08333	1.1232	0.018882
2.16667	1.12501	0.0437598		2.16667	1.13217	0.0214362
2.25	1.1249	0.0460714		2.25	1.13212	0.0162486
2.33333	1.13154	0.0443343		2.33333	1.13096	0.0178589
2.41667	1.14122	0.0414446		2.41667	1.1235	0.0144636
2.5	1.14495	0.0427528		2.5	1.13174	0.0240893
2.58333	1.1398	0.0370357		2.58333	1.14147	0.0231505
2.66667	1.1335	0.0331415		2.66667	1.14906	0.0318079
2.75	1.1346	0.0332026		2.75	1.15425	0.0314888
2.83333	1.14072	0.0305996		2.83333	1.14758	0.0330939
2.91667	1.15229	0.0303513		2.91667	1.14572	0.0302204
3	1.15807	0.0293428		3	1.16616	0.0216166
3.08333	1.15542	0.0284897		3.08333	1.16677	0.0181748
3.16667	1.14977	0.0286033		3.16667	1.16867	0.0208578
3.25	1.16259	0.0314751		3.25	1.15515	0.0195591
3.33333	1.15953	0.0349122		3.33333	1.15454	0.0224243
3.41667	1.15942	0.0371587		3.41667	1.15299	0.020011
3.5	1.15735	0.0409202		3.5	1.14832	0.0271549
3.58333	1.16198	0.0418885		3.58333	1.15241	0.025905
3.66667	1.16869	0.0419967		3.66667	1.16769	0.0243493
3.75	1.16879	0.0374983		3.75	1.16951	0.0274799
3.83333	1.17132	0.0356258		3.83333	1.16881	0.0232307
3.91667	1.17595	0.0330942		3.91667	1.16608	0.0301182
4	1.17665	0.0328451		4	1.17968	0.0276439
4.08333	1.17724	0.0331907		4.08333	1.18404	0.0297522
4.16667	1.17495	0.0369105		4.16667	1.19606	0.0261328
4.25	1.18821	0.0389443		4.25	1.1908	0.0327796
4.33333	1.19605	0.042215		4.33333	1.19595	0.0339445
4.41667	1.20901	0.0486997		4.41667	1.19297	0.0348964
4.5	1.20232	0.0524546		4.5	1.19321	0.0315021
4.58333	1.19808	0.0526037		4.58333	1.19139	0.0335139
4.66667	1.19479	0.0492753		4.66667	1.19774	0.0345968
4.75	1.19545	0.0428351		4.75	1.20795	0.0346112
4.83333	1.19719	0.0386585		4.83333	1.21306	0.0397513
4.91667	1.20662	0.0390053		4.91667	1.21835	0.0383896
5	1.21081	0.0400607		5	1.21859	0.034055
5.08333	1.2154	0.0448866		5.08333	1.22513	0.0266925
5.16667	1.21361	0.0442399		5.16667	1.23148	0.0304343
5.25	1.22286	0.0409187		5.25	1.23744	0.0361074
5.33333	1.22604	0.0424827		5.33333	1.24226	0.040037
5.41667	1.23571	0.0477676		5.41667	1.24184	0.0371386
5.5	1.23441	0.0486833		5.5	1.24169	0.033794
5.58333	1.23127	0.0494028		5.58333	1.24348	0.0292454
5.66667	1.23043	0.0441073		5.66667	1.2432	0.0409162
5.75	1.23543	0.046549		5.75	1.24805	0.0500234
5.83333	1.23169	0.0409399		5.83333	1.24441	0.048262
5.91667	1.2397	0.0455941		5.91667	1.25581	0.0426208
6	1.24697	0.0457925		6	1.25063	0.0417229
6.08333	1.27031	0.0491691		6.08333	1.2585	0.0454748
6.16667	1.26815	0.0500752		6.16667	1.25583	0.047324
6.25	1.26572	0.0461547		6.25	1.26032	0.0475301
6.33333	1.25298	0.042682		6.33333	1.25815	0.0490007
6.41667	1.25911	0.0397384		6.41667	1.26758	0.0529382
6.5	1.26456	0.0437342		6.5	1.27233	0.0471141
6.58333	1.26847	0.0474716		6.58333	1.2833	0.0520192
6.66667	1.26761	0.0493718		6.66667	1.29856	0.0552915
6.75	1.25963	0.0472731		6.75	1.30609	0.0589351
6.83333	1.26725	0.047425		6.83333	1.30927	0.0577204
6.91667	1.27868	0.0467033		6.91667	1.31257	0.062412
7	1.29049	0.0430758		7	1.31507	0.0680269
7.08333	1.29114	0.0428952		7.08333	1.31792	0.0630886
7.16667	1.29242	0.0400332		7.16667	1.31733	0.0565873
7.25	1.29515	0.0501059		7.25	1.32234	0.0497628
7.33333	1.28844	0.0512673		7.33333	1.32063	0.0565615
7.41667	1.28799	0.0506462		7.41667	1.32393	0.0529137
7.5	1.27793	0.0403218		7.5	1.32803	0.0495905
7.58333	1.28017	0.0418373		7.58333	1.3364	0.0441529
7.66667	1.2856	0.051194		7.66667	1.34382	0.0426093
7.75	1.29345	0.0642607		7.75	1.34074	0.0402637
7.83333	1.30209	0.0664083		7.83333	1.34461	0.0350868
7.91667	1.30605	0.0636244		7.91667	1.34445	0.0370376
8	1.31057	0.0611888		8	1.35052	0.0401675
8.08333	1.3144	0.0565287		8.08333	1.35418	0.0477742
8.16667	1.31966	0.0581337		8.16667	1.36308	0.0447216
8.25	1.32616	0.0538264		8.25	1.35789	0.0405351
8.33333	1.32797	0.0523195		8.33333	1.37176	0.0401022
8.41667	1.33708	0.0506964		8.41667	1.37401	0.0445865
8.5	1.32808	0.0435141		8.5	1.38704	0.0448749
8.58333	1.33003	0.0438022		8.58333	1.38578	0.0452379
8.66667	1.31974	0.0447718		8.66667	1.39661	0.0510024
8.75	1.32499	0.0512375		8.75	1.40344	0.04977
8.83333	1.32693	0.0573718		8.83333	1.4102	0.046276
8.91667	1.34293	0.0515382		8.91667	1.40757	0.0423261
9	1.34572	0.0519012		9	1.40246	0.0483557
9.08333	1.34653	0.0505933		9.08333	1.4078	0.0586436
9.16667	1.34912	0.0529158		9.16667	1.41879	0.0581307
9.25	1.34934	0.0536182		9.25	1.42023	0.0591781
9.33333	1.36472	0.0648005		9.33333	1.42072	0.0596582
9.41667	1.36123	0.0627616		9.41667	1.41362	0.0522399
9.5	1.36211	0.0622049		9.5	1.41854	0.0469636
9.58333	1.3697	0.0598156		9.58333	1.41685	0.0433008
9.66667	1.38298	0.0569637		9.66667	1.42506	0.0508945
9.75	1.3851	0.0565577		9.75	1.43062	0.0548867
9.83333	1.3875	0.0540181		9.83333	1.45028	0.0498819
9.91667	1.38198	0.0564055		9.91667	1.46163	0.0501289
10	1.38162	0.0617494		10	1.47628	0.0359378
