# Supplementary material for: Rapid adaptation of endocytosis, exocytosis, and eisosomes after an acute increase in membrane tension in yeast cells
Source: eLife. 2021 May 13;10:e62084. doi: 10.7554/eLife.62084 (PMC9045820; doi:10.7554/eLife.62084)
Supplement: Figure 4—source data 3. [file elife-62084-fig4-data3.xlsx]

## Sheet: Sheet1
Δpil1				Δpil1
Walled cells				Walled cells
Steady state in 1.2 M				ΔP=-1.2M
N cells	60			N cells	96
N tecnhnical repeats	3			N tecnhnical repeats	3
Normalized intensity (AU)				Normalized intensity (AU)
Time (min)	Mean	SEM (technical repeats)		Time (min)	Mean	SEM (technical repeats)
0	1	0		0	1	0
0.083333	1.03121	0.0143058		0.083333	1.05141	0.0120777
0.166667	1.04426	0.0157838		0.166667	1.06094	0.0181751
0.25	1.04756	0.0171496		0.25	1.05612	0.0205483
0.333333	1.05142	0.0223761		0.333333	1.06281	0.0202922
0.416667	1.05335	0.0240208		0.416667	1.07473	0.0229705
0.5	1.06581	0.0294825		0.5	1.08177	0.0292131
0.583333	1.07726	0.0282616		0.583333	1.07139	0.0358841
0.666667	1.08251	0.0275118		0.666667	1.05422	0.0362201
0.75	1.08586	0.0246663		0.75	1.06539	0.0245711
0.833333	1.08365	0.0219424		0.833333	1.06905	0.0262181
0.916667	1.0862	0.0203831		0.916667	1.07573	0.0380183
1	1.08739	0.0219456		1	1.06909	0.044865
1.08333	1.08816	0.0218726		1.08333	1.07758	0.0482706
1.16667	1.09736	0.0254694		1.16667	1.07433	0.0391758
1.25	1.09946	0.023448		1.25	1.0818	0.0355435
1.33333	1.10207	0.0228532		1.33333	1.07823	0.0365007
1.41667	1.10287	0.0230781		1.41667	1.08837	0.0344579
1.5	1.10195	0.0258345		1.5	1.07984	0.0420874
1.58333	1.10524	0.0279722		1.58333	1.07982	0.0426428
1.66667	1.10274	0.0284594		1.66667	1.08105	0.0424388
1.75	1.10002	0.0263888		1.75	1.08495	0.0344008
1.83333	1.10238	0.0333279		1.83333	1.08429	0.0418923
1.91667	1.10781	0.0336807		1.91667	1.08325	0.0371962
2	1.10988	0.0317874		2	1.09494	0.033596
2.08333	1.11056	0.0285856		2.08333	1.09572	0.0319075
2.16667	1.10966	0.0270191		2.16667	1.10025	0.036618
2.25	1.11379	0.027922		2.25	1.09724	0.0468775
2.33333	1.11736	0.0255489		2.33333	1.10375	0.0413385
2.41667	1.12484	0.0277295		2.41667	1.11324	0.0360035
2.5	1.12491	0.0218729		2.5	1.11882	0.0397179
2.58333	1.12728	0.0192801		2.58333	1.10517	0.0395548
2.66667	1.13008	0.0150042		2.66667	1.0965	0.041751
2.75	1.13606	0.0148031		2.75	1.09637	0.0448964
2.83333	1.1436	0.021625		2.83333	1.11264	0.0523685
2.91667	1.13976	0.0200382		2.91667	1.12127	0.0619475
3	1.1397	0.0243617		3	1.1273	0.0619524
3.08333	1.13647	0.0220829		3.08333	1.12537	0.0529717
3.16667	1.14597	0.02192		3.16667	1.13235	0.0422106
3.25	1.15083	0.0227997		3.25	1.13158	0.0436065
3.33333	1.15719	0.0239925		3.33333	1.13785	0.0313144
3.41667	1.15813	0.0261921		3.41667	1.15523	0.0338554
3.5	1.15652	0.0232891		3.5	1.16414	0.0285768
3.58333	1.15309	0.0181791		3.58333	1.17624	0.0419382
3.66667	1.14968	0.0186387		3.66667	1.16995	0.0377128
3.75	1.14888	0.0188649		3.75	1.17501	0.0343104
3.83333	1.15282	0.025836		3.83333	1.15957	0.0275954
3.91667	1.15186	0.0256688		3.91667	1.15152	0.0405146
4	1.15896	0.0315657		4	1.14654	0.0480621
4.08333	1.15255	0.0350138		4.08333	1.14362	0.0491232
4.16667	1.1582	0.0329984		4.16667	1.15722	0.0379353
4.25	1.15574	0.0279165		4.25	1.15706	0.0384429
4.33333	1.16566	0.0246268		4.33333	1.17207	0.0412599
4.41667	1.16619	0.0317878		4.41667	1.16142	0.0384798
4.5	1.17001	0.0375046		4.5	1.18954	0.0348096
4.58333	1.16637	0.0356486		4.58333	1.21206	0.030419
4.66667	1.16475	0.0304223		4.66667	1.22566	0.0329923
4.75	1.16685	0.0311164		4.75	1.21019	0.0343989
4.83333	1.16991	0.0355781		4.83333	1.19318	0.035409
4.91667	1.17457	0.0379805		4.91667	1.21432	0.0440921
5	1.18098	0.0346869		5	1.21172	0.0492214
5.08333	1.18666	0.0365168		5.08333	1.2161	0.0545008
5.16667	1.18756	0.0386155		5.16667	1.1918	0.0604912
5.25	1.18549	0.0374682		5.25	1.19457	0.0515722
5.33333	1.1877	0.0374962		5.33333	1.19003	0.0515548
5.41667	1.19147	0.0324719		5.41667	1.2031	0.0466082
5.5	1.20084	0.038238		5.5	1.20944	0.0621813
5.58333	1.20614	0.0420043		5.58333	1.21629	0.0621685
5.66667	1.21446	0.0394842		5.66667	1.21022	0.0660541
5.75	1.21046	0.0374986		5.75	1.2193	0.0499697
5.83333	1.21176	0.0374444		5.83333	1.21325	0.0490702
5.91667	1.21032	0.0399998		5.91667	1.23312	0.04149
6	1.21136	0.0372014		6	1.22423	0.0509656
6.08333	1.21567	0.0376941		6.08333	1.24079	0.0638028
6.16667	1.21817	0.0344654		6.16667	1.23463	0.0676496
6.25	1.22398	0.0400711		6.25	1.24057	0.0591276
6.33333	1.22303	0.039477		6.33333	1.24787	0.0482913
6.41667	1.2275	0.0385862		6.41667	1.25127	0.0479945
6.5	1.22861	0.0295788		6.5	1.25299	0.0568055
6.58333	1.22782	0.0267021		6.58333	1.2478	0.0603095
6.66667	1.22582	0.0264122		6.66667	1.25208	0.0611829
6.75	1.22999	0.0328196		6.75	1.2569	0.0575918
6.83333	1.23007	0.0339674		6.83333	1.26377	0.0587194
6.91667	1.23879	0.0333812		6.91667	1.27187	0.0729817
7	1.24089	0.0327236		7	1.27972	0.0776794
7.08333	1.24907	0.025972		7.08333	1.27069	0.0707022
7.16667	1.2558	0.0283221		7.16667	1.26688	0.0713934
7.25	1.25822	0.0283032		7.25	1.25894	0.0702945
7.33333	1.2667	0.0334027		7.33333	1.27619	0.0740617
7.41667	1.26755	0.0292713		7.41667	1.28348	0.0658153
7.5	1.27218	0.0307248		7.5	1.28415	0.0638445
7.58333	1.26021	0.033358		7.58333	1.26796	0.0669077
7.66667	1.26412	0.0359676		7.66667	1.26962	0.0638227
7.75	1.25871	0.0389256		7.75	1.28344	0.0631586
7.83333	1.26621	0.0339597		7.83333	1.28632	0.0655293
7.91667	1.26795	0.034315		7.91667	1.29484	0.0584185
8	1.27788	0.0376408		8	1.28343	0.0613308
8.08333	1.28199	0.0434596		8.08333	1.28946	0.0639664
8.16667	1.28179	0.0457387		8.16667	1.29277	0.0774781
8.25	1.28254	0.0485819		8.25	1.29981	0.0741011
8.33333	1.28632	0.0452101		8.33333	1.30556	0.0768145
8.41667	1.28636	0.0434091		8.41667	1.30137	0.0745178
8.5	1.28597	0.0425852		8.5	1.3119	0.0809481
8.58333	1.27992	0.0413249		8.58333	1.31566	0.076051
8.66667	1.29445	0.0439807		8.66667	1.33622	0.074292
8.75	1.299	0.0418172		8.75	1.35168	0.0602978
8.83333	1.30711	0.0418838		8.83333	1.36838	0.0613829
8.91667	1.29622	0.0414483		8.91667	1.35399	0.0659876
9	1.29847	0.0438337		9	1.33699	0.0851127
9.08333	1.29692	0.0468739		9.08333	1.33623	0.0904822
9.16667	1.29562	0.0415919		9.16667	1.33373	0.0826424
9.25	1.30268	0.0344618		9.25	1.34364	0.0710167
9.33333	1.30894	0.032462		9.33333	1.33594	0.0709696
9.41667	1.3092	0.0428795		9.41667	1.36592	0.0717145
9.5	1.3089	0.0432697		9.5	1.36771	0.0724447
9.58333	1.30615	0.0390334		9.58333	1.36577	0.061956
9.66667	1.3175	0.0344337		9.66667	1.34199	0.0671236
9.75	1.31748	0.0350477		9.75	1.34407	0.0712605
9.83333	1.33011	0.0440682		9.83333	1.35281	0.0806957
9.91667	1.31532	0.0409778		9.91667	1.35421	0.07487
10	1.32209	0.0376617		10	1.36078	0.0764349
