# Supplementary material for: Rapid adaptation of endocytosis, exocytosis, and eisosomes after an acute increase in membrane tension in yeast cells
Source: eLife. 2021 May 13;10:e62084. doi: 10.7554/eLife.62084 (PMC9045820; doi:10.7554/eLife.62084)
Supplement: Figure 4—source data 4. [file elife-62084-fig4-data4.xlsx]

## Sheet: Data 1
Walled cells
Exocytosis rate (%/min)
WT
	Mean	SD	N tecnhnical repeats
Steady-state in 1.2 M	3.1	0.1	3
ΔP=-1.2 M shock	3.2	0.1	3
pil1Δ
	Mean	SD	N tecnhnical repeats
Steady-state in 1.2 M	2.6	0.1	3
ΔP=-1.2 M shock	3.2	0.1	3
