# Supplementary material for: Rapid adaptation of endocytosis, exocytosis, and eisosomes after an acute increase in membrane tension in yeast cells
Source: eLife. 2021 May 13;10:e62084. doi: 10.7554/eLife.62084 (PMC9045820; doi:10.7554/eLife.62084)
Supplement: Figure 4—source data 5. [file elife-62084-fig4-data5.xlsx]

## Sheet: Sheet1
WT				WT
Protoplasts				Protoplasts
Steady state in 0.4 M				ΔP=-0.2M
N cells	20			N cells	37
N tecnhnical repeats	4			N tecnhnical repeats	4
Normalized intensity (AU)				Normalized intensity (AU)
Time (min)	Mean	SEM (technical repeats)		Time (min)	Mean	SEM (technical repeats)
0	1	0		0	1	0
0.083333	1.07045	0.00414617		0.083333	1.06918	0.00922213
0.166667	1.09864	0.00411079		0.166667	1.11035	0.0174477
0.25	1.11644	0.00819086		0.25	1.13667	0.0199336
0.333333	1.12159	0.0095535		0.333333	1.15213	0.0206278
0.416667	1.1256	0.0149336		0.416667	1.15475	0.0230568
0.5	1.12912	0.0158763		0.5	1.16508	0.0264659
0.583333	1.14091	0.0155823		0.583333	1.17868	0.0247109
0.666667	1.1555	0.0143996		0.666667	1.19115	0.0259327
0.75	1.1602	0.0144614		0.75	1.19498	0.0254396
0.833333	1.1665	0.0156891		0.833333	1.20122	0.0263242
0.916667	1.15561	0.0201141		0.916667	1.21279	0.0251522
1	1.16023	0.0211727		1	1.2109	0.0255996
1.08333	1.15624	0.0246461		1.08333	1.21685	0.0326434
1.16667	1.16515	0.0209544		1.16667	1.21431	0.0302536
1.25	1.16953	0.0206357		1.25	1.23341	0.0339146
1.33333	1.16984	0.0216708		1.33333	1.23477	0.0379729
1.41667	1.17525	0.0231652		1.41667	1.24644	0.0414472
1.5	1.17934	0.0225532		1.5	1.25759	0.0476079
1.58333	1.187	0.0204795		1.58333	1.26225	0.0489359
1.66667	1.18873	0.0188231		1.66667	1.26966	0.0561842
1.75	1.19058	0.0196169		1.75	1.27666	0.0550164
1.83333	1.1963	0.0155718		1.83333	1.29456	0.0602436
1.91667	1.20129	0.0157073		1.91667	1.29657	0.061499
2	1.21239	0.0149251		2	1.30411	0.0674107
2.08333	1.21416	0.0204645		2.08333	1.30108	0.0707294
2.16667	1.21484	0.0195829		2.16667	1.30299	0.0672807
2.25	1.21692	0.0176055		2.25	1.30211	0.0650208
2.33333	1.2189	0.0143423		2.33333	1.2949	0.0592467
2.41667	1.2265	0.0147534		2.41667	1.30385	0.063476
2.5	1.23173	0.0117167		2.5	1.3126	0.0658932
2.58333	1.22458	0.0169486		2.58333	1.32684	0.0676008
2.66667	1.22932	0.0156259		2.66667	1.32674	0.0696652
2.75	1.23532	0.018979		2.75	1.32548	0.0695879
2.83333	1.24072	0.0181659		2.83333	1.32484	0.0650557
2.91667	1.24745	0.0178132		2.91667	1.33546	0.0663894
3	1.2542	0.0180958		3	1.34078	0.0652014
3.08333	1.25886	0.0151349		3.08333	1.34484	0.0680526
3.16667	1.26013	0.0159461		3.16667	1.34825	0.0691619
3.25	1.25115	0.0152978		3.25	1.3439	0.0706383
3.33333	1.25794	0.016897		3.33333	1.34641	0.0687824
3.41667	1.25528	0.018926		3.41667	1.34322	0.068328
3.5	1.25689	0.0213615		3.5	1.35092	0.0676916
3.58333	1.25388	0.0206		3.58333	1.34832	0.0663073
3.66667	1.27082	0.0211067		3.66667	1.34823	0.0657229
3.75	1.27981	0.0283737		3.75	1.34685	0.0646991
3.83333	1.27646	0.029885		3.83333	1.3498	0.0700457
3.91667	1.27738	0.0290805		3.91667	1.36335	0.0690086
4	1.27166	0.030317		4	1.36706	0.0635462
4.08333	1.27498	0.0317449		4.08333	1.37314	0.0589503
4.16667	1.27319	0.0365228		4.16667	1.37635	0.0587881
4.25	1.28078	0.0384848		4.25	1.38999	0.0598633
4.33333	1.28978	0.0402392		4.33333	1.39494	0.0584937
4.41667	1.28679	0.038489		4.41667	1.3978	0.0580551
4.5	1.29387	0.0352272		4.5	1.39309	0.0577951
4.58333	1.30635	0.0376677		4.58333	1.39877	0.0565258
4.66667	1.31951	0.0393809		4.66667	1.41185	0.0538191
4.75	1.32252	0.0431136		4.75	1.4299	0.0567863
4.83333	1.31975	0.0418296		4.83333	1.44176	0.0619671
4.91667	1.32206	0.0475538		4.91667	1.44799	0.0597408
5	1.32656	0.0477867		5	1.45935	0.060095
5.08333	1.33166	0.0504659		5.08333	1.45904	0.0549644
5.16667	1.34332	0.0494169		5.16667	1.46938	0.0615397
5.25	1.34528	0.0485475		5.25	1.47144	0.0561936
5.33333	1.34342	0.0485167		5.33333	1.48302	0.0617085
5.41667	1.33859	0.0519227		5.41667	1.49549	0.0630064
5.5	1.34431	0.05317		5.5	1.50023	0.0668371
5.58333	1.35336	0.0535959		5.58333	1.50429	0.065702
5.66667	1.35736	0.0525568		5.66667	1.50439	0.0679982
5.75	1.35956	0.0572381		5.75	1.51906	0.0702365
5.83333	1.36441	0.0628409		5.83333	1.51732	0.0733142
5.91667	1.37011	0.0650765		5.91667	1.53009	0.0719466
6	1.37551	0.0686693		6	1.52082	0.0743496
6.08333	1.37329	0.0639983		6.08333	1.52405	0.0711297
6.16667	1.37968	0.0653617		6.16667	1.51391	0.0678652
6.25	1.3839	0.0639386		6.25	1.51469	0.0663078
6.33333	1.38748	0.0708622		6.33333	1.53166	0.0679515
6.41667	1.38418	0.0737176		6.41667	1.53999	0.0693799
6.5	1.39004	0.076468		6.5	1.53941	0.071404
6.58333	1.39145	0.0748835		6.58333	1.53084	0.0741223
6.66667	1.40274	0.0747763		6.66667	1.54333	0.0674399
6.75	1.39771	0.0678346		6.75	1.54565	0.0644558
6.83333	1.40498	0.0703629		6.83333	1.55133	0.0631219
6.91667	1.41431	0.0685459		6.91667	1.5411	0.0653932
7	1.42795	0.0698569		7	1.55256	0.0643156
7.08333	1.43093	0.0667802		7.08333	1.56958	0.0642286
7.16667	1.43191	0.0727666		7.16667	1.58348	0.0694521
7.25	1.43452	0.0742983		7.25	1.583	0.0681158
7.33333	1.43569	0.0732198		7.33333	1.58286	0.063477
7.41667	1.43284	0.06916		7.41667	1.58632	0.0636381
7.5	1.42955	0.069398		7.5	1.59492	0.0639014
7.58333	1.43483	0.0737074		7.58333	1.59746	0.0700898
7.66667	1.43067	0.0767104		7.66667	1.60264	0.0706395
7.75	1.43453	0.0756174		7.75	1.61216	0.0737781
7.83333	1.44117	0.0756114		7.83333	1.62972	0.0728248
7.91667	1.44718	0.0734397		7.91667	1.6327	0.0722776
8	1.44791	0.0717001		8	1.63033	0.0682284
8.08333	1.44108	0.0704314		8.08333	1.63521	0.0687699
8.16667	1.45161	0.0780175		8.16667	1.63715	0.0639719
8.25	1.45711	0.077516		8.25	1.65106	0.0643742
8.33333	1.45269	0.0776464		8.33333	1.6352	0.0638389
8.41667	1.44388	0.0746384		8.41667	1.64171	0.0673272
8.5	1.44411	0.0777853		8.5	1.63596	0.0641795
8.58333	1.44698	0.0791887		8.58333	1.65104	0.0585084
8.66667	1.45893	0.0766373		8.66667	1.65499	0.0632268
8.75	1.46518	0.0751358		8.75	1.65703	0.0595306
8.83333	1.47556	0.0723123		8.83333	1.65721	0.0616059
8.91667	1.47195	0.073328		8.91667	1.66402	0.0568508
9	1.46527	0.0746974		9	1.67836	0.0600354
9.08333	1.46562	0.0820826		9.08333	1.68977	0.0689364
9.16667	1.47053	0.0850749		9.16667	1.69147	0.0676139
9.25	1.47327	0.089788		9.25	1.68992	0.0668741
9.33333	1.46434	0.0940263		9.33333	1.68025	0.061183
9.41667	1.46328	0.0969833		9.41667	1.68306	0.0643118
9.5	1.45937	0.0983717		9.5	1.68248	0.0661514
9.58333	1.4639	0.096785		9.58333	1.68844	0.0719166
9.66667	1.47546	0.0927947		9.66667	1.68489	0.0733832
9.75	1.48276	0.088854		9.75	1.69516	0.0762825
9.83333	1.48799	0.0921204		9.83333	1.70979	0.0774274
9.91667	1.48284	0.093277		9.91667	1.71844	0.0787747
10	1.47566	0.103583		10	1.71551	0.0899399
