# Supplementary material for: Rapid adaptation of endocytosis, exocytosis, and eisosomes after an acute increase in membrane tension in yeast cells
Source: eLife. 2021 May 13;10:e62084. doi: 10.7554/eLife.62084 (PMC9045820; doi:10.7554/eLife.62084)
Supplement: Figure 4—source data 6. [file elife-62084-fig4-data6.xlsx]

## Sheet: Sheet1
Δpil1				Δpil1
Protoplasts				Protoplasts
Steady state in 0.4 M				ΔP=-0.05 M
N cells	44			N cells	60
N tecnhnical repeats	4			N tecnhnical repeats	4
Normalized intensity (AU)				Normalized intensity (AU)
Time (min)	Mean	SEM (technical repeats)		Time (min)	Mean	SEM (technical repeats)
0	1	0		0	1	0
0.083333	1.06025	0.0100978		0.083333	1.06506	0.00775944
0.166667	1.09414	0.0131338		0.166667	1.09342	0.0100002
0.25	1.11895	0.0133298		0.25	1.11539	0.0090615
0.333333	1.13482	0.0122507		0.333333	1.13187	0.0112727
0.416667	1.14215	0.0111432		0.416667	1.14552	0.0130044
0.5	1.14871	0.0130973		0.5	1.15901	0.0217347
0.583333	1.15427	0.0119512		0.583333	1.16695	0.0218816
0.666667	1.16257	0.0163045		0.666667	1.1778	0.0267578
0.75	1.16869	0.0145046		0.75	1.1866	0.0285752
0.833333	1.17516	0.0170044		0.833333	1.18306	0.0295202
0.916667	1.18747	0.0216179		0.916667	1.18831	0.0329014
1	1.19468	0.0220059		1	1.19588	0.0340436
1.08333	1.20264	0.0232219		1.08333	1.21002	0.0397016
1.16667	1.20927	0.021944		1.16667	1.21845	0.0398815
1.25	1.20507	0.0187265		1.25	1.2252	0.0426199
1.33333	1.20844	0.0196112		1.33333	1.22758	0.0461081
1.41667	1.21142	0.0204632		1.41667	1.22856	0.0494704
1.5	1.22533	0.0235463		1.5	1.2342	0.0502358
1.58333	1.22753	0.0233409		1.58333	1.23905	0.0550147
1.66667	1.23141	0.0224748		1.66667	1.24729	0.0549442
1.75	1.23527	0.0227103		1.75	1.2485	0.0584163
1.83333	1.24065	0.0225861		1.83333	1.25084	0.0585852
1.91667	1.24354	0.0213577		1.91667	1.26033	0.061401
2	1.24605	0.0213225		2	1.2676	0.0616084
2.08333	1.24849	0.0204818		2.08333	1.27028	0.0621363
2.16667	1.25834	0.0241429		2.16667	1.27056	0.0608773
2.25	1.2622	0.0233538		2.25	1.27931	0.0671646
2.33333	1.27148	0.0281489		2.33333	1.28434	0.0698447
2.41667	1.27783	0.0272564		2.41667	1.28691	0.0703738
2.5	1.284	0.028388		2.5	1.2898	0.0719052
2.58333	1.2878	0.0284609		2.58333	1.29546	0.0713399
2.66667	1.29027	0.0310251		2.66667	1.30584	0.0814656
2.75	1.29407	0.0311832		2.75	1.30788	0.0839694
2.83333	1.30512	0.030427		2.83333	1.31635	0.0845247
2.91667	1.31119	0.0297068		2.91667	1.32024	0.0837305
3	1.31382	0.0295455		3	1.32824	0.0844504
3.08333	1.31126	0.0298016		3.08333	1.33075	0.0804717
3.16667	1.31085	0.0288147		3.16667	1.34046	0.0811418
3.25	1.32144	0.0300736		3.25	1.34032	0.0767863
3.33333	1.3257	0.0291086		3.33333	1.34094	0.0797442
3.41667	1.32915	0.0288356		3.41667	1.34635	0.0824858
3.5	1.33845	0.0330786		3.5	1.34545	0.0803845
3.58333	1.34291	0.0358731		3.58333	1.35479	0.0855774
3.66667	1.34237	0.0334813		3.66667	1.35873	0.0846131
3.75	1.34266	0.0296341		3.75	1.37437	0.0873034
3.83333	1.34306	0.0286135		3.83333	1.37554	0.0874084
3.91667	1.34876	0.0267465		3.91667	1.37375	0.0838815
4	1.36746	0.0344026		4	1.37237	0.0819902
4.08333	1.37641	0.039179		4.08333	1.38579	0.082919
4.16667	1.3827	0.0390336		4.16667	1.39817	0.0814313
4.25	1.37093	0.0330069		4.25	1.40764	0.0885613
4.33333	1.36991	0.0294198		4.33333	1.40242	0.0844813
4.41667	1.37372	0.0284051		4.41667	1.40923	0.0880285
4.5	1.38391	0.0322583		4.5	1.41406	0.0884942
4.58333	1.39654	0.0385596		4.58333	1.42462	0.101449
4.66667	1.39733	0.0394543		4.66667	1.42536	0.09928
4.75	1.39887	0.0359362		4.75	1.43459	0.0955246
4.83333	1.39692	0.0330039		4.83333	1.43005	0.0914409
4.91667	1.40337	0.0339622		4.91667	1.43952	0.0991362
5	1.41227	0.0355373		5	1.44163	0.10098
5.08333	1.41786	0.0361472		5.08333	1.45097	0.0969782
5.16667	1.41767	0.0344339		5.16667	1.46569	0.0878721
5.25	1.41414	0.0337777		5.25	1.46886	0.0867446
5.33333	1.40897	0.0318206		5.33333	1.47594	0.0915112
5.41667	1.41293	0.0340642		5.41667	1.46919	0.091966
5.5	1.4194	0.0353649		5.5	1.47112	0.0941378
5.58333	1.41712	0.0342742		5.58333	1.47012	0.0925221
5.66667	1.42503	0.0352784		5.66667	1.48916	0.102276
5.75	1.42364	0.0336995		5.75	1.48944	0.102856
5.83333	1.42942	0.0348232		5.83333	1.50367	0.100938
5.91667	1.4289	0.0316306		5.91667	1.49901	0.0972379
6	1.43811	0.0390383		6	1.50502	0.102691
6.08333	1.44242	0.0433491		6.08333	1.50339	0.101001
6.16667	1.45513	0.0450951		6.16667	1.50922	0.102163
6.25	1.45116	0.0390422		6.25	1.51868	0.0968858
6.33333	1.45458	0.0388655		6.33333	1.52894	0.105129
6.41667	1.4459	0.0360905		6.41667	1.52275	0.101912
6.5	1.45482	0.0480749		6.5	1.52152	0.102092
6.58333	1.46354	0.0471073		6.58333	1.51655	0.102253
6.66667	1.47324	0.0480021		6.66667	1.51843	0.108551
6.75	1.47229	0.0396371		6.75	1.52578	0.111667
6.83333	1.47142	0.0372893		6.83333	1.53747	0.109399
6.91667	1.47099	0.0363705		6.91667	1.55285	0.112739
7	1.47519	0.0421235		7	1.55809	0.111086
7.08333	1.47484	0.0469503		7.08333	1.55169	0.110939
7.16667	1.47371	0.0459338		7.16667	1.54955	0.100056
7.25	1.47943	0.0456225		7.25	1.56334	0.102202
7.33333	1.48385	0.0442212		7.33333	1.5674	0.0937459
7.41667	1.49034	0.0397138		7.41667	1.57143	0.0919305
7.5	1.492	0.0426393		7.5	1.56825	0.083594
7.58333	1.49723	0.0460626		7.58333	1.58816	0.100247
7.66667	1.50387	0.0516158		7.66667	1.59921	0.0989612
7.75	1.50199	0.0487131		7.75	1.60797	0.101777
7.83333	1.50367	0.0421358		7.83333	1.60106	0.092236
7.91667	1.50342	0.0427351		7.91667	1.61374	0.100875
8	1.51352	0.0468859		8	1.60124	0.0988923
8.08333	1.518	0.0500792		8.08333	1.60411	0.0967255
8.16667	1.53218	0.0575198		8.16667	1.59738	0.0949989
8.25	1.5311	0.0550398		8.25	1.61232	0.10154
8.33333	1.53204	0.0556844		8.33333	1.61392	0.0989255
8.41667	1.53272	0.052697		8.41667	1.62218	0.0965384
8.5	1.546	0.0609108		8.5	1.61479	0.0933442
8.58333	1.5568	0.0600114		8.58333	1.61709	0.0976672
8.66667	1.56556	0.0627415		8.66667	1.61982	0.100711
8.75	1.56058	0.05973		8.75	1.62447	0.101498
8.83333	1.55974	0.0616273		8.83333	1.63143	0.107842
8.91667	1.55696	0.0553454		8.91667	1.62755	0.101925
9	1.57075	0.0572719		9	1.6274	0.103204
9.08333	1.57138	0.0529991		9.08333	1.62571	0.0929817
9.16667	1.57881	0.0577236		9.16667	1.62868	0.100298
9.25	1.57967	0.0587478		9.25	1.6286	0.101097
9.33333	1.58458	0.0667006		9.33333	1.63646	0.108412
9.41667	1.58384	0.068097		9.41667	1.63551	0.101464
9.5	1.583	0.0658767		9.5	1.64149	0.102076
9.58333	1.58353	0.0577303		9.58333	1.6348	0.09424
9.66667	1.5995	0.0668571		9.66667	1.63721	0.0986249
9.75	1.59174	0.0650706		9.75	1.63088	0.0942801
9.83333	1.59088	0.0709713		9.83333	1.63973	0.0969823
9.91667	1.58887	0.0662395		9.91667	1.64603	0.0994992
10	1.59169	0.0641501		10	1.65682	0.103287
