# Supplementary material for: Rapid adaptation of endocytosis, exocytosis, and eisosomes after an acute increase in membrane tension in yeast cells
Source: eLife. 2021 May 13;10:e62084. doi: 10.7554/eLife.62084 (PMC9045820; doi:10.7554/eLife.62084)
Supplement: Figure 4—source data 7. [file elife-62084-fig4-data7.xlsx]

## Sheet: Data 1
Protoplasts
Exocytosis rate (%/min)
WT
	Mean	SD	N tecnhnical repeats
Steady-state in 0.4 M	4.4	0.2	4
ΔP=-0.2 M shock	6.2	0.4	4
pil1Δ
	Mean	SD	N tecnhnical repeats
Steady-state in 0.4 M	6.2	0.4	4
ΔP=-0.05 M shock	6.8	0.5	4
