# Supplementary material for: Rapid adaptation of endocytosis, exocytosis, and eisosomes after an acute increase in membrane tension in yeast cells
Source: eLife. 2021 May 13;10:e62084. doi: 10.7554/eLife.62084 (PMC9045820; doi:10.7554/eLife.62084)
Supplement: Figure 5—source data 1. [file elife-62084-fig5-data1.xlsx]

## Sheet: Sheet1
Protoplast
pil1Δ
Initially at steady state in 0.4M followed by a =-0.2M shock
% Survival
	Control			BFA			LatA
	N cells	114		N cells	83		N cells	70
Time (min)	Mean	SEM		Mean	SEM		Mean	SEM
0	100			100			100
2	97.8417	1.23256		90.5172	2.72022		89.4118	3.33733
4	94.2446	1.97542		84.4828	3.36173		88.2353	3.49464
6	92.8058	2.19166		78.4483	3.81772		88.2353
8	87.0504	2.84778		75	4.02042		85.8506	3.78522
10	82.0144	3.25762		71.5517	4.18899		82.2734	4.15287
