# Supplementary material for: Rapid adaptation of endocytosis, exocytosis, and eisosomes after an acute increase in membrane tension in yeast cells
Source: eLife. 2021 May 13;10:e62084. doi: 10.7554/eLife.62084 (PMC9045820; doi:10.7554/eLife.62084)
Supplement: Figure 6—source data 1. [file elife-62084-fig6-data1.xlsx]

## Sheet: # molecules
Field 1				Field 2				Field 3				Field 4
WT				WT				WT				WT
Walled cells				Walled cells				Walled cells				Walled cells
N=	64			N=	79			N=	91			N=	202
Number of molecules (#)				Number of molecules (#)				Number of molecules (#)				Number of molecules (#)
time	mean	stdev		time	mean	stdev		time	mean	stdev		time	mean	stdev
-8.37	162.003	75.3535		-8.091	123.857	33.9428		-6.975	151.081	56.8953		-7.719	139.277	49.4073
-8.277	158.288	80.7475		-7.998	132.148	34.2077		-6.882	152.285	57.1598		-7.626	143.663	50.2006
-8.184	160.46	81.7625		-7.905	138.191	35.3621		-6.789	166.197	64.0948		-7.533	152.413	52.44
-8.091	166.584	86.0901		-7.812	144.233	36.5906		-6.696	170.413	61.9584		-7.44	155.812	53.9419
-7.998	167.201	88.0155		-7.719	147.304	33.8689		-6.603	177.905	63.1012		-7.347	154.837	55.6431
-7.905	165.343	87.2844		-7.626	161.535	57.8382		-6.51	186.566	62.4007		-7.254	163.849	62.9694
-7.812	169.908	87.9983		-7.533	169.351	58.4972		-6.417	195.645	62.6068		-7.161	169.823	64.9273
-7.719	174.01	85.8431		-7.44	173.075	58.2416		-6.324	202.995	64.3599		-7.068	174.569	65.5033
-7.626	173.029	83.007		-7.347	175.058	60.0778		-6.231	209.618	64.7656		-6.975	177.866	66.0465
-7.533	168.5	79.0221		-7.254	183.71	61.1422		-6.138	208.969	68.0664		-6.882	185.635	66.8071
-7.44	174.784	77.0869		-7.161	188.117	64.184		-6.045	214.536	69.6741		-6.789	191.269	69.1485
-7.347	182.224	77.2637		-7.068	197.396	65.1161		-5.952	223.977	70.4403		-6.696	197.233	70.8381
-7.254	185.129	76.6591		-6.975	202.058	68.5959		-5.859	232.329	70.3897		-6.603	200.428	72.8119
-7.161	192.684	77.1405		-6.882	208.326	69.9758		-5.766	238.186	71.0159		-6.51	206.151	73.9528
-7.068	196.067	79.5823		-6.789	214.94	69.5315		-5.673	250.199	72.4078		-6.417	212.916	73.6603
-6.975	197.515	81.558		-6.696	217.046	70.2737		-5.58	257.507	74.0266		-6.324	217.222	75.2113
-6.882	205.095	82.4535		-6.603	223.632	72.3372		-5.487	264.902	74.9796		-6.231	224.871	77.4606
-6.789	208.666	84.4423		-6.51	228.07	77.382		-5.394	272.977	77.3754		-6.138	230.777	77.8301
-6.696	209.743	86.0751		-6.417	237.661	76.521		-5.301	279.929	79.8824		-6.045	239.033	78.9252
-6.603	212.534	86.2797		-6.324	244.683	78.0059		-5.208	289.261	80.0395		-5.952	246.351	79.7999
-6.51	211.21	88.3079		-6.231	244.722	86.0233		-5.115	299.55	81.0237		-5.859	252.375	81.7623
-6.417	216.884	90.2617		-6.138	254.4	87.6625		-5.022	310.398	81.583		-5.766	258.835	84.5224
-6.324	225.067	92.051		-6.045	262.159	89.302		-4.929	321.712	83.6858		-5.673	264.265	87.5214
-6.231	229.982	95.3855		-5.952	271.808	91.1602		-4.836	332.982	84.3938		-5.58	273.788	88.811
-6.138	234.613	95.821		-5.859	280.64	92.2501		-4.743	344.442	84.8335		-5.487	282.491	90.242
-6.045	242.637	96.4611		-5.766	281.112	97.1809		-4.65	354.294	85.9542		-5.394	288.86	92.4736
-5.952	245.683	100.539		-5.673	285.031	102.422		-4.557	363.482	88.5066		-5.301	297.608	94.926
-5.859	254.748	102.962		-5.58	295.688	104.37		-4.464	375.005	89.4657		-5.208	306.719	96.1639
-5.766	261.207	105.114		-5.487	305.229	105.624		-4.371	384.88	91.2151		-5.115	316.901	96.4311
-5.673	270.683	106.32		-5.394	316.126	105.127		-4.278	396.667	92.3314		-5.022	327.803	97.4397
-5.58	275.977	108.151		-5.301	327.141	107.293		-4.185	408.688	93.5091		-4.929	333.393	100.976
-5.487	285.344	109.275		-5.208	326.894	113.402		-4.092	418.33	96.5054		-4.836	344.337	102.186
-5.394	294.895	110.441		-5.115	337.992	114.979		-3.999	430.214	97.9474		-4.743	355.272	103.525
-5.301	305.448	110.865		-5.022	346.742	117.19		-3.906	442.091	99.5452		-4.65	366.354	104.841
-5.208	314.464	111.454		-4.929	358.177	118.792		-3.813	453.907	100.189		-4.557	377.407	106
-5.115	325.151	112.483		-4.836	376.405	131.482		-3.72	466.341	101.69		-4.464	388.455	107.645
-5.022	332.436	115.485		-4.743	385.132	133.302		-3.627	478.005	103.26		-4.371	396.132	111.426
-4.929	342.94	116.665		-4.65	396.343	134.753		-3.534	490.663	105.07		-4.278	405.628	114.509
-4.836	353.501	117.985		-4.557	407.012	135.342		-3.441	503.57	107.022		-4.185	417.029	115.723
-4.743	364.115	119.026		-4.464	416.722	136.159		-3.348	516.721	109.449		-4.092	427.894	116.274
-4.65	374.631	119.959		-4.371	426.113	137.27		-3.255	529.914	111.954		-3.999	438.992	117.483
-4.557	381.636	121.606		-4.278	436.703	138.908		-3.162	543.948	113.647		-3.906	444.987	123.611
-4.464	391.797	121.634		-4.185	447.557	140.274		-3.069	558.146	115.531		-3.813	456.307	124.714
-4.371	401.572	121.421		-4.092	458.307	141.889		-2.976	572	116.915		-3.72	468.381	125.876
-4.278	408.292	122.054		-3.999	468.805	143.618		-2.883	585.902	118.671		-3.627	480.155	127.428
-4.185	417.589	121.662		-3.906	481.145	143.953		-2.79	599.703	120.404		-3.534	492.191	129.038
-4.092	427.012	121.248		-3.813	486.584	147.053		-2.697	613.287	122.354		-3.441	504.474	131.146
-3.999	436.616	120.927		-3.72	498.068	148.003		-2.604	626.793	124.546		-3.348	516.92	133.471
-3.906	446.051	119.354		-3.627	509.651	149.109		-2.511	640.276	126.936		-3.255	529.472	135.887
-3.813	455.763	119.065		-3.534	521.329	150.13		-2.418	653.511	128.988		-3.162	542.256	138.262
-3.72	466.086	118.841		-3.441	532.865	151.379		-2.325	667.004	131.021		-3.069	556.584	141.027
-3.627	474.161	121.375		-3.348	542.801	152.958		-2.232	674.451	143.449		-2.976	569.803	142.401
-3.534	485.576	122.542		-3.255	554.956	154.483		-2.139	687.437	145.16		-2.883	583.43	144.182
-3.441	497.287	123.901		-3.162	567.164	156.14		-2.046	700.631	146.568		-2.79	597.154	146.105
-3.348	509.699	125.461		-3.069	579.401	157.955		-1.953	713.243	146.746		-2.697	611.054	148.108
-3.255	522.184	127.11		-2.976	591.55	159.862		-1.86	725.661	146.666		-2.604	624.929	150.342
-3.162	534.594	128.977		-2.883	602.993	161.367		-1.767	737.481	147.015		-2.511	636.982	154.364
-3.069	546.807	131.184		-2.79	614.212	161.919		-1.674	749.157	147.52		-2.418	651.047	156.093
-2.976	559.449	133.522		-2.697	625.535	163.882		-1.581	760.589	148.128		-2.325	665.088	157.994
-2.883	571.866	135.628		-2.604	637.306	165.871		-1.488	771.461	148.576		-2.232	679.06	159.916
-2.79	584.992	138.07		-2.511	649.139	167.911		-1.395	781.263	149.317		-2.139	692.501	161.596
-2.697	596.945	139.176		-2.418	656.698	171.268		-1.302	784.247	158.767		-2.046	705.343	163.523
-2.604	609.062	140.305		-2.325	666.265	172.339		-1.209	792.757	160.486		-1.953	718.057	165.518
-2.511	620.936	141.635		-2.232	676.474	173.302		-1.116	800.191	162.256		-1.86	730.245	167.244
-2.418	632.287	142.743		-2.139	687.329	175.606		-1.023	806.466	163.501		-1.767	742.104	169.085
-2.325	643.71	144.275		-2.046	697.878	178.193		-0.93	812.105	165.001		-1.674	753.471	171.055
-2.232	663.285	158.372		-1.953	708.299	179.844		-0.837	818.098	166.221		-1.581	761.935	174.579
-2.139	674.983	160.188		-1.86	718.351	181.796		-0.744	823.536	167.443		-1.488	772.054	176.668
-2.046	686.632	162.278		-1.767	728.32	183.446		-0.651	828.25	168.249		-1.395	781.554	178.72
-1.953	697.872	164.582		-1.674	736.942	183.866		-0.558	832.241	167.971		-1.302	790.387	180.619
-1.86	708.452	167.079		-1.581	745.315	184.367		-0.465	835.375	168.015		-1.209	798.446	182.214
-1.767	719.119	170.01		-1.488	748.857	188.839		-0.372	837.705	168.287		-1.116	805.095	182.745
-1.674	729.464	173.18		-1.395	752.888	192.048		-0.279	839.035	168.002		-1.023	811.401	183.551
-1.581	739.729	176.109		-1.302	760.952	193.319		-0.186	840.561	168.07		-0.93	816.959	184.18
-1.488	749.546	178.812		-1.209	768.678	194.809		-0.093	841.178	167.132		-0.837	822.099	184.799
-1.395	758.146	181.229		-1.116	771.939	197.761		0	841.586	166.196		-0.744	826.569	185.793
-1.302	766.133	182.448		-1.023	776.702	196.56		0.093	840.871	165.864		-0.651	820.986	197.992
-1.209	773.645	183.978		-0.93	781.818	196.045		0.186	839.968	165.756		-0.558	823.845	198.38
-1.116	780.809	185.494		-0.837	786.848	195.983		0.279	839.017	165.944		-0.465	826.42	198.76
-1.023	787.234	187.118		-0.744	791.684	196.19		0.372	837.791	166.316		-0.372	828.595	198.614
-0.93	792.285	187.049		-0.651	796.227	196.835		0.465	836.476	166.488		-0.279	830.26	198.49
-0.837	796.433	188.162		-0.558	799.724	196.909		0.558	834.22	166.965		-0.186	831.019	198.436
-0.744	798.791	188.241		-0.465	802.484	197.083		0.651	832.515	167.609		-0.093	831.592	198.4
-0.651	802.166	189.492		-0.372	804.723	197.611		0.744	829.939	168		0	831.773	198.433
-0.558	805.249	190.811		-0.279	806.864	198.311		0.837	827.097	167.479		0.093	831.443	198.365
-0.465	808.488	191.996		-0.186	810.692	199.893		0.93	822.684	167.491		0.186	830.594	198.404
-0.372	811.423	194.095		-0.093	811.779	200.694		1.023	819.249	166.646		0.279	828.94	198.096
-0.279	813.991	196.005		0	812.061	201.569		1.116	815.498	165.742		0.372	827.136	198.072
-0.186	816.148	197.933		0.093	811.791	202.504		1.209	811.55	165.125		0.465	824.806	198.219
-0.093	817.568	199.315		0.186	811.095	203.309		1.302	807.328	164.564		0.558	822.15	198.289
0	818.086	200.364		0.279	809.971	203.996		1.395	802.712	164.196		0.651	818.814	198.14
0.093	817.716	200.564		0.372	808.277	204.253		1.488	796.976	163.261		0.744	813.254	198.332
0.186	816.955	200.731		0.465	805.997	204.957		1.581	790.719	162.353		0.837	808.953	197.91
0.279	816.031	201.099		0.558	803.187	205.902		1.674	784.114	161.044		0.93	804.397	197.618
0.372	814.857	201.265		0.651	799.978	206.846		1.767	777.062	159.849		1.023	799.797	197.585
0.465	812.899	201.222		0.744	799.331	207.818		1.86	769.64	158.652		1.116	794.946	197.742
0.558	810.317	201.801		0.837	794.798	207.473		1.953	762.457	158.752		1.209	783.462	206.047
0.651	807.602	202.564		0.93	789.713	207.393		2.046	755.333	158.07		1.302	778.297	205.641
0.744	804.677	203.405		1.023	784.365	207.183		2.139	748.259	157.111		1.395	773.237	205.474
0.837	800.62	204.197		1.116	778.859	206.832		2.232	742.309	156.644		1.488	767.907	205.236
0.93	795.554	203.997		1.209	775.984	206.791		2.325	734.396	155.509		1.581	762.526	205.069
1.023	789.623	202.238		1.302	769.696	205.49		2.418	727.053	156.032		1.674	755.539	204.08
1.116	783.659	200.592		1.395	763.332	204.19		2.511	720.062	155.825		1.767	748.813	202.67
1.209	777.111	199.077		1.488	757.222	202.883		2.604	712.83	155.659		1.86	742.024	201.198
1.302	770.667	197.792		1.581	751.295	201.769		2.697	704.758	154.286		1.953	735.133	199.84
1.395	763.674	196.468		1.674	751.209	195.282		2.79	695.491	153.372		2.046	729.681	197.653
1.488	757.336	194.514		1.767	744.783	193.157		2.883	687.563	151.758		2.139	722.208	196.165
1.581	750.662	192.62		1.86	738.353	190.677		2.976	679.364	150.234		2.232	714.603	194.738
1.674	743.954	190.837		1.953	732.195	188.359		3.069	670.761	148.883		2.325	706.745	193.391
1.767	737.304	188.554		2.046	725.61	185.829		3.162	661.963	147.037		2.418	698.769	192.183
1.86	731.06	186.051		2.139	718.821	183.412		3.255	653.464	145.083		2.511	690.521	190.968
1.953	724.504	183.481		2.232	711.768	181.537		3.348	644.102	142.496		2.604	682.126	189.185
2.046	717.943	181.065		2.325	704.624	179.785		3.441	634.66	140.067		2.697	673.568	187.61
2.139	711.28	178.78		2.418	697.27	178.226		3.534	625.012	137.64		2.79	664.789	186.159
2.232	704.272	176.251		2.511	689.516	176.725		3.627	615.792	135.268		2.883	655.998	184.857
2.325	693.779	173.119		2.604	681.583	175.085		3.72	606.428	133.202		2.976	649.351	181.892
2.418	685.948	171.472		2.697	673.59	173.519		3.813	596.446	132.205		3.069	639.446	180.375
2.511	678.134	169.738		2.79	665.587	172.421		3.906	587.262	130.84		3.162	630.91	178.327
2.604	670.316	168.207		2.883	657.01	171.281		3.999	578.343	129.489		3.255	622.53	176.165
2.697	662.377	166.691		2.976	648.436	170.362		4.092	571.167	128.216		3.348	614.169	174.156
2.79	648.413	160.452		3.069	639.824	169.626		4.185	567.308	125.901		3.441	605.028	171.868
2.883	639.83	159.78		3.162	631.171	170.953		4.278	559.327	125.587		3.534	595.381	170.682
2.976	631.194	159.121		3.255	622.178	170.298		4.371	550.724	124.839		3.627	587.255	168.752
3.069	622.848	158.27		3.348	613.008	169.762		4.464	542.376	124.082		3.72	579.259	166.959
3.162	614.662	157.487		3.441	604.172	169.26		4.557	533.19	122.221		3.813	571.301	165.245
3.255	606.474	156.642		3.534	588.587	159.41		4.65	523.695	120.513		3.906	565.593	162.708
3.348	598.501	155.699		3.627	579.544	157.719		4.743	516.214	117.541		3.999	557.286	161.22
3.441	590.411	154.538		3.72	570.14	156.614		4.836	506.475	115.57		4.092	548.885	159.812
3.534	582.597	153.504		3.813	561.201	154.446		4.929	496.904	113.773		4.185	540.236	158.516
3.627	573.989	153.914		3.906	552.538	152.304		5.022	487.402	112.208		4.278	530.623	157.024
3.72	565.776	153.414		3.999	543.812	150.267		5.115	478.273	110.559		4.371	521.872	155.636
3.813	560.058	151.081		4.092	535.127	148.311		5.208	469.042	109.05		4.464	512.309	153.814
3.906	551.387	149.426		4.185	526.316	146.56		5.301	459.526	107.036		4.557	503.271	151.797
3.999	542.358	149.144		4.278	518.663	145.583		5.394	450.102	104.971		4.65	494.286	149.739
4.092	533.221	147.736		4.371	510.235	143.959		5.487	441.635	103.502		4.743	485.107	148.218
4.185	523.931	146.482		4.464	501.404	142.526		5.58	435.029	101.746		4.836	478.267	145.893
4.278	514.367	145.424		4.557	495.298	141.689		5.673	427.466	101.344		4.929	469.679	144.157
4.371	504.863	144.728		4.65	487.598	141.119		5.766	419.498	100.589		5.022	461.141	142.496
4.464	494.881	143.871		4.743	479.725	140.826		5.859	411.409	100.116		5.115	452.76	140.913
4.557	485.313	141.681		4.836	471.679	141.389		5.952	403.424	100.055		5.208	444.721	139.577
4.65	475.6	140.989		4.929	463.653	141.015		6.045	400.371	96.6781		5.301	438.238	136.593
4.743	466.444	141.041		5.022	459.194	136.519		6.138	393.675	96.5776		5.394	431.468	135.506
4.836	457.359	140.089		5.115	451.327	134.543		6.231	386.042	96.7591		5.487	423.213	134.086
4.929	448.81	139.283		5.208	443.41	132.71		6.324	378.928	97.0551		5.58	415.058	132.609
5.022	440.821	139.914		5.301	435.327	130.846		6.417	371.205	96.285		5.673	406.778	131.124
5.115	432.908	139.06		5.394	427.573	128.994		6.51	365.74	94.5549		5.766	402.801	125.906
5.208	425.481	138.015		5.487	418.556	127.558		6.603	358.616	94.2817		5.859	394.875	125.514
5.301	418.423	137.162		5.58	410.615	125.952		6.696	350.817	93.3744		5.952	386.48	124.31
5.394	411.526	136.448		5.673	402.946	124.32		6.789	343.225	92.4408		6.045	378.49	123.379
5.487	405.519	137.437		5.766	396.298	125.351		6.882	335.387	91.2843		6.138	370.155	122.655
5.58	398.964	136.726		5.859	388.595	123.933		6.975	327.612	90.2895		6.231	361.82	121.287
5.673	392.585	135.271		5.952	383.565	122.7		7.068	314.451	86.6715		6.324	355.561	119.499
5.766	386.862	134.804		6.045	375.751	121.565		7.161	307.009	85.7256		6.417	347.814	118.034
5.859	380.108	134.478		6.138	368.736	121.41		7.254	299.464	84.1977		6.51	340.459	117.197
5.952	373.207	132.944		6.231	360.889	120.579		7.347	292.478	83.2551		6.603	333.852	116.182
6.045	372.753	129.375		6.324	353.035	119.9		7.44	285.837	77.868		6.696	326.162	115.116
6.138	365.399	127.963		6.417	344.895	119.075		7.533	281.875	73.9017		6.789	323.311	112.005
6.231	357.602	126.27		6.51	337.414	118.007		7.626	275.036	72.965		6.882	315.852	110.81
6.324	349.613	124.684		6.603	329.88	117.067		7.719	270.449	70.7385		6.975	310.746	109.8
6.417	341.397	121.561		6.696	322.364	116.301		7.812	260.404	66.1629		7.068	303.666	109.13
6.51	340.329	115.121		6.789	315.118	115.509		7.905	253.965	65.6935		7.161	298.962	106.639
6.603	341.013	110.886		6.882	304.236	114.972		7.998	246.593	60.8929		7.254	294.396	105.163
6.696	331.931	108.054		6.975	299.662	112.49		8.091	240.112	61.3601		7.347	287.183	103.867
6.789	322.783	105.432		7.068	292.796	110.511		8.184	236.489	59.1665		7.44	279.695	102.247
6.882	310.713	102.379		7.161	285.932	108.556		8.277	232.244	55.7246		7.533	277.812	99.7931
6.975	301.426	99.908		7.254	278.91	106.814		8.37	225.476	54.2225		7.626	270.275	98.238
7.068	297.006	98.4767		7.347	279.859	106.677		8.463	219.164	53.3962		7.719	266.147	95.6795
7.161	288.096	96.4551		7.44	273.022	105.394		8.556	213.107	52.9198		7.812	258.556	93.7498
7.254	280.034	95.6909		7.533	266.401	105.303		8.649	208.541	52.0744		7.905	251.389	92.251
7.347	283.679	92.3432		7.626	263.26	104.535		8.742	201.606	50.3454		7.998	246.996	87.8095
7.44	275.776	91.941		7.719	256.251	103.647		8.835	195.02	49.2052		8.091	239.444	86.3117
7.533	283.647	86.3751		7.812	255.109	104.101		8.928	192.774	45.3472		8.184	236.288	81.5005
7.626	276.63	85.7955		7.905	250.325	103.671		9.021	188.181	43.7775		8.277	229.889	79.9746
7.719	270.948	86.3117		7.998	244.157	104.347		9.114	181.318	42.4773		8.37	225.912	78.7942
7.812	264.525	85.866		8.091	247.004	100.811		9.207	179.633	40.5027		8.463	223.98	75.6754
7.905	262.725	83.5797		8.184	239.999	100.365		9.3	176.833	37.3874		8.556	216.902	74.2431
7.998	263.673	83.1882		8.277	239.076	97.3013		9.393	173.107	36.9271		8.649	218.665	70.5133
8.091	257.08	83.1492		8.37	236.91	95.8669		9.486	166.216	35.7915		8.742	212.232	69.5761
8.184	252.417	84.2994		8.463	232.828	93.788		9.579	163.141	33.3955		8.835	207.468	68.9965
8.277	250.822	79.5113		8.556	236.173	93.0044		9.672	157.703	32.3828		8.928	202.822	67.1924
8.37	243.968	77.0168		8.649	229.337	90.9946		9.765	152.578	31.3755		9.021	197.867	65.3755
8.463	240.455	78.8881		8.742	226.959	90.037		9.858	148.996	32.0257		9.114	200.279	63.7591
8.556	237.989	76.1701		8.835	219.741	88.0182		9.951	142.173	31.7566		9.207	199.22	61.905
8.649	231.93	73.4346		8.928	212.717	85.9463		10.044	135.132	29.3014		9.3	199.301	60.3753
8.742	225.366	70.3768		9.021	209.023	84.0093						9.393	196.903	59.8088
8.835	218.73	67.2822		9.114	202.321	82.1116						9.486	191.167	58.4613
8.928	211.874	64.4562		9.207	202.222	84.1896						9.579	190.026	56.0998
9.021	205.171	61.7755		9.3	197.522	84.7958						9.672	188.071	54.6527
9.114	198.362	59.3679		9.393	194.846	84.2654						9.765	186.396	51.6664
9.207	192.468	58.8856		9.486	188.797	83.7899						9.858	184.122	49.8306
9.3	185.595	56.791		9.579	182.747	83.4825						9.951	179.772	47.8357
9.393	178.723	54.834		9.672	183.821	89.8146						10.044	177.132	43.5301
9.486	172.324	54.9435		9.765	189.748	94.1235						10.137	175.298	42.9237
9.579	164.846	53.0188		9.858	184.957	94.6829						10.23	169.68	41.3012
9.672	156.61	53.7556		9.951	183.772	103.446						10.323	166.929	38.15
9.765	153.486	53.0314		10.044	178.569	104.144						10.416	161.343	36.8966
9.858	154.347	50.7931										10.509	155.252	35.526
9.951	159.635	46.371										10.602	149.369	33.328
10.044	151.387	45.0166										10.695	143.487	31.3619
												10.788	135.792	33.0384

## Sheet: Speeds
Field 1				Field 2				Field 3				Field 4
WT				WT				WT				WT
Walled cells				Walled cells				Walled cells				Walled cells
Speed (um/s)				Speed (um/s)				Speed (um/s)				Speed (um/s)
time	mean	stdev		time	mean	stdev		time	mean	stdev		time	mean	stdev
-7.44	0.0725478	0.0466418		-7.347	0.097358	0.104083		-6.975	0.095008	0.0606826		-7.533	0.054282	0.0236432
-7.347	0.066873	0.0420105		-7.254	0.092228	0.0946755		-6.882	0.095212	0.0625605		-7.44	0.0519	0.0218534
-7.254	0.0610882	0.0385742		-7.161	0.0871627	0.0706707		-6.789	0.0913133	0.0601973		-7.347	0.049518	0.0201889
-7.161	0.0589909	0.0355771		-7.068	0.0798792	0.0619456		-6.696	0.09026	0.0637543		-7.254	0.047136	0.0186834
-7.068	0.0537108	0.0331007		-6.975	0.0760042	0.0554267		-6.603	0.076435	0.0558059		-7.161	0.044254	0.0176724
-6.975	0.050606	0.0287189		-6.882	0.0721292	0.0490972		-6.51	0.0739942	0.0577043		-7.068	0.0378933	0.0172089
-6.882	0.0503406	0.0260765		-6.789	0.0669094	0.037378		-6.417	0.0695942	0.056409		-6.975	0.0356867	0.01601
-6.789	0.0484706	0.0238515		-6.696	0.066819	0.0367972		-6.324	0.0651942	0.0553845		-6.882	0.0413325	0.018849
-6.696	0.04853	0.0233226		-6.603	0.0630058	0.0326813		-6.231	0.0731946	0.0678361		-6.789	0.052912	0.0343076
-6.603	0.0440827	0.022363		-6.51	0.0596557	0.0280899		-6.138	0.0686893	0.0634269		-6.696	0.0507916	0.0314893
-6.51	0.0453364	0.022348		-6.417	0.0560978	0.0244659		-6.045	0.059823	0.0536845		-6.603	0.0499672	0.0289879
-6.417	0.0445436	0.0205966		-6.324	0.0551396	0.0240144		-5.952	0.0545903	0.0479224		-6.51	0.0488002	0.0264657
-6.324	0.0452877	0.0196956		-6.231	0.0538235	0.0230492		-5.859	0.0510646	0.0429911		-6.417	0.051048	0.0276136
-6.231	0.044329	0.0185292		-6.138	0.0540467	0.0253579		-5.766	0.0491793	0.039468		-6.324	0.0483874	0.0248831
-6.138	0.0432584	0.0175888		-6.045	0.0502318	0.024762		-5.673	0.050168	0.0359156		-6.231	0.0470103	0.0244224
-6.045	0.0419491	0.0173843		-5.952	0.0478786	0.0234747		-5.58	0.0492358	0.0324718		-6.138	0.0448206	0.0236674
-5.952	0.0408606	0.0170741		-5.859	0.0443897	0.0226887		-5.487	0.048022	0.0301204		-6.045	0.0449947	0.0257995
-5.859	0.0396473	0.0171318		-5.766	0.0432829	0.0224239		-5.394	0.0483896	0.0309922		-5.952	0.0433329	0.0252232
-5.766	0.039902	0.0188114		-5.673	0.0432614	0.0223521		-5.301	0.0489372	0.0399993		-5.859	0.0425682	0.0244293
-5.673	0.0425166	0.0251954		-5.58	0.0440276	0.0244932		-5.208	0.0491178	0.0385859		-5.766	0.0435231	0.0243129
-5.58	0.0394814	0.0235969		-5.487	0.0454318	0.0280198		-5.115	0.0512011	0.0471601		-5.673	0.0425164	0.0234505
-5.487	0.0400312	0.0235611		-5.394	0.0444338	0.0295906		-5.022	0.0499245	0.0461956		-5.58	0.042034	0.0232457
-5.394	0.0390805	0.0221151		-5.301	0.0427852	0.0294945		-4.929	0.0485897	0.0451876		-5.487	0.0452105	0.0415577
-5.301	0.0399716	0.0236316		-5.208	0.0425027	0.0306644		-4.836	0.0465109	0.0442237		-5.394	0.0448681	0.0378233
-5.208	0.040421	0.0224751		-5.115	0.0430369	0.0328595		-4.743	0.0446669	0.0398971		-5.301	0.0445487	0.0350871
-5.115	0.038847	0.0218712		-5.022	0.0428765	0.0355353		-4.65	0.0429616	0.0365339		-5.208	0.0435166	0.0319818
-5.022	0.0395773	0.0234638		-4.929	0.0437726	0.0388348		-4.557	0.0416626	0.0334996		-5.115	0.0432191	0.0298058
-4.929	0.0383846	0.0234114		-4.836	0.0422298	0.0404955		-4.464	0.0399417	0.0316355		-5.022	0.042064	0.0275668
-4.836	0.0363109	0.023612		-4.743	0.0401475	0.0364778		-4.371	0.0426367	0.0469455		-4.929	0.0415825	0.0262453
-4.743	0.0356216	0.023289		-4.65	0.0390805	0.0339275		-4.278	0.0411441	0.044235		-4.836	0.0406081	0.0242473
-4.65	0.0350835	0.0225795		-4.557	0.0382156	0.0312316		-4.185	0.0398797	0.0420778		-4.743	0.0401579	0.0235755
-4.557	0.03448	0.0221115		-4.464	0.0373298	0.0291795		-4.092	0.0387225	0.0404979		-4.65	0.0391157	0.0225833
-4.464	0.0335519	0.0206888		-4.371	0.0361476	0.0276371		-3.999	0.0381708	0.0395718		-4.557	0.0381705	0.0215964
-4.371	0.0342324	0.0224462		-4.278	0.0360005	0.0274597		-3.906	0.0372029	0.0398353		-4.464	0.0374763	0.0210681
-4.278	0.0332552	0.020763		-4.185	0.0345459	0.0247276		-3.813	0.0360918	0.0364687		-4.371	0.0369312	0.0205518
-4.185	0.0322115	0.0190482		-4.092	0.0339653	0.0234874		-3.72	0.0348212	0.0331323		-4.278	0.0359119	0.0203425
-4.092	0.0325202	0.0185538		-3.999	0.0324501	0.0217217		-3.627	0.0338079	0.0301881		-4.185	0.0352706	0.0200811
-3.999	0.0316992	0.0174444		-3.906	0.0310484	0.0206636		-3.534	0.033082	0.0282697		-4.092	0.0347359	0.0201685
-3.906	0.0309305	0.0166954		-3.813	0.0305254	0.0192892		-3.441	0.0327206	0.0272444		-3.999	0.0344319	0.0198334
-3.813	0.029762	0.015371		-3.72	0.0300751	0.0181561		-3.348	0.0325391	0.0267144		-3.906	0.0345681	0.0196754
-3.72	0.0286202	0.0142109		-3.627	0.0294859	0.0171431		-3.255	0.0330396	0.0267078		-3.813	0.0345766	0.0195556
-3.627	0.0285556	0.0135728		-3.534	0.0290114	0.0163779		-3.162	0.0338184	0.0273746		-3.72	0.034696	0.0195896
-3.534	0.0281592	0.0129398		-3.441	0.0286661	0.0157126		-3.069	0.0347538	0.0289614		-3.627	0.0348106	0.0197038
-3.441	0.0280236	0.0125512		-3.348	0.0285418	0.0152567		-2.976	0.035875	0.0312125		-3.534	0.0349582	0.0198053
-3.348	0.028886	0.0144169		-3.255	0.0300868	0.0191286		-2.883	0.0374127	0.0338034		-3.441	0.0349712	0.0190957
-3.255	0.0288529	0.0142393		-3.162	0.0302547	0.0189383		-2.79	0.0391817	0.0369952		-3.348	0.0350177	0.0186472
-3.162	0.0291784	0.0142274		-3.069	0.0305572	0.0191421		-2.697	0.0411986	0.0405281		-3.255	0.0350488	0.0184566
-3.069	0.0293637	0.0143133		-2.976	0.0313285	0.0198781		-2.604	0.0428401	0.0412503		-3.162	0.0349788	0.0183949
-2.976	0.0296198	0.0147475		-2.883	0.031936	0.0206401		-2.511	0.0445911	0.0426069		-3.069	0.0352197	0.0182156
-2.883	0.0306069	0.0153285		-2.79	0.03276	0.0213808		-2.418	0.0464408	0.0446288		-2.976	0.0351419	0.0177412
-2.79	0.0319503	0.0162047		-2.697	0.0336022	0.0225147		-2.325	0.0473422	0.0420839		-2.883	0.0350523	0.0176673
-2.697	0.0336162	0.0163191		-2.604	0.0345612	0.024		-2.232	0.0483027	0.0397558		-2.79	0.0352463	0.017678
-2.604	0.0351246	0.0171324		-2.511	0.0357521	0.0256967		-2.139	0.0493572	0.0381474		-2.697	0.035487	0.0180584
-2.511	0.036524	0.0183669		-2.418	0.0368958	0.0269263		-2.046	0.050337	0.0372347		-2.604	0.0361297	0.0186643
-2.418	0.0382198	0.0198921		-2.325	0.0383515	0.0281484		-1.953	0.0512776	0.0358193		-2.511	0.0371841	0.019201
-2.325	0.0402111	0.0214898		-2.232	0.0396623	0.0298701		-1.86	0.0521574	0.0354413		-2.418	0.0383392	0.0201985
-2.232	0.0419718	0.0227581		-2.139	0.0409541	0.0316865		-1.767	0.053158	0.0361072		-2.325	0.0395661	0.0214214
-2.139	0.0439559	0.0242913		-2.046	0.0422615	0.0325158		-1.674	0.0542433	0.0359409		-2.232	0.0409933	0.0228238
-2.046	0.0459468	0.0260575		-1.953	0.0438156	0.0328038		-1.581	0.0552149	0.036638		-2.139	0.0423908	0.0239191
-1.953	0.0474232	0.0276406		-1.86	0.0456412	0.0325482		-1.488	0.0563951	0.0380227		-2.046	0.0443463	0.0245854
-1.86	0.0485768	0.0287086		-1.767	0.0476908	0.0328759		-1.395	0.0583757	0.0391855		-1.953	0.0462979	0.0255409
-1.767	0.0496054	0.0280475		-1.674	0.0498631	0.0338102		-1.302	0.0607886	0.0404316		-1.86	0.0483031	0.026368
-1.674	0.0506141	0.0280656		-1.581	0.0518632	0.0351873		-1.209	0.0631814	0.0429143		-1.767	0.0504147	0.0273455
-1.581	0.0521158	0.0283932		-1.488	0.0557176	0.0371507		-1.116	0.0656123	0.0462143		-1.674	0.0521234	0.0278731
-1.488	0.0530591	0.0284864		-1.395	0.0581926	0.0391986		-1.023	0.0680164	0.0470931		-1.581	0.0537831	0.0284829
-1.395	0.0542588	0.0288307		-1.302	0.0606247	0.0421477		-0.93	0.0707394	0.0489912		-1.488	0.0553801	0.0296835
-1.302	0.0556602	0.0298258		-1.209	0.0631308	0.0457024		-0.837	0.0731414	0.0509632		-1.395	0.0570158	0.0312521
-1.209	0.0570542	0.0308282		-1.116	0.0654038	0.0488695		-0.744	0.0757632	0.0538095		-1.302	0.0585467	0.0331946
-1.116	0.0584838	0.0325629		-1.023	0.0677836	0.0516768		-0.651	0.0785316	0.0574724		-1.209	0.0599947	0.034834
-1.023	0.0606666	0.0349599		-0.93	0.0692487	0.0519068		-0.558	0.0808486	0.0600546		-1.116	0.0611808	0.0362104
-0.93	0.062932	0.0373872		-0.837	0.0705257	0.0529945		-0.465	0.0823371	0.0609714		-1.023	0.0624936	0.0377617
-0.837	0.0648469	0.0376136		-0.744	0.0718075	0.0548633		-0.372	0.0824691	0.059226		-0.93	0.063536	0.0381575
-0.744	0.0666973	0.0388509		-0.651	0.0735687	0.0571282		-0.279	0.0829874	0.0584076		-0.837	0.0642995	0.0382148
-0.651	0.0683669	0.0390626		-0.558	0.0740255	0.0536837		-0.186	0.0834551	0.0584845		-0.744	0.0653058	0.0386443
-0.558	0.0700844	0.0402505		-0.465	0.0751625	0.0508746		-0.093	0.0832802	0.0578624		-0.651	0.0663279	0.0384855
-0.465	0.0713222	0.041777		-0.372	0.0764109	0.0491658		0	0.0831835	0.0575708		-0.558	0.0671431	0.0388583
-0.372	0.0723784	0.0435781		-0.279	0.0775591	0.0483393		0.093	0.0830494	0.0576152		-0.465	0.0678459	0.0391876
-0.279	0.0734828	0.046171		-0.186	0.0797692	0.0494314		0.186	0.0828643	0.0582787		-0.372	0.0685785	0.0396743
-0.186	0.0744011	0.0491333		-0.093	0.0810034	0.0513908		0.279	0.0824666	0.059764		-0.279	0.0693676	0.0393326
-0.093	0.0744934	0.0493306		0	0.0830809	0.0541534		0.372	0.0818775	0.05805		-0.186	0.0698217	0.038532
0	0.0744613	0.0493935		0.093	0.0851435	0.0574522		0.465	0.0823768	0.0572441		-0.093	0.0703365	0.0382219
0.093	0.0745919	0.0475737		0.186	0.0870354	0.0617558		0.558	0.082818	0.0548078		0	0.0711338	0.0380161
0.186	0.0747769	0.0464348		0.279	0.0882642	0.0665747		0.651	0.0836487	0.0530447		0.093	0.0721112	0.0386159
0.279	0.0746822	0.0452897		0.372	0.0898306	0.067293		0.744	0.084543	0.0518574		0.186	0.0732342	0.0391439
0.372	0.0746966	0.0447818		0.465	0.0907702	0.0690361		0.837	0.085947	0.0501617		0.279	0.0739868	0.0394238
0.465	0.0749377	0.0440025		0.558	0.0918947	0.0717668		0.93	0.0863148	0.049283		0.372	0.075011	0.0407549
0.558	0.075023	0.0434073		0.651	0.0930728	0.0752721		1.023	0.0868349	0.0499693		0.465	0.0761716	0.0425721
0.651	0.0750755	0.0430473		0.744	0.0943769	0.0748941		1.116	0.0873401	0.0504771		0.558	0.0771682	0.0447084
0.744	0.075183	0.0435121		0.837	0.0932139	0.0700826		1.209	0.0881393	0.0522781		0.651	0.0779914	0.0466123
0.837	0.0752261	0.042488		0.93	0.0921795	0.0652974		1.302	0.0894769	0.0552018		0.744	0.07884	0.0479489
0.93	0.0758542	0.042346		1.023	0.0912549	0.0610554		1.395	0.0896126	0.0570522		0.837	0.079781	0.0499619
1.023	0.0764945	0.0420608		1.116	0.090511	0.0579824		1.488	0.0904146	0.0598663		0.93	0.0804967	0.0515477
1.116	0.0771491	0.0429173		1.209	0.0904195	0.0563593		1.581	0.0906523	0.0610944		1.023	0.0810209	0.0520091
1.209	0.0780784	0.0442954		1.302	0.0902099	0.0526195		1.674	0.0907946	0.0632428		1.116	0.0813258	0.0518743
1.302	0.0790691	0.0455983		1.395	0.0904437	0.0499372		1.767	0.0905024	0.0632048		1.209	0.081908	0.0507709
1.395	0.0798819	0.0472256		1.488	0.0902882	0.0487812		1.86	0.0916611	0.0637587		1.302	0.0824586	0.0503041
1.488	0.081185	0.0491745		1.581	0.0899495	0.0492743		1.953	0.0927638	0.0647932		1.395	0.0826691	0.0498598
1.581	0.0823019	0.0518598		1.674	0.0899064	0.0512732		2.046	0.0936121	0.0660511		1.488	0.0830432	0.0496645
1.674	0.0836536	0.0551825		1.767	0.0917366	0.0538124		2.139	0.094065	0.0675509		1.581	0.0837502	0.0496034
1.767	0.0860431	0.0557436		1.86	0.0927364	0.0565369		2.232	0.0944904	0.0696333		1.674	0.0842188	0.0490101
1.86	0.0874014	0.0559996		1.953	0.0936708	0.0600187		2.325	0.0930302	0.0688481		1.767	0.0846055	0.0489259
1.953	0.0889091	0.0553357		2.046	0.0939687	0.0625359		2.418	0.0937682	0.0666359		1.86	0.0852359	0.0491625
2.046	0.0904998	0.0559016		2.139	0.0925791	0.0640723		2.511	0.0940128	0.0649872		1.953	0.0861471	0.0495926
2.139	0.0921736	0.0573		2.232	0.0923263	0.0640014		2.604	0.0942446	0.0641838		2.046	0.0869508	0.0494537
2.232	0.0937414	0.0597839		2.325	0.0927871	0.063475		2.697	0.0955402	0.0631141		2.139	0.0874177	0.0482411
2.325	0.0948934	0.0612775		2.418	0.093682	0.0640229		2.79	0.0950913	0.0613124		2.232	0.08812	0.0478003
2.418	0.0956873	0.06279		2.511	0.0946668	0.065644		2.883	0.0957034	0.0610512		2.325	0.0892653	0.0476059
2.511	0.0964209	0.0651726		2.604	0.0950255	0.0660925		2.976	0.0968087	0.0617507		2.418	0.0904267	0.047933
2.604	0.096978	0.0679008		2.697	0.0952905	0.0648178		3.069	0.0985436	0.0636267		2.511	0.0912172	0.0486527
2.697	0.0963209	0.0647077		2.79	0.0964849	0.0643339		3.162	0.100109	0.0662501		2.604	0.0923837	0.0491479
2.79	0.097047	0.061777		2.883	0.0975851	0.0649009		3.255	0.10155	0.0691438		2.697	0.0934612	0.0495859
2.883	0.0972857	0.0583379		2.976	0.0994279	0.0659462		3.348	0.103969	0.0707902		2.79	0.0944815	0.0505789
2.976	0.0975779	0.055843		3.069	0.102262	0.0684035		3.441	0.106123	0.0733521		2.883	0.0951783	0.0519091
3.069	0.0977232	0.0542823		3.162	0.106158	0.0714965		3.534	0.108208	0.0752119		2.976	0.0956321	0.0532784
3.162	0.0975879	0.0531527		3.255	0.109331	0.0717887		3.627	0.10946	0.0763599		3.069	0.0963742	0.0531375
3.255	0.0971484	0.0509125		3.348	0.112083	0.0725104		3.72	0.109982	0.0751576		3.162	0.0970643	0.0538204
3.348	0.0982453	0.0497722		3.441	0.114886	0.0742679		3.813	0.110316	0.0724996		3.255	0.0972829	0.0540757
3.441	0.0995532	0.0500926		3.534	0.117873	0.0776568		3.906	0.110648	0.0708658		3.348	0.0973115	0.0550311
3.534	0.100769	0.051779		3.627	0.12006	0.0775306		3.999	0.110273	0.0680911		3.441	0.097534	0.0545763
3.627	0.101861	0.0525123		3.72	0.122068	0.0774004		4.092	0.109869	0.0669245		3.534	0.0988496	0.054613
3.72	0.102229	0.0533819		3.813	0.124247	0.078507		4.185	0.110025	0.0664852		3.627	0.099788	0.0546419
3.813	0.101844	0.0541323		3.906	0.126159	0.0803807		4.278	0.109403	0.0646636		3.72	0.10021	0.0546391
3.906	0.102184	0.0557009		3.999	0.126368	0.0797704		4.371	0.108439	0.064157		3.813	0.100709	0.0555818
3.999	0.103289	0.0575941		4.092	0.121227	0.0754804		4.464	0.107541	0.0647455		3.906	0.101618	0.0563825
4.092	0.103891	0.0603716		4.185	0.117984	0.0726782		4.557	0.106518	0.065651		3.999	0.102088	0.0570191
4.185	0.103921	0.0625345		4.278	0.114709	0.0702718		4.65	0.105894	0.0674976		4.092	0.102493	0.0582836
4.278	0.103463	0.0638223		4.371	0.111679	0.0687853		4.743	0.105261	0.067249		4.185	0.103352	0.0602733
4.371	0.102802	0.0654182		4.464	0.108148	0.0681022		4.836	0.104586	0.0674197		4.278	0.104609	0.0622926
4.464	0.102859	0.0678067		4.557	0.108097	0.0667622		4.929	0.104393	0.0671751		4.371	0.105695	0.0645914
4.557	0.104072	0.0690116		4.65	0.105566	0.0642176		5.022	0.103979	0.0663318		4.464	0.104585	0.0631382
4.65	0.105767	0.0702909		4.743	0.102697	0.0616615		5.115	0.102711	0.064333		4.557	0.105077	0.063966
4.743	0.106598	0.070717		4.836	0.0996663	0.0594503		5.208	0.102518	0.0615831		4.65	0.10616	0.0652153
4.836	0.107927	0.0714572		4.929	0.0982434	0.0579927		5.301	0.103524	0.0600944		4.743	0.107462	0.0676888
4.929	0.108694	0.0710482		5.022	0.0988923	0.057123		5.394	0.105287	0.0593899		4.836	0.107935	0.0689873
5.022	0.109588	0.0713046		5.115	0.100416	0.0564272		5.487	0.107228	0.0595914		4.929	0.107926	0.0665966
5.115	0.11052	0.0723031		5.208	0.101735	0.0568331		5.58	0.109741	0.0609253		5.022	0.109535	0.0675835
5.208	0.111755	0.0739513		5.301	0.103411	0.0582239		5.673	0.109392	0.0608699		5.115	0.111019	0.0688079
5.301	0.113304	0.0764584		5.394	0.105643	0.0605546		5.766	0.111459	0.0654986		5.208	0.11057	0.0663244
5.394	0.113737	0.0766095		5.487	0.108212	0.0625377		5.859	0.113376	0.0700352		5.301	0.111251	0.0674005
5.487	0.112365	0.0761872		5.58	0.110467	0.0634793		5.952	0.115536	0.0750085		5.394	0.112446	0.0677301
5.58	0.113866	0.0766402		5.673	0.113031	0.0650535		6.045	0.118115	0.079989		5.487	0.113743	0.0683176
5.673	0.115527	0.0756826		5.766	0.115049	0.0630827		6.138	0.120006	0.0827209		5.58	0.114708	0.0674119
5.766	0.119044	0.075629		5.859	0.118098	0.0615288		6.231	0.117038	0.0807691		5.673	0.116373	0.0673265
5.859	0.12103	0.0769537		5.952	0.12159	0.060228		6.324	0.113551	0.0777759		5.766	0.118723	0.0678804
5.952	0.123016	0.0796201		6.045	0.124566	0.0604092		6.417	0.113831	0.078273		5.859	0.120609	0.0681359
6.045	0.125382	0.0832887		6.138	0.128203	0.0614674		6.51	0.113743	0.0774093		5.952	0.122341	0.0692213
6.138	0.127478	0.0870224		6.231	0.130744	0.0640075		6.603	0.114662	0.0776864		6.045	0.124304	0.0715189
6.231	0.129724	0.090921		6.324	0.132819	0.0679854		6.696	0.115514	0.0784411		6.138	0.126016	0.073559
6.324	0.132767	0.0954529		6.417	0.134894	0.0718718		6.789	0.116212	0.079423		6.231	0.127307	0.0753459
6.417	0.128717	0.0855494		6.51	0.136718	0.0756944		6.882	0.116444	0.0789223		6.324	0.128276	0.0772553
6.51	0.130556	0.0877508		6.603	0.137334	0.0806599		6.975	0.117863	0.0799035		6.417	0.128917	0.0800838
6.603	0.12791	0.0842387		6.696	0.133861	0.0781856		7.068	0.11754	0.0768532		6.51	0.130033	0.0831992
6.696	0.127429	0.0818222		6.789	0.133948	0.0808059		7.161	0.11878	0.0779874		6.603	0.13013	0.0838779
6.789	0.127406	0.0796478		6.882	0.135793	0.0833747		7.254	0.123409	0.0803231		6.696	0.129214	0.0847122
6.882	0.124101	0.0778882		6.975	0.131133	0.0768575		7.347	0.126027	0.0822274		6.789	0.127739	0.0812284
6.975	0.124049	0.0770507		7.068	0.130543	0.0766552		7.44	0.118118	0.0629737		6.882	0.128167	0.0811042
7.068	0.118518	0.0703078		7.161	0.130278	0.0774296		7.533	0.120395	0.0634498		6.975	0.126406	0.0764656
7.161	0.117696	0.0692147		7.254	0.130633	0.0788727		7.626	0.1235	0.0692757		7.068	0.126753	0.076248
7.254	0.115985	0.0674977		7.347	0.125032	0.0751761		7.719	0.128196	0.0758476		7.161	0.127599	0.0771969
7.347	0.113546	0.063378		7.44	0.125016	0.0744496		7.812	0.132358	0.0803952		7.254	0.128354	0.0774352
7.44	0.112014	0.0618489		7.533	0.125306	0.074677		7.905	0.135945	0.0849242		7.347	0.130633	0.0788923
7.533	0.107142	0.0584913		7.626	0.124639	0.0758143		7.998	0.140589	0.0920377		7.44	0.132512	0.0801308
7.626	0.10805	0.0584973		7.719	0.126014	0.0773076		8.091	0.142267	0.0957449		7.533	0.132585	0.0798129
7.719	0.108856	0.0598718		7.812	0.123301	0.0778288		8.184	0.131578	0.0810479		7.626	0.134915	0.0828442
7.812	0.109044	0.0604804		7.905	0.120324	0.0705021		8.277	0.134437	0.0803571		7.719	0.132291	0.0781372
7.905	0.112051	0.0591567		7.998	0.12244	0.0707976		8.37	0.135639	0.0794268		7.812	0.13342	0.0784687
7.998	0.116385	0.0586669		8.091	0.124355	0.0729015		8.463	0.136633	0.0774785		7.905	0.133365	0.0800001
8.091	0.1188	0.0573336		8.184	0.125575	0.0749794		8.556	0.131334	0.0736675		7.998	0.136376	0.0811876
8.184	0.122116	0.0551393		8.277	0.130575	0.0770472		8.649	0.129598	0.0728053		8.091	0.138655	0.0832993
8.277	0.117614	0.0467246		8.37	0.134683	0.0814829		8.742	0.127261	0.0733455		8.184	0.135784	0.0782752
8.37	0.120843	0.0448285		8.463	0.129324	0.0663645		8.835	0.125306	0.0737603		8.277	0.136355	0.0757993
8.463	0.124157	0.0479091		8.556	0.125168	0.0645401		8.928	0.118354	0.0742594		8.37	0.134249	0.0738865
8.556	0.126499	0.0506927		8.649	0.126893	0.0677518		9.021	0.119882	0.0763728		8.463	0.132764	0.0727667
8.649	0.132437	0.0532117		8.742	0.125294	0.0689802		9.114	0.122814	0.080036		8.556	0.13384	0.0738822
8.742	0.137417	0.0569897		8.835	0.12713	0.0704034		9.207	0.123832	0.0781832		8.649	0.134925	0.0668042
8.835	0.141174	0.0606241		8.928	0.126275	0.0706471		9.3	0.123774	0.0755451		8.742	0.134503	0.0667009
8.928	0.143248	0.0640664		9.021	0.124647	0.0679162		9.393	0.129627	0.071399		8.835	0.133393	0.0660695
9.021	0.145872	0.0690404		9.114	0.126862	0.0685766		9.486	0.126341	0.0699511		8.928	0.133433	0.0699491
9.114	0.145487	0.0665637		9.207	0.132503	0.0642275		9.579	0.12738	0.0734522		9.021	0.132366	0.0723553
9.207	0.14835	0.0746036		9.3	0.13252	0.0611168		9.672	0.129595	0.0741585		9.114	0.123482	0.0648033
9.3	0.153206	0.0805795		9.393	0.13525	0.0601884		9.765	0.131736	0.0769147		9.207	0.125353	0.0634658
9.393	0.163051	0.0869433		9.486	0.135257	0.0605432		9.858	0.145899	0.0788395		9.3	0.131063	0.0651984
9.486	0.170813	0.0997621		9.579	0.135265	0.0639129		9.951	0.15301	0.0838706		9.393	0.129938	0.0673803
9.579	0.176399	0.108997		9.672	0.139753	0.05979		10.044	0.15533	0.0966796		9.486	0.131308	0.0716231
9.672	0.164727	0.11152		9.765	0.147094	0.0665932						9.579	0.131553	0.0713237
9.765	0.174399	0.125238		9.858	0.14829	0.0754604						9.672	0.136422	0.0771934
9.858	0.179786	0.125549		9.951	0.137172	0.0709043						9.765	0.139538	0.082654
9.951	0.198679	0.137519		10.044	0.136846	0.0816619						9.858	0.144206	0.0896438
10.044	0.205861	0.143974										9.951	0.148514	0.089471
												10.044	0.153072	0.0965183
												10.137	0.137784	0.0714493
												10.23	0.138674	0.0695524
												10.323	0.1439	0.0673069
												10.416	0.14548	0.0682771
												10.509	0.140183	0.0693865
												10.602	0.141143	0.0728747
												10.695	0.142101	0.0780072
												10.788	0.147006	0.0844252
												10.881	0.16851	0.111106
												10.974	0.139228	0.0939915
												11.067	0.142764	0.0969243
												11.16	0.1463	0.100156
												11.253	0.149836	0.103657
												11.346	0.153372	0.107403

## Sheet: ANOVA
One-way ANOVA at time 0s
Significance level	α =	0.05
	mean	stdev	N
Field 1	818.086	200.364	64
Field 2	812.061	201.569	79
Field 3	841.586	166.196	91
Field 4	831.773	198.433	202
Overall mean	m=	828.24
Between-group degrees of freedom	dfb=	3
Between-group mean square value	MSb=	15336.1
Within-group degrees of freedom	dfw=	432
Within-group mean square value	MSw=	37265.6
F-ratio	F=	0.411535
Critical value	Fcrit=	2.62555
p-value	p=	0.744797
There is no statistically significant difference between all 4 fields of view
