# Supplementary material for: Rapid adaptation of endocytosis, exocytosis, and eisosomes after an acute increase in membrane tension in yeast cells
Source: eLife. 2021 May 13;10:e62084. doi: 10.7554/eLife.62084 (PMC9045820; doi:10.7554/eLife.62084)
Supplement: Figure 6—source data 2. [file elife-62084-fig6-data2.xlsx]

## Sheet: Number of molecules (#)
WT				WT				WT
Walled cells				Walled cells				Walled cells
steady state in 0M sorbitol				steady state in 0.8M sorbitol				steady state in 1.2M sorbitol
N=	388			N=	454			N=	451
Number of molecules (#)				Number of molecules (#)				Number of molecules (#)
time	mean	stdev		time	mean	stdev		time	mean	stdev
-6.975	144.437	81.1826		-7.44	144.729	97.5969		-7.905	152.437	79.933
-6.882	149.794	79.8596		-7.347	149.712	96.4049		-7.812	159.539	80.8688
-6.789	155.295	78.5494		-7.254	153.458	94.6276		-7.719	160.936	81.2704
-6.696	157.665	77.6371		-7.161	154.807	91.0519		-7.626	161.994	82.3894
-6.603	162.984	75.9875		-7.068	158.261	88.0372		-7.533	165.265	81.4955
-6.51	163.441	72.6786		-6.975	162.129	84.0955		-7.44	162.539	80.3599
-6.417	171.323	73.3016		-6.882	168.282	84.9407		-7.347	164.92	82.6275
-6.324	174.994	73.0956		-6.789	171.556	83.814		-7.254	165.187	81.2016
-6.231	178.018	72.5294		-6.696	173.824	84.1229		-7.161	168.794	81.497
-6.138	185.893	72.7578		-6.603	177.361	83.6341		-7.068	170.327	80.7657
-6.045	186.969	74.9744		-6.51	181.805	83.1148		-6.975	169.301	77.2132
-5.952	193.638	76.4868		-6.417	189.968	84.3022		-6.882	176.36	78.145
-5.859	197.997	76.4373		-6.324	191.982	83.5213		-6.789	179.787	78.8207
-5.766	204.425	77.6047		-6.231	198.012	84.2161		-6.696	184.031	79.2717
-5.673	211.919	76.9718		-6.138	202.937	84.1302		-6.603	189.285	79.5754
-5.58	216.701	80.8013		-6.045	206.147	85.1905		-6.51	193.56	83.3946
-5.487	225.525	82.42		-5.952	211.022	86.0095		-6.417	200.873	84.5385
-5.394	232.287	84.8267		-5.859	219.046	91.0383		-6.324	205.012	84.7568
-5.301	238.224	87.5388		-5.766	226.243	91.8429		-6.231	210.333	84.6873
-5.208	246.639	89.2515		-5.673	233.311	92.3793		-6.138	216.292	84.493
-5.115	248.095	92.966		-5.58	237.795	95.5654		-6.045	221.775	93.1734
-5.022	255.543	95.9167		-5.487	249.805	105.295		-5.952	226.972	94.8838
-4.929	262.914	97.3299		-5.394	257.656	106.495		-5.859	235.26	95.9474
-4.836	271.253	98.1899		-5.301	267.521	107.457		-5.766	244.596	96.9599
-4.743	281.237	99.5941		-5.208	276.821	108.376		-5.673	252.938	97.6105
-4.65	288.959	101.463		-5.115	284.827	110.229		-5.58	255.49	100.551
-4.557	299.147	103.418		-5.022	293.973	112.163		-5.487	264.358	102.386
-4.464	310.262	105.376		-4.929	304.622	113.36		-5.394	272.469	103.789
-4.371	321.848	106.71		-4.836	315.009	114.547		-5.301	280.663	105.044
-4.278	333.949	108.522		-4.743	326.191	115.369		-5.208	290.617	105.986
-4.185	343.613	114.072		-4.65	336.021	117.366		-5.115	298.612	107.178
-4.092	353.927	117.123		-4.557	346.172	118.804		-5.022	307.725	108.7
-3.999	366.291	119.136		-4.464	356.561	119.818		-4.929	318.881	110.501
-3.906	378.497	120.819		-4.371	368.045	120.653		-4.836	330.155	111.433
-3.813	391.261	122.665		-4.278	379.736	121.595		-4.743	340.587	112.044
-3.72	402.787	124.734		-4.185	390.62	122.538		-4.65	351.337	114.184
-3.627	415.074	127.031		-4.092	400.15	124.58		-4.557	360.96	116.438
-3.534	427.19	129.258		-3.999	412.954	126.017		-4.464	371.32	117.497
-3.441	440.111	130.966		-3.906	424.847	126.86		-4.371	381.881	118.305
-3.348	453.073	132.705		-3.813	436.832	127.601		-4.278	392.228	119.505
-3.255	466.204	134.475		-3.72	448.523	129.01		-4.185	402.604	120.992
-3.162	479.454	137.395		-3.627	460.68	130.456		-4.092	415.208	125.664
-3.069	493.062	138.989		-3.534	472.573	131.365		-3.999	426.214	126.973
-2.976	506.761	140.779		-3.441	484.503	132.484		-3.906	438.097	128.868
-2.883	520.507	142.503		-3.348	496.518	133.755		-3.813	448.904	130.107
-2.79	534.543	144.398		-3.255	508.514	134.786		-3.72	460.002	131.767
-2.697	549.058	146.833		-3.162	521.293	136.654		-3.627	472.505	136.252
-2.604	563.309	148.791		-3.069	533.974	137.885		-3.534	484.047	137.841
-2.511	577.356	150.631		-2.976	546.523	139.552		-3.441	495.5	139.156
-2.418	591.941	152.727		-2.883	559.482	141.301		-3.348	506.96	140.847
-2.325	606.552	154.995		-2.79	572.236	143.157		-3.255	518.783	142.692
-2.232	620.625	157.31		-2.697	585.538	144.847		-3.162	530.047	144.842
-2.139	635.307	159.291		-2.604	598.999	147.068		-3.069	542.112	146.957
-2.046	649.869	160.934		-2.511	612.458	149.056		-2.976	554.515	149.024
-1.953	664.686	162.947		-2.418	626.303	151.461		-2.883	567.304	151.207
-1.86	679.294	164.896		-2.325	639.885	154.052		-2.79	580.037	153.527
-1.767	693.912	167.01		-2.232	653.305	156.494		-2.697	593.4	156.085
-1.674	708.338	169.385		-2.139	666.634	159.064		-2.604	606.625	158.724
-1.581	722.304	171.917		-2.046	679.945	161.849		-2.511	619.953	161.462
-1.488	735.807	174.549		-1.953	693.004	164.571		-2.418	633.09	164.264
-1.395	749.011	177.405		-1.86	705.96	167.446		-2.325	645.99	167.107
-1.302	760.089	180.883		-1.767	718.606	170.664		-2.232	658.552	169.416
-1.209	771.76	183.367		-1.674	730.738	173.305		-2.139	671.399	171.883
-1.116	782.469	185.994		-1.581	742.203	175.649		-2.046	683.976	174.202
-1.023	792.322	188.599		-1.488	752.989	177.721		-1.953	696.194	176.194
-0.93	801.39	191.241		-1.395	763.308	180.088		-1.86	708.159	178.312
-0.837	808.903	193.733		-1.302	770.305	184.801		-1.767	719.072	180.32
-0.744	815.921	196.214		-1.209	778.977	187.245		-1.674	729.785	182.542
-0.651	822.384	198.737		-1.116	787.375	189.207		-1.581	739.913	184.586
-0.558	827.941	201.091		-1.023	794.994	191.218		-1.488	749.757	186.606
-0.465	833.295	203.724		-0.93	802.018	193.371		-1.395	759.23	188.743
-0.372	834.068	208.548		-0.837	807.755	195.148		-1.302	766.093	192.311
-0.279	836.938	210.282		-0.744	812.834	196.939		-1.209	774.197	194.711
-0.186	839.396	211.629		-0.651	817.138	198.549		-1.116	781.583	196.998
-0.093	841.041	212.642		-0.558	821.042	200.09		-1.023	788.437	199.28
0	842.129	213.662		-0.465	824.538	201.821		-0.93	794.754	201.75
0.093	841.532	215.757		-0.372	822.985	207.27		-0.837	798.779	204.211
0.186	841.624	217.323		-0.279	825.266	208.198		-0.744	803.638	206.212
0.279	841.354	219.159		-0.186	827.134	208.94		-0.651	807.738	208.039
0.372	840.402	220.838		-0.093	828.478	209.521		-0.558	811.412	209.878
0.465	839.278	222.833		0	829.449	210.154		-0.465	814.642	211.883
0.558	833.071	227.076		0.093	829.263	210.178		-0.372	815.077	215.279
0.651	830.497	227.15		0.186	828.832	210.168		-0.279	815.746	217.269
0.744	827.516	227.311		0.279	828.019	210.134		-0.186	817.068	218.657
0.837	823.963	227.331		0.372	826.952	210.118		-0.093	817.985	219.936
0.93	820.163	227.435		0.465	825.762	210.385		0	818.673	221.114
1.023	815.86	227.676		0.558	819.972	215.659		0.093	815.8	224.426
1.116	811.471	228.11		0.651	817.936	215.517		0.186	815.608	225.549
1.209	807.028	228.688		0.744	815.571	215.173		0.279	814.746	226.596
1.302	802.686	229.202		0.837	813.128	214.965		0.372	813.543	227.848
1.395	798.34	229.923		0.93	810.821	214.775		0.465	812.361	229.416
1.488	791.377	231.064		1.023	807.091	213.864		0.558	809.829	229.685
1.581	785.863	230.334		1.116	803.281	213.047		0.651	806.247	230.257
1.674	780.124	229.532		1.209	799.318	212.254		0.744	803.133	230.181
1.767	774.844	229.047		1.302	795.168	211.454		0.837	799.808	230.188
1.86	769.014	228.55		1.395	792.433	210.228		0.93	796.241	230.145
1.953	762.718	227.384		1.488	787.201	209.845		1.023	791.818	229.464
2.046	756.373	226.316		1.581	782.619	209.469		1.116	787.307	228.712
2.139	749.811	225.248		1.674	777.967	209.345		1.209	782.838	228.282
2.232	742.99	224.26		1.767	773.204	209.085		1.302	778.172	227.506
2.325	737.199	223.455		1.86	767.153	207.673		1.395	774.278	226.454
2.418	729.767	222.033		1.953	761.147	206.778		1.488	766.485	228.004
2.511	722.337	220.64		2.046	754.826	205.584		1.581	761.396	226.827
2.604	714.594	219.22		2.139	748.15	204.367		1.674	756.161	225.74
2.697	706.728	217.697		2.232	741.168	203.462		1.767	750.794	224.533
2.79	701.115	216.168		2.325	734.298	202.838		1.86	745.188	223.536
2.883	692.818	214.464		2.418	727.312	201.807		1.953	739.453	222.45
2.976	684.801	212.677		2.511	719.958	201.137		2.046	733.576	221.56
3.069	676.682	211.008		2.604	712.516	200.27		2.139	727.548	220.917
3.162	668.74	209.706		2.697	704.979	199.566		2.232	721.476	220.163
3.255	660.61	208.325		2.79	696.986	198.796		2.325	717.53	218.41
3.348	652.773	205.5		2.883	689.73	197.094		2.418	711.066	217.373
3.441	643.864	202.99		2.976	681.793	195.669		2.511	704.299	216.541
3.534	635.086	200.529		3.069	673.794	194.582		2.604	697.284	215.632
3.627	626.541	198.392		3.162	665.879	193.074		2.697	690.213	214.784
3.72	616.457	195.971		3.255	661.128	190.239		2.79	681.836	207.92
3.813	607.562	194.115		3.348	651.265	190.355		2.883	674.332	207.07
3.906	598.651	192.362		3.441	643.301	188.93		2.976	667.219	206.18
3.999	589.753	190.708		3.534	635.279	187.348		3.069	659.939	205.154
4.092	581.348	189.482		3.627	627.136	185.392		3.162	652.663	204.434
4.185	573.472	188.264		3.72	618.136	183.012		3.255	646.307	203.827
4.278	562.567	185.946		3.813	609.975	181.451		3.348	638.253	202.941
4.371	553.577	183.9		3.906	602	179.401		3.441	630.641	201.649
4.464	544.528	181.715		3.999	594.1	177.467		3.534	622.907	200.248
4.557	535.85	179.93		4.092	586.068	175.955		3.627	615.093	198.901
4.65	530.179	176.804		4.185	578.676	171.63		3.72	605.582	196.464
4.743	521.972	174.607		4.278	570.266	170.063		3.813	597.813	195.048
4.836	512.937	172.404		4.371	561.604	168.647		3.906	589.833	193.365
4.929	503.666	169.98		4.464	552.988	167.108		3.999	581.986	191.796
5.022	495.157	168.495		4.557	544.843	166.03		4.092	574.343	190.512
5.115	487.676	166.094		4.65	537.551	164.398		4.185	567.4	188.776
5.208	478.866	163.953		4.743	529.406	163.654		4.278	559.493	186.479
5.301	469.7	161.426		4.836	520.58	162.523		4.371	551.324	183.947
5.394	460.3	159.095		4.929	512.009	161.361		4.464	543.054	181.431
5.487	451.674	156.79		5.022	503.383	160.357		4.557	534.865	179.242
5.58	442.774	153.862		5.115	494.565	159.196		4.65	525.785	174.665
5.673	435.834	151.607		5.208	486.337	158.265		4.743	518.125	172.394
5.766	427.197	149.935		5.301	478.149	157.147		4.836	509.877	169.858
5.859	418.763	148.244		5.394	470.354	156.214		4.929	501.917	167.532
5.952	409.73	146.672		5.487	462.224	154.868		5.022	494.152	165.469
6.045	400.949	145.123		5.58	455.038	153.445		5.115	486.403	162.724
6.138	395.113	143.568		5.673	448.276	148.176		5.208	480.05	160.676
6.231	386.486	142.088		5.766	440.582	146.233		5.301	472.626	158.967
6.324	378.397	140.902		5.859	432.601	144.236		5.394	465.243	157.333
6.417	369.992	139.046		5.952	424.88	142.828		5.487	458.076	155.688
6.51	360.683	135.921		6.045	417.947	140.896		5.58	451.321	154.299
6.603	354.391	132.981		6.138	410.4	139.013		5.673	446.544	152.632
6.696	345.967	130.824		6.231	402.868	137.105		5.766	439.486	151.291
6.789	338.563	129.195		6.324	395.462	135.276		5.859	432.615	150.454
6.882	330.679	127.229		6.417	388.441	132.912		5.952	425.595	149.088
6.975	322.395	125.387		6.51	381.293	130.88		6.045	418.588	147.837
7.068	316.548	121.171		6.603	375.166	129.003		6.138	412.328	146.664
7.161	308.653	118.728		6.696	368.115	127.179		6.231	405.314	145.725
7.254	301.389	116.84		6.789	360.877	125.127		6.324	398.654	144.989
7.347	294.944	115.011		6.882	353.918	123.131		6.417	391.488	143.971
7.44	288.895	112.954		6.975	347.375	120.898		6.51	384.842	143.065
7.533	287.001	109.473		7.068	344.108	117.926		6.603	378.248	142.429
7.626	279.549	107.525		7.161	337.077	116.367		6.696	371.283	141.473
7.719	271.935	106.121		7.254	330.241	114.678		6.789	365.672	141.124
7.812	266.666	103.796		7.347	323.916	113.444		6.882	360.24	140.295
7.905	258.658	101.85		7.44	317.994	112.137		6.975	354.396	139.203
7.998	258.76	99.9289		7.533	312.323	104.005		7.068	347.819	130.519
8.091	251.817	98.7556		7.626	305.645	103.187		7.161	341.221	128.66
8.184	244.262	97.3886		7.719	299.171	102.523		7.254	335.181	127.065
8.277	242.49	95.9593		7.812	293.987	100.049		7.347	329.034	125.315
8.37	234.563	94.3502		7.905	287.404	99.1755		7.44	322.303	123.178
8.463	234.757	92.7473		7.998	285.676	96.5246		7.533	318.1	120.92
8.556	227.988	91.8301		8.091	278.968	95.7972		7.626	311.304	118.957
8.649	222.722	91.2707		8.184	273.434	94.7784		7.719	304.608	117.567
8.742	219.544	90.5723		8.277	267.947	93.7035		7.812	298.363	115.829
8.835	211.908	89.0658		8.37	261.324	92.825		7.905	291.59	114.108
8.928	207.527	88.4925		8.463	258.112	89.674		7.998	287.767	111.85
9.021	201.708	86.9327		8.556	251.589	88.7649		8.091	281.182	109.98
9.114	202.414	85.2257		8.649	246.62	87.5644		8.184	275.474	108.042
9.207	205.541	83.4026		8.742	242.966	85.3195		8.277	272.053	106.305
9.3	197.715	80.4127		8.835	236.731	84.1577		8.37	267.667	104.092
9.393	197.448	79.6976		8.928	231.093	80.2357		8.463	264.858	101.37
9.486	190.823	76.5286		9.021	225.335	79.2957		8.556	258.994	99.9585
9.579	190.251	72.8209		9.114	219.531	78.4223		8.649	254.969	98.5499
9.672	189.119	69.4734		9.207	218.988	76.0121		8.742	251.755	96.7365
9.765	181.13	66.7997		9.3	212.608	74.6581		8.835	246.731	94.7927
9.858	177.954	59.5284		9.393	210.333	72.164		8.928	243.222	84.2781
9.951	175.024	57.8584		9.486	205.991	71.4366		9.021	238.22	83.1272
10.044	174.094	55.7034		9.579	204.845	69.6466		9.114	232.773	82.3672
10.137	172.627	53.2344		9.672	201.346	68.0791		9.207	228.036	81.5821
10.23	166.369	51.5318		9.765	195.622	66.8846		9.3	223.649	80.4146
10.323	163.666	50.5653		9.858	193.674	65.7167		9.393	221.767	79.1508
10.416	160.46	49.1007		9.951	191.471	64.8901		9.486	216.916	78.1027
10.509	156.152	48.6045		10.044	187.667	63.87		9.579	212.533	77.2353
10.602	149.65	47.6509		10.137	187.587	63.7385		9.672	210.397	75.9529
10.695	143.149	46.9539		10.23	181.878	63.4762		9.765	205.048	74.9922
10.788	144.743	44.2518		10.323	179.19	61.2599		9.858	205.269	74.7829
10.881	170.948	46.0926		10.416	176.798	61.4758		9.951	202.282	73.6697
				10.509	171.155	60.3809		10.044	197.357	72.6615
				10.602	170.388	58.3905		10.137	192.629	71.9819
				10.695	164.727	57.5425		10.23	188.238	70.738
				10.788	163.864	57.5204		10.323	188.315	70.2281
				10.881	169.828	54.642		10.416	188.581	71.9605
				10.974	164.225	53.8224		10.509	183.658	70.7694
				11.067	161.143	52.821		10.602	182.405	69.3021
				11.16	155.476	51.2245		10.695	179.46	67.9361
				11.253	156.742	50.2594		10.788	182.236	64.0817
				11.346	156.117	49.6112		10.881	178.381	63.4955
				11.439	154.447	48.7894		10.974	178.989	61.5192
				11.532	153.971	47.7146		11.067	175.769	60.2318
				11.625	150.482	45.2692		11.16	171.992	58.8846
				11.718	147.667	46.176		11.253	172.418	59.0961
				11.811	137.548	47.4266		11.346	169.909	58.8963
				11.904	148.686	44.2903		11.439	169.857	58.718
								11.532	166.158	59.0032
								11.625	161.681	59.2687
								11.718	163.406	60.2265
								11.811	160.498	59.5894
								11.904	161.892	59.8188
								11.997	165.547	57.4093
								12.09	163.754	55.401
								12.183	164.202	56.3173
								12.276	162.392	56.5706
								12.369	161.002	54.4906
								12.462	157.955	54.3134
								12.555	157.942	50.0983
								12.648	164.73	56.4296
								12.741	146.822	28.5138
								12.834	141.907	27.7071

## Sheet: Speeds
WT				WT				WT
Walled cells				Walled cells				Walled cells
steady state in 0M sorbitol				steady state in 0.8M sorbitol				steady state in 1.2M sorbitol
Speed (um/s)				Speed (um/s)				Speed (um/s)
time	mean	stdev		time	mean	stdev		time	mean	stdev
-6.696	0.0265	0.0148456		-7.44	0.0706813	0.0777833		-7.905	0.0309911	0.0146623
-6.603	0.02781	0.0151949		-7.347	0.0727825	0.0830937		-7.812	0.0302733	0.0147096
-6.51	0.04688	0.0405375		-7.254	0.07017	0.076188		-7.719	0.0295556	0.0151281
-6.417	0.0461222	0.0382073		-7.161	0.0675575	0.0693583		-7.626	0.036844	0.0283566
-6.324	0.0560636	0.0481111		-7.068	0.064445	0.0626935		-7.533	0.0399518	0.0295143
-6.231	0.0512175	0.0449933		-6.975	0.0668511	0.0551678		-7.44	0.0375225	0.026461
-6.138	0.0496715	0.0397018		-6.882	0.0637422	0.0493793		-7.347	0.0359323	0.0238493
-6.045	0.0629026	0.0629638		-6.789	0.0606333	0.0438354		-7.254	0.0347847	0.0210397
-5.952	0.0590055	0.0556195		-6.696	0.0631729	0.0440493		-7.161	0.033424	0.0203107
-5.859	0.0572866	0.0489506		-6.603	0.0593857	0.0395004		-7.068	0.0419594	0.0429739
-5.766	0.0551096	0.0428465		-6.51	0.0653138	0.0412696		-6.975	0.0572225	0.037106
-5.673	0.0534038	0.0380823		-6.417	0.0636121	0.0414919		-6.882	0.0548862	0.03474
-5.58	0.0520683	0.0352128		-6.324	0.0624343	0.0379196		-6.789	0.0590803	0.0422595
-5.487	0.0503303	0.0315734		-6.231	0.0634204	0.0496239		-6.696	0.0556089	0.0388917
-5.394	0.0501335	0.0287201		-6.138	0.0599511	0.0442223		-6.603	0.0598209	0.0458929
-5.301	0.0481396	0.0270165		-6.045	0.0577266	0.0402974		-6.51	0.0609224	0.0484533
-5.208	0.0472719	0.0255409		-5.952	0.0579508	0.040113		-6.417	0.05886	0.0445987
-5.115	0.0466184	0.0255262		-5.859	0.0557766	0.0371307		-6.324	0.0599644	0.0448311
-5.022	0.0462302	0.0250309		-5.766	0.0537738	0.0348854		-6.231	0.0623633	0.0549124
-4.929	0.0471609	0.0301728		-5.673	0.0525103	0.0344563		-6.138	0.0600281	0.0502135
-4.836	0.0466401	0.0300408		-5.58	0.050266	0.0344578		-6.045	0.0569102	0.0442431
-4.743	0.0448425	0.0299304		-5.487	0.0489064	0.032344		-5.952	0.0559232	0.0421132
-4.65	0.0432124	0.0301263		-5.394	0.0479532	0.0327725		-5.859	0.0536055	0.0388749
-4.557	0.0421357	0.0305185		-5.301	0.0466313	0.0312883		-5.766	0.052257	0.0360742
-4.464	0.0416859	0.0315616		-5.208	0.0472137	0.0347465		-5.673	0.0505042	0.0332265
-4.371	0.0411223	0.032274		-5.115	0.0454525	0.0328772		-5.58	0.0480367	0.0301505
-4.278	0.0412569	0.0323683		-5.022	0.043861	0.0313621		-5.487	0.0460542	0.0278655
-4.185	0.04083	0.030214		-4.929	0.0435689	0.0323526		-5.394	0.0451194	0.0270879
-4.092	0.0400862	0.0282012		-4.836	0.042985	0.0318582		-5.301	0.0433803	0.0258798
-3.999	0.0393163	0.0262836		-4.743	0.0418072	0.0312564		-5.208	0.0420243	0.0249552
-3.906	0.0389156	0.0248643		-4.65	0.0418181	0.0338677		-5.115	0.0417814	0.0289831
-3.813	0.0378817	0.0231459		-4.557	0.0410945	0.0324833		-5.022	0.0409837	0.0281686
-3.72	0.0373398	0.0220682		-4.464	0.0412095	0.0341116		-4.929	0.0401759	0.0277094
-3.627	0.037067	0.0227805		-4.371	0.0402712	0.033032		-4.836	0.0402313	0.0299446
-3.534	0.0361586	0.0215915		-4.278	0.0393568	0.0321432		-4.743	0.0392711	0.028295
-3.441	0.0352712	0.020681		-4.185	0.0394892	0.0332515		-4.65	0.0388317	0.0269673
-3.348	0.0346462	0.0200666		-4.092	0.0394184	0.0328566		-4.557	0.0385105	0.0260672
-3.255	0.0343949	0.0202693		-3.999	0.0386676	0.0308986		-4.464	0.0378546	0.0247249
-3.162	0.034399	0.0202658		-3.906	0.0378199	0.0295221		-4.371	0.0379318	0.0266581
-3.069	0.0340361	0.0197879		-3.813	0.0371064	0.0283427		-4.278	0.0371247	0.0256172
-2.976	0.0338511	0.0194912		-3.72	0.0372656	0.0325187		-4.185	0.036711	0.0249542
-2.883	0.0335416	0.0192882		-3.627	0.0368252	0.0321313		-4.092	0.0362831	0.0246696
-2.79	0.0333303	0.0191871		-3.534	0.0366055	0.0321391		-3.999	0.0354629	0.0238387
-2.697	0.0335879	0.0190752		-3.441	0.0363666	0.0324747		-3.906	0.0348497	0.0232708
-2.604	0.0337711	0.0191481		-3.348	0.0362187	0.0329593		-3.813	0.0341884	0.0227644
-2.511	0.0341619	0.0195911		-3.255	0.0361507	0.0336984		-3.72	0.0336836	0.0224646
-2.418	0.0347571	0.0202286		-3.162	0.036389	0.0343931		-3.627	0.0335615	0.022375
-2.325	0.0352926	0.0210941		-3.069	0.0368114	0.0353573		-3.534	0.0331013	0.0218777
-2.232	0.035994	0.0212934		-2.976	0.0370408	0.0359718		-3.441	0.032764	0.0215387
-2.139	0.0370011	0.0219452		-2.883	0.0375393	0.0367227		-3.348	0.0324767	0.0212582
-2.046	0.0380889	0.0226592		-2.79	0.0380833	0.0376346		-3.255	0.0323611	0.0211982
-1.953	0.03961	0.0235281		-2.697	0.0388417	0.036075		-3.162	0.0324096	0.021164
-1.86	0.041287	0.0245314		-2.604	0.0395655	0.0347052		-3.069	0.0327044	0.0214885
-1.767	0.043215	0.025414		-2.511	0.0404123	0.0335276		-2.976	0.0330835	0.022166
-1.674	0.045275	0.0267035		-2.418	0.0414643	0.0327818		-2.883	0.033626	0.0229465
-1.581	0.0472124	0.0280511		-2.325	0.0423782	0.0317572		-2.79	0.0342127	0.023983
-1.488	0.0490774	0.0292171		-2.232	0.0435007	0.0310388		-2.697	0.0351585	0.0249907
-1.395	0.0510875	0.0308272		-2.139	0.0446927	0.0305194		-2.604	0.0360403	0.0250095
-1.302	0.0531052	0.0313965		-2.046	0.0458548	0.0303892		-2.511	0.0370152	0.0251954
-1.209	0.0552843	0.0322213		-1.953	0.0469222	0.0307574		-2.418	0.0381674	0.0256852
-1.116	0.057502	0.0332982		-1.86	0.0480594	0.0313598		-2.325	0.0392275	0.0260532
-1.023	0.0595557	0.0343001		-1.767	0.0494515	0.0316625		-2.232	0.0404746	0.0260638
-0.93	0.0613598	0.0348233		-1.674	0.0507925	0.032241		-2.139	0.0416501	0.0256716
-0.837	0.0630085	0.0349898		-1.581	0.0522668	0.0329737		-2.046	0.0428156	0.0252108
-0.744	0.0645105	0.0357165		-1.488	0.0536774	0.0339742		-1.953	0.0439777	0.0251126
-0.651	0.0660716	0.036802		-1.395	0.0550643	0.034507		-1.86	0.0451331	0.0253881
-0.558	0.0677294	0.0385416		-1.302	0.0562522	0.0351011		-1.767	0.046202	0.0251455
-0.465	0.0692389	0.0408005		-1.209	0.0574938	0.0360551		-1.674	0.047302	0.0253432
-0.372	0.0705518	0.0426257		-1.116	0.0588295	0.0372636		-1.581	0.0483668	0.0257145
-0.279	0.0719143	0.0443664		-1.023	0.0598388	0.0375102		-1.488	0.0494789	0.0264685
-0.186	0.0732192	0.0458002		-0.93	0.0609751	0.0381294		-1.395	0.0506863	0.0275139
-0.093	0.0745226	0.0474206		-0.837	0.0625013	0.0382239		-1.302	0.0518658	0.0278713
0	0.0760028	0.0494032		-0.744	0.0638102	0.0389141		-1.209	0.053089	0.0286352
0.093	0.0774326	0.0501735		-0.651	0.0648475	0.039366		-1.116	0.0542819	0.0295683
0.186	0.0791126	0.0514261		-0.558	0.0659941	0.0402457		-1.023	0.0554367	0.0305394
0.279	0.0808738	0.0527603		-0.465	0.0672296	0.0414467		-0.93	0.056729	0.0317624
0.372	0.0825209	0.0534115		-0.372	0.0684733	0.0425908		-0.837	0.0578949	0.0323328
0.465	0.0842948	0.0550007		-0.279	0.0698428	0.0441389		-0.744	0.0591409	0.0333006
0.558	0.085898	0.0552234		-0.186	0.0712557	0.0458584		-0.651	0.060335	0.0345768
0.651	0.0877193	0.0559577		-0.093	0.0731048	0.047496		-0.558	0.0613773	0.0359374
0.744	0.0894208	0.056915		0	0.0746223	0.0491059		-0.465	0.0625924	0.0374873
0.837	0.091106	0.0582018		0.093	0.0760051	0.0492806		-0.372	0.0638573	0.0382766
0.93	0.0926384	0.0595264		0.186	0.0774638	0.0500885		-0.279	0.065132	0.0395071
1.023	0.0939779	0.0601111		0.279	0.0790051	0.0510454		-0.186	0.0665372	0.0405886
1.116	0.09521	0.0600324		0.372	0.0803468	0.051976		-0.093	0.0679342	0.0419873
1.209	0.0961611	0.060223		0.465	0.0817459	0.0532193		0	0.0691855	0.0430287
1.302	0.0969982	0.0607634		0.558	0.0830986	0.0538708		0.093	0.0706173	0.0434357
1.395	0.0978456	0.062076		0.651	0.0842108	0.0549259		0.186	0.0719592	0.0442881
1.488	0.0982915	0.0624535		0.744	0.0854542	0.056481		0.279	0.0731311	0.0447142
1.581	0.098918	0.0628551		0.837	0.0864345	0.0573717		0.372	0.0743203	0.0456731
1.674	0.0997203	0.0633948		0.93	0.087633	0.0582845		0.465	0.0753527	0.0462078
1.767	0.100338	0.0640984		1.023	0.0883475	0.0576758		0.558	0.075804	0.0459771
1.86	0.101214	0.0650588		1.116	0.0893084	0.0575739		0.651	0.0765207	0.0462709
1.953	0.102242	0.0658205		1.209	0.0902372	0.0572557		0.744	0.0768991	0.0466305
2.046	0.103314	0.0667486		1.302	0.0912966	0.0575792		0.837	0.0772573	0.0474971
2.139	0.104582	0.0677368		1.395	0.0923257	0.0578732		0.93	0.0776245	0.0485132
2.232	0.106422	0.0691637		1.488	0.0929868	0.057415		1.023	0.077627	0.0476725
2.325	0.108219	0.0708303		1.581	0.0936932	0.0575106		1.116	0.077939	0.0473745
2.418	0.109675	0.0708563		1.674	0.0942666	0.058259		1.209	0.0784148	0.0473993
2.511	0.111234	0.0711526		1.767	0.095012	0.0588791		1.302	0.0788978	0.0478193
2.604	0.112723	0.0721546		1.86	0.0959467	0.0602162		1.395	0.0789429	0.0483711
2.697	0.114084	0.0735805		1.953	0.0971153	0.0611473		1.488	0.0794691	0.0478485
2.79	0.115539	0.0744168		2.046	0.0978149	0.0615356		1.581	0.0797725	0.04773
2.883	0.116736	0.0749066		2.139	0.0984438	0.0617374		1.674	0.0804123	0.0481737
2.976	0.117784	0.075616		2.232	0.0991258	0.0618835		1.767	0.0811581	0.0483513
3.069	0.118752	0.0762609		2.325	0.0993966	0.0620995		1.86	0.082061	0.049092
3.162	0.118911	0.0762151		2.418	0.099956	0.06202		1.953	0.0829073	0.0492667
3.255	0.118989	0.0771196		2.511	0.100713	0.0617873		2.046	0.0836548	0.0499083
3.348	0.119354	0.0770936		2.604	0.101758	0.0624231		2.139	0.0844311	0.0505926
3.441	0.119812	0.0762651		2.697	0.102524	0.0633107		2.232	0.085343	0.0517254
3.534	0.120184	0.0760366		2.79	0.103299	0.0643413		2.325	0.086519	0.0530716
3.627	0.120279	0.0757374		2.883	0.103505	0.0637792		2.418	0.0875518	0.0536059
3.72	0.121304	0.0760246		2.976	0.103921	0.0640913		2.511	0.0887672	0.0548927
3.813	0.12196	0.0758401		3.069	0.104311	0.0645824		2.604	0.0897147	0.0564326
3.906	0.122427	0.0763071		3.162	0.103915	0.0625292		2.697	0.0904682	0.0577153
3.999	0.122703	0.0769432		3.255	0.104719	0.063039		2.79	0.0911438	0.0587417
4.092	0.123719	0.0780242		3.348	0.104655	0.0620679		2.883	0.0916207	0.0589356
4.185	0.124411	0.0796281		3.441	0.105447	0.0629362		2.976	0.0921076	0.0596586
4.278	0.124299	0.0781772		3.534	0.105999	0.0638878		3.069	0.0923576	0.0603704
4.371	0.124554	0.0774757		3.627	0.10696	0.0655937		3.162	0.0923225	0.0603829
4.464	0.124752	0.0767368		3.72	0.108137	0.0674481		3.255	0.0918182	0.0597967
4.557	0.124901	0.0755548		3.813	0.10931	0.0663814		3.348	0.0919459	0.0586109
4.65	0.124267	0.0753223		3.906	0.11042	0.0663893		3.441	0.0920377	0.0576025
4.743	0.124519	0.0740574		3.999	0.111947	0.0665162		3.534	0.0921396	0.0569199
4.836	0.124556	0.0730212		4.092	0.113031	0.0668041		3.627	0.0923637	0.0565889
4.929	0.125266	0.0731997		4.185	0.113969	0.0676316		3.72	0.0929447	0.0568357
5.022	0.126039	0.0741661		4.278	0.114748	0.0684123		3.813	0.0937619	0.0560707
5.115	0.126852	0.076357		4.371	0.115565	0.0688678		3.906	0.0944023	0.0563703
5.208	0.127089	0.0764166		4.464	0.116304	0.0700004		3.999	0.0952009	0.0571535
5.301	0.128087	0.0769021		4.557	0.115964	0.0702747		4.092	0.0956149	0.0582418
5.394	0.129391	0.0776951		4.65	0.116164	0.0717379		4.185	0.0959699	0.0591979
5.487	0.130536	0.0781822		4.743	0.1172	0.0715763		4.278	0.0967853	0.0594281
5.58	0.131616	0.0791447		4.836	0.117684	0.0722134		4.371	0.097915	0.0607145
5.673	0.133023	0.0784983		4.929	0.118063	0.0719229		4.464	0.0994359	0.0624769
5.766	0.133566	0.0780379		5.022	0.117878	0.0720603		4.557	0.100982	0.0642239
5.859	0.134064	0.0779196		5.115	0.118138	0.0721463		4.65	0.1022	0.0662737
5.952	0.134663	0.0779495		5.208	0.118314	0.07178		4.743	0.103893	0.0660265
6.045	0.134479	0.0769225		5.301	0.118702	0.0710638		4.836	0.105379	0.0663529
6.138	0.135402	0.0756137		5.394	0.118937	0.0704504		4.929	0.106635	0.0664871
6.231	0.13656	0.0752888		5.487	0.119446	0.0706821		5.022	0.10818	0.0669682
6.324	0.137177	0.0745413		5.58	0.119714	0.0711809		5.115	0.108886	0.0673484
6.417	0.138493	0.0755749		5.673	0.119233	0.0675753		5.208	0.109741	0.0662419
6.51	0.13873	0.0760847		5.766	0.119565	0.0672065		5.301	0.110362	0.066063
6.603	0.139484	0.074725		5.859	0.120098	0.0668052		5.394	0.110784	0.0664049
6.696	0.142115	0.0773202		5.952	0.119956	0.0664726		5.487	0.111285	0.0671492
6.789	0.144881	0.0803551		6.045	0.120497	0.0672086		5.58	0.110682	0.067481
6.882	0.146435	0.0833528		6.138	0.121082	0.0675492		5.673	0.110586	0.0655637
6.975	0.148315	0.0876644		6.231	0.121771	0.0676795		5.766	0.110205	0.0644989
7.068	0.146194	0.0849229		6.324	0.122697	0.0683731		5.859	0.110173	0.0637274
7.161	0.147458	0.0853966		6.417	0.123462	0.0691135		5.952	0.110244	0.0638873
7.254	0.147654	0.0862343		6.51	0.124378	0.0709151		6.045	0.111142	0.0649874
7.347	0.148332	0.0867714		6.603	0.125508	0.0706068		6.138	0.111645	0.0643291
7.44	0.149446	0.0889506		6.696	0.126454	0.071786		6.231	0.112396	0.0643795
7.533	0.145572	0.0864865		6.789	0.127716	0.0730288		6.324	0.113318	0.0646421
7.626	0.146246	0.0869478		6.882	0.128351	0.0742465		6.417	0.114306	0.0654399
7.719	0.147981	0.0882796		6.975	0.129349	0.0763137		6.51	0.115683	0.0669475
7.812	0.148482	0.0891278		7.068	0.130451	0.0769754		6.603	0.117	0.0675045
7.905	0.149911	0.091988		7.161	0.131016	0.0775993		6.696	0.118511	0.0686623
7.998	0.15041	0.0898827		7.254	0.131983	0.0787474		6.789	0.119417	0.0689339
8.091	0.150053	0.0875199		7.347	0.132865	0.0797697		6.882	0.120855	0.0691984
8.184	0.151319	0.0882141		7.44	0.133754	0.0816688		6.975	0.121952	0.0703064
8.277	0.151331	0.0865462		7.533	0.135089	0.0805562		7.068	0.123601	0.0701168
8.37	0.153028	0.0885088		7.626	0.13732	0.0805523		7.161	0.125012	0.0707954
8.463	0.148276	0.0839292		7.719	0.139247	0.0805405		7.254	0.125989	0.0719871
8.556	0.150505	0.0878342		7.812	0.142325	0.0820582		7.347	0.126897	0.0728254
8.649	0.153358	0.0891076		7.905	0.144804	0.0843082		7.44	0.12781	0.0745693
8.742	0.152786	0.0880731		7.998	0.147365	0.0842057		7.533	0.127925	0.073974
8.835	0.154631	0.0930006		8.091	0.149485	0.0848845		7.626	0.128784	0.0741442
8.928	0.150486	0.0883715		8.184	0.152465	0.0887072		7.719	0.129433	0.0741397
9.021	0.150406	0.08606		8.277	0.155433	0.0914136		7.812	0.130267	0.0741916
9.114	0.149872	0.0826267		8.37	0.157347	0.0942615		7.905	0.130839	0.0750395
9.207	0.154431	0.0859955		8.463	0.155305	0.0917525		7.998	0.132002	0.0735795
9.3	0.157501	0.090385		8.556	0.155063	0.0910009		8.091	0.13175	0.0725303
9.393	0.16081	0.0893905		8.649	0.154711	0.0900035		8.184	0.131994	0.0722979
9.486	0.162221	0.0958224		8.742	0.155207	0.08936		8.277	0.132392	0.0720634
9.579	0.158246	0.0989655		8.835	0.155242	0.0895082		8.37	0.132835	0.0736016
9.672	0.16558	0.10784		8.928	0.152413	0.0868681		8.463	0.132599	0.0732582
9.765	0.16946	0.115052		9.021	0.152465	0.0867215		8.556	0.133291	0.0740795
9.858	0.164603	0.115454		9.114	0.153023	0.0873522		8.649	0.133355	0.0754842
9.951	0.156272	0.104676		9.207	0.154473	0.0885887		8.742	0.132872	0.0751509
10.044	0.158291	0.103414		9.3	0.155425	0.0909809		8.835	0.133248	0.077856
10.137	0.145656	0.0862994		9.393	0.153265	0.0903974		8.928	0.133144	0.0755168
10.23	0.147028	0.0839006		9.486	0.156166	0.0903514		9.021	0.134578	0.0758568
10.323	0.143945	0.0808602		9.579	0.156732	0.0912834		9.114	0.135461	0.0757335
10.416	0.141208	0.0804726		9.672	0.155001	0.0881902		9.207	0.135284	0.0749322
10.509	0.143023	0.0874708		9.765	0.155319	0.0889212		9.3	0.136489	0.0769192
10.602	0.135218	0.0793103		9.858	0.15447	0.0898548		9.393	0.136851	0.076658
10.695	0.136449	0.0875301		9.951	0.153157	0.0896786		9.486	0.136623	0.0760167
10.788	0.145166	0.0947295		10.044	0.153611	0.0873748		9.579	0.136708	0.07587
10.881	0.161898	0.101581		10.137	0.154444	0.0882586		9.672	0.137916	0.078329
10.974	0.169147	0.114281		10.23	0.154539	0.0898053		9.765	0.139344	0.0820279
11.067	0.20632	0.116657		10.323	0.158915	0.0891075		9.858	0.139348	0.0785113
11.16	0.219568	0.127972		10.416	0.157715	0.0885274		9.951	0.137833	0.0786107
11.253	0.232817	0.139765		10.509	0.159299	0.0890802		10.044	0.138497	0.0804577
11.346	0.275184	0.150364		10.602	0.160032	0.0884331		10.137	0.140322	0.0834459
11.439	0.289588	0.164075		10.695	0.162479	0.0901913		10.23	0.142071	0.0873442
				10.788	0.158632	0.089667		10.323	0.143639	0.0857355
				10.881	0.160292	0.0858263		10.416	0.140271	0.0818046
				10.974	0.164096	0.0868258		10.509	0.140813	0.0808116
				11.067	0.172462	0.0887036		10.602	0.138729	0.0791389
				11.16	0.176066	0.091608		10.695	0.137562	0.0793189
				11.253	0.176201	0.0843797		10.788	0.141212	0.0818057
				11.346	0.181907	0.0862129		10.881	0.146517	0.0836532
				11.439	0.171744	0.0810631		10.974	0.145856	0.0809323
				11.532	0.168186	0.0822797		11.067	0.143395	0.0761827
				11.625	0.164506	0.0838104		11.16	0.142978	0.0767555
				11.718	0.152301	0.0682412		11.253	0.143579	0.0737616
				11.811	0.158501	0.0763763		11.346	0.143074	0.0736949
				11.904	0.165353	0.0776951		11.439	0.147985	0.0723174
				11.997	0.145101	0.0650837		11.532	0.144032	0.0661323
				12.09	0.157584	0.0540747		11.625	0.143472	0.069694
				12.183	0.170865	0.0511292		11.718	0.144085	0.0677101
				12.276	0.175803	0.0567109		11.811	0.141451	0.0683247
				12.369	0.180742	0.0637075		11.904	0.135438	0.0658512
				12.462	0.18568	0.071706		11.997	0.138932	0.0668462
				12.555	0.190618	0.0804081		12.09	0.14071	0.0666407
				12.648	0.163868	0.0600891		12.183	0.141311	0.0596983
								12.276	0.139289	0.0600146
								12.369	0.137807	0.0608285
								12.462	0.136121	0.0628784
								12.555	0.133541	0.0654436
								12.648	0.127071	0.0634779
								12.741	0.127884	0.0698883
								12.834	0.128121	0.0726495
								12.927	0.133196	0.0531797

## Sheet: ANOVA (#)
One -way ANOVA at time 0s
Significance level	α =	0.05
	mean	stdev	N
steady state in 0M sorbitol	842.129	213.662	388
steady state in 0.8M sorbitol	829.449	210.154	454
steady state in 1.2M sorbitol	818.673	221.114	451
Overall mean	m=	829.495
Between-group degrees of freedom	dfb=	2
Between-group mean square value	MSb=	57372.5
Within-group degrees of freedom	dfw=	1290
Within-group mean square value	MSw=	46259.6
F-ratio	F=	1.24023
Critical value	Fcrit=	3.0027
p-value	p=	0.289663
There is no statistically signficant difference between all conditions
