# Supplementary material for: Rapid adaptation of endocytosis, exocytosis, and eisosomes after an acute increase in membrane tension in yeast cells
Source: eLife. 2021 May 13;10:e62084. doi: 10.7554/eLife.62084 (PMC9045820; doi:10.7554/eLife.62084)
Supplement: Figure 6—source data 3. [file elife-62084-fig6-data3.xlsx]

## Sheet: Number of molecules
pil1Δ				pil1Δ				pil1Δ
Walled cells				Walled cells				Walled cells
steady state in 0M sorbitol				steady state in 0.8M sorbitol				steady state in 1.2M sorbitol
N=	342			N=	516			N=	514
Number of molecules (#)				Number of molecules (#)				Number of molecules (#)
time	mean	stdev		time	mean	stdev		time	mean	stdev
-6.51	152.606	74.2542		-7.905	129.596	63.2084		-8.37	140.114	100.799
-6.417	159.362	74.7152		-7.812	136.325	63.5877		-8.277	143.216	99.3496
-6.324	164.892	74.4624		-7.719	140.109	61.9545		-8.184	147.033	97.8075
-6.231	171.227	75.2084		-7.626	142.426	60.7021		-8.091	146.614	93.2419
-6.138	178.504	74.1289		-7.533	146.641	60.0814		-7.998	147.933	91.9963
-6.045	185.162	73.6537		-7.44	150.135	58.1402		-7.905	146.549	84.1973
-5.952	192.66	75.2909		-7.347	158.236	61.1176		-7.812	151.394	84.9814
-5.859	195.86	77.2932		-7.254	163.406	61.9188		-7.719	153.535	83.0065
-5.766	202.149	78.8063		-7.161	167.289	62.7916		-7.626	156.579	81.4746
-5.673	206.399	79.847		-7.068	170.587	65.287		-7.533	157.701	78.2801
-5.58	207.767	80.328		-6.975	171.143	65.5545		-7.44	159.15	75.94
-5.487	211.794	83.8216		-6.882	176.968	67.1232		-7.347	163.835	75.9788
-5.394	218.049	85.2073		-6.789	181.692	67.9603		-7.254	165.236	75.8949
-5.301	221.821	84.1951		-6.696	186.711	68.9183		-7.161	168.081	75.4797
-5.208	228.619	86.7384		-6.603	191.017	69.6449		-7.068	171.982	74.3153
-5.115	231.145	88.9114		-6.51	193.605	72.2541		-6.975	174.039	73.6805
-5.022	238.506	93.1108		-6.417	200.482	73.8426		-6.882	180.29	74.2916
-4.929	247.728	99.2189		-6.324	206.43	75.4169		-6.789	185.741	74.5509
-4.836	254.877	100.872		-6.231	212.415	76.1836		-6.696	189.083	74.8086
-4.743	262.765	101.174		-6.138	219.286	76.7414		-6.603	193.084	75.2807
-4.65	268.154	103.413		-6.045	220.994	81.196		-6.51	195.409	76.7062
-4.557	277.223	105.253		-5.952	229.109	82.4516		-6.417	200.738	79.8676
-4.464	285.401	106.662		-5.859	236.652	83.6065		-6.324	204.729	80.5586
-4.371	295.706	107.686		-5.766	244.069	84.5808		-6.231	211.37	80.9501
-4.278	306.645	108.56		-5.673	251.391	85.6064		-6.138	217.895	81.2834
-4.185	316.446	110.635		-5.58	258.053	87.4329		-6.045	222.552	82.8195
-4.092	324.095	113.93		-5.487	263.727	89.6224		-5.952	227.581	84.2407
-3.999	335.587	115.829		-5.394	271.626	91.1872		-5.859	233.058	84.7696
-3.906	347.496	117.683		-5.301	280.889	92.8842		-5.766	240.369	85.1823
-3.813	360.626	119.125		-5.208	290.386	94.348		-5.673	248.288	85.9289
-3.72	373.955	121.162		-5.115	298.153	96.935		-5.58	255.102	86.9044
-3.627	385.234	123.707		-5.022	306.711	99.8416		-5.487	260.977	88.2981
-3.534	398.397	125.354		-4.929	315.904	101.834		-5.394	268.239	89.387
-3.441	412.189	127.218		-4.836	325.282	103.567		-5.301	276.754	89.6182
-3.348	425.435	128.978		-4.743	335.931	105.35		-5.208	285.293	90.4123
-3.255	440.216	132.956		-4.65	345.717	107.309		-5.115	292.123	91.7642
-3.162	452.69	135.504		-4.557	354.338	109.969		-5.022	297.506	94.0624
-3.069	466.606	137.894		-4.464	364.697	111.839		-4.929	306.198	94.8848
-2.976	480.117	139.911		-4.371	375.08	114.082		-4.836	315.011	95.7408
-2.883	494.093	141.852		-4.278	385.207	116.118		-4.743	323.804	96.805
-2.79	507.764	144.27		-4.185	395.544	118.274		-4.65	332.777	98.1406
-2.697	520.769	146.747		-4.092	404.728	121.013		-4.557	342.038	99.3474
-2.604	534.811	148.987		-3.999	414.876	122.965		-4.464	351.097	100.431
-2.511	549.138	151.072		-3.906	425.339	124.773		-4.371	360.707	101.791
-2.418	563.794	152.916		-3.813	435.019	126.636		-4.278	370.317	103.272
-2.325	578.203	155.147		-3.72	445.064	128.285		-4.185	379.922	104.678
-2.232	595.764	158.376		-3.627	455.075	130.385		-4.092	389.464	107.291
-2.139	610.372	160.49		-3.534	465.207	132.551		-3.999	399.103	108.847
-2.046	625.129	162.627		-3.441	475.328	134.373		-3.906	408.443	110.331
-1.953	639.683	164.817		-3.348	485.575	136.682		-3.813	418.036	111.792
-1.86	653.969	167.212		-3.255	495.791	139.095		-3.72	427.387	113.39
-1.767	664.16	172.62		-3.162	505.934	141.892		-3.627	436.253	115.446
-1.674	678.284	175.138		-3.069	516.613	144.538		-3.534	445.548	116.865
-1.581	692.183	177.625		-2.976	527.44	147.163		-3.441	454.813	118.37
-1.488	705.554	179.709		-2.883	538.443	149.845		-3.348	464.156	119.969
-1.395	718.57	182.206		-2.79	549.548	152.624		-3.255	473.351	121.629
-1.302	730.762	184.721		-2.697	561.307	155.436		-3.162	482.774	123.583
-1.209	742.308	187.313		-2.604	572.476	158.057		-3.069	492.354	125.253
-1.116	753.371	190.102		-2.511	583.521	160.387		-2.976	501.963	127.073
-1.023	763.896	192.701		-2.418	594.578	163.173		-2.883	511.69	129.016
-0.93	774.169	195.489		-2.325	605.759	166.077		-2.79	521.485	130.978
-0.837	777.207	201.255		-2.232	616.234	169.747		-2.697	530.971	132.621
-0.744	785.24	203.036		-2.139	627.126	171.836		-2.604	540.907	134.372
-0.651	791.536	204.501		-2.046	637.943	173.948		-2.511	550.839	136.214
-0.558	797.58	205.919		-1.953	648.554	176.044		-2.418	560.806	138.142
-0.465	803.308	207.703		-1.86	658.981	178.258		-2.325	570.746	140.243
-0.372	808.116	209.232		-1.767	668.362	181.227		-2.232	579.975	141.957
-0.279	812.529	210.746		-1.674	678.278	183.85		-2.139	589.319	143.839
-0.186	816.016	212.039		-1.581	688.024	186.391		-2.046	598.532	145.609
-0.093	818.96	213.188		-1.488	697.381	188.722		-1.953	607.348	147.165
0	821.521	214.575		-1.395	706.202	190.959		-1.86	615.991	148.724
0.093	818.846	220.509		-1.302	712.612	194.453		-1.767	623.106	151.477
0.186	819.539	221.259		-1.209	719.953	196.405		-1.674	631.251	153.063
0.279	819.932	221.902		-1.116	726.706	198.309		-1.581	638.932	154.643
0.372	819.807	222.495		-1.023	732.876	200.067		-1.488	646.113	156.206
0.465	819.364	222.924		-0.93	738.739	202.053		-1.395	652.965	157.905
0.558	816.901	224.695		-0.837	742.252	204.639		-1.302	659.197	159.24
0.651	815.482	225.279		-0.744	746.964	206.47		-1.209	664.898	160.664
0.744	813.861	226.016		-0.651	751.018	208.15		-1.116	670.01	162.027
0.837	812.022	226.798		-0.558	754.803	209.797		-1.023	674.516	163.364
0.93	809.875	227.822		-0.465	758.377	211.658		-0.93	678.636	165.008
1.023	797.788	236.531		-0.372	756.684	216.653		-0.837	681.519	166.348
1.116	794.101	235.537		-0.279	758.529	217.234		-0.744	684.372	167.458
1.209	790.439	234.635		-0.186	759.695	217.568		-0.651	686.886	168.534
1.302	786.329	233.409		-0.093	760.354	217.538		-0.558	689.123	169.579
1.395	782.545	232.404		0	760.604	217.54		-0.465	691.941	170.258
1.488	776.494	232.007		0.093	759.56	217.656		-0.372	693.34	171.004
1.581	772.083	230.139		0.186	758.984	217.573		-0.279	694.531	171.954
1.674	767.671	228.399		0.279	758.191	217.419		-0.186	695.557	172.973
1.767	763.038	226.781		0.372	756.868	216.923		-0.093	696.397	174.004
1.86	758.666	225.233		0.465	755.25	216.49		0	697.008	175.079
1.953	754.054	222.739		0.558	752.693	215.364		0.093	690.041	182.458
2.046	748.527	220.53		0.651	741.43	224.35		0.186	689.4	182.417
2.139	742.803	218.319		0.744	738.716	223.19		0.279	688.305	182.359
2.232	737.295	216.781		0.837	735.697	221.996		0.372	686.754	182.185
2.325	732.201	214.822		0.93	732.618	220.937		0.465	684.93	182.027
2.418	725.823	212.852		1.023	729.216	219.673		0.558	682.789	181.725
2.511	719.195	211.037		1.116	725.687	218.532		0.651	680.484	181.445
2.604	712.548	209.473		1.209	722.008	217.524		0.744	678.005	181.207
2.697	705.427	208.218		1.302	718.324	216.619		0.837	675.433	180.856
2.79	698.875	207.11		1.395	715.13	215.525		0.93	672.7	180.694
2.883	690.076	205.746		1.488	709.942	215.281		1.023	665.615	184.817
2.976	682.662	203.078		1.581	705.676	214.261		1.116	662.187	183.964
3.069	675.047	200.322		1.674	701.358	213.213		1.209	658.64	183.187
3.162	667.396	197.603		1.767	696.821	211.839		1.302	655.013	182.543
3.255	658.976	193.449		1.86	692.045	210.535		1.395	651.241	182.055
3.348	651.456	191.093		1.953	686.833	209.127		1.488	647.11	181.094
3.441	643.672	189.052		2.046	681.607	207.872		1.581	642.699	180.274
3.534	636.087	186.94		2.139	676.347	206.477		1.674	638.146	179.466
3.627	628.358	184.947		2.232	670.94	205.19		1.767	633.377	178.715
3.72	621.79	182.683		2.325	665.84	204.078		1.86	629.355	177.573
3.813	614.862	179.928		2.418	659.831	202.115		1.953	624.193	176.718
3.906	606.697	177.983		2.511	653.581	200.149		2.046	618.858	175.733
3.999	598.642	176.082		2.604	647.277	198.237		2.139	613.625	174.924
4.092	590.877	174.454		2.697	640.879	196.148		2.232	608.245	174.085
4.185	581.999	172.185		2.79	634.551	194.202		2.325	603.236	173.049
4.278	571.705	166.069		2.883	628.281	192.228		2.418	597.534	172.408
4.371	563.749	164.077		2.976	621.945	190.341		2.511	591.909	171.505
4.464	555.724	162.434		3.069	615.208	188.363		2.604	586.224	170.535
4.557	547.81	160.884		3.162	608.486	186.461		2.697	580.466	169.636
4.65	539.139	159.194		3.255	603.051	184.787		2.79	574.467	169.065
4.743	530.298	157.467		3.348	596.671	182.094		2.883	569.221	167.251
4.836	522.073	155.618		3.441	589.916	179.734		2.976	563.091	165.897
4.929	513.901	154.429		3.534	583.071	177.37		3.069	557.271	164.476
5.022	505.899	152.765		3.627	576.116	175.008		3.162	551.824	163.316
5.115	498.521	150.139		3.72	569.258	172.587		3.255	546.935	161.606
5.208	489.947	148.856		3.813	562.191	170.27		3.348	541.148	160.219
5.301	481.466	147.162		3.906	554.992	168.195		3.441	535.193	158.819
5.394	473.796	145.79		3.999	548.155	166.082		3.534	529.365	157.567
5.487	464.571	143.857		4.092	541.825	164.361		3.627	523.531	156.193
5.58	456.691	142.665		4.185	535.05	162.541		3.72	518.337	152.748
5.673	447.576	140.965		4.278	529.215	160.061		3.813	510.89	151.882
5.766	438.986	138.555		4.371	521.992	158.605		3.906	504.803	150.014
5.859	430.505	136.345		4.464	514.88	157.299		3.999	498.556	148.082
5.952	421.516	134.559		4.557	507.666	156.12		4.092	492.593	146.44
6.045	413.255	132.548		4.65	500.699	154.67		4.185	487.239	144.293
6.138	407.564	131.426		4.743	493.532	153.418		4.278	481.126	142.516
6.231	399.106	129.542		4.836	486.32	152.12		4.371	474.779	140.698
6.324	391.024	127.73		4.929	479.151	151.014		4.464	468.614	139.471
6.417	382.958	125.527		5.022	472.002	150.002		4.557	462.147	138.03
6.51	376.018	123.275		5.115	465.374	148.967		4.65	456.778	136.296
6.603	368.251	119.902		5.208	458.504	147.022		4.743	450.45	135.473
6.696	360.217	117.78		5.301	451.145	145.27		4.836	444.152	134.22
6.789	352.805	115.488		5.394	443.883	143.437		4.929	438.174	132.899
6.882	345.214	113.526		5.487	436.701	141.28		5.022	431.693	131.965
6.975	337.578	111.33		5.58	432.471	138.075		5.115	425.28	130.738
7.068	329.709	108.686		5.673	425.874	136.251		5.208	419.796	129.906
7.161	322.286	106.647		5.766	418.981	134.375		5.301	414.001	128.762
7.254	314.381	105.318		5.859	412.14	132.761		5.394	408.002	127.568
7.347	307.275	103.285		5.952	405.331	131.276		5.487	402.342	126.688
7.44	300.59	100.898		6.045	398.372	129.731		5.58	396.946	125.654
7.533	296.63	94.2249		6.138	391.254	126.962		5.673	390.457	122.475
7.626	288.729	92.7851		6.231	384.549	125.535		5.766	384.446	121.089
7.719	282.067	91.4721		6.324	377.487	124.271		5.859	378.493	120.081
7.812	276.752	89.725		6.417	370.827	123.028		5.952	373.24	119.169
7.905	270.678	87.9809		6.51	365.323	121.185		6.045	368.375	117.419
7.998	266.579	86.7009		6.603	358.22	119.658		6.138	363.483	115.562
8.091	258.089	84.9936		6.696	351.315	118.269		6.231	357.493	113.947
8.184	250.909	83.6741		6.789	344.808	116.923		6.324	351.548	112.423
8.277	244.87	82.0482		6.882	338.051	115.733		6.417	345.722	110.979
8.37	238.852	80.469		6.975	330.879	113.407		6.51	339.542	109.537
8.463	233.654	73.4009		7.068	326.522	110.499		6.603	335.286	107.685
8.556	227.138	72.0875		7.161	320.256	109.523		6.696	329.351	105.928
8.649	221.047	70.3457		7.254	314.838	108.504		6.789	323.639	104.737
8.742	216.842	69.1773		7.347	309.918	107.153		6.882	318.401	103.342
8.835	210.786	68.265		7.44	304.066	105.993		6.975	312.558	101.712
8.928	210.519	66.6481		7.533	299.437	104.609		7.068	308.481	100.84
9.021	205.616	66.5367		7.626	293.828	103.679		7.161	303.528	99.5424
9.114	203.19	64.7739		7.719	288.36	103.017		7.254	297.963	98.6239
9.207	199.763	64.112		7.812	283.897	101.701		7.347	294.516	97.1027
9.3	193.983	63.7116		7.905	278.372	100.907		7.44	289.221	95.9082
9.393	190.66	63.7496		7.998	275.68	97.9818		7.533	284.732	94.8387
9.486	188.637	64.2582		8.091	270.381	97.1638		7.626	279.575	93.4946
9.579	185.838	65.3145		8.184	265.324	96.2191		7.719	274.238	92.1733
9.672	184.006	63.1074		8.277	261.621	94.5154		7.812	268.984	91.0504
9.765	178.842	61.436		8.37	255.633	92.0809		7.905	263.571	89.855
9.858	176.986	59.1052		8.463	254.143	90.0263		7.998	259.654	87.8498
9.951	175.139	58.0395		8.556	248.541	89.2978		8.091	254.488	86.8073
10.044	172.415	57.0415		8.649	244.065	88.0719		8.184	249.135	85.7229
10.137	169.265	56.4084		8.742	241.12	86.5577		8.277	244.908	84.4325
10.23	162.841	55.3052		8.835	235.248	85.2275		8.37	239.744	83.0052
10.323	155.403	51.1748		8.928	232.844	82.5747		8.463	238.076	81.0031
10.416	145.542	48.601		9.021	227.65	81.3837		8.556	233.316	80.0797
10.509	150.886	49.4948		9.114	224.913	80.308		8.649	228.774	79.0332
				9.207	222.412	78.4391		8.742	225.714	77.5169
				9.3	216.85	77.1738		8.835	220.894	76.3328
				9.393	216.613	75.1979		8.928	218.214	74.968
				9.486	211.928	74.0311		9.021	213.76	74.3985
				9.579	207.655	73.1125		9.114	208.812	73.7032
				9.672	204.405	71.6927		9.207	206.486	72.7547
				9.765	198.889	70.8042		9.3	201.636	71.8224
				9.858	197.373	67.8147		9.393	199.439	70.5268
				9.951	196.444	67.4431		9.486	199.951	70.2064
				10.044	190.84	66.1598		9.579	195.181	69.121
				10.137	189.829	63.3253		9.672	192.038	68.5219
				10.23	184.932	61.827		9.765	188.16	67.6765
				10.323	184.26	60.4406		9.858	187.921	66.9188
				10.416	184.007	58.8825		9.951	187.485	67.4148
				10.509	177.832	57.6378		10.044	182.601	67.0927
				10.602	176.207	55.8379		10.137	185.388	65.5446
				10.695	171.4	54.3175		10.23	180.701	65.2563
				10.788	171.578	52.6926		10.323	182.271	64.5676
				10.881	167.066	51.1738		10.416	181.508	64.6212
				10.974	162.871	50.1987		10.509	181.798	63.3602
				11.067	159.629	49.2147		10.602	179.768	62.4124
				11.16	155.088	47.4468		10.695	176.461	61.1129
				11.253	157.351	44.8934		10.788	177.96	60.1573
				11.346	153.92	43.2749		10.881	176.11	59.0392
				11.439	153.84	42.3065		10.974	175.151	56.8983
				11.532	151.645	38.8877		11.067	174.016	55.761
				11.625	146.884	37.6012		11.16	171.429	54.0671
				11.718	153.003	36.2596		11.253	172.693	55.6254
				11.811	146.376	37.2729		11.346	169.964	54.4293
				11.904	141.331	36.5927		11.439	168.691	53.4865
								11.532	166.517	53.5853
								11.625	164.045	52.6638
								11.718	164.003	52.7681
								11.811	162.363	52.4706
								11.904	163.039	51.4464
								11.997	163.371	50.9602
								12.09	159.096	50.8579
								12.183	157.78	52.7929
								12.276	154.003	52.3721
								12.369	155.511	50.5858
								12.462	151.754	50.3893
								12.555	147.997	50.3488
								12.648	149.536	50.244
								12.741	146.035	48.8006
								12.834	144.282	47.3761
								12.927	144.435	47.0455
								13.02	143.292	45.3793
								13.113	143.051	44.2359
								13.206	144.513	39.4378
								13.299	139.642	36.8469
								13.392	134.771	34.4614
								13.485	129.9	32.3268

## Sheet: Speeds
pil1Δ				pil1Δ				pil1Δ
Walled cells				Walled cells				Walled cells
steady state in 0M sorbitol				steady state in 0.8M sorbitol				steady state in 1.2M sorbitol
Speed (um/s)				Speed (um/s)				Speed (um/s)
time	mean	stdev		time	mean	stdev		time	mean	stdev
-6.417	0.05992	0.0222759		-7.905	0.0685178	0.0534887		-8.37	0.100786	0.108537
-6.324	0.061488	0.0277989		-7.812	0.0649711	0.0520568		-8.277	0.0967289	0.0994303
-6.231	0.065938	0.0339117		-7.719	0.0614244	0.0544603		-8.184	0.0926722	0.090617
-6.138	0.0636257	0.0375624		-7.626	0.05574	0.0575092		-8.091	0.098914	0.0838709
-6.045	0.0690962	0.0408414		-7.533	0.0525706	0.0507852		-7.998	0.093494	0.0753977
-5.952	0.0685844	0.0450641		-7.44	0.0533441	0.0530827		-7.905	0.0823877	0.0617804
-5.859	0.0714944	0.0508381		-7.347	0.0517094	0.0558041		-7.812	0.0783877	0.0543812
-5.766	0.0744044	0.0568997		-7.254	0.0516078	0.059714		-7.719	0.0746838	0.0476392
-5.673	0.0852509	0.0700115		-7.161	0.051663	0.061434		-7.626	0.0715314	0.0407674
-5.58	0.0701743	0.0598322		-7.068	0.0580854	0.0702577		-7.533	0.07463	0.0405266
-5.487	0.0692971	0.0571774		-6.975	0.0615728	0.0472422		-7.44	0.0684372	0.0418224
-5.394	0.066119	0.0547222		-6.882	0.05922	0.0425364		-7.347	0.0705771	0.045171
-5.301	0.0649783	0.0508385		-6.789	0.0575451	0.0365447		-7.254	0.0670303	0.0430476
-5.208	0.0636407	0.0489633		-6.696	0.0556251	0.0317481		-7.161	0.0647507	0.0397686
-5.115	0.063571	0.0511321		-6.603	0.0531712	0.0275382		-7.068	0.066474	0.0494829
-5.022	0.0641186	0.0523388		-6.51	0.0533554	0.029808		-6.975	0.0645326	0.0476669
-4.929	0.0619402	0.0517077		-6.417	0.0513709	0.0276701		-6.882	0.0631448	0.0464093
-4.836	0.0629727	0.0561763		-6.324	0.0501644	0.0272845		-6.789	0.0613389	0.0452762
-4.743	0.0638661	0.0596947		-6.231	0.0498509	0.0272429		-6.696	0.0605105	0.044455
-4.65	0.0609435	0.056672		-6.138	0.0480493	0.0271103		-6.603	0.0594114	0.0414976
-4.557	0.0587782	0.053885		-6.045	0.0471935	0.0281376		-6.51	0.0581729	0.0393886
-4.464	0.0575424	0.054443		-5.952	0.0458997	0.0265467		-6.417	0.0580753	0.0381694
-4.371	0.0555735	0.0526321		-5.859	0.0456087	0.0265359		-6.324	0.0603756	0.0453615
-4.278	0.0543961	0.0487426		-5.766	0.0449956	0.0259535		-6.231	0.0592922	0.0446854
-4.185	0.0525165	0.0441815		-5.673	0.0445198	0.024747		-6.138	0.0584091	0.0435541
-4.092	0.0506503	0.0408947		-5.58	0.044412	0.0247796		-6.045	0.0582833	0.0430463
-3.999	0.0492929	0.0391612		-5.487	0.0434188	0.023792		-5.952	0.0578745	0.0424583
-3.906	0.0487664	0.0384927		-5.394	0.0429539	0.023887		-5.859	0.0580757	0.0427911
-3.813	0.0476471	0.0398018		-5.301	0.0428004	0.025056		-5.766	0.0572377	0.0427671
-3.72	0.0458698	0.0386227		-5.208	0.0423236	0.0253973		-5.673	0.0568924	0.0414254
-3.627	0.044802	0.0365699		-5.115	0.0427249	0.026467		-5.58	0.0566879	0.0406334
-3.534	0.0438075	0.0353955		-5.022	0.041854	0.0251414		-5.487	0.0564826	0.0396563
-3.441	0.0427194	0.0346484		-4.929	0.0414161	0.0245395		-5.394	0.0554738	0.0385305
-3.348	0.0418891	0.03373		-4.836	0.0414569	0.0246874		-5.301	0.0541545	0.0377254
-3.255	0.0416163	0.0338697		-4.743	0.0411809	0.0247112		-5.208	0.0526241	0.0369686
-3.162	0.0414216	0.0342989		-4.65	0.0402512	0.0236798		-5.115	0.0514727	0.0360781
-3.069	0.0407746	0.0351152		-4.557	0.039882	0.0229342		-5.022	0.0514525	0.0367611
-2.976	0.0404769	0.0365828		-4.464	0.0389512	0.0219794		-4.929	0.0508448	0.0366845
-2.883	0.0402807	0.037029		-4.371	0.0378749	0.0213399		-4.836	0.0500979	0.0364454
-2.79	0.0413203	0.0425134		-4.278	0.0370317	0.020997		-4.743	0.0503207	0.040234
-2.697	0.0410168	0.0408678		-4.185	0.0365031	0.0213465		-4.65	0.0501182	0.0400571
-2.604	0.0407935	0.0401164		-4.092	0.0360664	0.0210962		-4.557	0.0492393	0.0380931
-2.511	0.0410928	0.0397309		-3.999	0.0353269	0.0211064		-4.464	0.0484178	0.0365139
-2.418	0.0413424	0.0386669		-3.906	0.0346981	0.020477		-4.371	0.047601	0.034249
-2.325	0.0417027	0.0384619		-3.813	0.0345337	0.0204785		-4.278	0.0469602	0.0326365
-2.232	0.042912	0.0396233		-3.72	0.0342519	0.0202366		-4.185	0.0464339	0.0312015
-2.139	0.0438082	0.0403906		-3.627	0.0341507	0.0199906		-4.092	0.0458309	0.0294148
-2.046	0.0446873	0.0412599		-3.534	0.0340984	0.0200612		-3.999	0.044941	0.0279558
-1.953	0.045703	0.0402366		-3.441	0.0343064	0.0205701		-3.906	0.0442634	0.0271051
-1.86	0.0469418	0.0401496		-3.348	0.03443	0.0211676		-3.813	0.0436528	0.026678
-1.767	0.0490331	0.0397452		-3.255	0.0345029	0.0216382		-3.72	0.0433059	0.0266737
-1.674	0.0511038	0.0403304		-3.162	0.0347772	0.0216637		-3.627	0.0430755	0.0269175
-1.581	0.0530279	0.0392716		-3.069	0.0350951	0.0220927		-3.534	0.0428058	0.0275273
-1.488	0.0549806	0.0391645		-2.976	0.0355306	0.0225275		-3.441	0.0426747	0.0276984
-1.395	0.0571444	0.0399643		-2.883	0.0359422	0.0223417		-3.348	0.0427875	0.0283309
-1.302	0.0594846	0.0411546		-2.79	0.0363791	0.0224323		-3.255	0.0432206	0.0295961
-1.209	0.0619455	0.0432874		-2.697	0.0370412	0.0225556		-3.162	0.0441886	0.032445
-1.116	0.0642371	0.0461155		-2.604	0.0376851	0.0224152		-3.069	0.0449293	0.0335589
-1.023	0.0662444	0.0468477		-2.511	0.0383576	0.022497		-2.976	0.0454271	0.0336356
-0.93	0.0680166	0.0481541		-2.418	0.0390815	0.0229708		-2.883	0.0458835	0.0335093
-0.837	0.069719	0.048171		-2.325	0.03993	0.0237054		-2.79	0.0466781	0.0345201
-0.744	0.0714088	0.049211		-2.232	0.040949	0.0236248		-2.697	0.0475183	0.033949
-0.651	0.0732332	0.0505147		-2.139	0.0419875	0.0239466		-2.604	0.0482571	0.0336874
-0.558	0.0749524	0.0513483		-2.046	0.0431111	0.0242915		-2.511	0.0488838	0.0325709
-0.465	0.0767067	0.0527325		-1.953	0.0444302	0.0249222		-2.418	0.049656	0.0318859
-0.372	0.0778461	0.0526554		-1.86	0.0459741	0.0259528		-2.325	0.0504321	0.0314129
-0.279	0.0790037	0.0535737		-1.767	0.0474617	0.0268445		-2.232	0.0513148	0.0311141
-0.186	0.0805694	0.055243		-1.674	0.0489409	0.0280126		-2.139	0.0521648	0.03098
-0.093	0.0824182	0.0570353		-1.581	0.0504804	0.0288702		-2.046	0.0531583	0.031222
0	0.0844229	0.0594032		-1.488	0.0520876	0.0299949		-1.953	0.0542036	0.0316062
0.093	0.0860801	0.0594789		-1.395	0.0537398	0.0314389		-1.86	0.0553773	0.0322248
0.186	0.0877634	0.0602824		-1.302	0.0555488	0.0317749		-1.767	0.0566017	0.03209
0.279	0.0889527	0.0613187		-1.209	0.0573872	0.0326274		-1.674	0.0578608	0.0322018
0.372	0.0901094	0.0607578		-1.116	0.0591177	0.0337315		-1.581	0.059151	0.0327517
0.465	0.0911305	0.0608029		-1.023	0.0608174	0.0347546		-1.488	0.0601681	0.0333016
0.558	0.0926365	0.0609734		-0.93	0.0623696	0.035946		-1.395	0.0612385	0.0343346
0.651	0.0938212	0.0609472		-0.837	0.0639078	0.0368597		-1.302	0.0618853	0.03412
0.744	0.0950288	0.061422		-0.744	0.0654333	0.0380144		-1.209	0.0626279	0.0343731
0.837	0.0958607	0.061983		-0.651	0.0669237	0.0393375		-1.116	0.0632908	0.0349691
0.93	0.0966444	0.0622449		-0.558	0.068234	0.0400834		-1.023	0.0639115	0.0356528
1.023	0.0967831	0.0618322		-0.465	0.069446	0.0409567		-0.93	0.0645707	0.0364133
1.116	0.097279	0.0620315		-0.372	0.07004	0.0407149		-0.837	0.0653836	0.0374535
1.209	0.0978447	0.062737		-0.279	0.0706794	0.0410266		-0.744	0.0656822	0.0370065
1.302	0.0985287	0.0639116		-0.186	0.0714975	0.041762		-0.651	0.0661312	0.0367545
1.395	0.0992796	0.0657762		-0.093	0.0721494	0.041504		-0.558	0.0667502	0.0369715
1.488	0.0994465	0.066523		0	0.0727367	0.0415645		-0.465	0.0673615	0.0376235
1.581	0.0996862	0.0678724		0.093	0.0733228	0.041492		-0.372	0.068389	0.0383132
1.674	0.0995356	0.0677351		0.186	0.0739914	0.0420268		-0.279	0.0695351	0.0392462
1.767	0.0996517	0.068267		0.279	0.0746461	0.0430371		-0.186	0.0706992	0.0409165
1.86	0.0996584	0.0689164		0.372	0.075338	0.0442972		-0.093	0.0718313	0.042541
1.953	0.0994065	0.0672613		0.465	0.0761772	0.0462176		0	0.0728287	0.0434884
2.046	0.0997532	0.0660899		0.558	0.0772278	0.0463853		0.093	0.0737072	0.0434152
2.139	0.100498	0.0652277		0.651	0.0786317	0.0473926		0.186	0.0749169	0.0437129
2.232	0.101276	0.0646575		0.744	0.0798121	0.0485841		0.279	0.0758698	0.0443762
2.325	0.101968	0.0649589		0.837	0.0812776	0.0499025		0.372	0.0767988	0.0450248
2.418	0.102806	0.0653842		0.93	0.0827614	0.0512751		0.465	0.0776283	0.0457407
2.511	0.103467	0.0667773		1.023	0.0841365	0.0522916		0.558	0.0781425	0.0457778
2.604	0.104678	0.0684349		1.116	0.0853892	0.0535293		0.651	0.0785823	0.0456245
2.697	0.105972	0.0704844		1.209	0.0867069	0.0545175		0.744	0.079025	0.0457772
2.79	0.107479	0.073062		1.302	0.0880248	0.0558711		0.837	0.0797709	0.046581
2.883	0.108589	0.0730255		1.395	0.0889795	0.0574511		0.93	0.0805901	0.0477833
2.976	0.109728	0.0733819		1.488	0.0890589	0.056507		1.023	0.0813759	0.0477975
3.069	0.110665	0.0739498		1.581	0.0896696	0.056475		1.116	0.0821489	0.0477647
3.162	0.111554	0.0736004		1.674	0.0903602	0.0567474		1.209	0.0833108	0.0479519
3.255	0.113067	0.0745433		1.767	0.0906245	0.0564088		1.302	0.0843282	0.0485497
3.348	0.114623	0.0761123		1.86	0.0909545	0.0565198		1.395	0.0853804	0.0495573
3.441	0.116313	0.0782538		1.953	0.0914314	0.0564285		1.488	0.0865149	0.0501679
3.534	0.11726	0.0797743		2.046	0.0920564	0.0570985		1.581	0.0875821	0.0510519
3.627	0.118114	0.0809256		2.139	0.0926676	0.0582452		1.674	0.0888792	0.0522929
3.72	0.118182	0.0819235		2.232	0.093278	0.0598474		1.767	0.0896304	0.0525448
3.813	0.118495	0.0810932		2.325	0.0940722	0.0618185		1.86	0.0899146	0.0513117
3.906	0.119186	0.0804955		2.418	0.0945549	0.060987		1.953	0.0904295	0.05167
3.999	0.119851	0.0803996		2.511	0.095103	0.0602579		2.046	0.0912837	0.0523227
4.092	0.120289	0.0792994		2.604	0.0956594	0.0595103		2.139	0.0916519	0.0529111
4.185	0.119609	0.0770913		2.697	0.0964088	0.0589019		2.232	0.0921954	0.0538737
4.278	0.119546	0.0761456		2.79	0.0972282	0.0585526		2.325	0.0926177	0.0552011
4.371	0.119404	0.0755115		2.883	0.0978948	0.0576321		2.418	0.0933518	0.0561555
4.464	0.119597	0.0755286		2.976	0.0984658	0.0574905		2.511	0.0939704	0.057752
4.557	0.118998	0.0760115		3.069	0.099015	0.0581258		2.604	0.0942155	0.0586231
4.65	0.120305	0.0778855		3.162	0.0996218	0.0592615		2.697	0.0948506	0.0595173
4.743	0.120378	0.0757947		3.255	0.100543	0.0612854		2.79	0.0952404	0.0602452
4.836	0.121451	0.0739974		3.348	0.101283	0.061266		2.883	0.0956981	0.060149
4.929	0.123201	0.0730309		3.441	0.102258	0.0622844		2.976	0.0960151	0.0602405
5.022	0.125066	0.0722721		3.534	0.103258	0.0636186		3.069	0.0963963	0.0602461
5.115	0.126366	0.0718402		3.627	0.104218	0.0647467		3.162	0.0969357	0.0605477
5.208	0.127647	0.0714358		3.72	0.104787	0.0651308		3.255	0.0977655	0.0616515
5.301	0.129416	0.0719745		3.813	0.10523	0.0644121		3.348	0.0979611	0.0605354
5.394	0.130863	0.0734496		3.906	0.105277	0.0641407		3.441	0.0982229	0.059708
5.487	0.133301	0.0761387		3.999	0.105769	0.0647827		3.534	0.0987138	0.0592876
5.58	0.13473	0.0794655		4.092	0.106227	0.0659352		3.627	0.0989853	0.0591185
5.673	0.136347	0.0804414		4.185	0.106218	0.0667829		3.72	0.0997355	0.058848
5.766	0.137862	0.0810999		4.278	0.106082	0.066107		3.813	0.0987964	0.0550091
5.859	0.139013	0.0810237		4.371	0.106369	0.0665772		3.906	0.0990691	0.0539462
5.952	0.139904	0.0801964		4.464	0.106598	0.0668646		3.999	0.0995879	0.054005
6.045	0.14035	0.080693		4.557	0.106775	0.0666662		4.092	0.0998763	0.0541962
6.138	0.141715	0.0807123		4.65	0.107196	0.0670713		4.185	0.100335	0.0553652
6.231	0.141906	0.0811527		4.743	0.108063	0.0669074		4.278	0.101129	0.0560862
6.324	0.141353	0.0805977		4.836	0.109003	0.0671203		4.371	0.102064	0.0570688
6.417	0.140563	0.0810974		4.929	0.109833	0.067113		4.464	0.103078	0.0583397
6.51	0.139799	0.0825457		5.022	0.109973	0.0665159		4.557	0.104091	0.0597104
6.603	0.137895	0.0790375		5.115	0.110464	0.0671964		4.65	0.105223	0.0608084
6.696	0.137367	0.0782008		5.208	0.111821	0.0667373		4.743	0.106977	0.0615153
6.789	0.137041	0.0772344		5.301	0.113223	0.0671334		4.836	0.108332	0.0615328
6.882	0.13715	0.0768179		5.394	0.114624	0.0669604		4.929	0.109727	0.0614879
6.975	0.138335	0.0775662		5.487	0.116109	0.0672056		5.022	0.111107	0.0616391
7.068	0.13879	0.0781528		5.58	0.117071	0.067979		5.115	0.111943	0.0613683
7.161	0.139873	0.0795284		5.673	0.11837	0.0679001		5.208	0.113019	0.0617531
7.254	0.142029	0.0823611		5.766	0.119509	0.0683557		5.301	0.113753	0.0623906
7.347	0.144545	0.0855748		5.859	0.120289	0.0686545		5.394	0.114487	0.0637165
7.44	0.14648	0.0891147		5.952	0.121557	0.0698961		5.487	0.114911	0.0647208
7.533	0.147267	0.089449		6.045	0.123034	0.0715323		5.58	0.11524	0.0660794
7.626	0.148648	0.0893734		6.138	0.12356	0.071564		5.673	0.11485	0.0650803
7.719	0.150127	0.0885663		6.231	0.124398	0.0720704		5.766	0.114904	0.0638921
7.812	0.150587	0.0866956		6.324	0.125425	0.0725893		5.859	0.115193	0.0630351
7.905	0.151549	0.0859115		6.417	0.126524	0.0730814		5.952	0.114665	0.0624446
7.998	0.150911	0.0837708		6.51	0.126647	0.0733718		6.045	0.115115	0.0631256
8.091	0.152023	0.0850079		6.603	0.127797	0.0732283		6.138	0.115022	0.062626
8.184	0.150952	0.0840549		6.696	0.128561	0.0738638		6.231	0.11534	0.0625966
8.277	0.149501	0.0858176		6.789	0.129559	0.0749588		6.324	0.115829	0.0636532
8.37	0.149663	0.0900112		6.882	0.130386	0.0769224		6.417	0.116734	0.0650697
8.463	0.150789	0.0859688		6.975	0.130077	0.077061		6.51	0.117856	0.0672576
8.556	0.155157	0.0868213		7.068	0.132	0.0773576		6.603	0.118653	0.0677336
8.649	0.159509	0.087595		7.161	0.133344	0.0779098		6.696	0.119642	0.0676535
8.742	0.158329	0.0823061		7.254	0.134839	0.0778549		6.789	0.120439	0.0681242
8.835	0.159524	0.0819172		7.347	0.134335	0.0765574		6.882	0.1213	0.0685411
8.928	0.161224	0.0826531		7.44	0.135038	0.0767932		6.975	0.122686	0.0702116
9.021	0.162846	0.0826675		7.533	0.135902	0.0766673		7.068	0.123082	0.0686215
9.114	0.164163	0.0846962		7.626	0.137384	0.0780459		7.161	0.124282	0.0684236
9.207	0.168304	0.0881462		7.719	0.138242	0.0794303		7.254	0.125996	0.0686706
9.3	0.168347	0.088873		7.812	0.139597	0.0815276		7.347	0.126817	0.0685334
9.393	0.16779	0.0845937		7.905	0.141119	0.084948		7.44	0.127886	0.0698277
9.486	0.168658	0.0845501		7.998	0.139119	0.0813357		7.533	0.127453	0.068192
9.579	0.172476	0.0820436		8.091	0.139575	0.0808493		7.626	0.129056	0.0693274
9.672	0.173824	0.0834495		8.184	0.140853	0.0801227		7.719	0.130766	0.0702224
9.765	0.174933	0.0861263		8.277	0.142816	0.0789129		7.812	0.131362	0.0706807
9.858	0.17344	0.0878656		8.37	0.145026	0.0789815		7.905	0.132979	0.0728478
9.951	0.171661	0.0923635		8.463	0.145515	0.0773898		7.998	0.132689	0.07174
10.044	0.172124	0.0869031		8.556	0.146863	0.0775034		8.091	0.134148	0.0720595
10.137	0.172652	0.0939101		8.649	0.148193	0.0786261		8.184	0.135978	0.0734081
10.23	0.174171	0.0998142		8.742	0.149291	0.0799261		8.277	0.137559	0.074375
10.323	0.164835	0.0944828		8.835	0.150535	0.0833724		8.37	0.139863	0.0753534
10.416	0.165553	0.0870813		8.928	0.147948	0.0819423		8.463	0.139733	0.0748804
10.509	0.156126	0.0887027		9.021	0.148589	0.083901		8.556	0.140618	0.075271
10.602	0.198438	0.0729018		9.114	0.148907	0.0853504		8.649	0.142076	0.0758174
10.695	0.199457	0.0669973		9.207	0.147363	0.0818486		8.742	0.142446	0.0754651
10.788	0.200475	0.0634036		9.3	0.148108	0.0823781		8.835	0.14316	0.0767915
10.881	0.201493	0.0625204		9.393	0.147739	0.0804448		8.928	0.144809	0.0755385
10.974	0.202512	0.0644593		9.486	0.146585	0.0776858		9.021	0.144978	0.0754178
11.067	0.203258	0.072044		9.579	0.148282	0.079385		9.114	0.145064	0.0750322
11.16	0.212096	0.0781485		9.672	0.145871	0.0794919		9.207	0.14313	0.0724411
11.253	0.197302	0.0799639		9.765	0.146898	0.0825767		9.3	0.142648	0.0731038
11.346	NaN	0.0828017		9.858	0.147028	0.0820613		9.393	0.142957	0.0733573
11.439	NaN	0.0904915		9.951	0.149218	0.0815213		9.486	0.142329	0.0717607
11.532	NaN	0.0189895		10.044	0.150808	0.0827824		9.579	0.142658	0.071358
11.625	NaN	0.0308511		10.137	0.151146	0.0819687		9.672	0.142385	0.071546
11.718	NaN	0.0427912		10.23	0.152801	0.0835842		9.765	0.143073	0.0728966
11.811	NaN	0.0547586		10.323	0.149292	0.079447		9.858	0.139741	0.0701708
11.904	NaN	0.0667385		10.416	0.150406	0.0780484		9.951	0.138357	0.0693039
11.997	NaN	0.0787253		10.509	0.151148	0.0792284		10.044	0.138775	0.0705976
12.09	NaN	0.0907162		10.602	0.152479	0.0816671		10.137	0.134528	0.0688213
				10.695	0.154084	0.0857054		10.23	0.135595	0.0715393
				10.788	0.155131	0.0832111		10.323	0.135147	0.0707408
				10.881	0.157338	0.083767		10.416	0.13625	0.0723407
				10.974	0.155401	0.0808583		10.509	0.138904	0.0749972
				11.067	0.155314	0.0778981		10.602	0.138555	0.0780893
				11.16	0.155914	0.0797363		10.695	0.140542	0.0833281
				11.253	0.156851	0.0829549		10.788	0.139173	0.0822269
				11.346	0.161352	0.0862729		10.881	0.138741	0.0815324
				11.439	0.159813	0.0842861		10.974	0.140146	0.0829152
				11.532	0.151901	0.0780978		11.067	0.143378	0.0819809
				11.625	0.154262	0.0841688		11.16	0.141355	0.0792892
				11.718	0.148446	0.0707079		11.253	0.139449	0.0744334
				11.811	0.157197	0.0796984		11.346	0.138565	0.0715834
				11.904	0.161114	0.0847921		11.439	0.133128	0.0650357
				11.997	0.131327	0.0741193		11.532	0.135414	0.0614412
				12.09	0.135624	0.0808523		11.625	0.132959	0.0627818
				12.183	0.122478	0.0634253		11.718	0.138669	0.0635842
				12.276	0.125496	0.0696555		11.811	0.139248	0.0679635
				12.369	0.128332	0.0770055		11.904	0.136654	0.0665204
				12.462	0.131167	0.0850717		11.997	0.138229	0.069277
				12.555	0.13353	0.101493		12.09	0.140292	0.0733322
				12.648	0.153097	0.132073		12.183	0.133806	0.0719372
				12.741	0.150016	0.128292		12.276	0.138623	0.0714884
				12.834	0.140976	0.112683		12.369	0.139007	0.0683203
				12.927	0.136792	0.0967965		12.462	0.140664	0.0724373
				13.02	0.132608	0.0818368		12.555	0.142915	0.0777162
				13.113	0.128424	0.0684143		12.648	0.148983	0.0839528
				13.206	0.12424	0.0576136		12.741	0.149489	0.089377
								12.834	0.152056	0.0974631
								12.927	0.146593	0.0843945
								13.02	0.143973	0.0915043
								13.113	0.12663	0.0805947
								13.206	0.158822	0.0526997
								13.299	0.154718	0.0523877
								13.392	0.150615	0.0541825
								13.485	0.146511	0.0578886

## Sheet: ANOVA (#)
One -way ANOVA at time 0s
Significance level	α =	0.05
	mean	stdev	N
steady state in 0M sorbitol	821.521	214.575	342
steady state in 0.8M sorbitol	760.604	217.54	516
steady state in 1.2M sorbitol	697.008	175.079	514
						ANOVA between 0M and 0.8M	ANOVA between 0M and 1.2M	ANOVA between 0.8M and 1.2M
Overall mean	m=	751.963				784.886	746.755	728.867
Between-group degrees of freedom	dfb=	2				1	1	1
Between-group mean square value	MSb=	1.62278e+06				763268	3.18382e+06	1.04144e+06
Within-group degrees of freedom	dfw=	1369				856	854	1028
Within-group mean square value	MSw=	40757.5				46813.3	36797.7	39004.5
F-ratio	F=	39.8156				16.3045	86.5223	26.7004
Critical value	Fcrit=	3.0023				3.85235	3.85237	3.85052
p-value	p=	0				5.87738e-05	0	2.85296e-07
The difference between conditions is statistically significant						The difference between all pairs of conditions are statistically significant
