# Supplementary material for: Rapid adaptation of endocytosis, exocytosis, and eisosomes after an acute increase in membrane tension in yeast cells
Source: eLife. 2021 May 13;10:e62084. doi: 10.7554/eLife.62084 (PMC9045820; doi:10.7554/eLife.62084)
Supplement: Figure 6—source data 4. [file elife-62084-fig6-data4.xlsx]

## Sheet: Number of molecules
WT				WT				WT				WT				WT
Walled cells				Walled cells				Walled cells				Walled cells				Walled cells
ΔP=-1.2 M				ΔP=-1.2 M				ΔP=-1.2 M				ΔP=-1.2 M				Steady state in 1.2 M sorbitol
0 min				2 min				4 min				6 min
N=	103			N=	169			N=	190			N=	153			N=	354
Number of molecules (#)				Number of molecules (#)				Number of molecules (#)				Number of molecules (#)				Number of molecules (#)
time	mean	stdev		time	mean	stdev		time	mean	stdev		time	mean	stdev		time	mean	stdev
-5.859	136.037	83.1024		-5.58	157.622	136.23		-6.51	143.832	56.6668		-6.975	130.474	70.6706		-7.44	111.721	76.1158
-5.766	147.153	83.6785		-5.487	161.445	128.418		-6.417	148.331	62.1479		-6.882	137.948	72.3029		-7.347	122.151	80.444
-5.673	151.307	82.1184		-5.394	158.35	121.106		-6.324	154.777	65.1818		-6.789	147.2	75.7509		-7.254	128.219	78.8293
-5.58	149.32	78.4188		-5.301	162.788	116.739		-6.231	156.756	65.0062		-6.696	156.451	79.2627		-7.161	131.666	77.0875
-5.487	160.602	79.2381		-5.208	170.263	112.001		-6.138	157.212	70.7661		-6.603	153.132	75.0653		-7.068	136.978	73.646
-5.394	153.218	76.815		-5.115	173.185	108.412		-6.045	158.573	68.5831		-6.51	162.791	77.9697		-6.975	138.245	70.9204
-5.301	157.93	79.5757		-5.022	183.923	110.707		-5.952	162.271	71.7574		-6.417	172.231	80.8255		-6.882	144.103	72.2109
-5.208	166.631	79.7211		-4.929	191.125	111.058		-5.859	169.731	75.8972		-6.324	176.412	83.4531		-6.789	150.825	72.0427
-5.115	168.839	82.1498		-4.836	195.84	108.817		-5.766	176.809	78.0283		-6.231	178.574	84.9939		-6.696	155.445	71.5715
-5.022	173.943	83.9164		-4.743	205.937	108.594		-5.673	179.587	81.9867		-6.138	184.034	85.5241		-6.603	161.713	72.1689
-4.929	185.897	93.0279		-4.65	213.534	106.919		-5.58	182.854	81.4672		-6.045	188.376	87.0339		-6.51	164.659	74.1174
-4.836	193.434	92.7084		-4.557	223.177	106.884		-5.487	188.919	84.3072		-5.952	187.344	90.5085		-6.417	168.645	74.7841
-4.743	202.475	93.1474		-4.464	233.996	107.241		-5.394	186.12	89.3122		-5.859	190.883	91.9514		-6.324	172.78	76.4453
-4.65	213.067	94.8604		-4.371	245.531	107.879		-5.301	189.766	88.3496		-5.766	193.595	93.2414		-6.231	177.915	77.2177
-4.557	222.348	95.7469		-4.278	258.347	107.6		-5.208	194.786	88.9902		-5.673	197.654	92.8813		-6.138	182.25	78.572
-4.464	219.653	97.1834		-4.185	258.577	111.46		-5.115	193.911	90.9074		-5.58	194.031	95.5326		-6.045	185.415	78.7268
-4.371	223.183	100.349		-4.092	263.232	113.056		-5.022	196.724	92.3528		-5.487	196.233	99.0914		-5.952	190.463	81.409
-4.278	236.18	101.254		-3.999	277.651	114.044		-4.929	203.376	93.4416		-5.394	202.948	98.5046		-5.859	196.039	83.1563
-4.185	248.844	101.904		-3.906	289.217	114.468		-4.836	212.86	95.097		-5.301	212.827	98.7826		-5.766	203.487	84.3678
-4.092	261.822	102.372		-3.813	302.981	114.796		-4.743	222.259	98.2019		-5.208	222.832	98.9571		-5.673	210.268	85.4092
-3.999	271.418	104.563		-3.72	316.582	115.895		-4.65	226.041	99.7567		-5.115	228.184	100.825		-5.58	217.356	86.8057
-3.906	283.321	107.344		-3.627	328.716	118.563		-4.557	236.439	105.109		-5.022	237.977	102.168		-5.487	224.777	88.6995
-3.813	295.183	109.365		-3.534	342.154	120.652		-4.464	244.624	108.232		-4.929	246.466	102.723		-5.394	232.544	90.0418
-3.72	308.435	110.811		-3.441	356.448	122.434		-4.371	254.713	110.786		-4.836	255.188	104.493		-5.301	241.673	91.6762
-3.627	322.358	113.053		-3.348	373.245	124.343		-4.278	265.914	112.299		-4.743	266.154	103.912		-5.208	251.053	93.1537
-3.534	337.03	115.18		-3.255	389.417	126.386		-4.185	277.959	114.289		-4.65	271.134	105.797		-5.115	258.934	96.4083
-3.441	352.519	117.363		-3.162	404.104	128.408		-4.092	287.137	116.506		-4.557	282.319	107.576		-5.022	268.79	98.0357
-3.348	368.266	119.526		-3.069	419.909	130.232		-3.999	299.642	119.238		-4.464	296.37	109.137		-4.929	277.963	100.205
-3.255	385.575	121.901		-2.976	436.417	131.501		-3.906	311.743	121.514		-4.371	310.575	110.571		-4.836	287.913	101.922
-3.162	401.538	124.002		-2.883	454.119	134.023		-3.813	325.902	123.159		-4.278	324.913	112.214		-4.743	298.915	103.273
-3.069	417.8	126.746		-2.79	471.986	137.032		-3.72	340.29	125.21		-4.185	337.511	117.203		-4.65	309.537	105.013
-2.976	431.598	130.725		-2.697	489.098	139.954		-3.627	351.679	128.21		-4.092	352.368	118.171		-4.557	318.248	107.25
-2.883	448.88	132.821		-2.604	507.475	142.997		-3.534	364.456	130.65		-3.999	366.745	120.029		-4.464	328.811	108.371
-2.79	465.994	135.665		-2.511	525.962	146.117		-3.441	376.727	132.037		-3.906	381.696	121.479		-4.371	340.988	109.15
-2.697	483.129	138.374		-2.418	544.53	148.98		-3.348	390.895	133.628		-3.813	396.484	123.351		-4.278	352.729	110.177
-2.604	500.112	141.283		-2.325	562.912	152.261		-3.255	405.671	135.941		-3.72	411.468	126.775		-4.185	363.824	111.396
-2.511	517.386	144.349		-2.232	580.093	155.513		-3.162	421.072	138.365		-3.627	421.811	131.448		-4.092	374.572	113.215
-2.418	534.767	147.508		-2.139	598.714	158.394		-3.069	436.688	140.855		-3.534	436.686	133.571		-3.999	386.36	114.165
-2.325	552.2	150.841		-2.046	616.448	160.708		-2.976	452.291	143.099		-3.441	451.85	136.313		-3.906	398.62	115.194
-2.232	570.014	154.018		-1.953	634.814	162.909		-2.883	468.011	145.777		-3.348	467.108	138.986		-3.813	410.97	116.5
-2.139	587.944	157.296		-1.86	652.223	164.825		-2.79	483.751	148.55		-3.255	482.418	141.722		-3.72	422.835	117.751
-2.046	605.43	159.768		-1.767	669.439	167.143		-2.697	497.702	151.668		-3.162	495.029	146.763		-3.627	435.735	119.305
-1.953	623.234	162.227		-1.674	686.274	169.629		-2.604	513.789	153.26		-3.069	511.008	150.057		-3.534	448.337	120.6
-1.86	640.918	164.683		-1.581	702.357	171.851		-2.511	530.903	154.775		-2.976	527.684	152.901		-3.441	461.161	122.393
-1.767	658.804	167.561		-1.488	718.01	174.214		-2.418	547.646	156.159		-2.883	543.939	156.333		-3.348	474.317	124.725
-1.674	676.595	170.65		-1.395	733.397	176.549		-2.325	564.056	157.917		-2.79	560.05	159.822		-3.255	486.886	126.962
-1.581	693.998	173.821		-1.302	739.592	187.193		-2.232	579.585	160.63		-2.697	576.81	162.904		-3.162	500.652	129.583
-1.488	710.76	177.21		-1.209	752.116	190.607		-2.139	596.655	163.089		-2.604	593.921	166.072		-3.069	514.876	132.352
-1.395	726.653	179.995		-1.116	763.97	193.932		-2.046	614.183	165.666		-2.511	610.922	168.7		-2.976	528.825	135.283
-1.302	742.137	182.688		-1.023	774.048	196.16		-1.953	631.736	168.334		-2.418	628.017	171.022		-2.883	542.967	138.088
-1.209	756.964	185.707		-0.93	783.454	197.944		-1.86	649.377	170.713		-2.325	643.631	174.169		-2.79	557.418	141.367
-1.116	769.576	186.788		-0.837	791.413	199.777		-1.767	664.932	173.078		-2.232	658.533	177.844		-2.697	572.302	144.183
-1.023	781.095	188.38		-0.744	798.527	201.492		-1.674	681.858	175.755		-2.139	675.263	180.744		-2.604	587.068	147.008
-0.93	791.824	189.659		-0.651	804.633	203.426		-1.581	698.239	178.176		-2.046	692.03	183.831		-2.511	601.394	150.829
-0.837	801.392	190.607		-0.558	810.432	205.459		-1.488	714.096	180.064		-1.953	708.536	186.868		-2.418	616.617	153.637
-0.744	810.562	191.883		-0.465	815.688	207.861		-1.395	729.174	181.994		-1.86	724.682	189.9		-2.325	631.697	156.496
-0.651	816.746	193.944		-0.372	814.644	213.408		-1.302	738.829	188.971		-1.767	734.12	194.98		-2.232	646.155	159.248
-0.558	822.047	196.274		-0.279	817.679	215.068		-1.209	751.917	190.799		-1.674	747.725	197.083		-2.139	660.969	162.31
-0.465	826.948	198.656		-0.186	820.217	216.827		-1.116	764.054	192.43		-1.581	761.045	199.478		-2.046	675.496	165.483
-0.372	831.069	201.052		-0.093	821.518	217.966		-1.023	775.789	193.964		-1.488	773.937	201.943		-1.953	689.9	168.738
-0.279	834.536	203.826		0	822.49	219.056		-0.93	786.832	195.409		-1.395	786.625	204.66		-1.86	703.87	171.799
-0.186	834.176	204.813		0.093	822.003	218.435		-0.837	794.825	197.555		-1.302	794.329	207.338		-1.767	716.702	174.871
-0.093	835.453	205.638		0.186	821.205	218.021		-0.744	803.769	199.046		-1.209	804.276	209.999		-1.674	729.666	178.154
0	835.66	206.508		0.279	820.184	217.678		-0.651	811.524	200.529		-1.116	813.275	212.285		-1.581	741.883	181.082
0.093	834.933	207.017		0.372	818.742	217.505		-0.558	817.959	201.7		-1.023	821.174	214.281		-1.488	753.528	183.811
0.186	834.025	207.642		0.465	816.757	217.425		-0.465	823.798	203.255		-0.93	827.436	216.761		-1.395	764.689	186.64
0.279	827.476	212.325		0.558	813.796	218.178		-0.372	823.273	208.313		-0.837	830.502	219.854		-1.302	774.6	188.531
0.372	825.348	212.467		0.651	810.566	218.784		-0.279	826.18	209.199		-0.744	833.914	222.78		-1.209	783.793	190.266
0.465	822.813	212.764		0.744	806.822	219.317		-0.186	828.345	209.84		-0.651	836.683	225.586		-1.116	792.201	191.72
0.558	819.999	212.759		0.837	802.227	219.316		-0.093	830.054	210.548		-0.558	839.089	228.611		-1.023	800.034	193.157
0.651	816.822	212.907		0.93	797.27	219.179		0	831.118	211.506		-0.465	841.279	231.793		-0.93	807.531	194.409
0.744	812.005	212.233		1.023	791.423	218.404		0.093	830.763	212.266		-0.372	840.155	235.13		-0.837	808.201	201.418
0.837	807.065	211.818		1.116	785.466	217.732		0.186	830.153	213.145		-0.279	840.398	237.561		-0.744	813.334	202.32
0.93	802.09	211.341		1.209	779.035	216.916		0.279	828.904	213.894		-0.186	840.067	239.866		-0.651	818.123	203.379
1.023	797.035	211.006		1.302	772.279	216.249		0.372	826.755	214.369		-0.093	839.318	241.986		-0.558	821.738	204.322
1.116	791.734	210.99		1.395	765.441	215.612		0.465	824.024	214.887		0	842.85	241.637		-0.465	824.843	205.374
1.209	785.92	211.444		1.488	757.787	215.081		0.558	820.697	215.111		0.093	837.659	243.465		-0.372	827.329	206.689
1.302	779.716	212.224		1.581	750.147	214.577		0.651	817.024	215.44		0.186	834.826	243.555		-0.279	829.355	208.077
1.395	773.806	213.132		1.674	742.732	214.215		0.744	813.267	215.898		0.279	831.441	243.286		-0.186	830.864	209.395
1.488	767.005	213.92		1.767	734.663	212.836		0.837	809.325	216.404		0.372	828.092	243.156		-0.093	831.986	210.477
1.581	760.148	214.827		1.86	726.52	211.173		0.93	806.626	216.732		0.465	824.375	243.286		0	832.781	211.52
1.674	755.761	211.719		1.953	717.688	208.646		1.023	799.401	217.645		0.558	819.71	241.824		0.093	831.622	212.187
1.767	747.183	211.209		2.046	709.165	206.639		1.116	794.217	216.775		0.651	814.57	240.638		0.186	830.78	212.603
1.86	738.048	210.885		2.139	700.1	204.341		1.209	788.805	216.077		0.744	809.419	239.491		0.279	829.264	212.82
1.953	728.775	210.629		2.232	691.109	202.052		1.302	782.883	215.204		0.837	803.767	238.38		0.372	827.809	213.03
2.046	719.455	210.473		2.325	681.856	200.095		1.395	777.772	214.639		0.93	800.96	234.947		0.465	826.098	213.018
2.139	709.764	210.298		2.418	672.046	198.274		1.488	770.721	213.159		1.023	793.775	232.852		0.558	822.578	212.428
2.232	700.131	210.336		2.511	661.29	196.682		1.581	763.416	211.869		1.116	785.798	230.842		0.651	819.745	211.643
2.325	690.286	210.577		2.604	650.681	194.773		1.674	755.872	210.617		1.209	777.4	228.189		0.744	816.394	210.864
2.418	680.742	210.514		2.697	639.83	193.465		1.767	748.225	209.332		1.302	768.58	225.727		0.837	812.442	209.972
2.511	671.316	210.64		2.79	629.003	191.741		1.86	740.278	208.248		1.395	761.985	222.551		0.93	808.519	209.41
2.604	661.562	208.312		2.883	618.255	190.306		1.953	731.5	205.877		1.488	752.929	220.355		1.023	799.51	212.862
2.697	651.532	206.113		2.976	607.258	188.931		2.046	722.542	203.658		1.581	743.458	218.274		1.116	794.161	211.299
2.79	641.78	203.757		3.069	595.791	186.871		2.139	713.447	201.247		1.674	733.832	216.38		1.209	788.803	209.859
2.883	632.209	201.983		3.162	583.727	184.278		2.232	704.04	198.484		1.767	724.014	214.465		1.302	783.024	208.035
2.976	623.963	199.499		3.255	574.662	181.859		2.325	696.359	196.086		1.86	715.086	212.869		1.395	778.325	205.638
3.069	613.796	197.069		3.348	565.626	179.81		2.418	686.569	194.304		1.953	704.944	210.698		1.488	772.109	204.197
3.162	602.871	195.769		3.441	554.254	177.391		2.511	676.575	192.639		2.046	694.973	208.44		1.581	765.787	202.718
3.255	592.345	193.567		3.534	543.049	175.043		2.604	666.456	191.144		2.139	684.959	206.481		1.674	759.432	201.759
3.348	583.24	192.018		3.627	531.319	173.623		2.697	656.217	190.283		2.232	675	204.668		1.767	753.023	200.226
3.441	574.128	190.484		3.72	517.824	167.173		2.79	645.85	189.149		2.325	668.765	201.919		1.86	748.367	197.957
3.534	563.71	188.782		3.813	504.735	162.002		2.883	634.73	187.327		2.418	657.939	199.122		1.953	740.88	195.865
3.627	552.946	186.142		3.906	493.967	158.601		2.976	623.722	185.571		2.511	647.146	196.293		2.046	733.025	193.885
3.72	541.756	183.567		3.999	483.19	155.236		3.069	612.404	183.727		2.604	636.208	193.484		2.139	724.813	191.868
3.813	530.089	181.816		4.092	473.729	152.28		3.162	601.533	181.917		2.697	625.343	190.786		2.232	716.694	189.921
3.906	518.764	179.276		4.185	464.094	148.864		3.255	588.689	179.242		2.79	613.696	188.591		2.325	708.403	188.137
3.999	509.804	177.397		4.278	453.362	146.413		3.348	577.793	177.788		2.883	602.274	186.672		2.418	699.78	185.956
4.092	498.373	174.841		4.371	443.724	143.081		3.441	566.673	175.928		2.976	591.378	184.283		2.511	691.099	183.977
4.185	486.81	172.422		4.464	432.941	139.945		3.534	555.371	174		3.069	580.364	181.889		2.604	682.586	182.018
4.278	471.799	168.109		4.557	422.102	136.88		3.627	544.118	171.901		3.162	569.464	179.51		2.697	674.197	180.293
4.371	460.058	165.333		4.65	412.289	133.737		3.72	533.16	169.792		3.255	558.459	177.286		2.79	665.835	178.749
4.464	448.491	164.369		4.743	400.853	130.303		3.813	522.257	167.238		3.348	547.73	175.119		2.883	658.665	176.288
4.557	436.77	161.762		4.836	390.638	127.266		3.906	511.262	164.68		3.441	536.727	173.058		2.976	650.175	174.405
4.65	426.016	160.04		4.929	379.598	124.209		3.999	500.359	162.635		3.534	525.621	171.095		3.069	641.757	172.496
4.743	414.876	157.652		5.022	368.702	121.206		4.092	489.168	159.708		3.627	514.581	169.207		3.162	633.279	170.859
4.836	403.76	155.381		5.115	360.046	117.915		4.185	477.834	157.241		3.72	504.91	167.004		3.255	625.896	168.692
4.929	395.044	154.443		5.208	349.867	115.707		4.278	467.004	154.383		3.813	497.148	164.656		3.348	617.239	167.222
5.022	384.762	151.896		5.301	338.627	113.036		4.371	456.192	151.512		3.906	485.44	162.357		3.441	608.079	165.916
5.115	374.515	149.506		5.394	328.259	110.332		4.464	445.563	148.753		3.999	473.86	160.084		3.534	598.929	164.686
5.208	364.452	147.254		5.487	320.041	107.245		4.557	434.912	146.233		4.092	462.717	158.398		3.627	589.355	163.455
5.301	354.784	145.977		5.58	309.5	104.287		4.65	425.05	143.95		4.185	451.043	156.434		3.72	580.101	162.228
5.394	344.918	143.751		5.673	297.753	101.091		4.743	414.847	142.437		4.278	439.769	155.177		3.813	570.705	160.375
5.487	334.926	141.565		5.766	288.078	100.431		4.836	404.779	140.215		4.371	428.495	152.715		3.906	561.151	158.556
5.58	326.015	139.978		5.859	279.037	99.1665		4.929	394.567	137.877		4.464	417.546	150.304		3.999	551.473	156.8
5.673	318.907	138.218		5.952	269.312	98.3114		5.022	384.526	137.054		4.557	406.438	147.897		4.092	542.379	155.292
5.766	309.179	135.894		6.045	259.328	97.0513		5.115	374.384	134.863		4.65	397.648	144.198		4.185	532.811	153.306
5.859	305.834	135.062		6.138	263.446	92.5885		5.208	367.015	132.876		4.743	386.539	143.28		4.278	523.575	152.507
5.952	295.933	132.693		6.231	253.989	91.4334		5.301	356.842	131.299		4.836	376.919	141.888		4.371	514.263	151.152
6.045	286.762	131.165		6.324	245.776	90.8687		5.394	347.377	130.264		4.929	367.541	140.675		4.464	504.872	150.139
6.138	277.827	129.493		6.417	236.861	90.8375		5.487	337.13	128.574		5.022	357.473	138.702		4.557	496.129	149.222
6.231	273.825	126.356		6.51	227.523	89.993		5.58	326.509	126.938		5.115	347.399	136.882		4.65	487.898	148.006
6.324	262.476	123.178		6.603	214.517	66.2998		5.673	313.648	117.5		5.208	337.779	132.966		4.743	478.16	147.243
6.417	252.689	119.492		6.696	207.828	65.1872		5.766	302.613	115.389		5.301	327.539	131.242		4.836	468.784	146.002
6.51	246.095	117.47		6.789	201.62	64.1946		5.859	292.11	114.228		5.394	319.063	129.782		4.929	459.306	144.873
6.603	236.566	113.733		6.882	194.486	63.9767		5.952	283.572	111.864		5.487	309.501	128.575		5.022	450.047	143.357
6.696	228.872	110.142		6.975	187.311	63.8075		6.045	277.471	107.807		5.58	299.546	126.871		5.115	440.989	141.522
6.789	233.53	105.968		7.068	186.131	65.098		6.138	273.781	107.148		5.673	294.889	126.312		5.208	434.926	137.899
6.882	223.299	101.459		7.161	181.058	64.3863		6.231	263.59	104.749		5.766	284.581	124.847		5.301	425.796	135.7
6.975	213.029	97.0589		7.254	175.104	63.7351		6.324	254.991	102.327		5.859	276.527	124.591		5.394	417.935	133.435
7.068	205.7	94.6852		7.347	172.371	61.3893		6.417	245.466	99.778		5.952	267.363	123.659		5.487	409.092	131.102
7.161	197.274	90.6265		7.44	166.36	59.836		6.51	239.771	95.705		6.045	257.423	122.591		5.58	400.231	129.088
7.254	188.701	78.0561		7.533	177.334	57.1354		6.603	234.75	91.8462		6.138	252.899	123.12		5.673	392.475	126.667
7.347	183.887	75.8038		7.626	171.066	58.3499		6.696	227.806	89.4963		6.231	243.129	120.935		5.766	384.4	124.242
7.44	176.431	74.1564		7.719	164.385	57.0027		6.789	221.089	87.5846		6.324	233.781	119.202		5.859	376.117	121.789
7.533	174.986	71.3886		7.812	154.782	58.1927		6.882	213.997	85.3589		6.417	228.131	119.57		5.952	368.236	119.595
7.626	169.806	67.6497		7.905	136.07	36.6698		6.975	208.89	82.8495		6.51	221.582	118.665		6.045	360.051	117.306
7.719	172.35	61.4667		7.998	139.477	30.948		7.068	213.016	79.2812		6.603	228.46	119.992		6.138	351.602	115.094
7.812	162.196	59.5018		8.091	129.109	28.9611		7.161	205.147	76.509		6.696	218.922	117.758		6.231	343.663	113.158
7.905	153.927	56.8239		8.184	118.74	27.1558		7.254	199.995	73.1744		6.789	211.18	115.346		6.324	336.575	111.064
7.998	152.236	55.6666						7.347	193.942	71.0565		6.882	203.719	114.21		6.417	328.716	109.26
8.091	143.441	53.6608						7.44	188.084	68.4813		6.975	195.946	112.173		6.51	321.772	107.486
8.184	144.428	61.2362						7.533	183.621	66.6534		7.068	200.187	121.166		6.603	315.781	105.983
8.277	137.861	58.1172						7.626	176.737	64.3618		7.161	194.036	121.018		6.696	308.342	104.383
8.37	131.293	55.0464						7.719	172.536	62.0983		7.254	188.254	121.904		6.789	300.593	102.966
8.463	128.027	53.844						7.812	166.839	60.6972		7.347	185.913	123.03		6.882	293.609	101.64
8.556	130.245	46.4779						7.905	158.634	59.0229		7.44	183.173	123.614		6.975	286.217	100.296
8.649	141.229	34.7491						7.998	159.104	60.9346		7.533	198.857	140.733		7.068	281.227	97.9676
8.742	133.148	31.8691						8.091	158.395	59.191		7.626	190.338	138.697		7.161	273.708	96.4058
8.835	125.067	29.1537						8.184	155.338	56.3814		7.719	182.318	136.871		7.254	267.168	94.9146
8.928	116.986	26.6533						8.277	149.438	54.756		7.812	179.87	138.845		7.347	259.676	93.7781
9.021	108.905	24.4341						8.37	145.821	53.2561		7.905	180.992	139.193		7.44	252.339	92.4704
								8.463	140.725	55.1527		7.998	183.803	145.974		7.533	247.17	90.5792
								8.556	131.605	57.1604		8.091	179.109	144.893		7.626	240.887	89.3288
								8.649	129.467	57.5604		8.184	178.139	141.724		7.719	235.269	88.0365
								8.742	134.851	59.3249		8.277	188.606	144.741		7.812	230.986	86.0893
								8.835	127.037	57.2301		8.37	181.16	139.333		7.905	223.948	84.5816
								8.928	136.57	67.4587		8.463	196.376	160.434		7.998	221.289	82.871
								9.021	128.662	64.8413		8.556	187.872	153.847		8.091	215.384	82.2048
								9.114	120.754	62.2725		8.649	179.961	147.105		8.184	208.633	81.6536
												8.742	172.051	140.43		8.277	206.8	79.4073
												8.835	164.14	133.832		8.37	200.004	78.2954
																8.463	196.459	72.6521
																8.556	190.836	71.8759
																8.649	185.305	70.7379
																8.742	183.73	69.5889
																8.835	177.096	68.0898
																8.928	176.104	67.9567
																9.021	172.866	66.638
																9.114	167.952	65.1752
																9.207	163.402	63.7395
																9.3	157.778	62.0527
																9.393	154.842	60.9443
																9.486	155.105	59.4644
																9.579	153.934	58.4923
																9.672	156.112	55.6017
																9.765	150.92	53.9622
																9.858	144.2	51.206
																9.951	137.981	50.2402
																10.044	134.602	49.6624
																10.137	136.945	46.561
																10.23	132.37	44.6262
																10.323	127.03	46.7002
																10.416	119.254	46.729
																10.509	115.04	46.1154
																10.602	115.966	57.0064

## Sheet: Speeds
WT				WT				WT				WT				WT
Walled cells				Walled cells				Walled cells				Walled cells				Walled cells
ΔP=-1.2 M				ΔP=-1.2 M				ΔP=-1.2 M				ΔP=-1.2 M				Steady state in 1.2 M sorbitol
0 min				2 min				4 min				6 min
Speed (um/s)				Speed (um/s)				Speed (um/s)				Speed (um/s)				Speed (um/s)
time	mean	stdev		time	mean	stdev		time	mean	stdev		time	mean	stdev		time	mean	stdev
-5.022	0.170362	0.135371		-5.58	0.05212	0.018017		-5.58	0.05431	0.0633978		-6.045	0.0501206	0.0224984		-7.44	0.07744	0.0485278
-4.929	0.089775	0.09066		-5.487	0.052894	0.016675		-5.487	0.0547847	0.0621099		-5.952	0.0495939	0.0206739		-7.347	0.0998129	0.0731976
-4.836	0.086257	0.0839945		-5.394	0.053668	0.0179524		-5.394	0.0545031	0.062093		-5.859	0.0490389	0.020177		-7.254	0.0979971	0.0722602
-4.743	0.085047	0.0727135		-5.301	0.054442	0.0213847		-5.301	0.056754	0.0606213		-5.766	0.0484839	0.0204247		-7.161	0.0961814	0.0715542
-4.65	0.0739454	0.0627544		-5.208	0.107097	0.118437		-5.208	0.0583996	0.0595143		-5.673	0.0451354	0.0226424		-7.068	0.0933814	0.0714464
-4.557	0.0706875	0.0574937		-5.115	0.104837	0.100107		-5.115	0.0656341	0.064735		-5.58	0.0475983	0.0262939		-6.975	0.0836156	0.0649663
-4.464	0.0833019	0.0852799		-5.022	0.100727	0.0903962		-5.022	0.0641784	0.0629714		-5.487	0.046705	0.0262045		-6.882	0.0806567	0.0650654
-4.371	0.0795167	0.0763353		-4.929	0.0966171	0.0814702		-4.929	0.0639397	0.0623688		-5.394	0.0438797	0.0268542		-6.789	0.078148	0.0619966
-4.278	0.0794612	0.0744021		-4.836	0.0925071	0.0736145		-4.836	0.0630983	0.0607653		-5.301	0.0443328	0.0259015		-6.696	0.075231	0.0624141
-4.185	0.0710406	0.0663262		-4.743	0.0702027	0.056527		-4.743	0.0642876	0.0588378		-5.208	0.0440595	0.0264768		-6.603	0.072516	0.0630274
-4.092	0.066282	0.0606561		-4.65	0.0583383	0.03646		-4.65	0.0607778	0.0509828		-5.115	0.0443995	0.0276135		-6.51	0.0669222	0.0495072
-3.999	0.062014	0.0569049		-4.557	0.0540647	0.0304717		-4.557	0.0577474	0.0450648		-5.022	0.0434581	0.0247805		-6.417	0.0616995	0.0464277
-3.906	0.0607008	0.0558032		-4.464	0.0542283	0.0268058		-4.464	0.0589054	0.0414219		-4.929	0.0420225	0.0226363		-6.324	0.0574561	0.0416788
-3.813	0.059685	0.0564659		-4.371	0.0527852	0.0292064		-4.371	0.0527809	0.0361923		-4.836	0.0396765	0.0209415		-6.231	0.0567952	0.0384496
-3.72	0.0591011	0.0583417		-4.278	0.0498509	0.0264622		-4.278	0.0486069	0.031394		-4.743	0.0423752	0.0274128		-6.138	0.0545009	0.0339546
-3.627	0.0581326	0.0614736		-4.185	0.0499544	0.0261358		-4.185	0.0455301	0.0275855		-4.65	0.042968	0.0256657		-6.045	0.0531699	0.0289511
-3.534	0.0560402	0.0591204		-4.092	0.0488954	0.0252241		-4.092	0.0441761	0.0257819		-4.557	0.0427528	0.0249364		-5.952	0.0540964	0.0338403
-3.441	0.0539453	0.0568568		-3.999	0.0471342	0.0238423		-3.999	0.042585	0.0237332		-4.464	0.0411033	0.0238951		-5.859	0.0509261	0.0302764
-3.348	0.0527219	0.0566131		-3.906	0.0473537	0.03369		-3.906	0.041493	0.0223871		-4.371	0.0395479	0.0228404		-5.766	0.0492798	0.0273485
-3.255	0.0518136	0.0573401		-3.813	0.0449816	0.0310256		-3.813	0.0403902	0.0222974		-4.278	0.0373737	0.0220298		-5.673	0.0461589	0.0250984
-3.162	0.0502748	0.0580584		-3.72	0.0455296	0.0362674		-3.72	0.0423905	0.0269279		-4.185	0.037168	0.0233481		-5.58	0.046059	0.0264202
-3.069	0.0487132	0.0596784		-3.627	0.0468191	0.0403847		-3.627	0.0431234	0.0274401		-4.092	0.0372319	0.0243132		-5.487	0.044492	0.0250632
-2.976	0.0482352	0.0563426		-3.534	0.0454362	0.0372539		-3.534	0.0426957	0.0270622		-3.999	0.0372681	0.0243771		-5.394	0.0449811	0.0251228
-2.883	0.0479606	0.0548927		-3.441	0.0433618	0.0353759		-3.441	0.0421329	0.0270917		-3.906	0.0368701	0.0257955		-5.301	0.0445222	0.0269832
-2.79	0.0460739	0.0501977		-3.348	0.041722	0.0345313		-3.348	0.0413642	0.027146		-3.813	0.0358974	0.0267424		-5.208	0.0431345	0.0269122
-2.697	0.0435985	0.0454215		-3.255	0.0406364	0.0339797		-3.255	0.0408775	0.027662		-3.72	0.0361605	0.0269932		-5.115	0.0432794	0.0280788
-2.604	0.0418565	0.0408698		-3.162	0.0430258	0.0412189		-3.162	0.0404819	0.0280535		-3.627	0.0360785	0.0282113		-5.022	0.0435074	0.0295948
-2.511	0.0415676	0.0364155		-3.069	0.0424561	0.0419328		-3.069	0.0395879	0.0287032		-3.534	0.0362617	0.0303192		-4.929	0.041733	0.0288254
-2.418	0.0416699	0.0327223		-2.976	0.0423817	0.0437795		-2.976	0.0387594	0.0296069		-3.441	0.0366908	0.0331579		-4.836	0.040397	0.0265349
-2.325	0.0419702	0.0302896		-2.883	0.0422474	0.0453791		-2.883	0.037612	0.0280926		-3.348	0.0372601	0.0365511		-4.743	0.0392007	0.0246601
-2.232	0.0428892	0.0294303		-2.79	0.0413511	0.0447584		-2.79	0.0370159	0.0274652		-3.255	0.0373099	0.0368331		-4.65	0.0384302	0.0238482
-2.139	0.0442958	0.0304076		-2.697	0.0406832	0.0422043		-2.697	0.0367847	0.0260143		-3.162	0.0377754	0.0374289		-4.557	0.0378956	0.0226342
-2.046	0.0468543	0.0324668		-2.604	0.0403372	0.0402791		-2.604	0.0361731	0.0249761		-3.069	0.0382862	0.0389259		-4.464	0.0363321	0.0210166
-1.953	0.0498068	0.0355972		-2.511	0.0403299	0.038805		-2.511	0.0357955	0.0242979		-2.976	0.0389108	0.0409032		-4.371	0.0359883	0.0209379
-1.86	0.0535722	0.0393333		-2.418	0.0403559	0.0381249		-2.418	0.0356166	0.023764		-2.883	0.0397796	0.0433323		-4.278	0.0350955	0.020044
-1.767	0.0577685	0.0435171		-2.325	0.040652	0.0384403		-2.325	0.0357973	0.0235866		-2.79	0.0401403	0.0430495		-4.185	0.0347745	0.0200095
-1.674	0.0616945	0.0474642		-2.232	0.0411894	0.0370184		-2.232	0.0369903	0.0234148		-2.697	0.0417926	0.0417179		-4.092	0.034106	0.0196178
-1.581	0.0651323	0.0484047		-2.139	0.0429057	0.0363945		-2.139	0.0386009	0.0237657		-2.604	0.0427178	0.0388529		-3.999	0.0334058	0.0197046
-1.488	0.0684581	0.0474317		-2.046	0.0442725	0.0365365		-2.046	0.0404824	0.0248398		-2.511	0.043641	0.0364271		-3.906	0.0328248	0.0199042
-1.395	0.0716944	0.0474536		-1.953	0.0468029	0.0361811		-1.953	0.0425282	0.0265429		-2.418	0.04471	0.0348982		-3.813	0.0320508	0.0201977
-1.302	0.0744958	0.0477359		-1.86	0.0495908	0.0368902		-1.86	0.0447516	0.0284436		-2.325	0.0460276	0.034496		-3.72	0.0313651	0.0207335
-1.209	0.0764855	0.0469871		-1.767	0.052915	0.0356851		-1.767	0.0475086	0.029182		-2.232	0.0477968	0.0346416		-3.627	0.0308579	0.0195612
-1.116	0.0785934	0.0442448		-1.674	0.0563454	0.035444		-1.674	0.0503293	0.0301298		-2.139	0.0497885	0.0352092		-3.534	0.030561	0.0187347
-1.023	0.0803936	0.0420674		-1.581	0.0598581	0.0360244		-1.581	0.0537552	0.0318424		-2.046	0.0518612	0.0366387		-3.441	0.0301301	0.0182126
-0.93	0.0817146	0.0407039		-1.488	0.0633069	0.037041		-1.488	0.0569973	0.0331345		-1.953	0.0536989	0.0382161		-3.348	0.0298308	0.0180284
-0.837	0.0829881	0.0405713		-1.395	0.066699	0.0389918		-1.395	0.060252	0.0341899		-1.86	0.0563029	0.0404419		-3.255	0.0295185	0.0183139
-0.744	0.0841134	0.0417362		-1.302	0.0694399	0.040359		-1.302	0.0626955	0.0350961		-1.767	0.0588079	0.0412123		-3.162	0.0295032	0.0188221
-0.651	0.085025	0.0417643		-1.209	0.0722448	0.0410207		-1.209	0.065115	0.036625		-1.674	0.0611524	0.0400672		-3.069	0.0295112	0.0197606
-0.558	0.085839	0.0424282		-1.116	0.0751293	0.0425282		-1.116	0.0675434	0.0385745		-1.581	0.0635075	0.0397365		-2.976	0.0296671	0.0210722
-0.465	0.0867866	0.0442398		-1.023	0.0775258	0.0442593		-1.023	0.0701196	0.0409631		-1.488	0.0653765	0.0393718		-2.883	0.0299817	0.0227182
-0.372	0.0880327	0.046899		-0.93	0.0796031	0.0464348		-0.93	0.0726034	0.0438693		-1.395	0.0673384	0.0399819		-2.79	0.0307459	0.0242987
-0.279	0.0899859	0.0502428		-0.837	0.0811293	0.047348		-0.837	0.074406	0.0446556		-1.302	0.0688505	0.0402385		-2.697	0.0316708	0.0244741
-0.186	0.0908929	0.0497967		-0.744	0.0826649	0.0492178		-0.744	0.0758568	0.0454584		-1.209	0.0703422	0.0408498		-2.604	0.0326413	0.0243023
-0.093	0.0920613	0.0505865		-0.651	0.0839711	0.0511738		-0.651	0.0768268	0.0457911		-1.116	0.0717971	0.0425795		-2.511	0.0338633	0.0245138
0	0.0935572	0.0521565		-0.558	0.0850668	0.0530947		-0.558	0.0773396	0.045564		-1.023	0.0735093	0.0451699		-2.418	0.0355613	0.0251024
0.093	0.0946896	0.0543041		-0.465	0.0862702	0.055729		-0.465	0.0776669	0.0453872		-0.93	0.0746427	0.046554		-2.325	0.037467	0.0259109
0.186	0.0961497	0.0575497		-0.372	0.0867579	0.0563406		-0.372	0.0780995	0.0448775		-0.837	0.0755485	0.0446037		-2.232	0.0395057	0.0267842
0.279	0.0964568	0.0581368		-0.279	0.0877089	0.057275		-0.279	0.0786638	0.0450414		-0.744	0.0765191	0.0434782		-2.139	0.0418175	0.0280919
0.372	0.0975041	0.0593201		-0.186	0.0884681	0.0579569		-0.186	0.0789502	0.044981		-0.651	0.0776791	0.0429872		-2.046	0.0442662	0.0296388
0.465	0.0980051	0.0603239		-0.093	0.0893398	0.0577411		-0.093	0.0792011	0.0447542		-0.558	0.0792041	0.0439099		-1.953	0.0468968	0.0313287
0.558	0.0983846	0.0599425		0	0.0902402	0.0583871		0	0.0797455	0.04542		-0.465	0.0808257	0.0463036		-1.86	0.0496479	0.0334749
0.651	0.0980931	0.0591011		0.093	0.0912731	0.0592932		0.093	0.0807997	0.0461047		-0.372	0.082165	0.0487108		-1.767	0.0521726	0.0340155
0.744	0.0974184	0.0576154		0.186	0.0921848	0.0607575		0.186	0.0822031	0.0479041		-0.279	0.0835957	0.0499133		-1.674	0.0544678	0.0350694
0.837	0.096277	0.0567202		0.279	0.0930181	0.0611983		0.279	0.083714	0.0505501		-0.186	0.0851244	0.0520497		-1.581	0.0570865	0.0364582
0.93	0.0948983	0.0563775		0.372	0.0940484	0.0617458		0.372	0.0851551	0.052632		-0.093	0.0866337	0.0548929		-1.488	0.0593979	0.0374608
1.023	0.0941516	0.0575423		0.465	0.095256	0.063478		0.465	0.0866797	0.055417		0	0.0886674	0.057876		-1.395	0.0615184	0.0387187
1.116	0.0932539	0.05845		0.558	0.0957443	0.0635967		0.558	0.0874595	0.0561167		0.093	0.090172	0.0594306		-1.302	0.0634539	0.0398419
1.209	0.0931921	0.05941		0.651	0.0969816	0.0642662		0.651	0.0886617	0.0577822		0.186	0.0928689	0.0611368		-1.209	0.0652613	0.0411226
1.302	0.0931146	0.0587183		0.744	0.098212	0.0657859		0.744	0.0900805	0.0599409		0.279	0.0949302	0.061824		-1.116	0.0668645	0.0420731
1.395	0.0933354	0.0598229		0.837	0.099107	0.0661748		0.837	0.0915694	0.0612215		0.372	0.0964973	0.0615557		-1.023	0.0680633	0.0418673
1.488	0.0935126	0.0591473		0.93	0.0999772	0.0677534		0.93	0.0928362	0.0619977		0.465	0.0977567	0.0623856		-0.93	0.0694912	0.0421164
1.581	0.0940128	0.0603831		1.023	0.100903	0.0684449		1.023	0.0935108	0.0609674		0.558	0.0992594	0.063979		-0.837	0.0708586	0.0422069
1.674	0.0957367	0.0616558		1.116	0.101744	0.070152		1.116	0.0940991	0.0605585		0.651	0.100869	0.0651597		-0.744	0.0722567	0.0429132
1.767	0.0982299	0.0642565		1.209	0.102693	0.0715844		1.209	0.0949032	0.0611725		0.744	0.102595	0.0673118		-0.651	0.0734708	0.0439602
1.86	0.10025	0.0665309		1.302	0.103226	0.072311		1.302	0.095957	0.0619388		0.837	0.104147	0.0699321		-0.558	0.0746321	0.0449392
1.953	0.101445	0.0682241		1.395	0.103479	0.0729527		1.395	0.0967233	0.0613399		0.93	0.10546	0.0714103		-0.465	0.0759357	0.0465599
2.046	0.10275	0.0713906		1.488	0.103303	0.0713072		1.488	0.0975376	0.060943		1.023	0.10655	0.0712159		-0.372	0.0771483	0.0477521
2.139	0.103552	0.0704422		1.581	0.103069	0.0699568		1.581	0.0982114	0.0616283		1.116	0.106926	0.069482		-0.279	0.078343	0.0492039
2.232	0.104241	0.0699465		1.674	0.103063	0.0687355		1.674	0.0986737	0.0632494		1.209	0.10793	0.0688785		-0.186	0.0795818	0.0507067
2.325	0.104901	0.071042		1.767	0.103123	0.0673022		1.767	0.0987845	0.0646335		1.302	0.109118	0.0691095		-0.093	0.0809138	0.0525489
2.418	0.105554	0.0719389		1.86	0.103299	0.0667032		1.86	0.0986779	0.0657525		1.395	0.110279	0.071054		0	0.0817434	0.0528812
2.511	0.106497	0.0740731		1.953	0.103644	0.0652836		1.953	0.0986068	0.0658666		1.488	0.11113	0.0733022		0.093	0.0828512	0.052108
2.604	0.104336	0.0710055		2.046	0.103744	0.064975		2.046	0.0985678	0.0661516		1.581	0.111667	0.0750576		0.186	0.0836146	0.05197
2.697	0.103734	0.072055		2.139	0.10404	0.0649832		2.139	0.0982308	0.0650412		1.674	0.11177	0.0769627		0.279	0.0841808	0.0512616
2.79	0.10379	0.0738184		2.232	0.10502	0.0653415		2.232	0.0977851	0.0639204		1.767	0.112046	0.0794016		0.372	0.0844752	0.0499038
2.883	0.104164	0.0747146		2.325	0.105958	0.0661479		2.325	0.0975894	0.0629208		1.86	0.110534	0.0769244		0.465	0.0847636	0.048949
2.976	0.104585	0.0767888		2.418	0.10734	0.0658694		2.418	0.0977899	0.0617471		1.953	0.110132	0.0739335		0.558	0.0846289	0.0481948
3.069	0.104282	0.0761888		2.511	0.107321	0.0637501		2.511	0.0982366	0.0614678		2.046	0.10988	0.0709483		0.651	0.084767	0.0480416
3.162	0.104582	0.0755994		2.604	0.108111	0.063717		2.604	0.0988138	0.0618669		2.139	0.109182	0.0679169		0.744	0.0850814	0.0485836
3.255	0.104455	0.0759288		2.697	0.109821	0.0639822		2.697	0.0995944	0.0629171		2.232	0.108811	0.0659444		0.837	0.0853238	0.0496588
3.348	0.104232	0.0747975		2.79	0.11114	0.0651561		2.79	0.100177	0.0644501		2.325	0.108373	0.0653416		0.93	0.0858068	0.0514245
3.441	0.102327	0.0724267		2.883	0.112938	0.065541		2.883	0.101756	0.06516		2.418	0.109077	0.0647777		1.023	0.085998	0.0512382
3.534	0.101378	0.0684325		2.976	0.114646	0.0670321		2.976	0.103226	0.0657704		2.511	0.109932	0.0645759		1.116	0.0863144	0.0516258
3.627	0.101097	0.0649408		3.069	0.116522	0.0686136		3.069	0.105014	0.0671298		2.604	0.110934	0.0662256		1.209	0.0867257	0.0523581
3.72	0.100862	0.062634		3.162	0.117889	0.0694116		3.162	0.106826	0.0685232		2.697	0.111593	0.067461		1.302	0.0872563	0.0521332
3.813	0.101158	0.0613722		3.255	0.119183	0.0707486		3.255	0.10895	0.0701737		2.79	0.112567	0.0698711		1.395	0.0873925	0.0520025
3.906	0.101438	0.0617114		3.348	0.121508	0.0696034		3.348	0.109652	0.0669573		2.883	0.112805	0.0707478		1.488	0.0880652	0.0518016
3.999	0.103082	0.0619513		3.441	0.122584	0.0697844		3.441	0.111482	0.065876		2.976	0.113908	0.072078		1.581	0.0885587	0.051835
4.092	0.104732	0.0611959		3.534	0.123941	0.0700111		3.534	0.113079	0.0652488		3.069	0.11549	0.0743307		1.674	0.0887829	0.0519694
4.185	0.106181	0.0622975		3.627	0.124594	0.0706932		3.627	0.114883	0.0658385		3.162	0.116636	0.0761276		1.767	0.08907	0.0525513
4.278	0.108584	0.0643789		3.72	0.125256	0.0726528		3.72	0.117059	0.0671324		3.255	0.117973	0.0792003		1.86	0.0892167	0.0536628
4.371	0.109886	0.0677024		3.813	0.124285	0.0728316		3.813	0.119092	0.0666498		3.348	0.117573	0.0775692		1.953	0.0895104	0.0528891
4.464	0.112598	0.0699727		3.906	0.123547	0.0728017		3.906	0.121215	0.0672558		3.441	0.117386	0.0754551		2.046	0.089771	0.0529403
4.557	0.115437	0.0725974		3.999	0.12302	0.073269		3.999	0.123241	0.067565		3.534	0.117113	0.074245		2.139	0.0902234	0.053269
4.65	0.118178	0.0756834		4.092	0.121919	0.0746808		4.092	0.125713	0.0684285		3.627	0.116678	0.0722779		2.232	0.0908594	0.0538893
4.743	0.120214	0.0749618		4.185	0.121043	0.0753583		4.185	0.128802	0.0697429		3.72	0.115545	0.0706109		2.325	0.0917516	0.0550517
4.836	0.122583	0.0767032		4.278	0.120631	0.0738055		4.278	0.131637	0.0701875		3.813	0.115548	0.0702248		2.418	0.0925032	0.0549153
4.929	0.123787	0.0773843		4.371	0.119783	0.0723141		4.371	0.134069	0.0699628		3.906	0.115739	0.0699627		2.511	0.093378	0.0553257
5.022	0.125198	0.076002		4.464	0.120079	0.0715413		4.464	0.136741	0.0713967		3.999	0.115951	0.0695254		2.604	0.0943149	0.056105
5.115	0.126493	0.0758833		4.557	0.121113	0.0715372		4.557	0.138917	0.0737303		4.092	0.115648	0.0706563		2.697	0.095277	0.0567972
5.208	0.127586	0.0766876		4.65	0.121974	0.0727945		4.65	0.140897	0.0770265		4.185	0.115831	0.0735135		2.79	0.0960472	0.0582544
5.301	0.12935	0.0784622		4.743	0.124466	0.0742031		4.743	0.14199	0.0778115		4.278	0.116819	0.0743787		2.883	0.0967135	0.0575274
5.394	0.130826	0.0752109		4.836	0.126688	0.0766146		4.836	0.14336	0.0809302		4.371	0.118087	0.0754421		2.976	0.0977974	0.0571409
5.487	0.13129	0.0721741		4.929	0.128345	0.0778969		4.929	0.143339	0.0811223		4.464	0.119452	0.0773901		3.069	0.0989485	0.0573555
5.58	0.131602	0.0702044		5.022	0.13193	0.0792731		5.022	0.143626	0.0819802		4.557	0.121984	0.0790218		3.162	0.0996741	0.0568633
5.673	0.131945	0.0697631		5.115	0.130892	0.0789387		5.115	0.143895	0.0820129		4.65	0.124818	0.0820855		3.255	0.0999101	0.0562162
5.766	0.132391	0.0690317		5.208	0.134231	0.0765577		5.208	0.14268	0.0805563		4.743	0.125102	0.0813997		3.348	0.100513	0.0553698
5.859	0.131257	0.0666328		5.301	0.135848	0.0756343		5.301	0.142129	0.0789368		4.836	0.126339	0.0821456		3.441	0.101004	0.0550943
5.952	0.132876	0.0660525		5.394	0.137126	0.0748467		5.394	0.14179	0.0779796		4.929	0.127145	0.0819896		3.534	0.101537	0.0551743
6.045	0.135094	0.0672197		5.487	0.137726	0.0755723		5.487	0.142312	0.0782911		5.022	0.128563	0.0828013		3.627	0.102007	0.0557851
6.138	0.137716	0.0703557		5.58	0.138847	0.0752957		5.58	0.142833	0.0798613		5.115	0.12997	0.0852052		3.72	0.102413	0.0571036
6.231	0.13925	0.0746255		5.673	0.139999	0.0744886		5.673	0.141784	0.0778411		5.208	0.132768	0.0844071		3.813	0.102943	0.0570126
6.324	0.142916	0.07695		5.766	0.139727	0.0733477		5.766	0.14204	0.0780068		5.301	0.133512	0.0832512		3.906	0.103485	0.0572042
6.417	0.145433	0.0786164		5.859	0.140104	0.0735433		5.859	0.142203	0.0779061		5.394	0.135289	0.0829247		3.999	0.103893	0.0573034
6.51	0.146931	0.0802329		5.952	0.13913	0.0731326		5.952	0.142582	0.0795836		5.487	0.13482	0.0819882		4.092	0.104564	0.0577742
6.603	0.148068	0.0822806		6.045	0.140692	0.0763709		6.045	0.14305	0.0821158		5.58	0.135174	0.0819127		4.185	0.105373	0.0586122
6.696	0.15101	0.0862248		6.138	0.135947	0.0752227		6.138	0.143044	0.0811384		5.673	0.136515	0.0819255		4.278	0.106677	0.0589866
6.789	0.147072	0.0836433		6.231	0.135892	0.0767875		6.231	0.144045	0.0825502		5.766	0.13813	0.0825749		4.371	0.107753	0.0603888
6.882	0.14884	0.0829535		6.324	0.136005	0.0797416		6.324	0.146218	0.0842574		5.859	0.13713	0.0788189		4.464	0.108849	0.062095
6.975	0.146697	0.0793994		6.417	0.137795	0.0798712		6.417	0.145682	0.0833512		5.952	0.137946	0.0806408		4.557	0.109911	0.0638813
7.068	0.147076	0.0762706		6.51	0.14002	0.0831026		6.51	0.148425	0.0876958		6.045	0.139241	0.0840361		4.65	0.111184	0.066423
7.161	0.143709	0.0750847		6.603	0.143646	0.0832197		6.603	0.153979	0.0902083		6.138	0.139983	0.0844695		4.743	0.11206	0.0668548
7.254	0.149407	0.0745431		6.696	0.145158	0.0854664		6.696	0.156832	0.0924009		6.231	0.141979	0.0857863		4.836	0.113525	0.0676787
7.347	0.154164	0.0734017		6.789	0.144461	0.0795949		6.789	0.158209	0.0920456		6.324	0.14206	0.0860942		4.929	0.114944	0.0686375
7.44	0.155889	0.0756669		6.882	0.146683	0.0825714		6.882	0.157148	0.091679		6.417	0.145732	0.0830552		5.022	0.116071	0.0691474
7.533	0.149493	0.0676864		6.975	0.149511	0.0867397		6.975	0.1597	0.0928033		6.51	0.1466	0.0864946		5.115	0.116867	0.0696022
7.626	0.151381	0.0718692		7.068	0.149004	0.0773514		7.068	0.1522	0.0858479		6.603	0.142608	0.0799739		5.208	0.117435	0.0696968
7.719	0.141067	0.0705204		7.161	0.151119	0.0804564		7.161	0.153813	0.0863992		6.696	0.144135	0.0800793		5.301	0.118458	0.0698836
7.812	0.142979	0.0761686		7.254	0.152271	0.0828513		7.254	0.152	0.0810339		6.789	0.145159	0.0809869		5.394	0.118837	0.0703909
7.905	0.145931	0.082547		7.347	0.157989	0.0902963		7.347	0.150216	0.082298		6.882	0.141664	0.0729944		5.487	0.119849	0.0717837
7.998	0.146574	0.0889037		7.44	0.163658	0.0943053		7.44	0.144816	0.0673321		6.975	0.145098	0.0750257		5.58	0.120608	0.0729377
8.091	0.149673	0.098687		7.533	0.148345	0.0685889		7.533	0.152348	0.0711442		7.068	0.147753	0.0795564		5.673	0.121129	0.0726491
8.184	0.161626	0.075867		7.626	0.16057	0.0730117		7.626	0.155348	0.0724822		7.161	0.152341	0.0829063		5.766	0.121992	0.0716484
8.277	0.163287	0.0733671		7.719	0.159501	0.080576		7.719	0.154835	0.0776236		7.254	0.151406	0.0867918		5.859	0.122985	0.0711266
8.37	0.164949	0.0728079		7.812	0.164722	0.0918893		7.812	0.16164	0.0829398		7.347	0.150154	0.0895284		5.952	0.123223	0.07061
8.463	0.174397	0.0706724		7.905	0.16427	0.100731		7.905	0.163465	0.0900219		7.44	0.160577	0.0916564		6.045	0.124467	0.0714942
8.556	0.175726	0.0761097		7.998	0.168454	0.100988		7.998	0.164711	0.0836824		7.533	0.166539	0.0804994		6.138	0.125766	0.0717362
8.649	0.153267	0.0562706		8.091	0.171266	0.113405		8.091	0.163277	0.0947235		7.626	0.170083	0.084446		6.231	0.126937	0.0725005
8.742	0.151905	0.0534562		8.184	0.174079	0.126403		8.184	0.161227	0.101798		7.719	0.173308	0.0890389		6.324	0.127768	0.0737554
8.835	0.146153	0.0532776						8.277	0.166272	0.111203		7.812	0.166712	0.0833508		6.417	0.128199	0.0738518
8.928	0.14246	0.055541						8.37	0.160366	0.12031		7.905	0.165842	0.0897806		6.51	0.12906	0.0759654
9.021	0.140685	0.0562992						8.463	0.142534	0.0959867		7.998	0.167583	0.0945409		6.603	0.130405	0.0770728
								8.556	0.139808	0.0833328		8.091	0.156689	0.0850694		6.696	0.131121	0.0758395
								8.649	0.134946	0.063915		8.184	0.163074	0.088656		6.789	0.130354	0.0728632
								8.742	0.134238	0.0399293		8.277	0.164384	0.0803103		6.882	0.131331	0.0721012
								8.835	0.138084	0.0455779		8.37	0.164679	0.0842916		6.975	0.132129	0.072058
								8.928	0.142824	0.0363778		8.463	0.132757	0.0804637		7.068	0.131644	0.0682441
								9.021	0.147696	0.0393947		8.556	0.131221	0.0842493		7.161	0.132094	0.0674087
								9.114	0.152568	0.04376		8.649	0.131993	0.0898974		7.254	0.13268	0.0679254
												8.742	0.132765	0.0970904		7.347	0.133581	0.0694003
												8.835	0.133537	0.105513		7.44	0.134579	0.0720099
																7.533	0.132832	0.0688561
																7.626	0.134218	0.0693847
																7.719	0.135283	0.0706646
																7.812	0.136318	0.0715724
																7.905	0.137509	0.0731605
																7.998	0.137521	0.0705617
																8.091	0.138464	0.0693513
																8.184	0.138663	0.0711971
																8.277	0.14062	0.0735866
																8.37	0.142126	0.0775187
																8.463	0.141818	0.0752104
																8.556	0.142331	0.0774909
																8.649	0.143067	0.0747125
																8.742	0.142747	0.0725086
																8.835	0.144318	0.072822
																8.928	0.144207	0.071434
																9.021	0.143034	0.0694563
																9.114	0.145397	0.0715916
																9.207	0.14865	0.0745973
																9.3	0.149851	0.0805152
																9.393	0.151369	0.0794154
																9.486	0.150741	0.0777223
																9.579	0.150906	0.0792417
																9.672	0.143166	0.0756557
																9.765	0.144219	0.079554
																9.858	0.148301	0.083209
																9.951	0.147484	0.0875756
																10.044	0.138042	0.078007
																10.137	0.13568	0.0814271
																10.23	0.135456	0.0874849
																10.323	0.151034	0.0982541
																10.416	0.158127	0.104614
																10.509	0.164129	0.107347
																10.602	0.146856	0.0704188
																10.695	0.139533	0.0785172
																10.788	0.139104	0.0793965
																10.881	0.138675	0.0825707
																10.974	0.138246	0.0877911
																11.067	0.137818	0.09472
																11.16	0.141323	0.108837

## Sheet: ANOVA (#)
One -way ANOVA at time 0s
Significance level	α =	0.05
	mean	stdev	N
0 min	835.66	206.508	103
2 min	822.49	219.056	169
4 min	831.118	211.506	190
6 min	842.85	241.637	153
Steady-state	832.781	211.52	354
Overall mean	m=	832.556
Between-group degrees of freedom	dfb=	4
Between-group mean square value	MSb=	8684.88
Within-group degrees of freedom	dfw=	964
Within-group mean square value	MSw=	47235.4
F-ratio	F=	0.183864
Critical value	Fcrit=	2.38116
p-value	p=	0.946824
There is no statistically significant difference between all conditions
