# Supplementary material for: Rapid adaptation of endocytosis, exocytosis, and eisosomes after an acute increase in membrane tension in yeast cells
Source: eLife. 2021 May 13;10:e62084. doi: 10.7554/eLife.62084 (PMC9045820; doi:10.7554/eLife.62084)
Supplement: Figure 6—source data 5. [file elife-62084-fig6-data5.xlsx]

## Sheet: Number of molecules
pil1Δ				pil1Δ				pil1Δ				pil1Δ
Walled cells				Walled cells				Walled cells				Walled cells
ΔP=-1.2 M				ΔP=-1.2 M				ΔP=-1.2 M				Steady state in 1.2 M sorbitol
0 min				2 min				4 min
Number of molecules (#)				Number of molecules (#)				Number of molecules (#)				Number of molecules (#)
time	mean	stdev		time	mean	stdev		time	mean	stdev		time	mean	stdev
-6.045	172.913	110.045		-5.859	180.085	151.037		-5.58	205.072	121.804		-8.463	141.29	54.3004
-5.952	180.314	110.592		-5.766	188.595	149.198		-5.487	207.421	120.95		-8.37	146.376	53.9995
-5.859	188.867	104.285		-5.673	194.119	140.474		-5.394	210.689	118.965		-8.277	151.798	53.5764
-5.766	191.398	102.018		-5.58	192.048	129.166		-5.301	208.168	116.574		-8.184	158.183	53.8856
-5.673	189.5	99.6424		-5.487	196.12	116.27		-5.208	206.702	113.44		-8.091	157.756	52.2741
-5.58	198.422	97.6602		-5.394	204.103	114.294		-5.115	207.033	110.271		-7.998	160.07	53.0296
-5.487	208.353	100.846		-5.301	217.088	114.794		-5.022	215.456	111.258		-7.905	166.925	53.5923
-5.394	217.538	103.456		-5.208	221.238	112.601		-4.929	223.246	111.725		-7.812	169.963	53.4432
-5.301	226.654	105.336		-5.115	222.058	109.001		-4.836	229.44	110.771		-7.719	174.988	53.9716
-5.208	237.786	105.894		-5.022	234.253	108.007		-4.743	234.66	109.552		-7.626	179.455	55.0551
-5.115	237.552	103.501		-4.929	246.916	109.428		-4.65	236.565	107.11		-7.533	181.337	55.6318
-5.022	237.138	108.104		-4.836	257.976	110.587		-4.557	245.321	108.458		-7.44	188.179	57.4389
-4.929	245.77	110.084		-4.743	267.254	111.316		-4.464	254.528	109.296		-7.347	193.053	58.5379
-4.836	249.697	110.941		-4.65	285.654	118.49		-4.371	265.002	110.305		-7.254	197.446	60.0908
-4.743	261.253	110.443		-4.557	296.52	117.448		-4.278	277.114	115.623		-7.161	202.396	61.2609
-4.65	266.563	111.813		-4.464	296.206	121.701		-4.185	281.877	117.84		-7.068	206.357	64.804
-4.557	279.1	112.342		-4.371	308.14	123.374		-4.092	291.194	119.903		-6.975	213.546	66.2992
-4.464	288.718	112.397		-4.278	322.567	125.138		-3.999	302.959	121.711		-6.882	218.685	68.4935
-4.371	298.5	112.828		-4.185	335.818	125.621		-3.906	312.89	122.61		-6.789	224.952	70.2256
-4.278	312.35	113.258		-4.092	347.377	126.617		-3.813	326.042	123.876		-6.696	229.243	71.8147
-4.185	314.831	117.184		-3.999	360.873	127.343		-3.72	335.372	125.187		-6.603	232.146	73.9013
-4.092	329.441	118.297		-3.906	366.634	130.969		-3.627	346.938	127.012		-6.51	238.176	76.0659
-3.999	343.023	119.109		-3.813	380.188	132.218		-3.534	360.882	128.462		-6.417	243.027	78.3317
-3.906	357.378	120.225		-3.72	398.117	132.997		-3.441	374.008	129.278		-6.324	248.782	79.9647
-3.813	372.14	121.037		-3.627	411.555	132.964		-3.348	388.808	129.466		-6.231	255.083	81.2635
-3.72	385.61	123.826		-3.534	428.066	134.218		-3.255	401.859	130.318		-6.138	260.53	82.659
-3.627	399.311	130.847		-3.441	443.425	136.484		-3.162	414.418	132.31		-6.045	268.281	84.1311
-3.534	415.786	132.966		-3.348	460.376	138.22		-3.069	428.682	133.462		-5.952	274.921	85.8659
-3.441	431.414	134.918		-3.255	477.717	139.779		-2.976	443.66	134.979		-5.859	281.569	87.6632
-3.348	447.47	137.176		-3.162	494.894	142.145		-2.883	458.296	136.171		-5.766	289.574	89.3135
-3.255	463.904	139.497		-3.069	512.354	145.169		-2.79	473.271	137.64		-5.673	297.442	94.6802
-3.162	478.889	150.193		-2.976	525.822	151.213		-2.697	487.969	139.549		-5.58	305.076	97.2143
-3.069	496.209	152.422		-2.883	543.646	154.514		-2.604	503.216	141.385		-5.487	313.284	98.5498
-2.976	514.493	154.55		-2.79	561.875	157.929		-2.511	518.315	143.486		-5.394	321.936	99.9825
-2.883	531.051	157.275		-2.697	580.842	160.416		-2.418	533.82	145.366		-5.301	331.192	101.159
-2.79	548.609	159.895		-2.604	598.89	163.602		-2.325	548.971	147.462		-5.208	339.745	103.876
-2.697	561.668	166.931		-2.511	617.035	166.571		-2.232	564.253	151.872		-5.115	348.043	105.903
-2.604	579.647	169.032		-2.418	635.315	169.713		-2.139	580.275	153.884		-5.022	356.608	107.492
-2.511	597.539	170.577		-2.325	654.36	171.857		-2.046	596.02	156.189		-4.929	365.65	108.722
-2.418	616.09	172.691		-2.232	672.731	174.609		-1.953	612.283	158.781		-4.836	374.332	110.206
-2.325	634.57	174.747		-2.139	690.856	177.358		-1.86	628.522	161.425		-4.743	383.156	112.172
-2.232	654.158	177.47		-2.046	705.767	180.187		-1.767	645.531	164.663		-4.65	390.528	114.509
-2.139	672.697	179.593		-1.953	723.536	182.243		-1.674	661.936	167.048		-4.557	399.133	115.786
-2.046	692.196	181.678		-1.86	740.966	184.486		-1.581	678.393	169.3		-4.464	408.368	117.216
-1.953	711.063	184.161		-1.767	758.474	185.688		-1.488	693.799	171.367		-4.371	417.511	118.768
-1.86	730.053	186.377		-1.674	774.404	187.517		-1.395	709.561	173.595		-4.278	426.255	120.457
-1.767	743.197	194.586		-1.581	789.352	189.995		-1.302	723.801	175.783		-4.185	434.574	124.169
-1.674	760.869	196.619		-1.488	804.194	192.831		-1.209	738.119	178.235		-4.092	443.834	125.736
-1.581	778.234	198.996		-1.395	817.589	194.643		-1.116	752.083	180.657		-3.999	453.179	127.375
-1.488	795.116	201.574		-1.302	830.527	197.056		-1.023	765.522	182.946		-3.906	462.356	129.099
-1.395	811.965	204.693		-1.209	842.863	199.499		-0.93	778.441	185.431		-3.813	471.616	131.077
-1.302	825.029	208.125		-1.116	843.218	217.469		-0.837	784.963	192.65		-3.72	480.985	136.23
-1.209	839.434	210.311		-1.023	853.004	220.599		-0.744	795.369	194.622		-3.627	490.49	138.149
-1.116	852.8	212.192		-0.93	861.725	223.355		-0.651	804.93	196.65		-3.534	499.452	139.95
-1.023	865.346	214.313		-0.837	869.471	225.684		-0.558	813.669	198.459		-3.441	508.63	141.882
-0.93	877.047	216.618		-0.744	875.786	228.043		-0.465	821.592	200.449		-3.348	517.764	144.081
-0.837	878.337	229.023		-0.651	877.823	232.572		-0.372	828.614	203.434		-3.255	526.542	146.416
-0.744	888.847	231.353		-0.558	883.145	234.744		-0.279	835.261	206.524		-3.162	535.719	148.587
-0.651	898.378	233.574		-0.465	887.856	236.864		-0.186	841.16	209.416		-3.069	545.188	150.803
-0.558	907.354	235.893		-0.372	891.461	238.731		-0.093	846.158	212.204		-2.976	554.71	153.208
-0.465	915.709	237.777		-0.279	894.823	240.868		0	850.473	215.075		-2.883	564.227	155.698
-0.372	921.215	238.874		-0.186	896.344	240.325		0.093	843.743	224.923		-2.79	573.833	157.594
-0.279	926.01	240.434		-0.093	897.467	239.816		0.186	844.981	225.486		-2.697	583.107	159.69
-0.186	929.839	240.927		0	898.178	238.977		0.279	845.629	226.088		-2.604	592.443	161.441
-0.093	932.596	241.485		0.093	897.574	238.089		0.372	845.22	225.873		-2.511	601.897	163.608
0	934.497	242.254		0.186	896.492	237.722		0.465	844.411	225.816		-2.418	611.423	165.789
0.093	932.811	245.124		0.279	894.529	237.432		0.558	842.481	226.026		-2.325	620.834	167.654
0.186	932.719	246.403		0.372	892.566	237.4		0.651	840.247	226.388		-2.232	630.219	169.732
0.279	932.09	247.63		0.465	890.049	237.141		0.744	837.897	226.842		-2.139	639.471	171.852
0.372	930.985	248.984		0.558	886.689	236.782		0.837	835.191	227.253		-2.046	648.669	174.078
0.465	929.606	250.555		0.651	883.457	236.603		0.93	832.045	227.868		-1.953	657.878	176.407
0.558	926.737	252.06		0.744	874.633	240.317		1.023	825.109	229.38		-1.86	666.891	178.492
0.651	923.444	253.583		0.837	869.441	239.907		1.116	820.116	228.155		-1.767	675.869	180.524
0.744	919.456	254.941		0.93	863.951	239.567		1.209	814.901	227.102		-1.674	684.645	182.508
0.837	914.905	256.16		1.023	858.208	238.863		1.302	809.404	225.783		-1.581	693.348	184.541
0.93	911.998	256.89		1.116	859.376	234.037		1.395	804.212	224.408		-1.488	701.701	186.705
1.023	906.242	257.255		1.209	852.319	232.451		1.488	797.929	222.913		-1.395	708.861	188.42
1.116	900.015	257.251		1.302	845.177	231.133		1.581	791.549	221.479		-1.302	716.384	190.025
1.209	893.334	257.281		1.395	837.469	229.81		1.674	785.086	220.213		-1.209	723.552	191.716
1.302	886.552	257.532		1.488	829.911	228.703		1.767	778.306	219.37		-1.116	730.235	193.369
1.395	879.594	257.992		1.581	822.108	227.916		1.86	771.634	218.353		-1.023	736.519	195.2
1.488	870.872	255.929		1.674	808.62	231.873		1.953	763.062	217.759		-0.93	741.323	195.864
1.581	861.794	254.11		1.767	800.403	229.862		2.046	755.37	216.519		-0.837	746.138	196.829
1.674	852.489	252.119		1.86	791.228	226.674		2.139	747.55	215.381		-0.744	750.597	197.898
1.767	844.751	251.114		1.953	781.569	223.703		2.232	739.134	213.871		-0.651	754.465	198.891
1.86	840.264	246.8		2.046	780.207	218.488		2.325	732.528	211.673		-0.558	757.848	200.012
1.953	831.084	245.859		2.139	770.388	215.663		2.418	723.78	210.202		-0.465	755.894	206.48
2.046	821.78	244.49		2.232	760.544	213.083		2.511	714.873	208.897		-0.372	758.55	207.125
2.139	812.214	242.983		2.325	750.684	210.146		2.604	705.804	207.582		-0.279	760.576	207.771
2.232	802.397	241.595		2.418	740.431	206.931		2.697	696.484	206.245		-0.186	762.171	208.29
2.325	792.466	240.807		2.511	730.1	203.913		2.79	687.04	205.027		-0.093	763.177	208.938
2.418	781.977	237.868		2.604	719.39	200.611		2.883	677.224	202.68		0	763.484	208.929
2.511	771.288	235.099		2.697	707.212	197.49		2.976	667.082	200.244		0.093	763.377	209.064
2.604	760.241	232.273		2.79	695.366	194.351		3.069	656.669	197.848		0.186	762.685	209.198
2.697	748.233	229.968		2.883	683.737	190.884		3.162	646.051	194.988		0.279	761.639	209.373
2.79	738.376	226.801		2.976	680.135	182.139		3.255	636.521	192.233		0.372	760.284	209.639
2.883	726.099	224.423		3.069	668.506	179.411		3.348	625.646	189.942		0.465	755.928	210.465
2.976	713.688	222.025		3.162	656.922	176.953		3.441	614.779	187.508		0.558	753.579	209.78
3.069	701.318	219.826		3.255	645.326	174.783		3.534	603.825	185.18		0.651	751.1	209.163
3.162	689.119	217.808		3.348	633.932	172.827		3.627	593.614	183.242		0.744	748.535	208.585
3.255	678.046	215.637		3.441	622.404	171.119		3.72	583.811	181.038		0.837	745.834	208.18
3.348	665.207	212.997		3.534	610.972	169.361		3.813	573.333	178.414		0.93	742.361	207.409
3.441	652.458	210.543		3.627	600	167.213		3.906	561.63	175.585		1.023	738.787	206.745
3.534	639.755	207.918		3.72	589.289	165.566		3.999	550.093	173.059		1.116	735.113	206.024
3.627	627.92	205.782		3.813	577.752	162.977		4.092	537.746	169.844		1.209	731.089	205.22
3.72	618.018	202.904		3.906	563.656	157.917		4.185	525.679	166.881		1.302	727.394	204.256
3.813	605.826	200.565		3.999	552.194	154.864		4.278	514.312	164.124		1.395	721.898	204.377
3.906	592.681	197.78		4.092	541.152	152.555		4.371	503.031	161.174		1.488	717.279	203.744
3.999	579.378	195.008		4.185	529.957	149.769		4.464	491.866	158.449		1.581	712.544	203.109
4.092	565.963	192.341		4.278	518.573	146.843		4.557	480.842	155.746		1.674	707.478	202.474
4.185	551.089	189.332		4.371	508.67	143.734		4.65	469.741	153.297		1.767	703.007	201.266
4.278	538.568	186.471		4.464	495.396	140.335		4.743	459.016	150.779		1.86	697.758	199.656
4.371	525.159	183.349		4.557	484.03	137.498		4.836	447.852	147.861		1.953	692.003	198.104
4.464	512.681	180.458		4.65	473.623	135.114		4.929	436.517	145.071		2.046	686.104	196.608
4.557	499.946	177.748		4.743	461.548	132.596		5.022	426.01	142.201		2.139	680.254	195.195
4.65	489.591	174.043		4.836	450.154	130.278		5.115	415.514	139.127		2.232	674.231	193.834
4.743	479.177	171.319		4.929	442.624	127.986		5.208	403.797	136.833		2.325	668.071	192.639
4.836	466.536	168.17		5.022	431.369	126.09		5.301	392.138	133.902		2.418	661.853	191.274
4.929	454.265	164.943		5.115	419.638	124.352		5.394	380.893	130.916		2.511	655.578	190.06
5.022	443.443	163.621		5.208	407.608	123.301		5.487	369.262	128.579		2.604	649.347	188.847
5.115	431.068	160.685		5.301	395.92	122.065		5.58	358.553	125.872		2.697	643.908	187.529
5.208	416.566	150.481		5.394	385.549	122.162		5.673	350.277	114.743		2.79	637.048	186.154
5.301	406.094	146.921		5.487	373.574	121.253		5.766	339.269	112.942		2.883	629.984	184.866
5.394	394.055	144.024		5.58	362.515	120.302		5.859	328.712	111.322		2.976	622.798	183.659
5.487	383.635	141.689		5.673	354.567	118.876		5.952	318.409	110.413		3.069	615.447	182.386
5.58	373.683	138.908		5.766	347.505	116.555		6.045	308.562	109.218		3.162	608.914	180.865
5.673	365.067	135.646		5.859	344.025	112.601		6.138	305.429	108.655		3.255	600.827	179.204
5.766	353.762	133.906		5.952	335	110.971		6.231	295.985	107.789		3.348	593.136	177.821
5.859	342.685	131.884		6.045	324.676	110.151		6.324	286.21	107.056		3.441	585.263	176.549
5.952	330.673	129.759		6.138	317.365	109.207		6.417	278.728	106.516		3.534	577.237	175.506
6.045	318.707	127.997		6.231	310.371	106.873		6.51	277.128	102.737		3.627	571.198	173.498
6.138	319.833	123.888		6.324	304.169	97.3623		6.603	273.425	100.225		3.72	563.251	171.76
6.231	308.093	122.635		6.417	293.893	96.9821		6.696	265.325	99.0717		3.813	555.229	170.018
6.324	300.344	122.75		6.51	286.897	95.0555		6.789	260.805	96.401		3.906	547.335	168.467
6.417	293.928	120.81		6.603	277.783	93.94		6.882	254.818	94.2218		3.999	539.547	166.742
6.51	284.695	119.497		6.696	270.119	92.5405		6.975	253.419	89.2923		4.092	533.166	164.859
6.603	278.046	118.521		6.789	268.878	89.7603		7.068	253.849	86.0747		4.185	525.48	163.336
6.696	267.58	116.86		6.882	262.334	87.6377		7.161	245.068	82.989		4.278	517.797	162.105
6.789	264.051	114.077		6.975	251.821	86.9628		7.254	235.803	80.2563		4.371	510.19	160.681
6.882	256.846	112.482		7.068	245.051	85.4831		7.347	228.857	77.3655		4.464	502.388	159.289
6.975	247.874	110.998		7.161	236.815	83.5607		7.44	219.976	74.682		4.557	495.637	157.522
7.068	252.598	107.972		7.254	239.195	83.655		7.533	224.723	72.2867		4.65	487.397	155.677
7.161	244.357	107.12		7.347	232.003	83.0463		7.626	219.734	69.9681		4.743	479.338	153.906
7.254	236.686	104.392		7.44	224.342	80.735		7.719	211.703	67.0789		4.836	471.315	152.388
7.347	234.696	102.301		7.533	228.101	77.6593		7.812	205.768	64.9504		4.929	463.104	150.807
7.44	229.167	99.7285		7.626	218.854	77.9684		7.905	198.371	62.0132		5.022	455.372	148.645
7.533	232.614	103.419		7.719	211.993	76.7107		7.998	198.007	56.9725		5.115	446.964	147.31
7.626	227.465	104.811		7.812	201.376	78.0295		8.091	195.053	52.2444		5.208	438.224	145.857
7.719	217.298	103.827		7.905	197.662	80.0734		8.184	190.372	46.4445		5.301	429.622	144.827
7.812	213.552	102.864		7.998	208.456	79.6084		8.277	179.463	45.5108		5.394	421.209	143.776
7.905	203.125	102.554		8.091	198.811	79.7982		8.37	170.259	44.6038		5.487	411.991	141.922
7.998	228.201	107.13		8.184	187.442	76.3631		8.463	168.907	44.6156		5.58	405.196	138.665
8.091	217.746	105.614		8.277	184.172	78.4509		8.556	164.283	41.2266		5.673	396.433	136.963
8.184	226.072	109.816		8.37	174.763	79.0167		8.649	153.787	40.2934		5.766	387.917	135.699
8.277	215.697	108.749										5.859	379.421	134.492
8.37	208.082	111.423										5.952	371.988	133.069
8.463	249.811	126.294										6.045	365.733	131.225
												6.138	358.367	129.888
												6.231	350.404	128.591
												6.324	342.179	127.205
												6.417	337.067	124.953
												6.51	331.131	122.721
												6.603	323.513	121.961
												6.696	316.333	121.424
												6.789	312.549	120.573
												6.882	304.708	119.694
												6.975	300.993	119.575
												7.068	293.377	118.919
												7.161	286.609	118.311
												7.254	282.303	117.651
												7.347	275.631	116.879
												7.44	279.368	117.681
												7.533	272.813	116.642
												7.626	268.247	116.455
												7.719	267.702	116.387
												7.812	263.349	114.878
												7.905	266.683	113.359
												7.998	259.797	112.271
												8.091	257.576	112.352
												8.184	262.084	113.753
												8.277	254.437	112.679
												8.37	255.637	111.243
												8.463	252.45	109.792
												8.556	254.699	109.656
												8.649	256.144	109.122
												8.742	248.853	107.272
												8.835	245.564	108.811
												8.928	238.509	107.843
												9.021	242.596	107.065
												9.114	252.81	103.628
												9.207	244.532	102.347
												9.3	242.726	102.72
												9.393	242.934	102.186
												9.486	235.412	100.899
												9.579	243.068	99.5563
												9.672	235.7	98.2111
												9.765	236.898	99.8966
												9.858	236.29	97.5187
												9.951	228.954	95.5956
												10.044	226.188	93.5902
												10.137	218.84	92.1992
												10.23	226.565	88.8882
												10.323	220.472	87.6752
												10.416	217.102	86.7759
												10.509	213.611	86.1312
												10.602	211.175	84.5459
												10.695	218.035	83.9902
												10.788	255.515	73.3214
												10.881	248.53	73.6549
												10.974	241.546	74.1804
												11.067	234.561	74.8937

## Sheet: Speeds
pil1Δ				pil1Δ				pil1Δ				pil1Δ
Walled cells				Walled cells				Walled cells				Walled cells
ΔP=-1.2 M				ΔP=-1.2 M				ΔP=-1.2 M				Steady state in 1.2 M sorbitol
0 min				2 min				4 min
Speed (um/s)				Speed (um/s)				Speed (um/s)				Speed (um/s)
time	mean	stdev		time	mean	stdev		time	mean	stdev		time	mean	stdev
-6.045	NaN	0.00605		-5.859	NaN	0.02855		-5.58	0.0336557	0.0116894		-8.463	0.0576017	0.0209596
-5.952	NaN	0.0031		-5.766	NaN	0.03479		-5.487	0.0344643	0.0126821		-8.37	0.0500057	0.0215726
-5.859	NaN	0.00015		-5.673	NaN	0.0343994		-5.394	0.0352729	0.0138555		-8.277	0.0484657	0.0189375
-5.766	NaN	0.003955		-5.58	NaN	0.0398253		-5.301	0.0357175	0.0142206		-8.184	0.0469257	0.0166237
-5.673	NaN	0.00776		-5.487	0.059478	0.0367745		-5.208	0.0694439	0.0943249		-8.091	0.0481222	0.0193105
-5.58	NaN	0.011565		-5.394	0.05414	0.0399568		-5.115	0.0655793	0.084213		-7.998	0.046487	0.0162454
-5.487	NaN	0.01537		-5.301	0.0553983	0.0435158		-5.022	0.0640464	0.0772355		-7.905	0.044764	0.0147322
-5.394	NaN	0.0251038		-5.208	0.0566567	0.0472839		-4.929	0.0622707	0.0704648		-7.812	0.0724918	0.0940788
-5.301	0.063858	0.0280322		-5.115	0.057915	0.0512149		-4.836	0.0604771	0.0638598		-7.719	0.0682782	0.0863045
-5.208	0.064924	0.0287725		-5.022	0.0497714	0.0474092		-4.743	0.0586836	0.0574712		-7.626	0.0639109	0.0787378
-5.115	0.0709442	0.0454167		-4.929	0.0619965	0.0423466		-4.65	0.0592708	0.0498474		-7.533	0.0620788	0.0626982
-5.022	0.0689025	0.0405082		-4.836	0.059427	0.0390252		-4.557	0.0600049	0.0474398		-7.44	0.0619409	0.0569268
-4.929	0.0632333	0.034906		-4.743	0.0644541	0.0487211		-4.464	0.0572226	0.0435823		-7.347	0.0603633	0.0518593
-4.836	0.0677493	0.0459703		-4.65	0.0583746	0.0416142		-4.371	0.0616024	0.053823		-7.254	0.0608589	0.0475271
-4.743	0.0659208	0.0411553		-4.557	0.0589276	0.0391161		-4.278	0.0592521	0.052862		-7.161	0.0594827	0.042981
-4.65	0.0597145	0.0369038		-4.464	0.0597326	0.0378888		-4.185	0.0565093	0.048416		-7.068	0.0621386	0.0533286
-4.557	0.0551396	0.033867		-4.371	0.0599674	0.0383393		-4.092	0.0551743	0.0467769		-6.975	0.0611822	0.0504254
-4.464	0.0513361	0.0317387		-4.278	0.0592005	0.0403785		-3.999	0.0528497	0.0453943		-6.882	0.0605379	0.047669
-4.371	0.0467445	0.0303447		-4.185	0.0627222	0.0456962		-3.906	0.0529973	0.048033		-6.789	0.0599756	0.045914
-4.278	0.0437421	0.0294354		-4.092	0.0661292	0.0640011		-3.813	0.0509469	0.0456687		-6.696	0.057898	0.0450269
-4.185	0.0457264	0.0320193		-3.999	0.0632242	0.0619323		-3.72	0.0486748	0.0438853		-6.603	0.056893	0.0449757
-4.092	0.0471094	0.0394519		-3.906	0.0619484	0.0627272		-3.627	0.0473233	0.0434469		-6.51	0.0566673	0.04352
-3.999	0.0471168	0.0372876		-3.813	0.0594948	0.0618509		-3.534	0.0466691	0.0435301		-6.417	0.0564834	0.0451525
-3.906	0.0454057	0.0359061		-3.72	0.0601388	0.0624178		-3.441	0.0453913	0.0439837		-6.324	0.0558032	0.044458
-3.813	0.0440733	0.0327111		-3.627	0.0570421	0.0548147		-3.348	0.0444399	0.0449566		-6.231	0.0549441	0.0444434
-3.72	0.0413674	0.030859		-3.534	0.0563014	0.0533585		-3.255	0.0440444	0.0447011		-6.138	0.0539463	0.0435848
-3.627	0.0423112	0.0321264		-3.441	0.0584371	0.0599637		-3.162	0.0435393	0.0454228		-6.045	0.0531705	0.0432647
-3.534	0.0426679	0.0324656		-3.348	0.0561191	0.0560237		-3.069	0.0431958	0.0472036		-5.952	0.0522578	0.0435386
-3.441	0.045149	0.0438882		-3.255	0.0549645	0.0530234		-2.976	0.043374	0.0503753		-5.859	0.05228	0.0457337
-3.348	0.0441859	0.0432121		-3.162	0.0534414	0.0508678		-2.883	0.0429746	0.0524349		-5.766	0.0520837	0.0449451
-3.255	0.043114	0.0426365		-3.069	0.052598	0.0501213		-2.79	0.0424219	0.0541593		-5.673	0.0508071	0.0431849
-3.162	0.0432497	0.0439423		-2.976	0.0548966	0.0557152		-2.697	0.0423796	0.0534383		-5.58	0.0497715	0.0407255
-3.069	0.0426186	0.0422783		-2.883	0.0535042	0.0554515		-2.604	0.042189	0.052272		-5.487	0.0484479	0.0384271
-2.976	0.0421913	0.0415405		-2.79	0.0523033	0.0547885		-2.511	0.0421198	0.0516199		-5.394	0.0471353	0.0363552
-2.883	0.0419657	0.0391553		-2.697	0.0520091	0.0542391		-2.418	0.0419924	0.0508501		-5.301	0.046213	0.0348323
-2.79	0.0412723	0.0379202		-2.604	0.0518791	0.0530479		-2.325	0.0419243	0.0502824		-5.208	0.0459307	0.0342555
-2.697	0.041162	0.037344		-2.511	0.0519119	0.0519882		-2.232	0.0423207	0.0496545		-5.115	0.0446973	0.0323459
-2.604	0.0409984	0.0383161		-2.418	0.0522824	0.0518391		-2.139	0.0427937	0.0497785		-5.022	0.0438438	0.0314554
-2.511	0.0426393	0.0436745		-2.325	0.0526932	0.0519742		-2.046	0.0434527	0.0503894		-4.929	0.0427323	0.0300421
-2.418	0.0425965	0.0432474		-2.232	0.0534212	0.0527474		-1.953	0.04409	0.0503758		-4.836	0.0417814	0.0294822
-2.325	0.0423633	0.0422879		-2.139	0.0539148	0.0525905		-1.86	0.0450371	0.0508664		-4.743	0.0410735	0.0293257
-2.232	0.0428445	0.0401166		-2.046	0.0555943	0.0520994		-1.767	0.0464812	0.0492089		-4.65	0.0405885	0.029129
-2.139	0.0435457	0.0388667		-1.953	0.0576482	0.0526825		-1.674	0.0480617	0.0483206		-4.557	0.0398648	0.0294794
-2.046	0.0450196	0.038895		-1.86	0.0594871	0.0514071		-1.581	0.0496583	0.0477373		-4.464	0.0393387	0.0294854
-1.953	0.0466107	0.0382119		-1.767	0.0612015	0.0500249		-1.488	0.0515703	0.0474714		-4.371	0.0388042	0.0300656
-1.86	0.0485682	0.038374		-1.674	0.0636615	0.0468077		-1.395	0.0538079	0.0474251		-4.278	0.0379973	0.0306364
-1.767	0.051253	0.0394991		-1.581	0.0665788	0.0446082		-1.302	0.0560079	0.0474226		-4.185	0.0377492	0.0314213
-1.674	0.0541813	0.0417497		-1.488	0.0695349	0.0438828		-1.209	0.0584046	0.0479872		-4.092	0.0373828	0.0327705
-1.581	0.0572476	0.0436883		-1.395	0.0721964	0.0444628		-1.116	0.0607412	0.049058		-3.999	0.0369964	0.0326961
-1.488	0.0606894	0.0468046		-1.302	0.0748311	0.0461122		-1.023	0.0632232	0.0507004		-3.906	0.0366003	0.0331423
-1.395	0.0642398	0.0508188		-1.209	0.0778364	0.0488197		-0.93	0.0656856	0.0526854		-3.813	0.0361704	0.032294
-1.302	0.0678981	0.0549733		-1.116	0.0798776	0.0517392		-0.837	0.068553	0.0568461		-3.72	0.036117	0.0319487
-1.209	0.0715123	0.0588111		-1.023	0.0822562	0.0555923		-0.744	0.0700795	0.0560452		-3.627	0.0359351	0.031934
-1.116	0.0736794	0.0577847		-0.93	0.0847472	0.0582694		-0.651	0.0720007	0.0562491		-3.534	0.0355825	0.0309621
-1.023	0.0758588	0.0577494		-0.837	0.0869512	0.0614815		-0.558	0.0732379	0.0558885		-3.441	0.0352495	0.0296647
-0.93	0.0777932	0.0584525		-0.744	0.0879022	0.0600754		-0.465	0.0740672	0.0558665		-3.348	0.03503	0.0288528
-0.837	0.0785965	0.0565795		-0.651	0.0891039	0.0590877		-0.372	0.0743173	0.0551592		-3.255	0.0347147	0.0277461
-0.744	0.0795644	0.0550381		-0.558	0.0891653	0.0580187		-0.279	0.0747211	0.0551352		-3.162	0.0345892	0.027318
-0.651	0.0801402	0.0533355		-0.465	0.0918091	0.0617534		-0.186	0.075186	0.0558056		-3.069	0.0346605	0.0273424
-0.558	0.080362	0.0525347		-0.372	0.0922838	0.0612668		-0.093	0.0754524	0.0573132		-2.976	0.0346354	0.0276258
-0.465	0.0805512	0.0530364		-0.279	0.0925355	0.061829		0	0.075689	0.0578156		-2.883	0.0348805	0.0283838
-0.372	0.0802721	0.0508168		-0.186	0.092152	0.061145		0.093	0.0759963	0.0570666		-2.79	0.03523	0.0270368
-0.279	0.0800968	0.0496021		-0.093	0.0921442	0.0617581		0.186	0.0769765	0.0571222		-2.697	0.0357763	0.0263725
-0.186	0.0806243	0.0495841		0	0.0918192	0.061581		0.279	0.0778865	0.0576155		-2.604	0.0366491	0.0262723
-0.093	0.0811993	0.0506591		0.093	0.0913138	0.0614009		0.372	0.078867	0.0572823		-2.511	0.0376482	0.0267485
0	0.0813219	0.0521777		0.186	0.0914599	0.0610461		0.465	0.0802113	0.0563799		-2.418	0.0388617	0.0277948
0.093	0.081734	0.0531714		0.279	0.0921593	0.0603818		0.558	0.0818521	0.0564281		-2.325	0.0401874	0.0289957
0.186	0.0820042	0.0541866		0.372	0.0928924	0.060788		0.651	0.0833768	0.0575276		-2.232	0.0415646	0.0307577
0.279	0.0828443	0.0554752		0.465	0.0930576	0.0605109		0.744	0.0847181	0.0592553		-2.139	0.0430561	0.0316593
0.372	0.0839334	0.0572531		0.558	0.0925463	0.0599004		0.837	0.0861296	0.0616245		-2.046	0.044676	0.0328772
0.465	0.0850235	0.0599319		0.651	0.0921628	0.0598921		0.93	0.0872156	0.0634078		-1.953	0.0464269	0.034442
0.558	0.0865471	0.0598895		0.744	0.0916156	0.0589964		1.023	0.0876989	0.0627946		-1.86	0.04825	0.0356093
0.651	0.0881464	0.0604863		0.837	0.0912182	0.0588874		1.116	0.0884173	0.0625536		-1.767	0.050205	0.0367681
0.744	0.0897156	0.0613786		0.93	0.0913986	0.0598599		1.209	0.0891571	0.0625566		-1.674	0.0520168	0.0371926
0.837	0.0912989	0.0619265		1.023	0.0920572	0.0605369		1.302	0.0898797	0.0611221		-1.581	0.0537956	0.0379348
0.93	0.0932566	0.0632059		1.116	0.0924975	0.0610197		1.395	0.0904356	0.0597918		-1.488	0.0554065	0.0380928
1.023	0.0948911	0.0641138		1.209	0.0931961	0.0594001		1.488	0.0911246	0.0588712		-1.395	0.0570455	0.0379088
1.116	0.0971272	0.0662839		1.302	0.0938892	0.058855		1.581	0.0916562	0.0584098		-1.302	0.05866	0.0383256
1.209	0.0989924	0.0676417		1.395	0.0950036	0.0594243		1.674	0.0922218	0.0579926		-1.209	0.0601481	0.0389493
1.302	0.100716	0.0699305		1.488	0.0965478	0.0600235		1.767	0.0930768	0.0587566		-1.116	0.0615303	0.0396843
1.395	0.10238	0.0733022		1.581	0.0978628	0.0612393		1.86	0.0941489	0.0601764		-1.023	0.0628174	0.0405061
1.488	0.102516	0.0717128		1.674	0.0990206	0.06223		1.953	0.0951502	0.0600379		-0.93	0.0638708	0.0400994
1.581	0.102343	0.070096		1.767	0.100542	0.0637306		2.046	0.096372	0.0602591		-0.837	0.0648572	0.0397974
1.674	0.101938	0.0682591		1.86	0.101598	0.0638459		2.139	0.0977161	0.0614118		-0.744	0.065769	0.0398783
1.767	0.10175	0.0660275		1.953	0.102138	0.0636618		2.232	0.0989195	0.0624892		-0.651	0.0669032	0.0405582
1.86	0.101098	0.0646051		2.046	0.103559	0.0630768		2.325	0.0999236	0.0624771		-0.558	0.0680876	0.0417694
1.953	0.101373	0.0627486		2.139	0.103755	0.0623863		2.418	0.100854	0.0618348		-0.465	0.0690228	0.0422631
2.046	0.101527	0.0623143		2.232	0.104054	0.0627031		2.511	0.102018	0.0620985		-0.372	0.070123	0.0435448
2.139	0.101572	0.0628321		2.325	0.104574	0.0621456		2.604	0.103436	0.0631286		-0.279	0.0714078	0.0452728
2.232	0.101543	0.0640724		2.418	0.105845	0.0621678		2.697	0.104516	0.0639582		-0.186	0.0727066	0.0466897
2.325	0.101775	0.0666266		2.511	0.107108	0.0634628		2.79	0.105803	0.0655602		-0.093	0.0740376	0.0484727
2.418	0.103321	0.0671622		2.604	0.108387	0.0643623		2.883	0.106816	0.0651775		0	0.0755095	0.0495201
2.511	0.105221	0.0690116		2.697	0.109636	0.066318		2.976	0.107908	0.0647911		0.093	0.0770119	0.0509469
2.604	0.107301	0.0711654		2.79	0.110925	0.0686119		3.069	0.108496	0.0640565		0.186	0.0784667	0.052278
2.697	0.109006	0.0738482		2.883	0.112325	0.0703745		3.162	0.109267	0.0634855		0.279	0.0795421	0.052664
2.79	0.109464	0.0753031		2.976	0.110111	0.0686674		3.255	0.109824	0.0633404		0.372	0.0806467	0.0526189
2.883	0.109773	0.0750912		3.069	0.111329	0.0703228		3.348	0.110757	0.0634271		0.465	0.0815063	0.0522288
2.976	0.109701	0.073781		3.162	0.112276	0.0723024		3.441	0.111461	0.0635435		0.558	0.0826547	0.0526718
3.069	0.109892	0.0733017		3.255	0.112733	0.0743676		3.534	0.111871	0.0640456		0.651	0.0837177	0.053242
3.162	0.110345	0.073531		3.348	0.112295	0.0751693		3.627	0.112452	0.0650623		0.744	0.084801	0.0542854
3.255	0.110812	0.0745146		3.441	0.112211	0.0767461		3.72	0.11266	0.0661764		0.837	0.0855391	0.0550255
3.348	0.111039	0.0712674		3.534	0.111921	0.075661		3.813	0.11333	0.065725		0.93	0.0860238	0.0546756
3.441	0.111004	0.0685339		3.627	0.111764	0.074576		3.906	0.114128	0.0655036		1.023	0.0866468	0.054598
3.534	0.111129	0.0670721		3.72	0.111341	0.0733953		3.999	0.115517	0.0659283		1.116	0.0872992	0.0550855
3.627	0.111994	0.066562		3.813	0.111767	0.0729702		4.092	0.116637	0.0664995		1.209	0.0879193	0.0558145
3.72	0.112681	0.0668896		3.906	0.113389	0.0737473		4.185	0.116184	0.0643189		1.302	0.0885548	0.0564684
3.813	0.114075	0.0677664		3.999	0.114975	0.0747968		4.278	0.117917	0.0653025		1.395	0.0891005	0.0565489
3.906	0.11584	0.0693906		4.092	0.116749	0.0772025		4.371	0.11933	0.0670201		1.488	0.0897897	0.0569626
3.999	0.117645	0.0712659		4.185	0.118608	0.0786054		4.464	0.120663	0.069136		1.581	0.0903406	0.0570134
4.092	0.119294	0.073307		4.278	0.120604	0.077444		4.557	0.122161	0.0718774		1.674	0.0908104	0.0566987
4.185	0.120888	0.0766584		4.371	0.12264	0.0775192		4.65	0.122763	0.0744254		1.767	0.0916616	0.0568515
4.278	0.122596	0.0766903		4.464	0.125111	0.0770952		4.743	0.123664	0.0750702		1.86	0.0925055	0.0567168
4.371	0.12366	0.0767402		4.557	0.127086	0.0767871		4.836	0.124467	0.075142		1.953	0.0930963	0.0566601
4.464	0.124773	0.0759907		4.65	0.129064	0.0761283		4.929	0.124867	0.0752557		2.046	0.0935891	0.0567874
4.557	0.126029	0.0762156		4.743	0.131041	0.0740859		5.022	0.125821	0.0759566		2.139	0.0943937	0.0569331
4.65	0.127741	0.0768761		4.836	0.131252	0.07278		5.115	0.126342	0.0755776		2.232	0.0949204	0.0569317
4.743	0.129084	0.0759161		4.929	0.133167	0.0720661		5.208	0.127004	0.0748134		2.325	0.0948198	0.0561318
4.836	0.129613	0.0761858		5.022	0.13412	0.0735943		5.301	0.127969	0.074623		2.418	0.094792	0.055897
4.929	0.130074	0.075942		5.115	0.134819	0.073734		5.394	0.129155	0.0751527		2.511	0.0946798	0.0560415
5.022	0.130438	0.0763954		5.208	0.135689	0.0740138		5.487	0.130388	0.0766805		2.604	0.0945391	0.0562712
5.115	0.130816	0.0783238		5.301	0.136469	0.0759603		5.58	0.131209	0.0794654		2.697	0.0945529	0.056649
5.208	0.133302	0.0774179		5.394	0.137024	0.07658		5.673	0.128486	0.0758848		2.79	0.0946271	0.0558637
5.301	0.135069	0.0773125		5.487	0.138371	0.0772205		5.766	0.130505	0.0768048		2.883	0.0948973	0.0557209
5.394	0.135564	0.0772093		5.58	0.139661	0.0778405		5.859	0.133091	0.0786818		2.976	0.0952843	0.0557591
5.487	0.136288	0.0783604		5.673	0.139589	0.0756052		5.952	0.134848	0.0802738		3.069	0.0953876	0.0556936
5.58	0.135574	0.0775613		5.766	0.139748	0.0759984		6.045	0.136683	0.0825455		3.162	0.0957197	0.0559468
5.673	0.135946	0.0776349		5.859	0.141216	0.0733581		6.138	0.138465	0.0815844		3.255	0.0965671	0.05563
5.766	0.136276	0.0782208		5.952	0.143663	0.0756516		6.231	0.140168	0.0829991		3.348	0.0976222	0.0564187
5.859	0.135384	0.0767426		6.045	0.145822	0.0792935		6.324	0.141543	0.0846835		3.441	0.0990278	0.0580019
5.952	0.136415	0.0786984		6.138	0.147404	0.0814923		6.417	0.13926	0.0808805		3.534	0.100505	0.060059
6.045	0.138378	0.0813646		6.231	0.148331	0.0854316		6.51	0.140011	0.0816136		3.627	0.102013	0.061708
6.138	0.139675	0.0822121		6.324	0.144428	0.0820204		6.603	0.138304	0.0809444		3.72	0.103345	0.0614576
6.231	0.141173	0.0824888		6.417	0.143362	0.0817961		6.696	0.139294	0.0809735		3.813	0.104686	0.0619611
6.324	0.143672	0.0820635		6.51	0.143459	0.0809424		6.789	0.139086	0.0806297		3.906	0.105984	0.0627099
6.417	0.147036	0.0809586		6.603	0.146777	0.081728		6.882	0.137864	0.0805456		3.999	0.107436	0.0637657
6.51	0.147553	0.0800242		6.696	0.148777	0.0839604		6.975	0.138379	0.0820258		4.092	0.108791	0.0651803
6.603	0.1471	0.0700164		6.789	0.148071	0.0835601		7.068	0.139328	0.080667		4.185	0.109921	0.0648391
6.696	0.149912	0.0713531		6.882	0.148143	0.086771		7.161	0.138985	0.0816464		4.278	0.11109	0.0654941
6.789	0.148548	0.0733507		6.975	0.150765	0.0889425		7.254	0.142156	0.0843791		4.371	0.111721	0.0656376
6.882	0.146841	0.0727345		7.068	0.144396	0.076736		7.347	0.143367	0.0877659		4.464	0.112252	0.0662294
6.975	0.149306	0.0795449		7.161	0.146365	0.0801788		7.44	0.145962	0.0931304		4.557	0.113187	0.067012
7.068	0.146402	0.077426		7.254	0.146716	0.0821545		7.533	0.133141	0.0841774		4.65	0.113332	0.066767
7.161	0.147871	0.0816532		7.347	0.149274	0.0858189		7.626	0.132235	0.0829046		4.743	0.113825	0.067129
7.254	0.147952	0.0837682		7.44	0.149732	0.0889576		7.719	0.132285	0.0835758		4.836	0.114521	0.0680421
7.347	0.149673	0.0902937		7.533	0.14886	0.0956552		7.812	0.13429	0.0846328		4.929	0.11546	0.0694204
7.44	0.149778	0.0949077		7.626	0.152948	0.100242		7.905	0.138764	0.0872692		5.022	0.116299	0.0706072
7.533	0.142473	0.0946687		7.719	0.139823	0.0807877		7.998	0.130523	0.0757063		5.115	0.117009	0.0707979
7.626	0.135337	0.0797579		7.812	0.142949	0.0878729		8.091	0.131666	0.0752383		5.208	0.117898	0.0716931
7.719	0.136549	0.0778836		7.905	0.136793	0.0882781		8.184	0.134055	0.0802853		5.301	0.118952	0.07279
7.812	0.140332	0.0790624		7.998	0.137486	0.0983018		8.277	0.13297	0.081937		5.394	0.120192	0.0740583
7.905	0.142184	0.080334		8.091	0.138241	0.107585		8.37	0.136585	0.0875602		5.487	0.120632	0.074168
7.998	0.145152	0.0892634		8.184	0.154876	0.111326		8.463	0.117626	0.0866295		5.58	0.121937	0.0729219
8.091	0.146464	0.0901285		8.277	0.144892	0.115054		8.556	0.106794	0.0782091		5.673	0.123083	0.0727245
8.184	0.127434	0.0666283		8.37	0.138131	0.125541		8.649	0.111339	0.0755879		5.766	0.123858	0.0727342
8.277	0.126758	0.0630842		8.463	0.101431	0.0345498		8.742	0.149188	0.0873554		5.859	0.123901	0.0728922
8.37	0.129727	0.0612241		8.556	0.10084	0.0369499		8.835	0.14925	0.0786789		5.952	0.123998	0.0731158
8.463	0.124113	0.0696333		8.649	0.100659	0.0393991		8.928	0.149312	0.071545		6.045	0.124342	0.0736144
8.556	0.129578	0.0816173		8.742	0.100477	0.0438617		9.021	0.163644	0.0638531		6.138	0.124746	0.0740258
				8.835	0.100296	0.0497995						6.231	0.124971	0.0752893
				8.928	0.118404	0.0539269						6.324	0.124955	0.0762749
												6.417	0.12462	0.076745
												6.51	0.12488	0.0768755
												6.603	0.125177	0.0753395
												6.696	0.124928	0.0732995
												6.789	0.125225	0.0716691
												6.882	0.125857	0.0715165
												6.975	0.126617	0.0698437
												7.068	0.127274	0.0702738
												7.161	0.12752	0.0706564
												7.254	0.128082	0.0713489
												7.347	0.128622	0.0723114
												7.44	0.125956	0.068861
												7.533	0.125912	0.0695584
												7.626	0.12481	0.0680148
												7.719	0.126117	0.0677269
												7.812	0.127418	0.069069
												7.905	0.127737	0.0696276
												7.998	0.129252	0.0707196
												8.091	0.130083	0.0726649
												8.184	0.129989	0.0696623
												8.277	0.131497	0.0719464
												8.37	0.128951	0.0680929
												8.463	0.131435	0.0689396
												8.556	0.130241	0.0721067
												8.649	0.128625	0.0706124
												8.742	0.131169	0.0732597
												8.835	0.13122	0.0748307
												8.928	0.132708	0.0774794
												9.021	0.134436	0.0765338
												9.114	0.135218	0.0791456
												9.207	0.138179	0.0834968
												9.3	0.136715	0.0776124
												9.393	0.138195	0.078491
												9.486	0.140291	0.0817208
												9.579	0.143309	0.0851707
												9.672	0.144774	0.0865923
												9.765	0.145603	0.0910885
												9.858	0.144156	0.0864527
												9.951	0.144164	0.0874025
												10.044	0.144637	0.0905919
												10.137	0.145089	0.0935498
												10.23	0.145873	0.0862125
												10.323	0.144799	0.0819145
												10.416	0.145098	0.0779842
												10.509	0.13513	0.0714521
												10.602	0.132332	0.0710209
												10.695	0.132965	0.0732598
												10.788	0.124747	0.0746315
												10.881	0.122588	0.0753563
												10.974	0.119467	0.0798627
												11.067	0.117135	0.0843644
												11.16	0.113768	0.0720758
												11.253	0.114327	0.0720509
												11.346	0.114885	0.0729103
												11.439	0.115443	0.0746233
												11.532	0.116002	0.0771332
												11.625	0.11656	0.0803654
												11.718	0.118477	0.0827427
												11.811	0.120393	0.0857732
												11.904	0.124032	0.0883747
												11.997	0.12767	0.0917537
												12.09	0.094076	0.0568529

## Sheet: ANOVA (#)
One -way ANOVA at time 0s
Significance level	α =	0.05
	mean	stdev	N
0 min	934.497	242.254	176
2 min	898.178	238.977	145
4 min	850.473	215.075	326
Steady-state	763.484	208.929	583
						ANOVA between 0 min and steady-state	ANOVA between 0 min, 2 min and 4 min	ANOVA between 0 min and 2 min	ANOVA between 2 min and 4 min	ANOVA between 4 min and steady-state
Overall mean	m=	826.888				803.139	884.021	918.091	865.159	794.681
Between-group degrees of freedom	dfb=	3				1	2	1	1	1
Between-group mean square value	MSb=	1.76666e+06				3.95363e+06	422193	104868	228401	1.58214e+06
Within-group degrees of freedom	dfw=	1226				757	644	319	469	907
Within-group mean square value	MSw=	48069.3				47127.4	52061.8	57975.3	49589.6	44585.2
F-ratio	F=	36.7523				83.8925	8.10946	1.80883	4.60582	35.4858
Critical value	Fcrit=	2.61216				3.85377	3.00971	3.87077	3.86136	3.85173
p-value	p=	0				0	0.000332447	0.179604	0.032376	3.67236e-09
The difference between conditions is statistically significant						The difference between 0 min and steady-state is statistically significant	The difference between 0 min, 2 min and 4 min is statistically significant	The difference between 0 min and 2 min is not statistically significant	The difference between 2 min and 4 min is statistically significant	The difference between 4 min and steady-state is statistically significant
