# Supplementary material for: Rapid adaptation of endocytosis, exocytosis, and eisosomes after an acute increase in membrane tension in yeast cells
Source: eLife. 2021 May 13;10:e62084. doi: 10.7554/eLife.62084 (PMC9045820; doi:10.7554/eLife.62084)
Supplement: Figure 7—figure supplement 1—source data 1. [file elife-62084-fig7-figsupp1-data1.xlsx]

## Sheet: Number of molecules
WT				WT				WT				WT				WT
Protoplasts				Protoplasts				Protoplasts				Protoplasts				Walled cells
steady state in 1.2M sorbitol				steady state in 0.8M sorbitol				steady state in 0.4M sorbitol				steady state in 0.25M sorbitol				steady state in 0M sorbitol
N=	143			N=	151			N=	682			N=	395			N=	234
Number of molecules (#)				Number of molecules (#)				Number of molecules (#)				Number of molecules (#)				Number of molecules (#)
time	mean	stdev		time	mean	stdev		time	mean	stdev		time	mean	stdev		time	mean	stdev
-15.438	166.561	148.034		-9.393	179.04	91.4303		-6.603	165.3	98.184		-6.603	114.542	40.1707		-8.277	124.029	59.7967
-15.345	165.992	143.842		-9.3	185.301	92.5648		-6.51	187.404	128.165		-6.51	126.661	41.0134		-8.184	132.066	60.0303
-15.252	168.138	143.548		-9.207	190.276	91.1724		-6.417	197.132	125.866		-6.417	137.756	44.6299		-8.091	139.026	61.3005
-15.159	166.858	141.962		-9.114	195.809	91.3565		-6.324	208.093	128.249		-6.324	148.7	47.1141		-7.998	145.37	63.6841
-15.066	165.248	137.863		-9.021	198.708	91.7244		-6.231	209.313	124.326		-6.231	159.099	49.8836		-7.905	151.915	63.9346
-14.973	167.553	137.611		-8.928	202.766	91.3045		-6.138	215.45	122.59		-6.138	168.321	53.9436		-7.812	153.703	63.4671
-14.88	167.918	135.662		-8.835	206.058	89.9997		-6.045	219.31	120.963		-6.045	173.7	57.5595		-7.719	159.707	63.1718
-14.787	170.406	135.408		-8.742	207.165	88.8498		-5.952	224.974	120.756		-5.952	176.619	61.3806		-7.626	156.146	61.603
-14.694	169.729	134.332		-8.649	207.621	88.7035		-5.859	230.389	118.41		-5.859	188.257	66.0158		-7.533	155.487	58.5774
-14.601	167.675	129.614		-8.556	216.769	85.1902		-5.766	229.798	114.303		-5.766	188.708	67.1538		-7.44	156.369	56.9394
-14.508	173.103	131.802		-8.463	222.729	86.3212		-5.673	238.026	117.896		-5.673	205.649	76.4964		-7.347	164.832	58.6792
-14.415	171.006	127.428		-8.37	227.995	85.8009		-5.58	247.333	118.75		-5.58	218.412	78.11		-7.254	170.906	58.1668
-14.322	171.036	125.717		-8.277	234.404	88.5798		-5.487	254.453	118.325		-5.487	231.571	80.9462		-7.161	175.218	59.9313
-14.229	174.292	125.878		-8.184	240.917	88.8332		-5.394	260.748	119.537		-5.394	241.274	85.1457		-7.068	184.03	66.3564
-14.136	172.994	123.632		-8.091	238.894	90.22		-5.301	269.051	120.284		-5.301	262.858	119.605		-6.975	189.29	67.1885
-14.043	174.949	121.768		-7.998	244.846	89.592		-5.208	278.247	121.245		-5.208	273.206	119.3		-6.882	197.458	67.5171
-13.95	176.936	121.361		-7.905	252.153	89.7297		-5.115	285.492	121.19		-5.115	277.698	121.09		-6.789	201.659	67.915
-13.857	180.108	121.823		-7.812	253.559	91.7841		-5.022	297.346	121.384		-5.022	287.179	120.734		-6.696	205.909	66.9952
-13.764	179.071	120.405		-7.719	256.774	92.4751		-4.929	311.757	123.263		-4.929	297.349	120.184		-6.603	209.311	68.329
-13.671	182.428	120.828		-7.626	262.095	92.6163		-4.836	318.998	126.269		-4.836	313.055	129.847		-6.51	212.659	70.4796
-13.578	185.869	121.296		-7.533	268.665	92.2685		-4.743	330.753	128.643		-4.743	335.116	133.904		-6.417	217.852	72.3247
-13.485	189.737	121.02		-7.44	272.73	92.9055		-4.65	342.335	129.976		-4.65	353.942	134.732		-6.324	223.162	74.6883
-13.392	191.578	120.512		-7.347	279.152	92.4067		-4.557	353.538	130.491		-4.557	371.924	135.962		-6.231	227.306	77.0482
-13.299	193.924	119.707		-7.254	280.961	93.3044		-4.464	367.144	130.677		-4.464	390.591	136.657		-6.138	233.446	78.1082
-13.206	197.861	119.426		-7.161	287.608	93.1495		-4.371	382.52	131.042		-4.371	409.75	138.628		-6.045	241.758	80.0729
-13.113	201.952	119.025		-7.068	291.86	94.5837		-4.278	398.569	131.374		-4.278	428.65	141.863		-5.952	249.986	81.2015
-13.02	202.03	118.682		-6.975	299.589	94.3444		-4.185	415.102	131.642		-4.185	450.346	142.823		-5.859	258.029	82.927
-12.927	204.917	116.701		-6.882	308.32	100.055		-4.092	431.31	131.131		-4.092	471.345	143.652		-5.766	263.219	84.6397
-12.834	209.034	116.483		-6.789	308.477	104.386		-3.999	444.092	138.39		-3.999	489.397	153.345		-5.673	270.328	87.0575
-12.741	209.709	116.02		-6.696	312.801	106.137		-3.906	458.481	140.134		-3.906	511.835	154.7		-5.58	278.056	89.3803
-12.648	213.769	115.886		-6.603	319.173	106.588		-3.813	475.422	140.976		-3.813	536.198	155.581		-5.487	287.067	91.025
-12.555	218.193	116.088		-6.51	326.492	106.16		-3.72	492.139	141.86		-3.72	560.268	156.146		-5.394	295.772	92.0957
-12.462	219.965	115.551		-6.417	327.752	108.667		-3.627	509.347	142.934		-3.627	583.935	157.793		-5.301	304.461	93.9499
-12.369	224.427	115.769		-6.324	335.856	109.459		-3.534	527.062	144.115		-3.534	608.774	159.603		-5.208	313.889	95.7506
-12.276	228.841	115.984		-6.231	342.298	109.116		-3.441	544.898	145.635		-3.441	633.076	161.516		-5.115	325.484	97.1648
-12.183	233.177	116.227		-6.138	348.478	109.408		-3.348	562.808	147.563		-3.348	657.636	164.152		-5.022	335.084	98.6857
-12.09	234.546	116.147		-6.045	356.249	107.891		-3.255	580.874	149.247		-3.255	687.071	171.857		-4.929	345.356	100.022
-11.997	236.887	116.741		-5.952	359.145	111.22		-3.162	599.402	164.078		-3.162	709.823	177.537		-4.836	354.025	102.395
-11.904	241.245	117.081		-5.859	367.93	111.028		-3.069	616.766	166.543		-3.069	735.665	180.922		-4.743	363.315	104.092
-11.811	242.377	117.387		-5.766	376.479	111.68		-2.976	635.246	168.477		-2.976	761.944	184.903		-4.65	373.777	105.381
-11.718	243.618	117.873		-5.673	384.564	113.159		-2.883	653.52	170.003		-2.883	787.717	189.157		-4.557	384.767	106.276
-11.625	246.445	116.383		-5.58	395.613	112.245		-2.79	672.265	172.127		-2.79	813.539	193.708		-4.464	394.954	106.958
-11.532	251.63	115.827		-5.487	405.873	111.598		-2.697	690.613	174.406		-2.697	839.402	198.937		-4.371	405.032	108.302
-11.439	256.754	114.466		-5.394	415.424	111.071		-2.604	709.274	177.185		-2.604	865.07	204.726		-4.278	415.699	108.875
-11.346	260.775	113.8		-5.301	426.489	111.034		-2.511	727.859	180.189		-2.511	890.838	210.906		-4.185	428.35	112.326
-11.253	263.173	111.882		-5.208	437.486	110.291		-2.418	746.622	183.412		-2.418	917.524	217.542		-4.092	439.118	113.347
-11.16	267.585	111.425		-5.115	449.466	114.941		-2.325	771.196	199.202		-2.325	942.658	224.703		-3.999	448.689	115.546
-11.067	273.496	110.934		-5.022	459.898	115.843		-2.232	789.034	202.241		-2.232	967.389	231.773		-3.906	459.515	116.335
-10.974	275.366	112.249		-4.929	469.769	116.116		-2.139	806.697	205.532		-2.139	991.184	238.772		-3.813	470.124	117.121
-10.881	279.097	112.52		-4.836	480.601	116.43		-2.046	824.026	208.379		-2.046	1013.25	244.938		-3.72	480.829	117.501
-10.788	286.165	111.707		-4.743	493.185	118.516		-1.953	840.491	211.579		-1.953	1034	251.097		-3.627	492.38	118.304
-10.695	292.032	111.377		-4.65	503.937	119.283		-1.86	855.923	214.091		-1.86	1053.58	257.469		-3.534	503.105	120.182
-10.602	298.031	110.915		-4.557	514.581	120.268		-1.767	871.005	216.725		-1.767	1073.07	264.328		-3.441	515.26	121.459
-10.509	303.951	110.579		-4.464	525.521	121.338		-1.674	885.256	219.406		-1.674	1092.03	271.845		-3.348	527.655	122.755
-10.416	310.73	109.894		-4.371	535.64	122.148		-1.581	898.762	222.101		-1.581	1110.02	279.711		-3.255	540.206	123.63
-10.323	316.646	109.734		-4.278	547.498	123.642		-1.488	910.956	225.612		-1.488	1119.41	298.478		-3.162	552.221	125.585
-10.23	322.551	109.491		-4.185	558.047	124.856		-1.395	923.606	228.7		-1.395	1135.55	307.107		-3.069	565.137	127.562
-10.137	326.856	110.03		-4.092	568.538	126.454		-1.302	935.183	231.059		-1.302	1150.41	315.196		-2.976	578.158	129.718
-10.044	333.154	109.679		-3.999	579.203	128.327		-1.209	945.897	233.496		-1.209	1163.62	322.238		-2.883	591.127	132.049
-9.951	335.64	109.885		-3.906	590.043	129.979		-1.116	955.788	235.808		-1.116	1174.9	329.833		-2.79	604.206	134.56
-9.858	341.946	109.384		-3.813	600.984	131.516		-1.023	964.01	238.257		-1.023	1185.68	337.956		-2.697	616.888	137.146
-9.765	348.427	108.302		-3.72	611.974	132.905		-0.93	971.636	240.14		-0.93	1195.61	345.321		-2.604	629.09	138.902
-9.672	354.704	107.394		-3.627	622.914	134.513		-0.837	977.766	242		-0.837	1204.13	352.949		-2.511	641.697	141.047
-9.579	360.914	106.643		-3.534	633.501	135.993		-0.744	976.166	253.348		-0.744	1214.92	362.379		-2.418	655.893	146.446
-9.486	367.096	106.022		-3.441	644.405	137.907		-0.651	981.015	255.343		-0.651	1200.39	396.231		-2.325	668.275	148.929
-9.393	374.531	106.616		-3.348	655.445	140.277		-0.558	985.98	257.755		-0.558	1207.97	402.716		-2.232	680.661	150.936
-9.3	380.261	105.745		-3.255	666.447	142.834		-0.465	990.079	260.036		-0.465	1214.47	408.954		-2.139	692.73	152.793
-9.207	386.417	105.42		-3.162	677.513	145.291		-0.372	993.228	262.197		-0.372	1219.62	414.43		-2.046	704.529	154.536
-9.114	392.615	105.244		-3.069	688.254	147.206		-0.279	995.832	263.502		-0.279	1223.35	419.391		-1.953	715.735	156.236
-9.021	398.973	105.101		-2.976	698.792	149.487		-0.186	997.783	265.115		-0.186	1226.18	422.191		-1.86	726.365	157.953
-8.928	406.18	104.972		-2.883	709.193	151.722		-0.093	998.773	266.681		-0.093	1228.4	426.15		-1.767	736.862	159.842
-8.835	412.915	104.688		-2.79	719.484	154.092		0	1000.2	267.07		0	1239.05	427.233		-1.674	747.079	161.534
-8.742	420.315	103.753		-2.697	728.445	156.763		0.093	999.167	267.284		0.093	1230.11	421.923		-1.581	756.573	162.978
-8.649	427.487	103.642		-2.604	738.31	159.74		0.186	984.42	280.527		0.186	1219.38	432.074		-1.488	761.28	170.512
-8.556	434.621	103.704		-2.511	747.596	162.368		0.279	983.49	280.339		0.279	1212.47	440.924		-1.395	769.404	171.941
-8.463	442.201	103.414		-2.418	756.413	164.737		0.372	982.322	280.382		0.372	1213.04	441.949		-1.302	776.712	173.546
-8.37	449.757	103.758		-2.325	764.648	166.236		0.465	980.822	280.685		0.465	1213.13	443.053		-1.209	784.146	174.917
-8.277	457.273	104.33		-2.232	772.431	167.412		0.558	979.117	281.226		0.558	1212.49	445.805		-1.116	790.589	176.023
-8.184	464.702	104.871		-2.139	779.965	168.629		0.651	976.929	281.532		0.651	1208.93	445.288		-1.023	796.507	176.71
-8.091	469.377	106.566		-2.046	786.986	169.844		0.744	974.542	281.401		0.744	1206.12	445.69		-0.93	801.269	177.152
-7.998	476.75	106.894		-1.953	793.541	171.682		0.837	972.197	281.926		0.837	1210.06	446.781		-0.837	805.489	177.562
-7.905	483.963	107.398		-1.86	799.65	173.13		0.93	971.597	280.982		0.93	1209.8	445.228		-0.744	808.851	177.507
-7.812	491.148	108.113		-1.767	803.177	176.974		1.023	951.79	296.017		1.023	1142.69	483.886		-0.651	803.534	184.158
-7.719	498.255	108.8		-1.674	808.86	178.47		1.116	947.256	294.028		1.116	1139.14	477.884		-0.558	806.387	184.6
-7.626	505.346	109.698		-1.581	814.377	179.874		1.209	943.543	292.58		1.209	1134.83	471.353		-0.465	808.792	185.23
-7.533	512.533	110.788		-1.488	819.288	180.767		1.302	939.362	290.869		1.302	1130.43	465.855		-0.372	811.171	185.735
-7.44	519.157	111.794		-1.395	824.023	181.837		1.395	934.88	289.482		1.395	1124.97	461.116		-0.279	813.132	186.597
-7.347	527.147	113.228		-1.302	828.353	182.735		1.488	929.788	288.032		1.488	1119.91	456.932		-0.186	814.377	187.465
-7.254	533.929	114.461		-1.209	831.872	183.295		1.581	924.568	286.476		1.581	1115.21	452.622		-0.093	814.656	187.93
-7.161	540.876	115.874		-1.116	835.163	183.815		1.674	919.735	284.036		1.674	1110.53	447.302		0	815.365	188.812
-7.068	547.541	117.59		-1.023	838.255	184.492		1.767	916.135	282.782		1.767	1113.13	442.937		0.093	815.114	189.945
-6.975	554.631	118.368		-0.93	836.737	186.922		1.86	909.153	282.49		1.86	1080.09	458.195		0.186	814.117	190.245
-6.882	561.645	120.269		-0.837	838.806	187.97		1.953	902.966	281.103		1.953	1077.33	454.338		0.279	812.614	190.665
-6.789	568.855	121.227		-0.744	840.721	189.088		2.046	897.14	279.24		2.046	1074.56	450.725		0.372	810.501	190.847
-6.696	576.15	122.444		-0.651	842.348	189.778		2.139	890.909	277.694		2.139	1071.21	448		0.465	808.224	191.162
-6.603	583.197	123.526		-0.558	843.992	190.47		2.232	884.819	276.235		2.232	1067.26	443.638		0.558	805.424	191.343
-6.51	590.674	124.448		-0.465	844.93	190.351		2.325	878.812	274.775		2.325	1063.15	440.56		0.651	802.479	191.135
-6.417	598.331	125.636		-0.372	845.642	189.913		2.418	872.564	273.075		2.418	1060.13	436.068		0.744	799.217	190.693
-6.324	605.924	127.067		-0.279	845.851	189.906		2.511	866.014	272.138		2.511	1056.4	431.529		0.837	795.029	190.656
-6.231	613.695	128.019		-0.186	845.525	189.985		2.604	860.12	269.877		2.604	1064.24	427.403		0.93	791.726	190.018
-6.138	621.216	129.804		-0.093	844.834	190.099		2.697	849.664	271.904		2.697	1027.99	445.113		1.023	787.156	189.66
-6.045	628.043	131.307		0	846.405	189.24		2.79	843.08	270.398		2.79	1023.84	436.84		1.116	782.183	188.94
-5.952	634.608	132.992		0.093	845.499	189.758		2.883	834.994	267.938		2.883	1019.26	429.566		1.209	776.763	188.152
-5.859	641.199	134.435		0.186	844.147	190.339		2.976	826.292	266.108		2.976	1014.06	422.54		1.302	771.291	187.251
-5.766	647.72	136.014		0.279	842.2	190.5		3.069	818.5	264.225		3.069	1008.77	415.872		1.395	765.447	186.378
-5.673	654.432	137.776		0.372	840.052	190.903		3.162	810.691	262.72		3.162	1003.12	409.74		1.488	759.173	184.994
-5.58	661.024	141.137		0.465	838.087	191.545		3.255	803.307	261.127		3.255	997.035	405.796		1.581	753.608	183.845
-5.487	667.155	143.318		0.558	835.777	191.959		3.348	794.736	256.625		3.348	989.092	397.35		1.674	749.218	180.74
-5.394	673.06	145.663		0.651	833.361	191.755		3.441	788.193	255.035		3.441	989.235	391.641		1.767	742.634	179.06
-5.301	673.592	156.886		0.744	815.077	211.467		3.534	779.348	254.019		3.534	964.66	403.729		1.86	736.107	177.763
-5.208	679.603	158.556		0.837	812.884	210.663		3.627	770.461	253.387		3.627	959.942	397.047		1.953	729.497	176.162
-5.115	685.311	159.852		0.93	810.308	209.372		3.72	762.841	252.248		3.72	958.183	393.518		2.046	722.808	174.54
-5.022	691.014	161.329		1.023	807.48	207.863		3.813	753.871	250.694		3.813	953.29	387.498		2.139	715.681	172.979
-4.929	696.583	162.783		1.116	804.7	206.329		3.906	744.826	249.692		3.906	948.305	383.267		2.232	708.36	171.456
-4.836	702.115	164.443		1.209	801.964	205.04		3.999	736.744	248.144		3.999	942.172	377.884		2.325	700.946	170.404
-4.743	707.282	166.253		1.302	799.208	203.758		4.092	727.393	246.842		4.092	934.673	372.597		2.418	692.671	168.645
-4.65	710.24	167.184		1.395	796.184	201.835		4.185	721.093	245.681		4.185	933.164	367.711		2.511	684.522	167.425
-4.557	715.69	169.101		1.488	792.981	199.791		4.278	712.878	244.865		4.278	925.407	362.806		2.604	676.683	165.771
-4.464	724.66	173.589		1.581	776.062	216.905		4.371	703.277	245.524		4.371	899.133	372.644		2.697	667.229	163.385
-4.371	730.281	175.206		1.674	773.005	215.082		4.464	695.147	244.492		4.464	889.393	365.934		2.79	659.17	162.277
-4.278	736.673	180.796		1.767	770.184	213.367		4.557	685.667	243.504		4.557	883.974	363.536		2.883	650.944	161.05
-4.185	742.536	183.208		1.86	767.237	211.482		4.65	678.338	241.796		4.65	881.405	361.059		2.976	642.608	159.624
-4.092	748.27	184.666		1.953	764.351	209.824		4.743	670.242	240.111		4.743	874.604	356.846		3.069	634.04	158.117
-3.999	753.544	186.089		2.046	761.691	208.966		4.836	662.352	238.75		4.836	867.503	353.457		3.162	625.395	156.592
-3.906	758.652	187.599		2.139	758.785	207.028		4.929	654.578	237.317		4.929	861.819	350.359		3.255	616.494	155.022
-3.813	763.679	190.09		2.232	755.488	204.973		5.022	647.684	236.294		5.022	855.256	347.651		3.348	607.596	153.75
-3.72	767.605	192.52		2.325	751.95	203.038		5.115	640.492	235.02		5.115	849.877	346.666		3.441	596.976	149.165
-3.627	768.745	196.837		2.418	748.085	202.046		5.208	632.018	233.786		5.208	842.888	343.847		3.534	588.118	148.347
-3.534	773.581	198.297		2.511	744.677	199.747		5.301	623.614	233.04		5.301	837.08	341.353		3.627	579.169	147.769
-3.441	778.457	200.233		2.604	741.14	197.591		5.394	614.791	232.463		5.394	831.032	337.676		3.72	571.43	146.334
-3.348	782.076	201.051		2.697	737.095	195.346		5.487	604	223.795		5.487	821.149	327.514		3.813	563.078	145.889
-3.255	787.341	204.018		2.79	733.116	194.172		5.58	592.918	220.976		5.58	814.272	322.859		3.906	554.83	144.829
-3.162	791.202	205.436		2.883	728.688	192.534		5.673	583.624	218.712		5.673	807.91	317.182		3.999	546.173	143.191
-3.069	795.154	206.956		2.976	724.054	191.088		5.766	574.883	216.774		5.766	801.787	312.788		4.092	538.263	141.738
-2.976	799.219	208.652		3.069	719.635	189.235		5.859	566.731	215.296		5.859	795.703	308.359		4.185	530.397	140.302
-2.883	803.097	210.407		3.162	715.201	188.032		5.952	558.378	213.471		5.952	791.477	302.254		4.278	521.756	138.958
-2.79	814.809	218.608		3.255	710.139	187.56		6.045	552.846	209.947		6.045	787.921	296.176		4.371	514.411	138.394
-2.697	818.117	219.934		3.348	705.741	186.725		6.138	544.122	208.211		6.138	780.567	291.699		4.464	505.694	137.514
-2.604	821.365	221.359		3.441	701.274	186.293		6.231	535.364	206.327		6.231	774.087	287.102		4.557	496.394	136.462
-2.511	824.178	222.471		3.534	696.92	186.071		6.324	525.559	202.344		6.324	768.05	282.527		4.65	488.387	134.631
-2.418	826.163	222.355		3.627	692.311	186.773		6.417	517.927	201.491		6.417	762.951	278.424		4.743	479.554	133.62
-2.325	830.529	221.851		3.72	691.462	185.426		6.51	510.215	200.728		6.51	757.539	271.81		4.836	471.062	132.659
-2.232	832.462	221.679		3.813	687.135	185.032		6.603	501.786	199.183		6.603	750.771	268.697		4.929	462.32	131.184
-2.139	834.721	222.629		3.906	683.831	184.935		6.696	493.844	197.98		6.696	745.064	265.761		5.022	453.597	129.286
-2.046	836.337	222.625		3.999	679.725	183.958		6.789	485.073	195.872		6.789	739.889	262.112		5.115	445.847	127.349
-1.953	837.476	222.784		4.092	672.827	185.512		6.882	479.258	192.659		6.882	734.349	260.196		5.208	437.679	125.63
-1.86	838.724	222.929		4.185	668.345	185.747		6.975	471.108	191.756		6.975	727.077	258.001		5.301	429.468	123.996
-1.767	839.747	223.222		4.278	664.103	184.672		7.068	462.545	190.324		7.068	720.241	255.508		5.394	421.805	122.706
-1.674	840.786	223.44		4.371	659.697	183.124		7.161	454.624	189.593		7.161	714.967	254.17		5.487	414.862	121.254
-1.581	842.073	223.828		4.464	654.959	181.486		7.254	447.214	188.874		7.254	708.245	252.711		5.58	408.452	120.524
-1.488	843.39	224.355		4.557	651.241	180.011		7.347	439.305	186.692		7.347	702.544	250.259		5.673	402.325	119.104
-1.395	844.241	225.393		4.65	645.455	177.917		7.44	433.102	185.642		7.44	696.354	248.794		5.766	396.09	117.749
-1.302	844.982	226.502		4.743	639.967	175.925		7.533	424.625	184.945		7.533	687.833	247.605		5.859	388.571	116.773
-1.209	849.076	228.367		4.836	636.444	173.231		7.626	421.18	182.513		7.626	678.984	246.087		5.952	383.176	114.861
-1.116	839.792	241.066		4.929	623.474	180.873		7.719	414.076	182.814		7.719	677.008	243.931		6.045	375.442	114.904
-1.023	841.146	242.009		5.022	616.908	179.4		7.812	405.977	182.252		7.812	667.386	241.449		6.138	368.365	114.434
-0.93	842.334	243.117		5.115	607.805	172.854		7.905	399.855	182.613		7.905	657.61	241.439		6.231	361.591	113.427
-0.837	843.913	244.067		5.208	603.037	171.623		7.998	393.516	182.365		7.998	648.534	242.425		6.324	354.167	112.39
-0.744	845.106	245.22		5.301	594.61	166.594		8.091	387.716	182.167		8.091	634.724	234.785		6.417	347.674	111.842
-0.651	845.938	246.252		5.394	589.796	165.212		8.184	380.939	182.417		8.184	629.216	233.404		6.51	342.274	110.083
-0.558	847.783	248.121		5.487	584.66	164.226		8.277	377.44	181.053		8.277	622.44	234.112		6.603	334.188	109.222
-0.465	848.194	250.04		5.58	580.573	163.287		8.37	371.536	177.252		8.37	613.462	235.714		6.696	326.487	106.732
-0.372	849.339	251.978		5.673	576.513	162.589		8.463	365.003	175.747		8.463	604.855	235.333		6.789	319.807	104.439
-0.279	850.243	252.851		5.766	567.68	169.922		8.556	367.124	172.028		8.556	603.406	231.93		6.882	312.816	103.392
-0.186	851.137	253.923		5.859	565.387	169.544		8.649	362.702	170.152		8.649	596.374	232.153		6.975	306.502	101.112
-0.093	851.305	254.905		5.952	561.815	168.35		8.742	354.733	168.611		8.742	588.747	231.526		7.068	298.495	99.4847
0	851.377	255.924		6.045	558.047	167.339		8.835	348.888	167.302		8.835	582.757	232.381		7.161	294.046	97.2007
0.093	850.927	256.967		6.138	553.828	166.369		8.928	342.711	166.303		8.928	576.172	233.656		7.254	286.735	95.8441
0.186	850.707	257.74		6.231	550.158	165.5		9.021	338.075	165.379		9.021	568.538	234.225		7.347	284.236	90.8038
0.279	850.583	258.361		6.324	546.813	164.941		9.114	340.747	162.94		9.114	562.823	233.345		7.44	278.034	87.9138
0.372	846.446	257.942		6.417	542.137	164.022		9.207	333.438	161.653		9.207	554.954	233.149		7.533	270.723	86.0658
0.465	848.938	259.176		6.51	537.145	162.636		9.3	337.617	161.461		9.3	550.827	231.562		7.626	265.743	85.1632
0.558	848.239	258.799		6.603	529.49	164.038		9.393	332.245	161.122		9.393	542.947	229.029		7.719	258.999	86.2204
0.651	847.499	258.422		6.696	524.5	162.615		9.486	326.732	160.642		9.486	535.511	226.534		7.812	256.865	85.1653
0.744	846.856	258.211		6.789	519.365	161.15		9.579	327.592	159.548		9.579	526.88	223.711		7.905	256.139	83.7028
0.837	846.522	257.763		6.882	514.073	159.791		9.672	320.174	159.156		9.672	518.556	220.965		7.998	249.795	83.3961
0.93	846.187	257.42		6.975	508.6	159.245		9.765	316.925	158.105		9.765	512.989	218.758		8.091	243.849	83.4661
1.023	845.792	256.522		7.068	502.144	157.843		9.858	315.437	156.663		9.858	504.338	215.919		8.184	240.395	82.3656
1.116	844.913	255.498		7.161	498.1	157.334		9.951	311.328	156.185		9.951	495.793	213.085		8.277	234.816	82.4299
1.209	843.553	254.634		7.254	493.681	156.44		10.044	320.669	153.546		10.044	501.105	206.514		8.37	236.68	78.2905
1.302	843.044	252.265		7.347	491.355	154.934		10.137	314.274	152.904		10.137	495.294	202.76		8.463	230.968	77.6496
1.395	841.205	251.034		7.44	483.062	157.104		10.23	309.071	143.454		10.23	488.851	205.143		8.556	226.892	76.9109
1.488	839.314	250.057		7.533	479.52	156.328		10.323	303.336	143.285		10.323	481.197	204.125		8.649	221.727	75.6082
1.581	837.415	249.262		7.626	475.856	155.607		10.416	297.612	142.924		10.416	474.188	203.845		8.742	218.935	73.1702
1.674	835.089	248.54		7.719	471.731	155.481		10.509	296.413	141.754		10.509	470.254	203.697		8.835	212.059	71.3673
1.767	832.626	247.913		7.812	468.769	155.624		10.602	290.182	141.396		10.602	464.615	202.668		8.928	206.576	69.7514
1.86	830.256	247.165		7.905	465.275	154.951		10.695	289.37	140.588		10.695	457.718	202.158		9.021	202.339	66.7384
1.953	829.514	247.638		7.998	463.187	154.21		10.788	285.008	140.871		10.788	453.178	200.685		9.114	197.424	65.6441
2.046	827.347	247.542		8.091	463.054	152.598		10.881	282.477	141.54		10.881	452.428	198.021		9.207	193.94	64.0876
2.139	814.744	243.802		8.184	465.554	146.469		10.974	286.529	142.159		10.974	472.42	184.785		9.3	188.518	62.6498
2.232	815.864	244.706		8.277	461.627	145.901		11.067	279.726	142.859		11.067	466.906	184.516		9.393	182.425	62.4724
2.325	814.267	245.369		8.37	457.415	144.739		11.16	262.885	100.998		11.16	455.491	182.718		9.486	177.121	60.3572
2.418	812.176	247.375		8.463	453.544	143.785		11.253	259.414	101.587		11.253	450.63	181.847		9.579	176.017	62.3443
2.511	810.075	247.944		8.556	449.606	143.055		11.346	252.434	101.006		11.346	443.112	182.078		9.672	170.09	61.8172
2.604	808.404	248.486		8.649	446.115	143.998		11.439	257.314	96.7471		11.439	435.78	182.135		9.765	166.828	62.7288
2.697	806.608	249.167		8.742	442.289	143.767		11.532	252.477	95.6451		11.532	428.371	182.407		9.858	163.878	62.3273
2.79	806.845	250.571		8.835	438.401	143.659		11.625	249.947	93.996		11.625	426.308	182.198		9.951	162.639	62.0356
2.883	804.937	252.003		8.928	442.647	137.312		11.718	248.645	92.211		11.718	423.619	179.485		10.044	159.515	65.5139
2.976	803.504	252.85		9.021	439.117	136.85		11.811	241.875	91.7813		11.811	415.969	179.892		10.137	153.992	65.0478
3.069	801.996	253.799		9.114	436.098	137.334		11.904	239.064	87.8297		11.904	405.661	177.685		10.23	159.905	69.7554
3.162	800.313	254.512		9.207	432.65	137.491		11.997	233.466	87.6766		11.997	397.791	177.255		10.323	156.474	74.4518
3.255	798.192	253.873		9.3	431.999	135.112		12.09	229.732	80.2883		12.09	380.73	168.453		10.416	133.73	27.0779
3.348	796.419	253.09		9.393	427.999	135.363		12.183	232.707	75.2602		12.183	373.798	166.386		10.509	127.465	31.9931
3.441	794.7	252.491		9.486	424.263	135.546		12.276	229.136	74.0575		12.276	366.414	163.992		10.602	123.011	29.7679
3.534	792.713	251.983		9.579	420.217	135.403		12.369	227.416	72.5802		12.369	363.826	159.363
3.627	790.704	251.404		9.672	415.678	134.812		12.462	221.33	72.3696		12.462	359.319	155.464
3.72	788.71	250.855		9.765	411.52	134.203		12.555	217.345	70.9691		12.555	354.292	153.024
3.813	784.347	249.8		9.858	415.214	128.108		12.648	217.577	67.0862		12.648	350.415	148.654
3.906	781.399	247.607		9.951	410.984	127.939		12.741	211.583	67.3496		12.741	343.734	146.522
3.999	778.2	248.228		10.044	406.834	127.643		12.834	208.473	66.6571		12.834	342.669	142.029
4.092	769.057	251.567		10.137	402.545	127.01		12.927	202.38	66.9231		12.927	336.052	140.376
4.185	766.598	251.321		10.23	398.412	126.126		13.02	198.34	68.619		13.02	326.158	133.359
4.278	764.129	251.098		10.323	395.26	126.828		13.113	198.41	70.3012		13.113	321.334	132.879
4.371	761.657	250.849		10.416	390.906	126.294		13.206	194.461	70.0939		13.206	314.765	132.205
4.464	759.187	250.725		10.509	388.861	124.494		13.299	195.317	67.9502		13.299	316.98	127.309
4.557	751.765	247.602		10.602	384.587	123.96		13.392	189.892	67.5329		13.392	312.63	125.443
4.65	749.348	247.453		10.695	384.194	121.791		13.485	186.418	67.07		13.485	295.777	117.684
4.743	746.942	247.58		10.788	378.916	120.699		13.578	180.013	67.5078		13.578	290.775	116.074
4.836	744.235	247.535		10.881	374.642	120.321		13.671	174.58	67.5613		13.671	283.504	115.858
4.929	741.88	247.378		10.974	370.469	119.819		13.764	163.934	60.7518		13.764	265.534	103.579
5.022	739.426	245.848		11.067	368.765	118.156		13.857	158.61	61.6403		13.857	258.646	103.046
5.115	737.145	244.478		11.16	365.305	115.978		13.95	153.32	64.7748		13.95	247.305	101.945
5.208	734.665	243.177		11.253	361.945	116.446		14.043	145.114	69.3903		14.043	243.173	102.498
5.301	732.163	241.978		11.346	358.696	116.886		14.136	142.802	78.6243		14.136	236.74	102.262
5.394	729.534	242.196		11.439	357.218	116.875						14.229	232.23	101.478
5.487	727.273	241.208		11.532	354.25	117.802						14.322	225.652	101.569
5.58	729.138	239.254		11.625	351.07	118.636						14.415	223.464	101.641
5.673	727.023	238.54		11.718	350.716	119.163						14.508	218.875	102.943
5.766	725.036	237.979		11.811	347.402	120.387						14.601	212.532	103.376
5.859	722.731	237.573		11.904	345.368	121.773						14.694	200.603	105.148
5.952	720.522	236.8		11.997	341.74	123.267						14.787	193.978	105.818
6.045	721.181	235.452		12.09	347.34	121.616						14.88	158.833	70.4068
6.138	716.821	235.462		12.183	346.75	122.215						14.973	162.223	74.2889
6.231	714.613	234.907		12.276	342.439	123.565						15.066	156.156	75.4543
6.324	715.387	234.055		12.369	351.248	118.694						15.159	139.424	36.6986
6.417	700.019	245.503		12.462	346.357	119.47						15.252	132.051	37.6411
6.51	697.586	244.747		12.555	346.057	119.088
6.603	694.658	243.607		12.648	347.132	117.089
6.696	691.739	242.596		12.741	342.707	117.68
6.789	688.748	241.585		12.834	343.926	117.072
6.882	686.124	241.124		12.927	343.14	115.069
6.975	685.906	240.729		13.02	342.186	111.877
7.068	684.816	240.944		13.113	346.412	108.294
7.161	681.927	240.045		13.206	342.596	107.509
7.254	680.73	238.41		13.299	341.17	106.525
7.347	677.898	237.824		13.392	338.012	105.824
7.44	674.792	237.501		13.485	334.615	105.127
7.533	671.841	237.213		13.578	331.354	104.55
7.626	669.056	237.15		13.671	328.094	104.029
7.719	666.476	237.269		13.764	330.675	100.096
7.812	663.531	237.259		13.857	326.808	100.075
7.905	652.616	225.567		13.95	324.532	99.9658
7.998	649.57	224.944		14.043	321.943	99.9987
8.091	646.719	224.587		14.136	317.709	99.891
8.184	644.242	222.786		14.229	316.601	97.7625
8.277	641.51	222.429		14.322	311.904	97.7319
8.37	641.646	222.278		14.415	309.482	97.5423
8.463	643.429	221.023		14.508	306.35	97.8643
8.556	641.393	220.729		14.601	301.845	97.6166
8.649	639.345	220.392		14.694	302.48	96.013
8.742	638.123	220.461		14.787	298.484	95.3548
8.835	638.06	227.16		14.88	294.638	96.0574
8.928	636.312	225.663		14.973	290.776	95.8198
9.021	634.512	224.323		15.066	286.868	95.5462
9.114	632.819	223.083		15.159	283.12	95.1446
9.207	631.092	221.917		15.252	280.627	95.7803
9.3	629.149	220.702		15.345	279.959	94.9226
9.393	626.833	219.065		15.438	283.803	91.5288
9.486	624.679	217.586		15.531	279.637	92.766
9.579	622.575	216.203		15.624	281.953	91.6644
9.672	626.994	214.176		15.717	278.784	91.8209
9.765	624.873	212.221		15.81	276.113	83.179
9.858	622.619	210.383		15.903	272.941	82.8721
9.951	620.243	208.465		15.996	270.079	82.8789
10.044	617.871	206.73		16.089	267.133	82.9781
10.137	615.689	204.668		16.182	266.96	82.2721
10.23	613.141	202.962		16.275	267.51	80.5071
10.323	610.858	201.807		16.368	263.783	80.2683
10.416	608.527	200.825		16.461	260.143	79.7661
10.509	605.966	199.876		16.554	274.631	67.3442
10.602	603.374	200.176		16.647	271.373	66.8116
10.695	595.483	186.444		16.74	273.515	65.0178
10.788	593.686	183.976		16.833	270.455	65.1258
10.881	591.154	182.809		16.926	267.505	66.054
10.974	587.479	182.68		17.019	264.202	66.0152
11.067	584.564	181.582		17.112	260.766	66.1838
11.16	582.429	180.048		17.205	262.551	62.3369
11.253	579.958	177.83		17.298	264.228	59.4655
11.346	577.295	175.654		17.391	261.058	60.4046
11.439	574.692	173.756		17.484	257.193	61.5244
11.532	572.035	172.062		17.577	253.768	62.0326
11.625	570.548	171.476		17.67	252.123	63.2371
11.718	567.492	171.424		17.763	247.999	63.0911
11.811	564.809	170.399		17.856	244.175	63.0609
11.904	566.061	170.148		17.949	237.142	62.0554
11.997	563.871	169.298		18.042	232.56	60.8181
12.09	561.412	168.713		18.135	232.222	57.8419
12.183	559.028	168.533		18.228	227.256	55.9557
12.276	556.928	168.588		18.321	222.208	54.176
12.369	553.804	168.013		18.414	217.301	52.4282
12.462	552.091	167.213		18.507	212.039	51.0107
12.555	552.464	166.668		18.6	208.17	50.5842
12.648	551.05	165.818		18.693	208.669	45.9689
12.741	549.803	165.235		18.786	204.106	45.4694
12.834	548.521	164.768		18.879	199.654	45.0615
12.927	546.742	164.456		18.972	198.062	44.6385
13.02	543.269	164.794		19.065	193.889	44.5461
13.113	541.837	165.811		19.158	189.933	44.8544
13.206	539.948	165.637		19.251	186.006	45.3302
13.299	539.9	165.2		19.344	187.266	46.1507
13.392	534.459	163.843		19.437	196.877	41.5811
13.485	532.292	163.745		19.53	197.104	42.042
13.578	530.097	163.49		19.623	187.923	38.6504
13.671	527.639	163.107		19.716	188.153	42.2723
13.764	525.075	162.856		19.809	NaN	23.1935
13.857	520.868	163.046		19.902	NaN	24.3504
13.95	518.156	164.122		19.995	NaN	25.5437
14.043	512.625	159.403		20.088	NaN	22.5942
14.136	510.328	159.42		20.181	NaN	22.5696
14.229	510.878	159.784		20.274	NaN	22.5454
14.322	508.063	159.871		20.367	NaN	22.5216
14.415	506.012	158.276		20.46	NaN	22.4982
14.508	503.798	156.941		20.553	NaN	22.4752
14.601	501.914	155.738		20.646	NaN	22.4527
14.694	500.195	154.703		20.739	NaN	22.4305
14.787	499.55	154.687		20.832	NaN	21.4008
14.88	497.719	153.681		20.925	NaN	20.4429
14.973	496.004	152.813		21.018	NaN	20.6366
15.066	494.284	151.999		21.111	NaN	20.1804
15.159	489.457	149.731		21.204	NaN	19.726
15.252	487.596	148.341		21.297	NaN	19.2736
15.345	486.721	148.233		21.39	NaN	18.8232
15.438	485.459	148.876		21.483	NaN	18.3751
15.531	483.941	149.477		21.576	NaN	17.9295
15.624	476.473	156.625		21.669	NaN	17.4865
15.717	475.08	157.137		21.762	NaN	19.1197
15.81	473.654	157.767		21.855	NaN	18.7395
15.903	472.302	158.408
15.996	471.192	159.087
16.089	470.056	160.003
16.182	468.907	161.213
16.275	466.431	161.974
16.368	464.335	161.538
16.461	465.188	161.686
16.554	462.953	161.206
16.647	460.533	160.619
16.74	457.962	159.943
16.833	456.14	158.318
16.926	453.209	157.803
17.019	450.373	157.175
17.112	447.677	156.183
17.205	441.716	153.183
17.298	439.384	153.016
17.391	437.391	151.786
17.484	435.837	150.893
17.577	434.254	150.258
17.67	432.774	149.657
17.763	431.015	149.127
17.856	429.486	148.658
17.949	427.881	148.343
18.042	422.691	146.563
18.135	420.955	145.71
18.228	418.943	144.742
18.321	416.097	144.853
18.414	413.967	143.927
18.507	412.132	142.849
18.6	410.122	142.056
18.693	408.303	141.25
18.786	406.451	140.509
18.879	408.86	139.409
18.972	398.607	129.736
19.065	395.955	129.035
19.158	393.327	128.471
19.251	390.57	128.016
19.344	387.478	127.523
19.437	384.158	127.351
19.53	381.033	126.98
19.623	377.77	126.376
19.716	374.346	125.954
19.809	370.801	125.8
19.902	367.334	125.591
19.995	364.92	125.04
20.088	359.856	123.666
20.181	357.634	123.277
20.274	355.803	122.986
20.367	353.764	122.76
20.46	351.54	122.788
20.553	350.934	122.586
20.646	349.027	122.59
20.739	347.165	122.554
20.832	345.343	122.359
20.925	343.144	122.03
21.018	340.882	121.91
21.111	338.663	121.864
21.204	336.676	121.883
21.297	335.061	121.767
21.39	337.006	119.845
21.483	335.754	119.697
21.576	334.499	119.686
21.669	333.322	119.678
21.762	331.339	120.71
21.855	322.987	111.012
21.948	321.435	111.162
22.041	319.809	111.432
22.134	317.989	111.752
22.227	316.171	112.005
22.32	314.223	112.129
22.413	309.614	112.639
22.506	307.195	112.349
22.599	304.758	112.115
22.692	302.235	111.999
22.785	299.531	110.556
22.878	296.808	108.967
22.971	294.232	107.438
23.064	291.597	106.094
23.157	288.707	104.996
23.25	285.93	104.162
23.343	283.045	103.491
23.436	280.422	102.948
23.529	277.895	102.456
23.622	275.441	102.006
23.715	270.721	99.4302
23.808	269.323	100.493
23.901	267.759	101.626
23.994	266.038	102.471
24.087	264.507	103.311
24.18	262.986	104.197
24.273	261.622	104.979
24.366	259.925	105.765
24.459	258.173	106.702
24.552	256.446	107.676
24.645	253.817	107.508
24.738	251.2	107.422
24.831	248.771	107.373
24.924	246.684	107.487
25.017	244.749	107.512
25.11	242.76	107.641
25.203	240.631	107.951
25.296	238.858	108.196
25.389	237.122	108.466
25.482	235.415	108.818
25.575	234.172	109.313
25.668	234.749	110.4
25.761	233.261	110.977
25.854	231.428	111.416
25.947	229.385	111.847
26.04	227.492	112.414
26.133	225.955	112.85
26.226	224.16	113.462
26.319	226.085	112.38
26.412	227.858	111.648
26.505	227.809	111.546
26.598	225.807	111.186
26.691	223.987	110.843
26.784	222.399	110.614
26.877	223.884	111.983
26.97	222.073	111.44
27.063	220.039	111.031
27.156	221.086	110.11
27.249	219.057	109.705
27.342	216.926	109.413
27.435	215.889	109.476
27.528	214.955	109.603
27.621	214.081	109.798
27.714	216.853	108.54
27.807	216.127	108.876
27.9	215.535	109.525
27.993	217.482	110.25
28.086	216.844	111.004
28.179	222.948	110.491
28.272	222.608	111.157
28.365	224.71	110.93
28.458	222.349	112.56
28.551	220.843	112.902
28.644	219.28	113.329
28.737	217.578	113.676
28.83	215.838	114.009
28.923	214.199	114.1
29.016	212.56	114.231
29.109	211.008	114.314
29.202	209.325	114.525
29.295	207.673	113.613
29.388	206.021	112.766
29.481	204.204	111.962
29.574	202.571	111.263
29.667	200.87	110.893
29.76	195.59	109.957
29.853	196.47	110.396
29.946	194.889	110.519
30.039	193.315	110.732
30.132	191.789	111.007
30.225	182.357	97.9226
30.318	181.567	100.509
30.411	180.379	101.601
30.504	179.03	102.51
30.597	175.559	103.547
30.69	173.742	103.043
30.783	171.94	102.562
30.876	173.351	102.363
30.969	174.184	102.761
31.062	172.076	102.503
31.155	170.107	102.203
31.248	168.139	101.943
31.341	166.171	101.724
31.434	163.077	100.481
31.527	154.16	89.2221
31.62	146.656	88.0169
31.713	148.736	89.155
31.806	147.207	89.8673
31.899	145.678	90.6197
31.992	151.366	93.213

## Sheet: Speeds
WT				WT				WT				WT				WT
Protoplasts				Protoplasts				Protoplasts				Protoplasts				Walled cells
steady state in 1.2M sorbitol				steady state in 0.8M sorbitol				steady state in 0.4M sorbitol				steady state in 0.25M sorbitol				steady state in 0M sorbitol
Speed (um/s)				Speed (um/s)				Speed (um/s)				Speed (um/s)				Speed (um/s)
time	mean	stdev		time	mean	stdev		time	mean	stdev		time	mean	stdev		time	mean	stdev
-15.438	0.0516429	0.0300979		-9.393	0.0671764	0.0529008		-6.603	0.0775407	0.110649		-6.603	0.250573	0.132965		-7.719	0.047942	0.0122258
-15.345	0.0606122	0.0428211		-9.3	0.0645827	0.0490682		-6.51	0.0759671	0.102567		-6.51	0.24239	0.126168		-7.626	0.048836	0.0138881
-15.252	0.06101	0.0409797		-9.207	0.0617073	0.0457422		-6.417	0.0743936	0.0950401		-6.417	0.234207	0.120263		-7.533	0.0530083	0.0177117
-15.159	0.0614078	0.0394738		-9.114	0.0620867	0.0416361		-6.324	0.0727164	0.0882292		-6.324	0.205341	0.108966		-7.44	0.0750257	0.0553535
-15.066	0.0618056	0.0383429		-9.021	0.0599025	0.0392077		-6.231	0.0666106	0.0756977		-6.231	0.19787	0.105441		-7.347	0.0842903	0.0648843
-14.973	0.0622033	0.0376209		-8.928	0.0581	0.0369295		-6.138	0.0631495	0.0676425		-6.138	0.190399	0.102974		-7.254	0.0782738	0.0599158
-14.88	0.0636744	0.0359837		-8.835	0.0562975	0.0354423		-6.045	0.0658073	0.0652241		-6.045	0.170027	0.104549		-7.161	0.0744318	0.0555361
-14.787	0.0651456	0.0348583		-8.742	0.0541085	0.0334357		-5.952	0.0649114	0.0621917		-5.952	0.156572	0.101444		-7.068	0.07176	0.0521371
-14.694	0.0666167	0.0342951		-8.649	0.0515769	0.0307025		-5.859	0.0611492	0.0570205		-5.859	0.159879	0.113205		-6.975	0.0670078	0.0473614
-14.601	0.0680878	0.0343217		-8.556	0.056706	0.0338986		-5.766	0.0615033	0.0556817		-5.766	0.138964	0.105838		-6.882	0.062494	0.0441078
-14.508	0.0722114	0.0458303		-8.463	0.0557421	0.0433861		-5.673	0.0530246	0.047555		-5.673	0.0943935	0.077254		-6.789	0.0588638	0.0418184
-14.415	0.0776931	0.0497761		-8.37	0.0563488	0.0407277		-5.58	0.0524842	0.0434492		-5.58	0.0896309	0.0725187		-6.696	0.0556947	0.0385652
-14.322	0.079205	0.050747		-8.277	0.0565957	0.0384539		-5.487	0.051337	0.0400636		-5.487	0.08529	0.0684374		-6.603	0.0550957	0.0398913
-14.229	0.0807982	0.0521817		-8.184	0.0564169	0.037206		-5.394	0.0504806	0.0375931		-5.394	0.0804974	0.0648169		-6.51	0.052738	0.0355377
-14.136	0.0802626	0.0544762		-8.091	0.0568795	0.0353947		-5.301	0.0514665	0.0458291		-5.301	0.0756824	0.0609625		-6.417	0.0497694	0.0327315
-14.043	0.0853156	0.0620621		-7.998	0.0582364	0.0372932		-5.208	0.0502051	0.0433714		-5.208	0.0699281	0.0577249		-6.324	0.0507388	0.035408
-13.95	0.0857743	0.0649206		-7.905	0.0573539	0.0361447		-5.115	0.0493401	0.0413489		-5.115	0.0657936	0.0547755		-6.231	0.048301	0.0322924
-13.857	0.0862338	0.0693495		-7.812	0.057258	0.0357845		-5.022	0.0479607	0.0405404		-5.022	0.0626043	0.051541		-6.138	0.0476013	0.0304018
-13.764	0.0863145	0.0734258		-7.719	0.0573637	0.0363628		-4.929	0.0466475	0.0398512		-4.929	0.0626378	0.0577108		-6.045	0.0463039	0.0285514
-13.671	0.0838312	0.0767404		-7.626	0.0555169	0.0356238		-4.836	0.0444888	0.0394896		-4.836	0.0581533	0.0523886		-5.952	0.0452424	0.0270448
-13.578	0.0810487	0.0798103		-7.533	0.0539714	0.034922		-4.743	0.0443054	0.0406282		-4.743	0.0576102	0.0540179		-5.859	0.0439015	0.0265127
-13.485	0.0776351	0.0751829		-7.44	0.0516157	0.0330283		-4.65	0.0446938	0.0426768		-4.65	0.0559485	0.0479192		-5.766	0.044739	0.0267029
-13.392	0.0752953	0.070457		-7.347	0.0484164	0.0311416		-4.557	0.0445507	0.0412426		-4.557	0.0544501	0.0434682		-5.673	0.0450528	0.0308739
-13.299	0.0729804	0.0670704		-7.254	0.0467886	0.0295253		-4.464	0.0435721	0.0392587		-4.464	0.0537742	0.0399349		-5.58	0.0450491	0.0305655
-13.206	0.0720728	0.062868		-7.161	0.0466017	0.0302981		-4.371	0.0422572	0.0360921		-4.371	0.0525149	0.0387283		-5.487	0.0461577	0.0327885
-13.113	0.0707398	0.0597493		-7.068	0.0446022	0.0283202		-4.278	0.0419294	0.0352082		-4.278	0.0511121	0.036164		-5.394	0.0460279	0.0326634
-13.02	0.0687378	0.0576212		-6.975	0.0433124	0.027277		-4.185	0.0423776	0.0371376		-4.185	0.0504457	0.0349797		-5.301	0.0466232	0.0372446
-12.927	0.0670126	0.0550628		-6.882	0.0417509	0.0263049		-4.092	0.0422285	0.0368366		-4.092	0.0487831	0.0339253		-5.208	0.0455899	0.0364701
-12.834	0.0658318	0.0524546		-6.789	0.0402145	0.0256361		-3.999	0.0412093	0.0351159		-3.999	0.0483792	0.0353089		-5.115	0.0441846	0.0366222
-12.741	0.0652615	0.051294		-6.696	0.0388176	0.0255418		-3.906	0.0403406	0.0339483		-3.906	0.0483938	0.0373537		-5.022	0.0433712	0.0373643
-12.648	0.0648475	0.0500206		-6.603	0.0395029	0.0254241		-3.813	0.039954	0.0369675		-3.813	0.0476842	0.0379976		-4.929	0.0424618	0.036444
-12.555	0.0646325	0.0487314		-6.51	0.0389682	0.0238299		-3.72	0.0390916	0.0349242		-3.72	0.0475529	0.0363507		-4.836	0.0400786	0.0330385
-12.462	0.0634405	0.0472217		-6.417	0.0386009	0.0229421		-3.627	0.0397185	0.0389042		-3.627	0.0466688	0.0351355		-4.743	0.0385996	0.030568
-12.369	0.0625456	0.0456532		-6.324	0.0401998	0.0235982		-3.534	0.0391798	0.0369352		-3.534	0.0462089	0.0346126		-4.65	0.0392434	0.038087
-12.276	0.0619714	0.0447679		-6.231	0.0396255	0.0237446		-3.441	0.0388522	0.0363666		-3.441	0.0463716	0.0357598		-4.557	0.0386169	0.0351978
-12.183	0.0611517	0.0440056		-6.138	0.0389418	0.024212		-3.348	0.0381827	0.0352188		-3.348	0.0469137	0.03612		-4.464	0.0375222	0.0322097
-12.09	0.0605774	0.0436255		-6.045	0.0385817	0.0241593		-3.255	0.0384099	0.0376042		-3.255	0.046901	0.0365326		-4.371	0.0364211	0.0298091
-11.997	0.0596606	0.0435455		-5.952	0.0389015	0.0248999		-3.162	0.0388933	0.0388032		-3.162	0.0472367	0.0368878		-4.278	0.0355236	0.0273718
-11.904	0.0584288	0.0436127		-5.859	0.0394642	0.0261034		-3.069	0.038715	0.0379911		-3.069	0.0477094	0.036816		-4.185	0.0347706	0.0256261
-11.811	0.0585231	0.0448436		-5.766	0.0407114	0.0287577		-2.976	0.0389722	0.0374351		-2.976	0.0489792	0.0377294		-4.092	0.0341423	0.0250854
-11.718	0.0571132	0.045399		-5.673	0.0427247	0.0389759		-2.883	0.0392743	0.0359891		-2.883	0.0512111	0.0397929		-3.999	0.0331331	0.0245272
-11.625	0.0550682	0.0426055		-5.58	0.0412645	0.0351619		-2.79	0.0399097	0.0345898		-2.79	0.0534789	0.0405837		-3.906	0.0325223	0.0246801
-11.532	0.0533	0.0393841		-5.487	0.0398974	0.0313278		-2.697	0.0408673	0.0344605		-2.697	0.0558319	0.0421381		-3.813	0.0324318	0.0257548
-11.439	0.0512876	0.0369083		-5.394	0.0384296	0.0282159		-2.604	0.0419866	0.0347564		-2.604	0.0587868	0.0450088		-3.72	0.0317439	0.0269615
-11.346	0.0489725	0.0344876		-5.301	0.0368362	0.0251397		-2.511	0.0434996	0.0359013		-2.511	0.0615024	0.0479766		-3.627	0.0312355	0.0264164
-11.253	0.0503799	0.0351242		-5.208	0.0359017	0.0227353		-2.418	0.0452349	0.0378126		-2.418	0.0640298	0.0511448		-3.534	0.0311942	0.0259462
-11.16	0.0488955	0.0329006		-5.115	0.0352705	0.0204508		-2.325	0.0471531	0.040229		-2.325	0.067914	0.0547304		-3.441	0.0313733	0.0261195
-11.067	0.0477509	0.0313551		-5.022	0.0344018	0.0187446		-2.232	0.0496942	0.0438301		-2.232	0.0710737	0.05705		-3.348	0.0318881	0.0272163
-10.974	0.0463759	0.0301203		-4.929	0.0337456	0.0175005		-2.139	0.0520013	0.0460451		-2.139	0.0748318	0.059826		-3.255	0.0321256	0.0277144
-10.881	0.0451857	0.0290187		-4.836	0.03308	0.0170954		-2.046	0.054327	0.0476423		-2.046	0.0787128	0.060024		-3.162	0.0325577	0.0287613
-10.788	0.0451588	0.0288424		-4.743	0.0324299	0.0171254		-1.953	0.0568925	0.0488596		-1.953	0.0827551	0.0600521		-3.069	0.0331343	0.0301227
-10.695	0.0446577	0.0280804		-4.65	0.0325955	0.0169399		-1.86	0.0597093	0.0487548		-1.86	0.0870576	0.0600306		-2.976	0.0335792	0.0300553
-10.602	0.0447479	0.0277831		-4.557	0.0328804	0.016771		-1.767	0.0627308	0.0492458		-1.767	0.0913752	0.0614128		-2.883	0.0342763	0.0290386
-10.509	0.0445745	0.0277002		-4.464	0.0334534	0.0170444		-1.674	0.0658429	0.0499958		-1.674	0.0958594	0.064064		-2.79	0.035449	0.0283857
-10.416	0.0441834	0.0277739		-4.371	0.0350994	0.0206051		-1.581	0.0688471	0.0512254		-1.581	0.0998284	0.0674755		-2.697	0.0367127	0.028455
-10.323	0.0448988	0.0287054		-4.278	0.0356972	0.0215007		-1.488	0.0716772	0.0527507		-1.488	0.104068	0.0716177		-2.604	0.0379844	0.0288089
-10.23	0.0447148	0.0279027		-4.185	0.0364679	0.0218148		-1.395	0.0745955	0.0547197		-1.395	0.108118	0.0756356		-2.511	0.0393159	0.0283343
-10.137	0.0443196	0.0273149		-4.092	0.0370127	0.0222338		-1.302	0.077607	0.0563026		-1.302	0.11181	0.078653		-2.418	0.0407912	0.0284388
-10.044	0.0444716	0.0271028		-3.999	0.0376114	0.0229752		-1.209	0.0806827	0.0581059		-1.209	0.115331	0.0813355		-2.325	0.0422069	0.0289223
-9.951	0.0457225	0.0286019		-3.906	0.0383389	0.0240755		-1.116	0.0836883	0.0588443		-1.116	0.11849	0.0823192		-2.232	0.0436881	0.0301399
-9.858	0.0448465	0.0279352		-3.813	0.0393706	0.0254246		-1.023	0.086466	0.0600079		-1.023	0.121853	0.083281		-2.139	0.0453073	0.0318123
-9.765	0.0440431	0.0263621		-3.72	0.0401847	0.0265528		-0.93	0.0889281	0.0595381		-0.93	0.123853	0.0813879		-2.046	0.0471462	0.0329683
-9.672	0.0431393	0.0250686		-3.627	0.0409677	0.0273247		-0.837	0.0911623	0.0598503		-0.837	0.125918	0.0808972		-1.953	0.0488082	0.032768
-9.579	0.0422938	0.0240378		-3.534	0.0417468	0.0282844		-0.744	0.0930012	0.0607301		-0.744	0.126099	0.079195		-1.86	0.0503379	0.032603
-9.486	0.0413412	0.0232669		-3.441	0.0425228	0.0294982		-0.651	0.09484	0.0622391		-0.651	0.127616	0.0809817		-1.767	0.0522031	0.0331276
-9.393	0.0403855	0.0228017		-3.348	0.0434986	0.0312456		-0.558	0.0968738	0.0643069		-0.558	0.129574	0.083421		-1.674	0.0540616	0.0334559
-9.3	0.0395551	0.0224078		-3.255	0.0443921	0.0316809		-0.465	0.0986848	0.0670772		-0.465	0.13138	0.0864571		-1.581	0.0561042	0.0347857
-9.207	0.0392458	0.0225092		-3.162	0.0452673	0.0324592		-0.372	0.100334	0.0689555		-0.372	0.133329	0.0891685		-1.488	0.0582531	0.0367739
-9.114	0.0386457	0.0229199		-3.069	0.046294	0.0332478		-0.279	0.101326	0.069141		-0.279	0.13551	0.0913595		-1.395	0.060608	0.0392982
-9.021	0.0378347	0.0234363		-2.976	0.047792	0.0343531		-0.186	0.10215	0.0690797		-0.186	0.137894	0.0918309		-1.302	0.0629365	0.0424078
-8.928	0.0374811	0.0241735		-2.883	0.0489644	0.0353836		-0.093	0.103047	0.0687172		-0.093	0.139423	0.0912323		-1.209	0.0654074	0.0458995
-8.835	0.0370208	0.0233118		-2.79	0.0499278	0.0366506		0	0.104157	0.0675159		0	0.141599	0.0893366		-1.116	0.0675634	0.0487239
-8.742	0.036347	0.022365		-2.697	0.0510759	0.036118		0.093	0.105335	0.0668231		0.093	0.14323	0.0886639		-1.023	0.0695917	0.0511714
-8.649	0.0358933	0.0217738		-2.604	0.0520352	0.0353909		0.186	0.105237	0.0658377		0.186	0.14665	0.0905389		-0.93	0.0714154	0.0527627
-8.556	0.0355128	0.021521		-2.511	0.0529002	0.0348889		0.279	0.106228	0.0652174		0.279	0.147273	0.0917199		-0.837	0.0728748	0.0535667
-8.463	0.0355993	0.0217183		-2.418	0.053831	0.0345826		0.372	0.107007	0.0655528		0.372	0.149138	0.0942257		-0.744	0.0740003	0.0533289
-8.37	0.0353335	0.0216389		-2.325	0.054506	0.0345159		0.465	0.1078	0.0665019		0.465	0.151236	0.0976635		-0.651	0.0750886	0.052182
-8.277	0.0349594	0.0216944		-2.232	0.0552804	0.0347704		0.558	0.108555	0.067541		0.558	0.152639	0.0993335		-0.558	0.075991	0.0511319
-8.184	0.0346154	0.0221021		-2.139	0.0560342	0.034922		0.651	0.109487	0.0692393		0.651	0.152953	0.100768		-0.465	0.0764964	0.0503686
-8.091	0.0343988	0.0225317		-2.046	0.0564486	0.0342977		0.744	0.110622	0.070916		0.744	0.152058	0.0993943		-0.372	0.0771281	0.0506591
-7.998	0.0353592	0.0254301		-1.953	0.0572093	0.0344358		0.837	0.111658	0.0720423		0.837	0.152774	0.098499		-0.279	0.0775158	0.0508303
-7.905	0.0355414	0.025296		-1.86	0.0583484	0.0347192		0.93	0.111006	0.0703902		0.93	0.152555	0.097008		-0.186	0.0778101	0.0517876
-7.812	0.0356317	0.0243841		-1.767	0.0591045	0.0352485		1.023	0.110553	0.0702026		1.023	0.149747	0.0945553		-0.093	0.0783132	0.0527964
-7.719	0.0356719	0.0236346		-1.674	0.0604206	0.0360668		1.116	0.11126	0.0697817		1.116	0.149356	0.0949627		0	0.0788401	0.0534443
-7.626	0.0356897	0.0232483		-1.581	0.0615646	0.036357		1.209	0.112191	0.0691093		1.209	0.148254	0.0954939		0.093	0.0794898	0.0549717
-7.533	0.0358094	0.02327		-1.488	0.0625168	0.0367634		1.302	0.112853	0.0693022		1.302	0.147887	0.0963991		0.186	0.0804887	0.0564034
-7.44	0.0359564	0.0235444		-1.395	0.0635187	0.0374933		1.395	0.113391	0.0693633		1.395	0.146863	0.0964672		0.279	0.0812593	0.0565527
-7.347	0.0361563	0.0242731		-1.302	0.0646634	0.0383661		1.488	0.114112	0.06978		1.488	0.14721	0.0971851		0.372	0.0820538	0.055833
-7.254	0.0363883	0.0253502		-1.209	0.0659924	0.0392433		1.581	0.114852	0.0699615		1.581	0.147681	0.0983472		0.465	0.0829074	0.0558558
-7.161	0.0363803	0.0263645		-1.116	0.0673014	0.0399171		1.674	0.115195	0.0696917		1.674	0.148026	0.0974018		0.558	0.0835758	0.0561579
-7.068	0.0363614	0.0272209		-1.023	0.0681796	0.0393444		1.767	0.1156	0.0700409		1.767	0.146766	0.0954461		0.651	0.0845035	0.0574178
-6.975	0.0366391	0.0271562		-0.93	0.0687419	0.0383386		1.86	0.116296	0.0705123		1.86	0.145196	0.0939914		0.744	0.0856607	0.0592975
-6.882	0.0372752	0.0274279		-0.837	0.0694252	0.0381662		1.953	0.115927	0.0718194		1.953	0.140863	0.0942344		0.837	0.0866169	0.059613
-6.789	0.0378007	0.0277865		-0.744	0.0700308	0.0386452		2.046	0.116421	0.0729335		2.046	0.141063	0.0938273		0.93	0.0878076	0.0587686
-6.696	0.038361	0.0284933		-0.651	0.0708935	0.0397215		2.139	0.117207	0.0743822		2.139	0.141082	0.0943277		1.023	0.0885987	0.0581182
-6.603	0.0386746	0.0291802		-0.558	0.0716801	0.0415921		2.232	0.117546	0.0753383		2.232	0.141468	0.0953664		1.116	0.0894503	0.0574118
-6.51	0.0391155	0.0301437		-0.465	0.07248	0.0440221		2.325	0.117434	0.0751337		2.325	0.141922	0.0968905		1.209	0.090197	0.0569566
-6.417	0.0395986	0.030597		-0.372	0.0729405	0.0464675		2.418	0.118414	0.07671		2.418	0.141006	0.0958597		1.302	0.0909467	0.0571439
-6.324	0.040131	0.031612		-0.279	0.0726245	0.0486086		2.511	0.11917	0.078006		2.511	0.140216	0.0947052		1.395	0.0916745	0.0580877
-6.231	0.0406745	0.0329958		-0.186	0.0723545	0.0501823		2.604	0.119898	0.0794333		2.604	0.139979	0.0923929		1.488	0.092378	0.0600083
-6.138	0.0413534	0.0344186		-0.093	0.0722611	0.051992		2.697	0.120527	0.0810383		2.697	0.139775	0.0914327		1.581	0.0928405	0.0613028
-6.045	0.0414905	0.0335459		0	0.0716012	0.0533857		2.79	0.120769	0.0811677		2.79	0.138999	0.0914239		1.674	0.0929197	0.0623237
-5.952	0.0414873	0.032555		0.093	0.0713105	0.0550071		2.883	0.121446	0.0820946		2.883	0.140222	0.0921889		1.767	0.0920655	0.0609099
-5.859	0.0415918	0.0319082		0.186	0.0709568	0.0557443		2.976	0.122258	0.0827883		2.976	0.141891	0.0925833		1.86	0.0918683	0.0604018
-5.766	0.0416597	0.0317076		0.279	0.070183	0.0540291		3.069	0.122748	0.0832934		3.069	0.143523	0.0937401		1.953	0.0917866	0.0603757
-5.673	0.0419049	0.0317438		0.372	0.0694422	0.0525504		3.162	0.123388	0.0838474		3.162	0.145076	0.0957632		2.046	0.0912919	0.0591482
-5.58	0.0408141	0.0279943		0.465	0.0689851	0.0513962		3.255	0.123694	0.0838518		3.255	0.144605	0.0966928		2.139	0.0909809	0.0583015
-5.487	0.0408447	0.0278669		0.558	0.0685662	0.0502836		3.348	0.123529	0.0816141		3.348	0.14563	0.0978731		2.232	0.0906787	0.0577117
-5.394	0.040925	0.0282076		0.651	0.0688334	0.0490496		3.441	0.12413	0.0804755		3.441	0.145429	0.0985727		2.325	0.0907771	0.0580539
-5.301	0.0409449	0.028875		0.744	0.0694557	0.0476962		3.534	0.124762	0.07964		3.534	0.143954	0.0963507		2.418	0.0908217	0.0588965
-5.208	0.041152	0.0291462		0.837	0.0695544	0.0466239		3.627	0.124748	0.0791838		3.627	0.141537	0.0962244		2.511	0.0906496	0.0598172
-5.115	0.0417355	0.0286677		0.93	0.0699434	0.0457308		3.72	0.125068	0.0783866		3.72	0.139993	0.0916037		2.604	0.0914207	0.0612347
-5.022	0.0424405	0.028417		1.023	0.0701794	0.0447246		3.813	0.126337	0.0782415		3.813	0.14065	0.0919315		2.697	0.0920046	0.0616788
-4.929	0.0431675	0.0283804		1.116	0.0700785	0.044425		3.906	0.126793	0.0783721		3.906	0.141519	0.0930588		2.79	0.0927479	0.0611825
-4.836	0.0439926	0.0286132		1.209	0.0704258	0.0444662		3.999	0.128036	0.0790574		3.999	0.142397	0.0947102		2.883	0.0941354	0.0612287
-4.743	0.0447887	0.029287		1.302	0.0709554	0.0447321		4.092	0.128961	0.080438		4.092	0.143541	0.0955937		2.976	0.096171	0.0611935
-4.65	0.0458583	0.0296751		1.395	0.071132	0.0446568		4.185	0.129799	0.0830356		4.185	0.141961	0.0931019		3.069	0.0983783	0.0617585
-4.557	0.0467201	0.0298258		1.488	0.0715303	0.0450831		4.278	0.131202	0.0847408		4.278	0.142773	0.0933211		3.162	0.100765	0.0620868
-4.464	0.0475476	0.0301123		1.581	0.0714464	0.0451049		4.371	0.132279	0.0852646		4.371	0.143537	0.0934764		3.255	0.103526	0.063247
-4.371	0.0482165	0.0308472		1.674	0.0717399	0.0444457		4.464	0.132717	0.0855573		4.464	0.142397	0.0909267		3.348	0.105722	0.064559
-4.278	0.0491319	0.0312734		1.767	0.072012	0.0441058		4.557	0.133289	0.0854248		4.557	0.143706	0.0917309		3.441	0.108026	0.066994
-4.185	0.0501966	0.0307117		1.86	0.0723552	0.0438105		4.65	0.132965	0.083935		4.65	0.144259	0.0900216		3.534	0.109255	0.0674067
-4.092	0.0508722	0.0306331		1.953	0.0726819	0.043935		4.743	0.133219	0.0830252		4.743	0.146324	0.0896224		3.627	0.110523	0.0681238
-3.999	0.0513043	0.0307325		2.046	0.0738971	0.0447111		4.836	0.133408	0.0819408		4.836	0.148323	0.0894527		3.72	0.112055	0.0692119
-3.906	0.0517122	0.0312266		2.139	0.0743807	0.0454504		4.929	0.134032	0.0812166		4.929	0.150513	0.0904288		3.813	0.113443	0.0705633
-3.813	0.0525356	0.0322855		2.232	0.074747	0.0471619		5.022	0.13478	0.0814568		5.022	0.151338	0.0910757		3.906	0.114	0.0713171
-3.72	0.0533061	0.0335224		2.325	0.0751436	0.0487197		5.115	0.134671	0.0806738		5.115	0.152298	0.0909278		3.999	0.113719	0.0710585
-3.627	0.0538558	0.0348989		2.418	0.0746513	0.0503449		5.208	0.134944	0.0808975		5.208	0.154379	0.0921489		4.092	0.112775	0.0703262
-3.534	0.0546963	0.0357666		2.511	0.0754898	0.0525409		5.301	0.134981	0.0814654		5.301	0.153271	0.0942092		4.185	0.111309	0.069464
-3.441	0.0552562	0.0369673		2.604	0.0757232	0.052743		5.394	0.135495	0.0826101		5.394	0.153807	0.0937953		4.278	0.109628	0.0691372
-3.348	0.0559854	0.0369474		2.697	0.0760284	0.0515633		5.487	0.136109	0.083389		5.487	0.155698	0.0956659		4.371	0.107723	0.0696673
-3.255	0.0559181	0.0358417		2.79	0.0763258	0.0503146		5.58	0.136429	0.0825857		5.58	0.155745	0.0958496		4.464	0.107193	0.0701773
-3.162	0.0566365	0.0358172		2.883	0.076498	0.0491929		5.673	0.137053	0.0823026		5.673	0.156558	0.0979963		4.557	0.105767	0.069083
-3.069	0.0576698	0.0355737		2.976	0.0762065	0.0480578		5.766	0.136998	0.081591		5.766	0.156853	0.100246		4.65	0.105198	0.0684916
-2.976	0.0587155	0.0356221		3.069	0.0765196	0.0474125		5.859	0.136655	0.0807102		5.859	0.156595	0.0998473		4.743	0.104336	0.0677597
-2.883	0.0595891	0.0358104		3.162	0.0767617	0.0471169		5.952	0.136137	0.081021		5.952	0.156291	0.0994184		4.836	0.104218	0.0667968
-2.79	0.0604037	0.0364731		3.255	0.0775866	0.0475011		6.045	0.135435	0.0812507		6.045	0.153977	0.0985777		4.929	0.104185	0.0655196
-2.697	0.0610914	0.0374145		3.348	0.0783079	0.048611		6.138	0.135931	0.0821888		6.138	0.151815	0.0958852		5.022	0.104867	0.0645202
-2.604	0.0615627	0.0378253		3.441	0.0789269	0.0490505		6.231	0.136494	0.0832357		6.231	0.152228	0.0962154		5.115	0.105898	0.0641342
-2.511	0.0618553	0.0378043		3.534	0.0796667	0.0494573		6.324	0.137487	0.0845731		6.324	0.153118	0.0959839		5.208	0.107507	0.0642305
-2.418	0.0617805	0.0376523		3.627	0.0796296	0.0495902		6.417	0.137476	0.084281		6.417	0.15413	0.0951181		5.301	0.107916	0.0634441
-2.325	0.0612132	0.0378446		3.72	0.0805343	0.0497764		6.51	0.138456	0.083773		6.51	0.156613	0.0945235		5.394	0.109716	0.0646541
-2.232	0.0610056	0.0377651		3.813	0.0807578	0.0508585		6.603	0.139161	0.0835391		6.603	0.15863	0.0954408		5.487	0.111643	0.0669006
-2.139	0.0597951	0.0368597		3.906	0.0814132	0.0524505		6.696	0.140801	0.0838111		6.696	0.158945	0.0951711		5.58	0.112934	0.0693269
-2.046	0.0592105	0.037		3.999	0.0813676	0.0540381		6.789	0.142196	0.0837379		6.789	0.15914	0.0944272		5.673	0.114483	0.0726895
-1.953	0.0587686	0.037415		4.092	0.0816737	0.0560045		6.882	0.143688	0.0847504		6.882	0.158594	0.0940443		5.766	0.115739	0.074496
-1.86	0.0578428	0.0381345		4.185	0.082009	0.0569003		6.975	0.14452	0.0870358		6.975	0.159899	0.0953606		5.859	0.117859	0.076957
-1.767	0.0574484	0.0387569		4.278	0.0816908	0.0578676		7.068	0.145805	0.0889149		7.068	0.161511	0.0963886		5.952	0.119457	0.0784704
-1.674	0.0574986	0.0398369		4.371	0.0806329	0.0568931		7.161	0.147046	0.090189		7.161	0.163566	0.0992212		6.045	0.121031	0.0787581
-1.581	0.0577708	0.0410837		4.464	0.0795837	0.0553952		7.254	0.146989	0.0900641		7.254	0.164351	0.100041		6.138	0.122185	0.0793632
-1.488	0.0582328	0.0419487		4.557	0.0794347	0.0535763		7.347	0.148017	0.0913296		7.347	0.163833	0.0991713		6.231	0.123612	0.0803278
-1.395	0.05882	0.0414489		4.65	0.0791244	0.0517223		7.44	0.146754	0.0881787		7.44	0.164335	0.0975301		6.324	0.124993	0.0814045
-1.302	0.0592902	0.0414092		4.743	0.0789202	0.0505668		7.533	0.147504	0.087533		7.533	0.165259	0.0973275		6.417	0.124916	0.0777531
-1.209	0.059783	0.0413272		4.836	0.0775651	0.0474948		7.626	0.146345	0.0854265		7.626	0.166764	0.0978866		6.51	0.126933	0.0795015
-1.116	0.0601299	0.0415657		4.929	0.0770537	0.0460397		7.719	0.146204	0.0845045		7.719	0.169222	0.0994368		6.603	0.127884	0.0816323
-1.023	0.0602282	0.0423075		5.022	0.0772092	0.0453193		7.812	0.14655	0.0847345		7.812	0.167948	0.0990939		6.696	0.128712	0.0823404
-0.93	0.0600313	0.0432262		5.115	0.0782117	0.0458003		7.905	0.147187	0.0861904		7.905	0.168884	0.0992286		6.789	0.127852	0.0810104
-0.837	0.0599259	0.044312		5.208	0.0791602	0.0472352		7.998	0.148212	0.0880332		7.998	0.170639	0.0993487		6.882	0.125896	0.0804509
-0.744	0.0593132	0.0446252		5.301	0.0808177	0.0485523		8.091	0.149283	0.0902584		8.091	0.169266	0.100226		6.975	0.121944	0.0728957
-0.651	0.0586235	0.0453197		5.394	0.0829457	0.0492835		8.184	0.148749	0.0908521		8.184	0.167446	0.0987318		7.068	0.122882	0.0737192
-0.558	0.0580087	0.0452716		5.487	0.0831564	0.0473667		8.277	0.150272	0.0920725		8.277	0.167089	0.098348		7.161	0.123674	0.0744513
-0.465	0.0574085	0.0438656		5.58	0.0847205	0.0474057		8.37	0.150648	0.0905683		8.37	0.165721	0.0947596		7.254	0.12263	0.0711643
-0.372	0.0570125	0.0423518		5.673	0.0863126	0.0484042		8.463	0.151347	0.0895383		8.463	0.165332	0.0932241		7.347	0.120532	0.0702035
-0.279	0.0559178	0.040175		5.766	0.0864631	0.0483647		8.556	0.149893	0.0874762		8.556	0.164062	0.0905526		7.44	0.120243	0.0711051
-0.186	0.0585328	0.046139		5.859	0.0881812	0.0496957		8.649	0.148566	0.0851142		8.649	0.164754	0.0897732		7.533	0.121084	0.0731738
-0.093	0.0584443	0.0440098		5.952	0.0893712	0.050598		8.742	0.149308	0.0853046		8.742	0.164973	0.0900343		7.626	0.122687	0.0747541
0	0.0586524	0.041999		6.045	0.0898813	0.0512821		8.835	0.150941	0.086818		8.835	0.16547	0.0890264		7.719	0.12498	0.0762937
0.093	0.0588562	0.0401278		6.138	0.0905261	0.0527165		8.928	0.150928	0.0884147		8.928	0.16512	0.0899939		7.812	0.126922	0.0754862
0.186	0.0592807	0.0387653		6.231	0.0911745	0.0539805		9.021	0.150448	0.0884566		9.021	0.166064	0.0924802		7.905	0.12329	0.0675544
0.279	0.0595383	0.0376351		6.324	0.0918883	0.0549228		9.114	0.1507	0.0882948		9.114	0.166162	0.0943843		7.998	0.125095	0.0675973
0.372	0.0595594	0.036132		6.417	0.0936738	0.0561632		9.207	0.151273	0.0902345		9.207	0.168145	0.0952561		8.091	0.126794	0.06837
0.465	0.0589249	0.0343216		6.51	0.0959779	0.0574566		9.3	0.149988	0.0878198		9.3	0.169773	0.0954003		8.184	0.128814	0.0698375
0.558	0.0584123	0.0327413		6.603	0.0976121	0.0599242		9.393	0.150612	0.0878364		9.393	0.171709	0.0955606		8.277	0.126807	0.068732
0.651	0.0578607	0.0316705		6.696	0.0990626	0.0626654		9.486	0.152127	0.0884694		9.486	0.172241	0.0923152		8.37	0.128623	0.0699052
0.744	0.0573814	0.0308592		6.789	0.099935	0.0652475		9.579	0.151723	0.0883704		9.579	0.172967	0.0918724		8.463	0.129265	0.0703286
0.837	0.0566829	0.0302201		6.882	0.101716	0.0683531		9.672	0.152686	0.0890808		9.672	0.174863	0.0922244		8.556	0.129305	0.0722932
0.93	0.0557262	0.0298049		6.975	0.103262	0.0714344		9.765	0.1532	0.0908642		9.765	0.176465	0.0915325		8.649	0.125932	0.0645139
1.023	0.0547354	0.0295982		7.068	0.104573	0.0748188		9.858	0.153504	0.0920892		9.858	0.178729	0.093939		8.742	0.127074	0.0643386
1.116	0.0541693	0.0305008		7.161	0.105116	0.0757717		9.951	0.152952	0.0952274		9.951	0.180869	0.0983084		8.835	0.128441	0.0666275
1.209	0.0540766	0.0318645		7.254	0.105652	0.0761157		10.044	0.146027	0.0915918		10.044	0.181538	0.0979737		8.928	0.128517	0.0663687
1.302	0.0546313	0.0334387		7.347	0.104739	0.0755485		10.137	0.147408	0.0964937		10.137	0.182124	0.09992		9.021	0.130424	0.0711516
1.395	0.0539777	0.0331355		7.44	0.103606	0.0741326		10.23	0.148914	0.097253		10.23	0.179103	0.0978717		9.114	0.132027	0.0729202
1.488	0.0546809	0.0347137		7.533	0.102611	0.0728215		10.323	0.148078	0.0971484		10.323	0.18101	0.100533		9.207	0.13417	0.0747307
1.581	0.0551436	0.0362817		7.626	0.101606	0.0719141		10.416	0.147907	0.0964173		10.416	0.182179	0.0999984		9.3	0.135376	0.0787801
1.674	0.0555232	0.038243		7.719	0.0990949	0.0697049		10.509	0.148837	0.0941712		10.509	0.180915	0.0999224		9.393	0.137873	0.0840897
1.767	0.0562671	0.0403474		7.812	0.0991882	0.0691428		10.602	0.149087	0.0924777		10.602	0.181591	0.100534		9.486	0.143119	0.0874802
1.86	0.0571961	0.0427498		7.905	0.0979979	0.067666		10.695	0.151129	0.0912523		10.695	0.18166	0.0988843		9.579	0.138585	0.0808531
1.953	0.0572758	0.0442357		7.998	0.0969159	0.0669998		10.788	0.150915	0.0906848		10.788	0.183276	0.0997288		9.672	0.141317	0.0826232
2.046	0.0577233	0.0440244		8.091	0.0953937	0.0651903		10.881	0.150563	0.0914225		10.881	0.186138	0.101259		9.765	0.14564	0.0846604
2.139	0.0566935	0.0424622		8.184	0.0948633	0.0629347		10.974	0.147324	0.0929148		10.974	0.181815	0.0994522		9.858	0.148678	0.0885632
2.232	0.0573016	0.0418902		8.277	0.0945571	0.0609096		11.067	0.145833	0.0952927		11.067	0.181457	0.100133		9.951	0.149539	0.0931402
2.325	0.0580087	0.040858		8.37	0.0941299	0.0587716		11.16	0.147745	0.0961211		11.16	0.179338	0.097682		10.044	0.142512	0.0918947
2.418	0.0590196	0.0401613		8.463	0.0935036	0.0571745		11.253	0.149423	0.097123		11.253	0.177158	0.0980591		10.137	0.144639	0.0986663
2.511	0.0599606	0.0400355		8.556	0.0929894	0.0556647		11.346	0.149861	0.0956313		11.346	0.177163	0.0987478		10.23	0.137593	0.0841709
2.604	0.0610465	0.0406051		8.649	0.0929112	0.0547359		11.439	0.148797	0.0942798		11.439	0.177846	0.100181		10.323	0.152097	0.0931541
2.697	0.0619168	0.0411033		8.742	0.0920822	0.0535639		11.532	0.148708	0.0939113		11.532	0.178353	0.102003		10.416	0.134455	0.0759116
2.79	0.0610793	0.0392721		8.835	0.0920069	0.0531939		11.625	0.146686	0.0931421		11.625	0.175636	0.0968793		10.509	0.1436	0.0881754
2.883	0.0619446	0.0407076		8.928	0.0922616	0.0531775		11.718	0.14259	0.0859337		11.718	0.175375	0.0962454		10.602	0.13956	0.0902795
2.976	0.0629282	0.0430258		9.021	0.0918683	0.0524456		11.811	0.142831	0.0875172		11.811	0.175293	0.0969837
3.069	0.0636598	0.0446464		9.114	0.0916988	0.0514691		11.904	0.142249	0.0900167		11.904	0.175292	0.0973094
3.162	0.0636361	0.0460253		9.207	0.0914302	0.0509807		11.997	0.142045	0.0938505		11.997	0.177619	0.0994924
3.255	0.0638887	0.0466473		9.3	0.0925143	0.0495597		12.09	0.136889	0.0910487		12.09	0.179713	0.100546
3.348	0.0643358	0.0476976		9.393	0.0923209	0.0497195		12.183	0.133526	0.0907658		12.183	0.183171	0.100486
3.441	0.0641642	0.0464836		9.486	0.0920429	0.0501859		12.276	0.133723	0.0895542		12.276	0.184839	0.0995035
3.534	0.0636921	0.0455012		9.579	0.0919492	0.0510637		12.369	0.135352	0.0875654		12.369	0.184805	0.0998819
3.627	0.0633644	0.0444023		9.672	0.0922636	0.0523049		12.462	0.137909	0.0876695		12.462	0.184962	0.100208
3.72	0.0629772	0.0434031		9.765	0.0916599	0.0505455		12.555	0.141595	0.0889582		12.555	0.188842	0.0989733
3.813	0.0621645	0.0425405		9.858	0.0895143	0.0488193		12.648	0.14518	0.0918915		12.648	0.191012	0.0985416
3.906	0.061616	0.0423955		9.951	0.0898659	0.049112		12.741	0.147873	0.0944163		12.741	0.193083	0.0997795
3.999	0.0592764	0.039068		10.044	0.0899694	0.0498065		12.834	0.151468	0.0980871		12.834	0.194292	0.0988436
4.092	0.0585651	0.0390009		10.137	0.0903637	0.0506387		12.927	0.154104	0.101897		12.927	0.195262	0.100641
4.185	0.0578482	0.0369151		10.23	0.0910101	0.0513932		13.02	0.155237	0.107014		13.02	0.193105	0.0935176
4.278	0.0568852	0.0350518		10.323	0.0926811	0.0534859		13.113	0.148906	0.107731		13.113	0.193781	0.0967606
4.371	0.0563509	0.033947		10.416	0.0939882	0.0566518		13.206	0.145193	0.101872		13.206	0.194419	0.0972318
4.464	0.0561518	0.0331684		10.509	0.0912363	0.0540442		13.299	0.140609	0.0963837		13.299	0.196397	0.0974045
4.557	0.0552455	0.0326237		10.602	0.0916994	0.0572767		13.392	0.141628	0.0929662		13.392	0.195907	0.0980387
4.65	0.0547913	0.0318882		10.695	0.0908743	0.0561369		13.485	0.144455	0.0911915		13.485	0.191647	0.0900546
4.743	0.0546173	0.0314487		10.788	0.0934509	0.0594167		13.578	0.147596	0.0904982		13.578	0.191374	0.0881253
4.836	0.0548275	0.0316203		10.881	0.0940254	0.061498		13.671	0.148539	0.0911291		13.671	0.189818	0.0884658
4.929	0.0544915	0.0319395		10.974	0.0947888	0.0636007		13.764	0.148891	0.09234		13.764	0.193296	0.0908638
5.022	0.05392	0.0318797		11.067	0.0915011	0.0543961		13.857	0.149243	0.0948314		13.857	0.19158	0.091105
5.115	0.0542751	0.0306081		11.16	0.0925862	0.0550534		13.95	0.149239	0.0983459		13.95	0.187453	0.088704
5.208	0.0548397	0.0298235		11.253	0.0921277	0.0530062		14.043	0.136159	0.0937949		14.043	0.189239	0.0906129
5.301	0.0553346	0.0297545		11.346	0.0920663	0.0519584		14.136	0.116401	0.0490516		14.136	0.188979	0.0868171
5.394	0.0554591	0.0303949		11.439	0.093063	0.0515194		14.229	0.105169	0.059735		14.229	0.187071	0.084935
5.487	0.0563347	0.0313319		11.532	0.0938939	0.0523639		14.322	0.10583	0.0599965		14.322	0.189211	0.0832059
5.58	0.0570791	0.0319861		11.625	0.0939539	0.050806		14.415	0.10278	0.0565076		14.415	0.189939	0.0834188
5.673	0.0580514	0.033194		11.718	0.0937585	0.051247		14.508	0.09973	0.0533586		14.508	0.195965	0.0853129
5.766	0.0588945	0.0346843		11.811	0.0951309	0.0516275		14.601	0.09668	0.050613		14.601	0.199323	0.0900293
5.859	0.0599466	0.0365799		11.904	0.0967297	0.0533111						14.694	0.204274	0.0950641
5.952	0.0606769	0.0375252		11.997	0.0981358	0.0558223						14.787	0.208895	0.104331
6.045	0.0615048	0.0361398		12.09	0.0972312	0.0587018						14.88	0.215593	0.102838
6.138	0.0621699	0.0353783		12.183	0.0983595	0.0622125						14.973	0.220413	0.100914
6.231	0.0623498	0.0348156		12.276	0.0994059	0.0645168						15.066	0.224506	0.10989
6.324	0.0627638	0.0350365		12.369	0.095507	0.0608159						15.159	0.221833	0.113138
6.417	0.0626876	0.0354698		12.462	0.0966033	0.0624715						15.252	0.210702	0.104276
6.51	0.0623894	0.0358758		12.555	0.0964553	0.0628357						15.345	0.215157	0.112193
6.603	0.0619354	0.0353008		12.648	0.0954552	0.0636488						15.438	0.215834	0.120098
6.696	0.0615992	0.0353205		12.741	0.0951475	0.0638919						15.531	0.216512	0.128749
6.789	0.0612951	0.0355623		12.834	0.093879	0.0634224						15.624	0.157824	0.0759284
6.882	0.0611838	0.036536		12.927	0.0909218	0.0588385						15.717	0.153754	0.0805848
6.975	0.0611937	0.035973		13.02	0.0913352	0.0593913						15.81	0.17015	0.0854889
7.068	0.0612697	0.0360475		13.113	0.0887681	0.0555597
7.161	0.0614977	0.0368335		13.206	0.0889352	0.0553277
7.254	0.0618233	0.0382402		13.299	0.089327	0.0555568
7.347	0.0634971	0.0403256		13.392	0.088844	0.0559614
7.44	0.0634039	0.0403974		13.485	0.0886177	0.0571107
7.533	0.0636936	0.04079		13.578	0.0884757	0.0590878
7.626	0.0639026	0.0417435		13.671	0.0885463	0.0618136
7.719	0.0641084	0.0428071		13.764	0.0860193	0.0623813
7.812	0.0642472	0.0439711		13.857	0.0864273	0.06064
7.905	0.0623117	0.0409932		13.95	0.0880331	0.0598162
7.998	0.0612389	0.0396133		14.043	0.0880892	0.0589408
8.091	0.0610815	0.0393487		14.136	0.0883808	0.0581402
8.184	0.0602837	0.0395349		14.229	0.0883033	0.0585501
8.277	0.0600868	0.0396839		14.322	0.0886065	0.0591276
8.37	0.0599835	0.0398461		14.415	0.0904922	0.0604744
8.463	0.0597112	0.0394975		14.508	0.0918368	0.0627744
8.556	0.059512	0.0397986		14.601	0.0934142	0.0658294
8.649	0.0592011	0.0403203		14.694	0.0929024	0.0643853
8.742	0.0584693	0.041158		14.787	0.093971	0.0635837
8.835	0.0579854	0.0386992		14.88	0.0955704	0.0648861
8.928	0.058339	0.0369133		14.973	0.0973846	0.0666685
9.021	0.0584979	0.0357642		15.066	0.0993698	0.0697626
9.114	0.0588112	0.0349435		15.159	0.100551	0.0704383
9.207	0.0589445	0.0339889		15.252	0.102299	0.0715334
9.3	0.059141	0.0334384		15.345	0.0974706	0.0606806
9.393	0.0596154	0.032877		15.438	0.0997093	0.0632381
9.486	0.0599168	0.0329616		15.531	0.100653	0.0661568
9.579	0.0603724	0.0336117		15.624	0.102405	0.0635513
9.672	0.0610107	0.0351959		15.717	0.10254	0.0615143
9.765	0.061435	0.035755		15.81	0.103898	0.0608003
9.858	0.0616682	0.0358277		15.903	0.104204	0.0597994
9.951	0.0623259	0.03637		15.996	0.104081	0.0601312
10.044	0.0628199	0.0367706		16.089	0.1036	0.0593339
10.137	0.0631965	0.0371453		16.182	0.101614	0.0592792
10.23	0.0630646	0.0377868		16.275	0.097476	0.0561998
10.323	0.0637164	0.0387189		16.368	0.096795	0.0577464
10.416	0.0642367	0.0400324		16.461	0.0941373	0.0601519
10.509	0.064413	0.0402284		16.554	0.0942669	0.0652716
10.602	0.0650271	0.0405501		16.647	0.0949016	0.0680669
10.695	0.0650773	0.0410191		16.74	0.0966807	0.0719213
10.788	0.0651985	0.041638		16.833	0.0958406	0.0710758
10.881	0.0649077	0.0416519		16.926	0.0956252	0.0707007
10.974	0.0647642	0.0423447		17.019	0.0973932	0.0706902
11.067	0.0649867	0.0431633		17.112	0.100474	0.0723319
11.16	0.0655628	0.0442878		17.205	0.10371	0.0746786
11.253	0.066087	0.0451323		17.298	0.0996239	0.0689846
11.346	0.0667197	0.0464331		17.391	0.102136	0.0709879
11.439	0.0676862	0.047856		17.484	0.104929	0.0735448
11.532	0.0687667	0.0484378		17.577	0.10512	0.0703266
11.625	0.0694491	0.0479107		17.67	0.104883	0.0705571
11.718	0.071001	0.047433		17.763	0.10571	0.0697809
11.811	0.071915	0.0472459		17.856	0.106401	0.0692288
11.904	0.0731954	0.0477563		17.949	0.100497	0.0656421
11.997	0.0739397	0.0481893		18.042	0.0990356	0.0648673
12.09	0.0740945	0.0482093		18.135	0.0962871	0.066272
12.183	0.0737122	0.0475814		18.228	0.0948525	0.0670921
12.276	0.0731534	0.0475515		18.321	0.0939496	0.0686071
12.369	0.0722714	0.0471832		18.414	0.0923871	0.0711208
12.462	0.071659	0.0469502		18.507	0.09448	0.0717952
12.555	0.0711021	0.0455885		18.6	0.102087	0.0738351
12.648	0.0698546	0.0438183		18.693	0.103063	0.0769625
12.741	0.0687667	0.0429805		18.786	0.105122	0.0790459
12.834	0.0683025	0.0429116		18.879	0.107944	0.0737189
12.927	0.0671599	0.042882		18.972	0.112839	0.0711579
13.02	0.0664476	0.0429312		19.065	0.115797	0.0692786
13.113	0.0661078	0.0438115		19.158	0.118982	0.0691187
13.206	0.0662628	0.0452103		19.251	0.120787	0.0702653
13.299	0.0666945	0.0459541		19.344	0.127159	0.0737293
13.392	0.0657777	0.0467572		19.437	0.112389	0.0694943
13.485	0.0664755	0.0475035		19.53	0.117611	0.0743122
13.578	0.0676104	0.0489562		19.623	0.112959	0.0802622
13.671	0.0684655	0.0501338		19.716	0.111958	0.0891652
13.764	0.0691567	0.0518843		19.809	0.0805029	0.0285073
13.857	0.069981	0.0530543		19.902	0.0825029	0.0345176
13.95	0.0677318	0.0447592		19.995	0.0845029	0.0422075
14.043	0.0673959	0.0435054		20.088	0.0799317	0.0512057
14.136	0.0681073	0.043147		20.181	0.0838	0.0571891
14.229	0.0680476	0.0433746		20.274	0.0876683	0.0636037
14.322	0.0686036	0.0435964		20.367	0.0915367	0.0703316
14.415	0.0689595	0.0424427		20.46	0.101486	0.0833475
14.508	0.0693334	0.0416056
14.601	0.0697857	0.0414929
14.694	0.0703645	0.0419838
14.787	0.0710063	0.0431725
14.88	0.0710961	0.0444158
14.973	0.0705745	0.0455252
15.066	0.0703866	0.0470019
15.159	0.0702938	0.0479307
15.252	0.0708183	0.0490911
15.345	0.0684441	0.0441165
15.438	0.0686276	0.0427581
15.531	0.069176	0.0420092
15.624	0.0696129	0.041831
15.717	0.0693659	0.041666
15.81	0.0701099	0.0420992
15.903	0.0714873	0.0428106
15.996	0.072462	0.0435094
16.089	0.0737586	0.0447512
16.182	0.0746045	0.0463262
16.275	0.0751297	0.0469089
16.368	0.0740302	0.0463678
16.461	0.074623	0.0464608
16.554	0.0747469	0.0471769
16.647	0.0754078	0.0481848
16.74	0.0760593	0.0495733
16.833	0.0758635	0.0504897
16.926	0.0760326	0.0516769
17.019	0.0761338	0.0530988
17.112	0.0767732	0.0542901
17.205	0.0773681	0.0551479
17.298	0.077898	0.0546387
17.391	0.0742224	0.0500912
17.484	0.0735583	0.0474279
17.577	0.0730711	0.0448675
17.67	0.0727662	0.0427946
17.763	0.0723624	0.0406261
17.856	0.0720912	0.0393605
17.949	0.0716212	0.0388493
18.042	0.0699262	0.0382854
18.135	0.070405	0.037853
18.228	0.0705091	0.037584
18.321	0.06916	0.0360297
18.414	0.0691347	0.0372018
18.507	0.0686216	0.0374959
18.6	0.067817	0.0377344
18.693	0.0679122	0.0386366
18.786	0.0682016	0.0402908
18.879	0.0687803	0.0422377
18.972	0.0689775	0.0444993
19.065	0.0690535	0.0419486
19.158	0.0689919	0.0403305
19.251	0.0692135	0.0395562
19.344	0.0697186	0.0397496
19.437	0.0705606	0.0409694
19.53	0.0718595	0.0427558
19.623	0.0719376	0.0414072
19.716	0.0717792	0.0408755
19.809	0.0718541	0.0410928
19.902	0.0716648	0.0411236
19.995	0.0722867	0.0397385
20.088	0.0729318	0.0393081
20.181	0.0734611	0.0390325
20.274	0.0736468	0.0390805
20.367	0.0741025	0.0399195
20.46	0.0741584	0.0412495
20.553	0.0743439	0.0432874
20.646	0.0752713	0.0455729
20.739	0.0755775	0.0466479
20.832	0.0761149	0.0474068
20.925	0.0759438	0.0465843
21.018	0.075331	0.045902
21.111	0.0751359	0.0454957
21.204	0.0752184	0.0455194
21.297	0.0749536	0.0460324
21.39	0.0752857	0.0460355
21.483	0.0749168	0.0458036
21.576	0.074745	0.0464779
21.669	0.0731209	0.0426827
21.762	0.0714364	0.0426254
21.855	0.07263	0.0425927
21.948	0.0748173	0.0425965
22.041	0.0768689	0.0432785
22.134	0.0788387	0.0447462
22.227	0.0807658	0.0461674
22.32	0.0825231	0.0473343
22.413	0.08409	0.0493468
22.506	0.085034	0.050804
22.599	0.0855576	0.0528629
22.692	0.0863742	0.0547311
22.785	0.0862793	0.0546124
22.878	0.0859067	0.0542924
22.971	0.0852987	0.0540829
23.064	0.0844678	0.053812
23.157	0.0833038	0.0540036
23.25	0.0824164	0.0544156
23.343	0.0819229	0.0542152
23.436	0.0820916	0.054691
23.529	0.082158	0.05581
23.622	0.0816467	0.0569963
23.715	0.0808714	0.0557446
23.808	0.0797142	0.0527886
23.901	0.0785667	0.050722
23.994	0.0782398	0.049077
24.087	0.0786885	0.0483767
24.18	0.0794166	0.0485022
24.273	0.0787467	0.0491861
24.366	0.0785854	0.0495299
24.459	0.0787243	0.0510015
24.552	0.0794183	0.0532063
24.645	0.078124	0.049986
24.738	0.0797998	0.0503939
24.831	0.081676	0.0513742
24.924	0.0824883	0.0496882
25.017	0.0825215	0.0477618
25.11	0.0819966	0.046214
25.203	0.0797148	0.0438964
25.296	0.0797367	0.0432558
25.389	0.0795808	0.0429142
25.482	0.0796388	0.0432414
25.575	0.0794796	0.0425657
25.668	0.0795145	0.0423747
25.761	0.0796686	0.0430684
25.854	0.0805453	0.0454839
25.947	0.0822622	0.0479817
26.04	0.0844447	0.050964
26.133	0.0866765	0.0544007
26.226	0.0884112	0.0576508
26.319	0.0903318	0.0615221
26.412	0.0889922	0.0621586
26.505	0.0892615	0.062936
26.598	0.0852106	0.0569167
26.691	0.0854943	0.0562955
26.784	0.0853891	0.054745
26.877	0.0848939	0.0518656
26.97	0.0840291	0.049206
27.063	0.0834309	0.0471104
27.156	0.0826769	0.0454545
27.249	0.0813431	0.0442934
27.342	0.0801118	0.0445943
27.435	0.0814252	0.0441481
27.528	0.0809543	0.0453149
27.621	0.0794423	0.0431365
27.714	0.0764358	0.0416723
27.807	0.0751909	0.0399699
27.9	0.0737733	0.0389232
27.993	0.0720131	0.0383147
28.086	0.0712152	0.0384299
28.179	0.07173	0.0382703
28.272	0.0716777	0.0398346
28.365	0.072288	0.0383425
28.458	0.0729967	0.0370858
28.551	0.0750782	0.036031
28.644	0.0773292	0.0363647
28.737	0.0793646	0.0374533
28.83	0.0814749	0.0396892
28.923	0.0837674	0.0430228
29.016	0.0855151	0.0463781
29.109	0.0870292	0.0505296
29.202	0.0881746	0.0551551
29.295	0.0888697	0.0575285
29.388	0.0895408	0.0605852
29.481	0.0892182	0.0600796
29.574	0.0891005	0.0597521
29.667	0.0894774	0.0600593
29.76	0.0889908	0.0599708
29.853	0.0827576	0.0497759
29.946	0.0828457	0.048341
30.039	0.0827078	0.0476024
30.132	0.0831922	0.0476693
30.225	0.0841908	0.0475664
30.318	0.0807197	0.0409995
30.411	0.0820375	0.0447173
30.504	0.0832897	0.0495838
30.597	0.0846228	0.0541268
30.69	0.0879417	0.0587558
30.783	0.0906211	0.0634887
30.876	0.0861376	0.0553708
30.969	0.0900564	0.0593037
31.062	0.0913588	0.0620799
31.155	0.0948448	0.0615196
31.248	0.0956345	0.0606324
31.341	0.0964242	0.0606306
31.434	0.0927586	0.0471825
31.527	0.0930711	0.0463569
31.62	0.0928585	0.0467475
31.713	0.0902908	0.0489456
31.806	0.0897904	0.0512075
31.899	0.08929	0.0543346
31.992	0.091823	0.0594978
32.085	0.0944154	0.06459
32.178	0.0972427	0.0661162
32.271	0.10007	0.0681344
32.364	0.102897	0.0706024
32.457	0.106639	0.072541
32.55	0.096926	0.065204
32.643	0.099769	0.0670438
32.736	0.102612	0.0691672
32.829	0.105455	0.0715492
32.922	0.108298	0.0741647
33.015	0.0890829	0.051942
33.108	0.09541	0.0491511
33.201	0.0935567	0.0469327
33.294	0.0917033	0.0451632
33.387	0.0911683	0.0425115
33.48	0.0901133	0.039797
33.573	0.0890583	0.0379756
33.666	0.0880033	0.0371788
33.759	0.0869483	0.0374719
33.852	0.0858933	0.0388304
33.945	0.0859417	0.0353362
34.038	0.08599	0.0326445
34.131	0.0860383	0.030965
34.224	0.0860867	0.0304658
34.317	0.08344	0.0275537
34.41	0.08199	0.0275404
34.503	0.08054	0.0287738
34.596	0.07909	0.031106
34.689	0.07764	0.0343137
34.782	0.07619	0.0381768
34.875	0.082784	0.0376314
34.968	0.08424	0.0368812
35.061	0.085696	0.0377211
35.154	0.087152	0.040051

## Sheet: ANOVA (# molecules)
One -way ANOVA at time 0s
Significance level	α =	0.05
	mean	stdev	N
WT protoplast 1.2 M	851.377	255.924	143
WT protoplast 0.8 M	846.405	189.24	151
WT protoplast 0.4 M	1000.2	267.07	682
WT protoplast 0.25 M	1239.05	427.233	395
WT walled cells 0M	815.365	188.812	234
						ANOVA between protoplast 1.2 M and walled cells 0M	ANOVA between protoplast 0.8 M and walled cells 0M	ANOVA between protoplast 0.4 M and walled cells 0M	ANOVA between protoplast 0.25 M and walled cells 0M
Overall mean	m=	1004.3				829.025	827.539	952.981	1081.43
Between-group degrees of freedom	dfb=	4				1	1	1	1
Between-group mean square value	MSb=	9.31005e+06				115108	88423.4	5.95199e+06	2.63781e+07
Within-group degrees of freedom	dfw=	1600				375	383	914	627
Within-group mean square value	MSw=	89667.7				46952	35713.4	62231.8	127947
F-ratio	F=	103.828				2.45161	2.47592	95.6423	206.165
Critical value	Fcrit=	2.37749				3.86638	3.86585	3.85165	3.85633
p-value	p=	0				0.118248	0.116428	0	0
There is a statistically significant difference between conditions						The difference between protoplast at 1.2 M and walled cells at 0 M is not statistically significant	The difference between protoplast at 0.8 M and walled cells at 0 M is not statistically significant	The difference between protoplast at 0.4 M and walled cells at 0 M is statistically significant	The difference between protoplast at 0.25 M and walled cells at 0 M is statistically significant
