# Supplementary material for: Rapid adaptation of endocytosis, exocytosis, and eisosomes after an acute increase in membrane tension in yeast cells
Source: eLife. 2021 May 13;10:e62084. doi: 10.7554/eLife.62084 (PMC9045820; doi:10.7554/eLife.62084)
Supplement: Figure 7—figure supplement 1—source data 2. [file elife-62084-fig7-figsupp1-data2.xlsx]

## Sheet: Number of molecules
pil1Δ				pil1Δ				pil1Δ				pil1Δ				WT
Protoplasts				Protoplasts				Protoplasts				Protoplasts				Walled cells
steady state in 1.2M sorbitol				steady state in 0.8M sorbitol				steady state in 0.4M sorbitol				steady state in 0.25M sorbitol				steady state in 0M sorbitol
N=	203			N=	184			N=	342			N=	370			N=	300
Number of molecules (#)				Number of molecules (#)				Number of molecules (#)				Number of molecules (#)				Number of molecules (#)
time	mean	stdev		time	mean	stdev		time	mean	stdev		time	mean	stdev		time	mean	stdev
-11.997	209.104	202.37		-13.485	329.236	209.458		-7.533	176.654	119.468		-5.58	136.079	174.203		-8.277	132.269	65.5852
-11.904	197.763	192.46		-13.392	318.091	207.337		-7.44	183.775	118.445		-5.487	147.596	173.39		-8.184	137.998	66.7014
-11.811	196.701	188.293		-13.299	317.16	205.118		-7.347	189.599	116.311		-5.394	162.756	175.266		-8.091	137.994	67.6295
-11.718	196.993	185.986		-13.206	314.461	201.218		-7.254	195.91	114.64		-5.301	165.844	162.896		-7.998	143.468	67.8372
-11.625	196.319	177.774		-13.113	305.837	195.86		-7.161	194.864	111.619		-5.208	164.551	136.666		-7.905	147.537	64.5114
-11.532	199.055	175.828		-13.02	309.042	194.782		-7.068	203.158	110.195		-5.115	174.585	130.272		-7.812	153.154	62.2672
-11.439	202.702	174.678		-12.927	309.463	192.817		-6.975	208.49	111.207		-5.022	199.589	174.747		-7.719	157.513	63.1147
-11.346	205.531	172.837		-12.834	310.483	190.632		-6.882	218.006	110.667		-4.929	210.23	169.933		-7.626	158.173	62.5212
-11.253	206.869	170.75		-12.741	313.783	189.743		-6.789	224.701	110.916		-4.836	214.719	163.051		-7.533	162.449	62.7524
-11.16	207.765	166.167		-12.648	314.483	188.257		-6.696	230.34	107.87		-4.743	214.822	153.055		-7.44	161.458	61.0181
-11.067	217.905	169.611		-12.555	317.784	187.765		-6.603	239.758	108.562		-4.65	224.396	149.258		-7.347	166.708	65.483
-10.974	221.074	168.06		-12.462	315.206	186.857		-6.51	246.627	110.25		-4.557	254.694	192.447		-7.254	172.652	65.0083
-10.881	224.264	165.812		-12.369	316.306	186.529		-6.417	253.748	110.838		-4.464	265.069	187.879		-7.161	178.941	65.2573
-10.788	226.809	163.756		-12.276	317.8	186.083		-6.324	258.418	110.62		-4.371	278.755	183.477		-7.068	187.312	67.5807
-10.695	227.807	159.467		-12.183	308.017	184.966		-6.231	263.696	110.776		-4.278	290.591	178.242		-6.975	194.197	68.2921
-10.602	231.196	158.225		-12.09	312.415	185.11		-6.138	273.295	110.517		-4.185	309.564	177.499		-6.882	196.219	69.2913
-10.509	235.171	156.687		-11.997	313.826	185.295		-6.045	279.046	112.799		-4.092	328.769	176.691		-6.789	199.525	71.119
-10.416	240.049	155.101		-11.904	318.258	185.52		-5.952	286.307	114.056		-3.999	346.974	177.133		-6.696	203.816	71.6985
-10.323	243.725	153.936		-11.811	322.74	185.797		-5.859	295.873	113.802		-3.906	366.889	177.637		-6.603	207.994	72.7329
-10.23	245.629	152.244		-11.718	324.127	184.244		-5.766	308.392	112.29		-3.813	388.894	177.019		-6.51	211.692	72.8815
-10.137	251.183	150.303		-11.625	332.515	181.048		-5.673	321.848	112.457		-3.72	412.51	179.404		-6.417	215.808	74.3658
-10.044	255.886	149.439		-11.532	334.384	180.851		-5.58	336.295	113.964		-3.627	433.966	180.982		-6.324	223.392	75.5573
-9.951	261.009	149.093		-11.439	335.99	181.207		-5.487	346.397	114.687		-3.534	456.463	182.302		-6.231	228.598	77.4587
-9.858	264.502	147.892		-11.346	333.236	180.798		-5.394	360.716	114.66		-3.441	480.193	182.592		-6.138	233.877	78.8662
-9.765	267.837	146.782		-11.253	327.94	178.906		-5.301	375.03	114.274		-3.348	503.612	183.305		-6.045	242.08	79.3393
-9.672	269.907	146.096		-11.16	332.81	178.302		-5.208	396.873	135.751		-3.255	529.356	183.893		-5.952	247.3	82.2426
-9.579	275.528	145.267		-11.067	332.38	178.575		-5.115	410.465	136.201		-3.162	552.639	185.962		-5.859	255.188	84.7519
-9.486	281.119	144.513		-10.974	338.022	176.936		-5.022	424.456	135.916		-3.069	576.392	186.582		-5.766	262.402	87.5785
-9.393	287.096	143.339		-10.881	343.287	175.427		-4.929	439.193	136.031		-2.976	600.352	187.561		-5.673	269.644	88.798
-9.3	290.531	142.737		-10.788	348.225	175.152		-4.836	454.027	136.342		-2.883	626.202	188.851		-5.58	279.631	90.229
-9.207	298.733	145.295		-10.695	354.208	175.218		-4.743	472.132	137.406		-2.79	653.567	191.577		-5.487	285.156	93.2253
-9.114	308.584	158.482		-10.602	345.46	179.125		-4.65	486.834	138.084		-2.697	682.569	205.047		-5.394	294.262	94.3458
-9.021	314.058	157.246		-10.509	346.939	180.168		-4.557	501.632	139.21		-2.604	708.172	205.064		-5.301	302.654	95.4318
-8.928	319.448	156.044		-10.416	345.769	178.434		-4.464	515.025	139.926		-2.511	734.343	206.026		-5.208	311.934	96.8546
-8.835	324.781	154.988		-10.323	348.019	177.261		-4.371	529.514	139.888		-2.418	760.518	207.548		-5.115	322.481	97.8839
-8.742	330.345	153.862		-10.23	352.951	176.733		-4.278	545.372	141.385		-2.325	787.572	209.81		-5.022	333.219	99.6697
-8.649	332.86	153.776		-10.137	357.883	176.31		-4.185	557.08	144.376		-2.232	811.5	212.429		-4.929	341.016	102.502
-8.556	337.916	152.368		-10.044	359.298	175.744		-4.092	572.048	145.149		-2.139	837.915	215.187		-4.836	351.291	104.093
-8.463	343.508	151.475		-9.951	364.17	175.443		-3.999	587.638	146.143		-2.046	863.541	217.859		-4.743	362.441	104.835
-8.37	347.394	150.515		-9.858	370.062	174.838		-3.906	603.212	147.555		-1.953	888.413	220.471		-4.65	373.277	105.929
-8.277	357.868	157.828		-9.765	379.603	178.863		-3.813	618.71	149.151		-1.86	912.554	223.655		-4.557	384.967	110.702
-8.184	363.683	156.818		-9.672	380.586	178.696		-3.72	634.722	150.684		-1.767	936.061	226.736		-4.464	395.136	112.162
-8.091	368.671	155.731		-9.579	385.483	177.915		-3.627	650.679	152.63		-1.674	959.472	230.299		-4.371	405.211	113.696
-7.998	374.521	154.869		-9.486	390.476	177.148		-3.534	666.739	154.97		-1.581	982.349	233.508		-4.278	415.218	115.212
-7.905	379.216	154.081		-9.393	388.259	178.998		-3.441	683.257	157.78		-1.488	1003.33	236.471		-4.185	425.982	116.361
-7.812	385.122	153.214		-9.3	392.11	177.829		-3.348	701.904	162.041		-1.395	1022.92	239.953		-4.092	436.252	117.047
-7.719	395.23	160.311		-9.207	405.507	196.701		-3.255	715.865	166.77		-1.302	1044.14	245.822		-3.999	445.877	118.297
-7.626	401.055	159.307		-9.114	405.398	197.715		-3.162	731.761	170.613		-1.209	1061.51	249.874		-3.906	456.502	119.096
-7.533	406.866	158.415		-9.021	410.482	196.679		-3.069	747.082	174.282		-1.116	1077.92	254.03		-3.813	467.23	119.679
-7.44	411.727	157.53		-8.928	413.954	195.702		-2.976	762.355	178.244		-1.023	1092.84	258.4		-3.72	478.561	120.653
-7.347	418.67	158.088		-8.835	419.119	194.831		-2.883	777.259	182.306		-0.93	1106.09	262.546		-3.627	489.928	121.648
-7.254	425.483	159.638		-8.742	423.011	194.214		-2.79	791.55	185.835		-0.837	1116.92	267.543		-3.534	500.931	123.274
-7.161	433.533	160.455		-8.649	428.439	193.5		-2.697	806.434	188.006		-0.744	1125.95	272.388		-3.441	513.097	124.44
-7.068	439.243	159.311		-8.556	431.435	193.456		-2.604	820.141	191.451		-0.651	1134.88	276.694		-3.348	525.572	125.347
-6.975	445.272	158.76		-8.463	434.542	192.355		-2.511	832.897	194.741		-0.558	1143.36	280.781		-3.255	538.06	126.68
-6.882	451.38	158.449		-8.37	441.84	191.946		-2.418	845.327	198.37		-0.465	1151.39	284.545		-3.162	550.595	128.114
-6.789	459.191	158.891		-8.277	446.117	191.447		-2.325	866.045	210.652		-0.372	1155.76	287.344		-3.069	562.876	130.375
-6.696	465.377	158.974		-8.184	451.975	191.132		-2.232	877.32	212.4		-0.279	1159.94	290.916		-2.976	576.094	132.435
-6.603	471.52	159.217		-8.091	457.834	190.95		-2.139	887.456	217.29		-0.186	1164.68	295.145		-2.883	589.193	134.253
-6.51	477.644	159.364		-7.998	459.733	192.249		-2.046	897.799	220.461		-0.093	1167.52	298.07		-2.79	602.22	136.413
-6.417	483.709	159.671		-7.905	467.646	193.01		-1.953	907.487	223.927		0	1168.05	302.08		-2.697	615.487	138.721
-6.324	489.52	159.388		-7.812	470.998	193.679		-1.86	905.397	239.834		0.093	1162.25	314.329		-2.604	627.16	141.026
-6.231	495.447	159.038		-7.719	477.102	193.363		-1.767	913.872	241.649		0.186	1163.88	315.808		-2.511	639.775	143.129
-6.138	501.503	158.926		-7.626	483.192	193.011		-1.674	921.297	243.08		0.279	1163.13	318.934		-2.418	652.292	145.278
-6.045	507.688	158.906		-7.533	490.582	192.588		-1.581	928.267	244.986		0.372	1162.31	320.858		-2.325	664.629	147.325
-5.952	513.802	158.774		-7.44	496.18	191.719		-1.488	929.799	246.923		0.465	1162.93	321.925		-2.232	676.772	149.228
-5.859	519.835	158.854		-7.347	496.767	195.347		-1.395	936.033	247.286		0.558	1160.54	329.44		-2.139	689.995	153.237
-5.766	526.059	159.136		-7.254	503.054	195.177		-1.302	940.169	246.647		0.651	1158.46	329.536		-2.046	701.67	154.904
-5.673	532.321	159.565		-7.161	509.515	195.086		-1.209	943.16	247.553		0.744	1157.87	331.047		-1.953	713.176	156.749
-5.58	538.629	160.337		-7.068	513.154	193.899		-1.116	946.845	247.789		0.837	1156.1	331.091		-1.86	724.016	158.222
-5.487	546.066	160.327		-6.975	519.431	193.203		-1.023	950.639	249.775		0.93	1153.61	333.546		-1.767	734.326	159.755
-5.394	552.036	160.597		-6.882	525.435	192.341		-0.93	954.412	255.535		1.023	1132.63	351.577		-1.674	741.59	165.481
-5.301	558.181	161.182		-6.789	531.401	191.283		-0.837	956.235	254.994		1.116	1127.27	350.061		-1.581	751.05	166.71
-5.208	564.098	161.517		-6.696	537.299	190.407		-0.744	959.125	255.066		1.209	1121.96	349.865		-1.488	760.013	167.93
-5.115	569.931	161.996		-6.603	542.859	189.374		-0.651	960.136	254.589		1.302	1119.21	348.912		-1.395	768.292	169.276
-5.022	574.395	162.325		-6.51	548.002	188.369		-0.558	966.927	254.842		1.395	1113.99	343.615		-1.302	776.108	170.845
-4.929	582.625	165.464		-6.417	553.074	187.455		-0.465	964.166	253.495		1.488	1098.12	347.967		-1.209	783.773	172.637
-4.836	588.067	165.69		-6.324	558.422	185.763		-0.372	963.061	252.781		1.581	1093.12	344.969		-1.116	790.073	174.195
-4.743	593.443	166.071		-6.231	563.659	184.206		-0.279	961.727	254.445		1.674	1087.74	342.806		-1.023	795.773	175.764
-4.65	598.669	166.263		-6.138	567.559	182.098		-0.186	960.253	254.091		1.767	1082.22	340.483		-0.93	801.009	177.162
-4.557	603.959	166.521		-6.045	573.366	181.038		-0.093	958.795	255.783		1.86	1076.21	336.931		-0.837	805.582	178.109
-4.464	610.048	167.076		-5.952	582.046	182.033		0	967.886	259.688		1.953	1049.52	355.086		-0.744	800.841	185.103
-4.371	614.841	167.424		-5.859	586.925	181.043		0.093	965.379	261.051		2.046	1045.3	351.884		-0.651	803.655	184.838
-4.278	619.827	168.167		-5.766	593.13	180.34		0.186	962.896	261.601		2.139	1040.82	348.425		-0.558	806.321	184.933
-4.185	624.825	169.095		-5.673	599.579	179.642		0.279	960.201	260.917		2.232	1035.88	347.69		-0.465	809.029	185.03
-4.092	630.086	170.174		-5.58	606.683	178.881		0.372	954.894	260.891		2.325	1031.36	346.733		-0.372	812.236	185.484
-3.999	633.999	171.495		-5.487	616.788	185.624		0.465	936.945	271.45		2.418	1022.81	347.434		-0.279	814.116	185.965
-3.906	639.277	172.982		-5.394	622.369	185.961		0.558	933.474	267.986		2.511	1016.64	343.711		-0.186	815.491	186.804
-3.813	644.523	174.621		-5.301	629.771	185.985		0.651	930.091	266.038		2.604	1010.6	340.106		-0.093	816.565	187.74
-3.72	649.721	176.295		-5.208	637.067	186.034		0.744	926.332	264.127		2.697	1004.05	337.348		0	816.85	188.359
-3.627	654.149	176.915		-5.115	645.722	186.32		0.837	919.224	258.971		2.79	997.08	335.391		0.093	816.78	189.079
-3.534	661.062	178.916		-5.022	657.443	192.622		0.93	915.47	257.049		2.883	968.527	351.499		0.186	815.505	188.956
-3.441	665.927	180.329		-4.929	666.112	192.275		1.023	910.703	255.445		2.976	961.776	347.496		0.279	813.93	189.167
-3.348	670.432	181.565		-4.836	673.249	191.835		1.116	905.983	251.379		3.069	954.729	343.053		0.372	812.12	189.264
-3.255	675.348	182.398		-4.743	680.349	191.689		1.209	900.433	248.939		3.162	947.76	340.265		0.465	809.656	189.345
-3.162	678.557	183.893		-4.65	686.8	191.605		1.302	897.271	245.815		3.255	937.777	330.67		0.558	807.067	189.562
-3.069	687.217	188.246		-4.557	698.158	197.935		1.395	885.255	245.403		3.348	928.759	328.587		0.651	803.84	189.481
-2.976	691.916	188.998		-4.464	704.509	197.389		1.488	879.251	241.974		3.441	922.196	324.625		0.744	800.584	189.511
-2.883	695.716	190.128		-4.371	710.746	197.03		1.581	873.916	237.827		3.534	915.128	321.757		0.837	796.832	189.551
-2.79	699.385	191.298		-4.278	718.237	196.746		1.674	869.251	235.089		3.627	908.104	319.106		0.93	792.096	189.659
-2.697	703.626	192.323		-4.185	725.161	196.024		1.767	864.286	233.784		3.72	901.727	315.996		1.023	788.326	189.186
-2.604	706.512	194.076		-4.092	730.927	196.365		1.86	859.252	231.941		3.813	888.505	318.84		1.116	783.062	187.873
-2.511	709.639	194.85		-3.999	736.429	196.672		1.953	853.88	230.212		3.906	881.104	315.594		1.209	777.412	186.781
-2.418	712.713	195.592		-3.906	742.039	197.274		2.046	848.985	228.252		3.999	874.654	312.998		1.302	771.522	185.844
-2.325	715.568	196.396		-3.813	747.549	198.041		2.139	845.252	226.719		4.092	868.312	310.432		1.395	765.565	184.988
-2.232	716.897	196.699		-3.72	753.6	198.754		2.232	839.545	225.031		4.185	854.841	302.96		1.488	760.24	184.167
-2.139	719.329	197.23		-3.627	759.6	199.836		2.325	829.868	221.851		4.278	848.285	303.661		1.581	754.095	182.888
-2.046	721.908	197.986		-3.534	765.388	201.181		2.418	823.086	219.197		4.371	841.067	301.837		1.674	747.776	181.645
-1.953	724.561	198.81		-3.441	771.136	202.637		2.511	817.093	216.664		4.464	833.844	299.748		1.767	741.548	180.784
-1.86	727.225	199.997		-3.348	776.768	204.203		2.604	811.306	214.46		4.557	829.446	298.393		1.86	735.362	179.342
-1.767	724.234	196.183		-3.255	782.398	205.987		2.697	804.989	213.395		4.65	824.128	295.376		1.953	730.803	176.102
-1.674	727.284	198.475		-3.162	788.836	207.681		2.79	797.892	213.984		4.743	814.847	296.01		2.046	724.053	174.37
-1.581	728.958	199.614		-3.069	794.261	208.672		2.883	791.987	214.072		4.836	807.374	292.06		2.139	717.282	172.815
-1.488	730.414	200.697		-2.976	799.259	209.218		2.976	786.174	214.23		4.929	800.091	289.848		2.232	710.49	171.887
-1.395	731.864	201.897		-2.883	804.267	209.297		3.069	779.39	215.369		5.022	790.944	287.078		2.325	703.187	170.347
-1.302	733.411	203.409		-2.79	809.015	208.949		3.162	773.614	216.005		5.115	785.605	283.834		2.418	694.955	168.675
-1.209	734.801	204.813		-2.697	813.628	208.763		3.255	762.879	217.979		5.208	773.954	286.644		2.511	687.143	167.16
-1.116	736.833	205.905		-2.604	817.969	208.182		3.348	757.543	218.33		5.301	765.604	282.422		2.604	679.085	165.679
-1.023	738.111	207.575		-2.511	822.39	207.79		3.441	751.629	217.758		5.394	758.333	278.699		2.697	670.868	164.364
-0.93	739.632	208.655		-2.418	826.942	207.639		3.534	744.304	217.561		5.487	749.723	276.062		2.79	661.806	163.175
-0.837	739.678	209.378		-2.325	830.887	207.522		3.627	734.045	206.269		5.58	742.99	272.036		2.883	651.909	160.633
-0.744	742.221	210.715		-2.232	834.287	206.81		3.72	726.167	202.508		5.673	736.89	268.8		2.976	643.258	158.757
-0.651	743.355	211.541		-2.139	837.708	206.448		3.813	719.275	199.635		5.766	729.037	266.113		3.069	634.388	157.061
-0.558	744.522	212.463		-2.046	841.301	206.633		3.906	711.808	196.918		5.859	721.733	264.031		3.162	625.673	155.431
-0.465	745.457	213.513		-1.953	844.717	206.985		3.999	704.674	194.427		5.952	714.189	261.841		3.255	616.625	154.1
-0.372	744.767	213.887		-1.86	847.295	208.176		4.092	698.153	191.44		6.045	706.849	259.856		3.348	605.536	149.539
-0.279	745.557	214.342		-1.767	850.086	209.648		4.185	688.609	188.66		6.138	703.102	259.056		3.441	596.901	148.268
-0.186	746.155	214.853		-1.674	852.946	211.391		4.278	682.277	185.618		6.231	695.272	258.192		3.534	588.16	147.082
-0.093	746.635	215.384		-1.581	855.323	213.174		4.371	674.705	183.115		6.324	688.072	256.48		3.627	579.535	145.735
0	746.979	216.068		-1.488	857.254	214.498		4.464	666.844	180.855		6.417	681.106	254.957		3.72	570.591	144.658
0.093	744.985	216.42		-1.395	856.024	217.383		4.557	658.908	178.972		6.51	677.701	253.207		3.813	562.719	144.317
0.186	744.914	218.291		-1.302	861.966	220.795		4.65	651.021	179.393		6.603	672.299	252.749		3.906	555.217	142.894
0.279	744.336	220.188		-1.209	865.044	222.185		4.743	643.013	179.04		6.696	664.322	250.006		3.999	546.529	141.374
0.372	743.932	221.302		-1.116	867.767	223.439		4.836	635.381	178.72		6.789	657.071	248.795		4.092	538.04	140.286
0.465	742.638	222.716		-1.023	869.265	225.083		4.929	626.601	179.39		6.882	648.949	245.821		4.185	530.226	138.969
0.558	741.349	222.65		-0.93	871.709	226.342		5.022	618.517	178.892		6.975	638.66	243.405		4.278	522.502	137.776
0.651	740.869	223.842		-0.837	871.031	234.887		5.115	607.984	175.653		7.068	630.14	241.792		4.371	514.21	137.223
0.744	740.381	225.143		-0.744	872.437	234.845		5.208	599.792	175.228		7.161	621.484	239.803		4.464	505.477	136.324
0.837	739.508	225.882		-0.651	875.063	234.627		5.301	591.683	175.441		7.254	612.849	238.184		4.557	496.669	134.99
0.93	739.226	227.186		-0.558	876.552	235.124		5.394	584.181	175.047		7.347	604.12	237.319		4.65	487.615	134.223
1.023	733.092	224.811		-0.465	874.928	237.972		5.487	579.354	172.365		7.44	596.756	235.97		4.743	478.72	132.951
1.116	731.437	226.197		-0.372	875.646	240.671		5.58	570.37	169.183		7.533	584.479	234.979		4.836	471.487	130.476
1.209	729.989	226.819		-0.279	875.008	241.504		5.673	562.948	168.018		7.626	575.6	232.947		4.929	462.733	128.607
1.302	728.874	227.653		-0.186	875.596	241.722		5.766	555.867	166.887		7.719	567.451	230.261		5.022	454.188	127.491
1.395	727.437	228.637		-0.093	876.205	242.071		5.859	549.02	165.827		7.812	558.332	227.655		5.115	445.697	125.804
1.488	723.785	227.913		0	879.254	238.927		5.952	542.22	165.041		7.905	555.076	223.343		5.208	437.772	124.26
1.581	722.144	228.292		0.093	871.401	246.311		6.045	535.246	164.263		7.998	547.966	221.156		5.301	430.827	122.015
1.674	720.605	228.527		0.186	871.765	246.062		6.138	527.993	163.525		8.091	539.642	219.461		5.394	422.723	120.639
1.767	718.943	228.874		0.279	870.666	246.153		6.231	520.658	162.125		8.184	532.084	217.532		5.487	414.995	119.633
1.86	717.074	229.339		0.372	870.355	244.72		6.324	512.936	161.61		8.277	524.363	215.959		5.58	407.31	118.507
1.953	718.255	228.913		0.465	870.175	243.802		6.417	505.422	161.286		8.37	516.965	214.43		5.673	401.781	117.274
2.046	718.119	228.494		0.558	871.407	242.472		6.51	501.495	161.96		8.463	515.18	213.239		5.766	394.199	117.894
2.139	718.542	228.123		0.651	871.104	241.348		6.603	494.46	161.7		8.556	507.143	211.901		5.859	386.841	117.077
2.232	717.477	226.993		0.744	871.287	239.819		6.696	488.005	162.016		8.649	503.593	210.753		5.952	379.491	116.228
2.325	716.649	225.739		0.837	869.549	239.522		6.789	480.717	161.699		8.742	496.821	210.219		6.045	374.974	114.616
2.418	716.054	225.036		0.93	869.373	239.473		6.882	473.381	161.563		8.835	493.943	207.845		6.138	367.546	113.641
2.511	717.189	223.784		1.023	863.74	242.515		6.975	467.591	161.536		8.928	486.683	208.109		6.231	360.56	113.234
2.604	716.414	223.57		1.116	863.128	243.206		7.068	461.942	159.941		9.021	479.115	208.612		6.324	353.114	112.203
2.697	715.54	223.452		1.209	862.047	243.967		7.161	455.125	158.171		9.114	470.087	208.283		6.417	346.456	111.418
2.79	714.9	223.371		1.302	861.614	244.142		7.254	448.6	157.304		9.207	461.918	207.104		6.51	339.047	110.746
2.883	714.445	223.459		1.395	860.849	244.409		7.347	441.802	155.782		9.3	459.988	202.535		6.603	332.697	108.275
2.976	709.784	223.279		1.488	859.491	244.932		7.44	436.523	155.25		9.393	452.036	203.756		6.696	327.208	105.688
3.069	708.642	223.694		1.581	858.532	245.643		7.533	428.813	153.019		9.486	446.512	202.888		6.789	319.346	103.744
3.162	707.649	224.193		1.674	857.588	246.116		7.626	421.049	150.91		9.579	439.678	202.413		6.882	311.541	101.841
3.255	706.203	224.902		1.767	858.098	246.478		7.719	416.298	147.132		9.672	443.447	198.154		6.975	305.868	100.135
3.348	704.445	224.944		1.86	856.833	246.256		7.812	408.521	145.203		9.765	434.906	198.259		7.068	299.25	97.908
3.441	702.755	225.725		1.953	834.253	268.161		7.905	399.521	142.07		9.858	430.024	197.241		7.161	293.753	95.9797
3.534	700.885	225.713		2.046	833.176	267.515		7.998	392.733	140.447		9.951	420.778	197.762		7.254	286.263	94.5959
3.627	699.336	225.671		2.139	832.249	266.911		8.091	385.457	138.103		10.044	412.762	198.309		7.347	280.971	92.8241
3.72	694.536	217.231		2.232	831.179	266.282		8.184	378.308	135.772		10.137	410.519	197.433		7.44	277.111	89.1121
3.813	692.656	217.226		2.325	827.577	266.596		8.277	371.13	133.584		10.23	403.974	197.393		7.533	269.63	87.4635
3.906	691.843	216.468		2.418	825.452	266.866		8.37	366.653	130.23		10.323	384.325	177.496		7.626	264.203	84.7025
3.999	689.395	216.021		2.511	824.075	265.579		8.463	360.154	128.174		10.416	376.73	176.789		7.719	258.212	84.3521
4.092	686.935	215.619		2.604	824.059	264.983		8.556	353.943	126.248		10.509	369.212	175.757		7.812	252.84	84.0314
4.185	686.477	214.774		2.697	822.808	263.977		8.649	349.949	124.711		10.602	369.862	170.479		7.905	249.296	82.4284
4.278	684.498	215.14		2.79	821.014	262.916		8.742	343.961	123.011		10.695	362.442	169.322		7.998	243.762	81.5883
4.371	682.558	215.516		2.883	811.181	269.503		8.835	338.752	122.844		10.788	362.236	166.447		8.091	243.926	80.6607
4.464	680.97	215.98		2.976	809.442	268.049		8.928	335.868	123.288		10.881	356.628	165.367		8.184	238.862	79.9429
4.557	679.246	216.431		3.069	806.47	267.406		9.021	332.339	121.063		10.974	352.952	165.675		8.277	234.122	79.5246
4.65	677.596	217.054		3.162	804.636	266.524		9.114	326.024	120.42		11.067	349.277	163.688		8.37	233.696	77.3663
4.743	676.045	217.583		3.255	800.496	266.236		9.207	319.851	119.91		11.16	341.905	162.512		8.463	227.191	77.0449
4.836	672.374	220.041		3.348	798.219	265.183		9.3	314.485	120.546		11.253	342.41	160.049		8.556	223.256	76.768
4.929	671.143	221.139		3.441	796.493	264.736		9.393	307.996	119.841		11.346	334.827	158.751		8.649	218.026	75.3588
5.022	669.33	220.848		3.534	794.286	263.497		9.486	302.699	119.014		11.439	332.811	156.321		8.742	215.732	71.853
5.115	665.348	219.7		3.627	791.802	262.187		9.579	300.068	116.423		11.532	329.237	153.815		8.835	210.29	70.2261
5.208	663.337	219.212		3.72	789.667	261.047		9.672	292.941	115.662		11.625	323.613	152.326		8.928	203.559	68.3599
5.301	656.754	222.735		3.813	779.079	268.464		9.765	284.091	116.009		11.718	322.213	149.324		9.021	200.455	67.5035
5.394	654.619	222.895		3.906	777.448	267.088		9.858	278.484	115.691		11.811	317.087	146.772		9.114	194.325	66.2646
5.487	651.733	222.451		3.999	776.525	265.016		9.951	272.857	115.468		11.904	312.646	145.74		9.207	189.257	65.4677
5.58	649.46	222.089		4.092	775.127	263.881		10.044	268.798	115.414		11.997	328.306	132.993		9.3	184.501	64.0845
5.673	646.891	221.556		4.185	773.693	262.832		10.137	261.99	114.831		12.09	320.925	132.254		9.393	178.066	62.7062
5.766	644.583	221.4		4.278	772.329	261.454		10.23	254.359	115.097		12.183	317.246	132.279		9.486	174.468	61.4154
5.859	642.143	220.691		4.371	771.17	260.946		10.323	253.019	116.905		12.276	316.091	128.565		9.579	171.84	63.8334
5.952	639.718	220.065		4.464	769.771	259.595		10.416	247.73	116.951		12.369	308.597	127.014		9.672	166.466	63.1445
6.045	632.373	212.267		4.557	768.261	258.123		10.509	241.625	116.349		12.462	308.439	123.331		9.765	164.66	63.8156
6.138	630.004	211.912		4.65	766.81	256.668		10.602	237.947	115.313		12.555	300.991	122.316		9.858	159.102	63.2557
6.231	624.119	214.781		4.743	760.977	260.124		10.695	231.739	114.946		12.648	297.962	118.875		9.951	162.007	64.6344
6.324	621.775	214.569		4.836	759.394	259.676		10.788	234.734	113.565		12.741	293.605	119.037		10.044	166.531	68.5202
6.417	619.533	214.444		4.929	757.638	258.586		10.881	228.885	113.907		12.834	286.155	118.99		10.137	160.827	68.1367
6.51	614.242	212.033		5.022	755.599	257.112		10.974	223.363	113.052		12.927	278.705	119.154		10.23	157.679	73.8345
6.603	610.108	212.507		5.115	748.664	259.101		11.067	218.146	112.093		13.02	271.202	119.562		10.323	152.072	73.8003
6.696	606.433	211.628		5.208	746.263	257.688		11.16	214.757	111.325		13.113	269.31	119.161		10.416	143.172	28.5434
6.789	604.688	210.949		5.301	744.825	257.191		11.253	209.008	111.627		13.206	266.609	117.394
6.882	602.638	210.953		5.394	742.774	256.268		11.346	201.41	110.263		13.299	258.976	116.288
6.975	600.903	210.28		5.487	740.452	255.379		11.439	198.627	109.959		13.392	251.335	115.386
7.068	595.781	206.422		5.58	738.165	254.468		11.532	197.237	108.816		13.485	248.852	113.783
7.161	594.083	205.979		5.673	735.73	253.816		11.625	191.128	107.043		13.578	247.377	111.113
7.254	592.185	205.851		5.766	733.234	253.293		11.718	188.425	109.335		13.671	240.589	111.02
7.347	590.127	205.843		5.859	730.821	252.809		11.811	183.276	111.14		13.764	238.992	107.885
7.44	588.557	205.488		5.952	728.46	252.817		11.904	180.752	113.735		13.857	231.184	106.645
7.533	588.64	205.737		6.045	726.194	252.937		11.997	180.833	115.412		13.95	223.484	105.458
7.626	587.005	206.983		6.138	720.771	251.696		12.09	175.473	119.084		14.043	216.358	106.117
7.719	584.513	207.152		6.231	718.6	250.861		12.183	176.809	124.036		14.136	219.262	105.314
7.812	581.759	208.07		6.324	718.036	249.79		12.276	171.903	124.423		14.229	215.786	104.533
7.905	579.229	208.346		6.417	716.779	249.381		12.369	166.996	124.842		14.322	213.016	103.203
7.998	572.922	204.404		6.51	711.398	240.99		12.462	162.09	125.292		14.415	207.09	102.537
8.091	570.392	204.397		6.603	709.059	240		12.555	162.65	134.997		14.508	201.165	102.057
8.184	568.142	203.977		6.696	708.36	239.141						14.601	204.132	102.972
8.277	566.015	203.618		6.789	705.701	238.345						14.694	198.683	103.184
8.37	563.572	202.91		6.882	703.251	237.592						14.787	193.235	103.564
8.463	559.46	202.557		6.975	700.471	236.892						14.88	191.458	103.483
8.556	557.275	202.208		7.068	697.533	235.511						14.973	179.077	99.4823
8.649	555.526	201.482		7.161	694.696	235.169						15.066	217.952	135.896
8.742	553.84	200.887		7.254	691.773	234.214
8.835	552.199	200.371		7.347	689.657	232.889
8.928	542.096	188.868		7.44	683.536	229.117
9.021	540.396	188.498		7.533	681.024	228.942
9.114	538.617	188.141		7.626	675.225	230.665
9.207	536.853	187.902		7.719	672.581	230.634
9.3	535.152	187.826		7.812	669.372	229.704
9.393	535.393	187.159		7.905	666.858	229.42
9.486	532.641	187.547		7.998	664.395	229.425
9.579	530.693	187.063		8.091	662.808	228.756
9.672	528.889	186.56		8.184	659.427	227.797
9.765	527.245	185.429		8.277	655.77	227.316
9.858	525.628	185.144		8.37	652.201	225.88
9.951	521.927	185.729		8.463	648.591	224.41
10.044	520.116	185.822		8.556	644.822	222.595
10.137	518.288	185.953		8.649	643.131	220.035
10.23	516.417	186.257		8.742	639.304	218.565
10.323	514.335	186.732		8.835	635.388	217.358
10.416	511.48	187.838		8.928	631.907	216.292
10.509	509.234	187.413		9.021	628.744	215.513
10.602	506.415	187.724		9.114	625.757	214.749
10.695	504.083	187.48		9.207	622.791	214.288
10.788	501.644	187.236		9.3	621.391	213.542
10.881	499.293	187.005		9.393	619.659	213.833
10.974	496.978	186.627		9.486	616.638	214.187
11.067	494.5	186.359		9.579	613.536	214.673
11.16	492.844	185.582		9.672	610.611	215.291
11.253	491.47	185.736		9.765	610.773	213.062
11.346	488.833	186.253		9.858	607.254	212.843
11.439	486.63	185.885		9.951	605.68	212.094
11.532	484.312	185.519		10.044	602.066	212.148
11.625	481.809	185.238		10.137	598.502	212.128
11.718	479.119	185.086		10.23	595.277	211.968
11.811	476.486	184.968		10.323	588.589	214.769
11.904	474.115	184.813		10.416	585.186	214.822
11.997	471.926	184.68		10.509	581.458	214.186
12.09	469.488	184.496		10.602	577.948	213.123
12.183	466.754	183.749		10.695	581.77	210.34
12.276	462.593	183.225		10.788	577.562	209.966
12.369	459.697	182.396		10.881	573.95	208.795
12.462	456.885	181.581		10.974	570.783	208.167
12.555	453.239	181.177		11.067	567.151	207.121
12.648	450.72	180.351		11.16	563.489	206.218
12.741	448.085	179.721		11.253	559.983	205.31
12.834	445.134	179.207		11.346	557.09	204.603
12.927	442.105	178.761		11.439	553.904	204.142
13.02	441.329	178.559		11.532	550.376	203.328
13.113	438.421	178.117		11.625	549.54	200.751
13.206	431.675	175.34		11.718	544.891	201.075
13.299	429.954	175.452		11.811	541.615	201.239
13.392	428.315	175.101		11.904	538.558	201.676
13.485	426.699	174.808		11.997	535.496	202.02
13.578	425.124	174.586		12.09	537.414	199.568
13.671	423.614	174.397		12.183	534.262	200.125
13.764	422.435	174.697		12.276	530.684	200.517
13.857	421.223	174.364		12.369	527.099	200.966
13.95	420.045	174.159		12.462	523.846	201.743
14.043	418.98	174.073		12.555	520.645	202.504
14.136	411.892	169.172		12.648	517.908	202.342
14.229	409.903	169.43		12.741	514.344	201.906
14.322	407.769	168.873		12.834	510.407	201.481
14.415	406.9	169.588		12.927	506.282	201.214
14.508	404.655	169.238		13.02	513.21	193.681
14.601	402.556	169.752		13.113	508.869	193.651
14.694	401.447	170.022		13.206	504.751	193.491
14.787	399.142	170.137		13.299	500.772	193.406
14.88	396.87	170.267		13.392	496.726	193.513
14.973	397.098	169.093		13.485	492.644	193.808
15.066	394.928	169.065		13.578	483.647	189.256
15.159	392.782	168.849		13.671	480.126	190.479
15.252	390.681	168.727		13.764	478.717	191.482
15.345	388.641	168.568		13.857	475.958	192.919
15.438	386.534	168.553		13.95	480.056	191.331
15.531	384.448	168.587		14.043	477.592	192.706
15.624	382.191	168.538		14.136	475.05	194.154
15.717	379.94	168.574		14.229	472.501	195.777
15.81	377.738	168.469		14.322	470.372	197.872
15.903	375.582	168.307		14.415	470.68	199.498
15.996	375.559	168.571		14.508	466.172	199.467
16.089	373.657	168.357		14.601	463.073	199.001
16.182	371.616	168.127		14.694	460.661	199.088
16.275	369.609	167.99		14.787	460.766	197.564
16.368	370.212	166.656		14.88	471.39	189.242
16.461	368.408	166.607		14.973	467.943	188.763
16.554	367.618	167.044		15.066	464.456	187.795
16.647	366.222	166.912		15.159	462.834	186.711
16.74	364.495	166.611		15.252	459.508	186.324
16.833	362.79	166.383		15.345	456.275	186.018
16.926	360.645	167.32		15.438	456.332	185.44
17.019	358.895	166.966		15.531	452.28	185.142
17.112	356.671	167.531		15.624	448.362	184.909
17.205	356.964	167.318		15.717	444.527	184.769
17.298	355.326	167.4		15.81	440.63	184.72
17.391	355.373	167.467		15.903	436.865	184.732
17.484	353.716	168.499		15.996	432.677	185.987
17.577	351.737	168.757		16.089	430.72	185.454
17.67	349.806	169.192		16.182	426.694	185.232
17.763	347.81	169.735		16.275	422.469	185.033
17.856	341.421	164.688		16.368	410.057	175.18
17.949	339.474	164.971		16.461	409.909	174.476
18.042	334.112	162.639		16.554	407.405	174.832
18.135	332.012	162.879		16.647	407.53	174.043
18.228	327.798	162.639		16.74	409.936	172.603
18.321	325.621	163.028		16.833	406.941	174.075
18.414	323.508	164.31		16.926	405.37	175.229
18.507	321.332	164.798		17.019	402.718	175.963
18.6	319.574	165.541		17.112	399.957	176.571
18.693	319.455	166.437		17.205	397.35	177.291
18.786	314.897	164.647		17.298	396.59	176.743
18.879	313.088	165.705		17.391	393.251	175.637
18.972	311.581	165.634		17.484	389.393	175.465
19.065	310.158	165.644		17.577	385.392	175.303
19.158	308.839	165.686		17.67	381.574	175.289
19.251	307.546	165.767		17.763	377.809	175.379
19.344	306.723	166.452		17.856	376.775	175.584
19.437	304.47	167.211		17.949	374.413	176.045
19.53	302.488	166.886		18.042	373.069	175.589
19.623	300.422	166.644		18.135	369.129	175.611
19.716	293.68	162.522		18.228	365.756	174.912
19.809	291.732	162.815		18.321	364.555	174.066
19.902	289.133	162.905		18.414	361.068	173.442
19.995	286.396	162.974		18.507	360.324	172.43
20.088	283.639	163.114		18.6	356.433	170.065
20.181	280.883	163.317		18.693	353.226	169.596
20.274	278.434	163.655		18.786	352.023	169.672
20.367	276.117	164.023		18.879	349.414	169.326
20.46	274.033	164.53		18.972	346.873	169.237
20.553	272	165.013		19.065	346.953	168.814
20.646	270.486	165.16		19.158	348.962	168.795
20.739	266.141	164.216		19.251	347.116	169.093
20.832	264.55	164.622		19.344	345.371	169.53
20.925	264.399	165.474		19.437	343.622	169.981
21.018	264.771	165.944		19.53	341.843	170.523
21.111	263.241	166.504		19.623	339.889	171.208
21.204	261.586	167.109		19.716	338.749	172.562
21.297	260.316	168.637		19.809	336.398	173.27
21.39	260.31	169.205		19.902	333.737	173.584
21.483	262.195	169.963		19.995	330.591	174.027
21.576	255.291	165.629		20.088	320.665	161.256
21.669	253.296	165.928		20.181	323.489	160.829
21.762	252.801	166.44		20.274	318.908	159.666
21.855	250.763	166.553		20.367	316.04	158.423
21.948	248.708	166.693		20.46	311.108	157.123
22.041	248.55	167.032		20.553	307.554	156.535
22.134	248.283	167.322		20.646	306.081	157.105
22.227	246.289	167.352		20.739	301.203	155.784
22.32	244.426	167.501		20.832	296.682	154.965
22.413	242.546	167.711		20.925	294.744	154.036
22.506	240.777	167.561		21.018	296.592	154.792
22.599	238.35	168.459		21.111	297.676	156.444
22.692	236.551	168.532		21.204	297.991	156.974
22.785	234.841	168.727		21.297	297.434	158.477
22.878	233.214	168.963		21.39	295.568	159.075
22.971	231.588	169.273		21.483	297.154	161.208
23.064	230.016	169.819		21.576	294.362	162.954
23.157	228.574	170.405		21.669	292.565	163.638
23.25	227.093	170.862		21.762	291.402	165.424
23.343	225.612	171.391		21.855	289.385	166.051
23.436	208.842	151.321		21.948	286.364	166.486
23.529	210.854	152.695		22.041	284.303	167.234
23.622	209.682	153.243		22.134	282.158	166.584
23.715	208.477	153.718		22.227	282.091	167.376
23.808	207.224	154.251		22.32	283.41	167.254
23.901	205.97	154.831		22.413	281.612	167.237
23.994	207.238	156.466		22.506	283.065	167.166
24.087	205.665	156.912		22.599	281.238	167.319
24.18	203.973	157.479		22.692	279.131	167.398
24.273	202.276	158.099		22.785	277.135	167.497
24.366	185.459	131.102		22.878	277.496	168.02
24.459	183.546	130.953		22.971	274.395	167.302
24.552	181.543	130.735		23.064	271.374	166.653
24.645	180.201	131.429		23.157	268.159	165.795
24.738	179.701	131.731		23.25	264.944	165.021
24.831	177.697	131.696		23.343	261.729	164.332
24.924	175.256	131.32		23.436	291.677	175.651
25.017	173.398	131.246		23.529	288.43	174.444
25.11	171.353	133.583		23.622	285.58	173.52
25.203	171.376	134.414		23.715	314.609	174.291

## Sheet: Speed
pil1Δ				pil1Δ				pil1Δ				pil1Δ				WT
Protoplasts				Protoplasts				Protoplasts				Protoplasts				Walled cells
steady state in 1.2M sorbitol				steady state in 0.8M sorbitol				steady state in 0.4M sorbitol				steady state in 0.25M sorbitol				steady state in 0M sorbitol
Speed (um/s)				Speed (um/s)				Speed (um/s)				Speed (um/s)				Speed (um/s)
time	mean	stdev		time	mean	stdev		time	mean	stdev		time	mean	stdev		time	mean	stdev
-11.997	0.0397057	0.0317229		-13.485	0.0450929	0.0435085		-7.533	0.0918044	0.12229		-5.58	NaN	0.0160397		-7.533	0.044348	0.012377
-11.904	0.0415939	0.028896		-13.392	0.0443853	0.0411106		-7.44	0.0874256	0.111762		-5.487	NaN	0.0184158		-7.44	0.0876157	0.0683062
-11.811	0.0463923	0.0344414		-13.299	0.0433841	0.038773		-7.347	0.0830467	0.101464		-5.394	0.146027	0.153101		-7.347	0.0760743	0.0614019
-11.718	0.0499113	0.0341721		-13.206	0.0419883	0.0354117		-7.254	0.0786678	0.0914718		-5.301	0.115992	0.139665		-7.254	0.0722	0.0568657
-11.625	0.0531544	0.0350919		-13.113	0.0410779	0.032243		-7.161	0.0742889	0.0818985		-5.208	0.136596	0.153221		-7.161	0.0758503	0.0570199
-11.532	0.0540512	0.0347532		-13.02	0.0393885	0.0297709		-7.068	0.06991	0.0729089		-5.115	0.133372	0.140543		-7.068	0.0706891	0.0526841
-11.439	0.0549479	0.0356362		-12.927	0.0389565	0.0278146		-6.975	0.0655311	0.0647468		-5.022	0.130381	0.135986		-6.975	0.0669568	0.0469952
-11.346	0.0574339	0.0383384		-12.834	0.0389329	0.0255084		-6.882	0.067392	0.0554204		-4.929	0.128646	0.131457		-6.882	0.0628039	0.0417264
-11.253	0.0586303	0.0400745		-12.741	0.0379423	0.0237035		-6.789	0.063677	0.0482742		-4.836	0.12988	0.125993		-6.789	0.0593284	0.039909
-11.16	0.0594213	0.0432189		-12.648	0.0373014	0.022143		-6.696	0.059962	0.0427746		-4.743	0.131114	0.122343		-6.696	0.055589	0.0376666
-11.067	0.0638526	0.0436108		-12.555	0.0463609	0.0309594		-6.603	0.0504522	0.0350151		-4.65	0.114034	0.0854218		-6.603	0.054403	0.041836
-10.974	0.0624167	0.0401288		-12.462	0.0466759	0.0292644		-6.51	0.0524423	0.0377446		-4.557	0.111225	0.0822893		-6.51	0.052712	0.0373009
-10.881	0.0608122	0.0386397		-12.369	0.0465224	0.0278821		-6.417	0.052644	0.0365755		-4.464	0.108326	0.0801292		-6.417	0.0511499	0.0349317
-10.788	0.0606731	0.0378428		-12.276	0.045441	0.0267132		-6.324	0.0501003	0.0343747		-4.371	0.10088	0.0739052		-6.324	0.0491529	0.031465
-10.695	0.0591446	0.0360893		-12.183	0.0440485	0.0253524		-6.231	0.0480907	0.0312353		-4.278	0.087497	0.0648673		-6.231	0.048733	0.0343841
-10.602	0.0579266	0.0353258		-12.09	0.0436298	0.0248456		-6.138	0.0462962	0.0292896		-4.185	0.082581	0.0616626		-6.138	0.0475321	0.031691
-10.509	0.0568836	0.0350424		-11.997	0.0458545	0.0313793		-6.045	0.0446986	0.0287299		-4.092	0.0791387	0.0609365		-6.045	0.0459947	0.029278
-10.416	0.0554774	0.0351284		-11.904	0.0445223	0.0312329		-5.952	0.0425056	0.0268611		-3.999	0.075296	0.0610952		-5.952	0.0452663	0.0272459
-10.323	0.0544362	0.0354276		-11.811	0.0440681	0.0312049		-5.859	0.0407917	0.0255127		-3.906	0.0728095	0.0638064		-5.859	0.0453531	0.0273469
-10.23	0.0527803	0.0356898		-11.718	0.0436995	0.0312416		-5.766	0.0447971	0.0413726		-3.813	0.068611	0.0585324		-5.766	0.0449614	0.0266294
-10.137	0.0519527	0.0361283		-11.625	0.0449753	0.0355327		-5.673	0.0422102	0.0383643		-3.72	0.064009	0.0563565		-5.673	0.0453012	0.0275348
-10.044	0.0507626	0.0344356		-11.532	0.044886	0.0333077		-5.58	0.0411842	0.0346215		-3.627	0.0627123	0.0535584		-5.58	0.0461245	0.0305465
-9.951	0.0488527	0.031212		-11.439	0.0443744	0.0316737		-5.487	0.0412097	0.0323639		-3.534	0.0607834	0.04923		-5.487	0.0461401	0.0340145
-9.858	0.0476065	0.0294994		-11.346	0.0445022	0.0297007		-5.394	0.0405177	0.0297754		-3.441	0.0580357	0.045435		-5.394	0.0455554	0.0330934
-9.765	0.0474376	0.0284615		-11.253	0.0486422	0.0370016		-5.301	0.0380617	0.0264426		-3.348	0.0566747	0.0435576		-5.301	0.0453923	0.0328989
-9.672	0.0465447	0.0273088		-11.16	0.0480254	0.0341104		-5.208	0.0378634	0.0238695		-3.255	0.0564892	0.0435559		-5.208	0.0458074	0.0374906
-9.579	0.0454169	0.0269229		-11.067	0.0475955	0.0312974		-5.115	0.0362152	0.0216397		-3.162	0.0553259	0.0419364		-5.115	0.0452732	0.0376435
-9.486	0.0445318	0.027101		-10.974	0.0469145	0.0290589		-5.022	0.0358312	0.020224		-3.069	0.0543212	0.0416961		-5.022	0.0433878	0.0374487
-9.393	0.0435939	0.0277644		-10.881	0.0472316	0.0285208		-4.929	0.0346221	0.0198728		-2.976	0.053353	0.0418376		-4.929	0.0420439	0.0362737
-9.3	0.0428207	0.0287921		-10.788	0.0459768	0.0268168		-4.836	0.034249	0.0207505		-2.883	0.0522119	0.0421741		-4.836	0.0403733	0.0332995
-9.207	0.0420719	0.0299664		-10.695	0.0450308	0.0258135		-4.743	0.0349507	0.0240518		-2.79	0.0520034	0.0433167		-4.743	0.0387989	0.0304872
-9.114	0.0416631	0.0288826		-10.602	0.0449055	0.0242528		-4.65	0.0349448	0.0239901		-2.697	0.051887	0.0426844		-4.65	0.0374057	0.028115
-9.021	0.0413161	0.0277326		-10.509	0.0443141	0.0229502		-4.557	0.034211	0.0239655		-2.604	0.0519167	0.0429772		-4.557	0.0363045	0.0258225
-8.928	0.0415016	0.026764		-10.416	0.0447147	0.0286936		-4.464	0.0340047	0.0241186		-2.511	0.0518916	0.0433253		-4.464	0.0376468	0.0352296
-8.835	0.0414147	0.0261461		-10.323	0.0443262	0.0277494		-4.371	0.0338743	0.0246632		-2.418	0.0528162	0.0440866		-4.371	0.0365061	0.0321455
-8.742	0.0414164	0.025232		-10.23	0.0438848	0.0265851		-4.278	0.0361235	0.0293546		-2.325	0.0547501	0.0464837		-4.278	0.0356341	0.0298125
-8.649	0.0414835	0.0245291		-10.137	0.0442902	0.0272729		-4.185	0.0358489	0.0286328		-2.232	0.0563162	0.0449408		-4.185	0.0346499	0.0280904
-8.556	0.0415431	0.0241763		-10.044	0.044016	0.0266364		-4.092	0.0355906	0.0268195		-2.139	0.058406	0.0447859		-4.092	0.0338297	0.0270069
-8.463	0.0413775	0.0241356		-9.951	0.043298	0.0261825		-3.999	0.0351962	0.0252832		-2.046	0.0603674	0.0455392		-3.999	0.0338483	0.027222
-8.37	0.0416719	0.0241456		-9.858	0.0425737	0.0261105		-3.906	0.0348263	0.0241402		-1.953	0.0626008	0.046272		-3.906	0.0332445	0.0265156
-8.277	0.0415678	0.0244072		-9.765	0.0416402	0.0263951		-3.813	0.0346306	0.0232516		-1.86	0.065318	0.0466853		-3.813	0.0325355	0.0261358
-8.184	0.0410382	0.0227275		-9.672	0.0422118	0.0284072		-3.72	0.0346937	0.0220652		-1.767	0.0683971	0.0473151		-3.72	0.0318946	0.0263792
-8.091	0.0407211	0.021342		-9.579	0.0412123	0.0270536		-3.627	0.0347182	0.0211289		-1.674	0.0716857	0.0491571		-3.627	0.0313171	0.0270882
-7.998	0.0401388	0.0200472		-9.486	0.0404711	0.0261064		-3.534	0.0350539	0.0207878		-1.581	0.0751453	0.0518047		-3.534	0.0309628	0.0258986
-7.905	0.0397699	0.0192687		-9.393	0.0394798	0.0247726		-3.441	0.0357604	0.0207257		-1.488	0.0791244	0.0552448		-3.441	0.0308397	0.0251929
-7.812	0.0391499	0.0185033		-9.3	0.0387794	0.0233359		-3.348	0.0370837	0.0213287		-1.395	0.0832392	0.0564911		-3.348	0.0311901	0.0250493
-7.719	0.0390042	0.0184638		-9.207	0.0380817	0.0221852		-3.255	0.0389056	0.0224576		-1.302	0.0870733	0.056369		-3.255	0.0315053	0.0251489
-7.626	0.0383514	0.0185134		-9.114	0.0376203	0.0212671		-3.162	0.0415188	0.0250761		-1.209	0.0911047	0.0574013		-3.162	0.0317787	0.0258084
-7.533	0.0377397	0.0189896		-9.021	0.0372809	0.0210034		-3.069	0.0434797	0.0273566		-1.116	0.0950675	0.0592336		-3.069	0.032831	0.0274583
-7.44	0.0375044	0.0203114		-8.928	0.0369778	0.0207289		-2.976	0.0455024	0.030046		-1.023	0.0989358	0.0611843		-2.976	0.0336796	0.0287607
-7.347	0.0368019	0.0212102		-8.835	0.0369433	0.0207651		-2.883	0.0477828	0.0328777		-0.93	0.102821	0.0634762		-2.883	0.0347467	0.030602
-7.254	0.0364704	0.0209425		-8.742	0.0369483	0.0206969		-2.79	0.0502097	0.0350049		-0.837	0.107075	0.0654211		-2.79	0.0358689	0.0309159
-7.161	0.0360897	0.020722		-8.649	0.0369122	0.0207737		-2.697	0.0524513	0.0371814		-0.744	0.111327	0.0681071		-2.697	0.037022	0.0302767
-7.068	0.0356921	0.0201915		-8.556	0.0370444	0.0210515		-2.604	0.0549457	0.0393218		-0.651	0.115899	0.0717513		-2.604	0.0384671	0.0300144
-6.975	0.0353767	0.0199417		-8.463	0.0379195	0.021685		-2.511	0.0574578	0.0411969		-0.558	0.119685	0.0742775		-2.511	0.0398845	0.0304484
-6.882	0.0349426	0.0193856		-8.37	0.038152	0.0222208		-2.418	0.059433	0.0416575		-0.465	0.122517	0.0745173		-2.418	0.0412241	0.0298576
-6.789	0.0347748	0.0193988		-8.277	0.0380803	0.0231134		-2.325	0.0616045	0.0421176		-0.372	0.125544	0.0754035		-2.325	0.0426171	0.0298761
-6.696	0.0343695	0.0194581		-8.184	0.0385445	0.0228496		-2.232	0.063812	0.0431736		-0.279	0.128535	0.0772477		-2.232	0.0441581	0.0304495
-6.603	0.0340048	0.0198016		-8.091	0.0387355	0.0228679		-2.139	0.0662296	0.0435928		-0.186	0.131159	0.0791293		-2.139	0.0458062	0.0313481
-6.51	0.0335439	0.0203826		-7.998	0.0393848	0.0233012		-2.046	0.0684524	0.0448399		-0.093	0.133663	0.0806515		-2.046	0.047574	0.0319534
-6.417	0.0332876	0.0207921		-7.905	0.0395607	0.0237084		-1.953	0.0703618	0.0462943		0	0.135687	0.0811107		-1.953	0.0492539	0.0325406
-6.324	0.0336632	0.019844		-7.812	0.0396568	0.0231031		-1.86	0.0717626	0.0474399		0.093	0.136132	0.0801763		-1.86	0.050925	0.0335185
-6.231	0.033986	0.0191932		-7.719	0.03961	0.0224439		-1.767	0.0738708	0.049315		0.186	0.137709	0.080161		-1.767	0.0527153	0.0344298
-6.138	0.0345908	0.0186202		-7.626	0.0408005	0.0260908		-1.674	0.0757709	0.0516712		0.279	0.138189	0.080646		-1.674	0.0550371	0.0351485
-6.045	0.0351935	0.0183909		-7.533	0.0401309	0.0253744		-1.581	0.0773076	0.0513822		0.372	0.138781	0.0810542		-1.581	0.0571791	0.0366757
-5.952	0.0359269	0.01832		-7.44	0.0397128	0.02463		-1.488	0.0793959	0.0522816		0.465	0.139381	0.0819756		-1.488	0.0590938	0.0386879
-5.859	0.0372885	0.019276		-7.347	0.0393941	0.0243551		-1.395	0.081108	0.0536369		0.558	0.140537	0.0831274		-1.395	0.0610737	0.0412785
-5.766	0.037983	0.0198732		-7.254	0.0389658	0.0242464		-1.302	0.0827521	0.055677		0.651	0.142133	0.085213		-1.302	0.063207	0.0442728
-5.673	0.0386963	0.0208015		-7.161	0.0384549	0.0245545		-1.209	0.0825997	0.0547948		0.744	0.141309	0.0860642		-1.209	0.0653249	0.0461652
-5.58	0.0393937	0.0220017		-7.068	0.0383558	0.026703		-1.116	0.084445	0.0569653		0.837	0.143301	0.088422		-1.116	0.0671195	0.0476689
-5.487	0.0399539	0.0233273		-6.975	0.0377293	0.0273993		-1.023	0.086533	0.0592162		0.93	0.143393	0.0872698		-1.023	0.0689441	0.0495644
-5.394	0.0401165	0.0233572		-6.882	0.0373911	0.0277977		-0.93	0.0887044	0.0613415		1.023	0.144337	0.0871363		-0.93	0.0709475	0.0519655
-5.301	0.0402706	0.0235053		-6.789	0.036674	0.0283229		-0.837	0.0902251	0.0624303		1.116	0.14723	0.0883308		-0.837	0.0726181	0.0534617
-5.208	0.0402757	0.0235128		-6.696	0.0359828	0.0289505		-0.744	0.0895978	0.0595205		1.209	0.149785	0.0896705		-0.744	0.0735535	0.0518562
-5.115	0.0403399	0.0237581		-6.603	0.0355345	0.0299007		-0.651	0.0916101	0.060831		1.302	0.152754	0.0912493		-0.651	0.0745193	0.0511575
-5.022	0.0404445	0.0243579		-6.51	0.0345031	0.0274068		-0.558	0.0913604	0.0587735		1.395	0.155217	0.0924938		-0.558	0.0756428	0.0515326
-4.929	0.0404973	0.0251716		-6.417	0.0336241	0.0250703		-0.465	0.0926069	0.0592009		1.488	0.156781	0.0938362		-0.465	0.0766951	0.0520558
-4.836	0.0406683	0.0263901		-6.324	0.0331934	0.023476		-0.372	0.0942597	0.0597455		1.581	0.157847	0.0952664		-0.372	0.0772549	0.0521333
-4.743	0.0408172	0.0278163		-6.231	0.032501	0.0218873		-0.279	0.0940172	0.0601362		1.674	0.160164	0.0979541		-0.279	0.0776006	0.0516075
-4.65	0.0408933	0.028653		-6.138	0.0318636	0.0204818		-0.186	0.0948503	0.0612206		1.767	0.16158	0.100759		-0.186	0.0780769	0.0520721
-4.557	0.041	0.0293106		-6.045	0.0312232	0.0195141		-0.093	0.0948126	0.0627993		1.86	0.161789	0.101768		-0.093	0.0786254	0.0532526
-4.464	0.0415925	0.0285234		-5.952	0.0309746	0.0182906		0	0.0954764	0.0638602		1.953	0.161896	0.101769		0	0.0788267	0.0546502
-4.371	0.0423051	0.0277633		-5.859	0.0309661	0.0175476		0.093	0.0977027	0.0658004		2.046	0.161346	0.100735		0.093	0.0793327	0.0570253
-4.278	0.0431381	0.0269182		-5.766	0.0309732	0.0173195		0.186	0.0989549	0.067077		2.139	0.161324	0.0999823		0.186	0.080012	0.0570574
-4.185	0.0438853	0.0262147		-5.673	0.0309813	0.0174947		0.279	0.0996336	0.0668926		2.232	0.158235	0.0986632		0.279	0.0807016	0.0561503
-4.092	0.0446168	0.0256776		-5.58	0.0314082	0.0176112		0.372	0.101417	0.0669918		2.325	0.157195	0.0975508		0.372	0.0813811	0.0558843
-3.999	0.0451799	0.0258449		-5.487	0.0318943	0.0179866		0.465	0.101771	0.0664131		2.418	0.156149	0.0981023		0.465	0.0821604	0.0561432
-3.906	0.0460043	0.0263128		-5.394	0.0321377	0.018366		0.558	0.106425	0.0746572		2.511	0.156398	0.0987425		0.558	0.083244	0.0572858
-3.813	0.0467778	0.0271464		-5.301	0.0322626	0.0190117		0.651	0.107182	0.0736951		2.604	0.155542	0.098587		0.651	0.0843242	0.0572607
-3.72	0.0476463	0.0283376		-5.208	0.0323304	0.0199882		0.744	0.107991	0.0737221		2.697	0.154526	0.0993063		0.744	0.0854669	0.0580951
-3.627	0.0483737	0.0296002		-5.115	0.0325119	0.0210177		0.837	0.109826	0.0749887		2.79	0.150004	0.0966382		0.837	0.0860754	0.0574181
-3.534	0.0489594	0.0299726		-5.022	0.0328133	0.0213058		0.93	0.108402	0.072861		2.883	0.146145	0.0950744		0.93	0.0869767	0.0568708
-3.441	0.0495517	0.0304752		-4.929	0.0335595	0.0225706		1.023	0.107633	0.0716492		2.976	0.145243	0.0927517		1.023	0.0880621	0.0570559
-3.348	0.0500218	0.0308824		-4.836	0.033817	0.0230033		1.116	0.10633	0.0714353		3.069	0.144464	0.0908589		1.116	0.08865	0.0564597
-3.255	0.0505455	0.0318791		-4.743	0.0339988	0.0230051		1.209	0.105661	0.0717194		3.162	0.144718	0.0896666		1.209	0.0893995	0.0568317
-3.162	0.0511266	0.0332363		-4.65	0.0342771	0.0230233		1.302	0.103551	0.0673481		3.255	0.143346	0.0870481		1.302	0.0900737	0.0576728
-3.069	0.0516458	0.0346731		-4.557	0.0350023	0.0238662		1.395	0.100073	0.062208		3.348	0.142514	0.0854505		1.395	0.0904502	0.0581329
-2.976	0.0519898	0.0356603		-4.464	0.0354794	0.0244097		1.488	0.0979027	0.060012		3.441	0.143078	0.0849296		1.488	0.0905125	0.0596506
-2.883	0.0522592	0.0370569		-4.371	0.0362279	0.0251747		1.581	0.0964657	0.0587974		3.534	0.144569	0.0855646		1.581	0.0907419	0.0604816
-2.79	0.052301	0.0375511		-4.278	0.0370649	0.0262664		1.674	0.0984499	0.0693798		3.627	0.145519	0.0864194		1.674	0.0907133	0.0607622
-2.697	0.0520183	0.0384593		-4.185	0.0379415	0.0276294		1.767	0.0968448	0.0678069		3.72	0.146529	0.0874864		1.767	0.0913763	0.0616652
-2.604	0.0526702	0.0380447		-4.092	0.0387362	0.028431		1.86	0.0970692	0.0667409		3.813	0.145334	0.0888062		1.86	0.0916756	0.0616311
-2.511	0.0528754	0.0369347		-3.999	0.0394937	0.0279669		1.953	0.097763	0.0663407		3.906	0.148718	0.0904296		1.953	0.0907295	0.0598866
-2.418	0.0530313	0.0361016		-3.906	0.0401734	0.0279782		2.046	0.0984159	0.0657522		3.999	0.1516	0.0911224		2.046	0.0906295	0.0582415
-2.325	0.0527511	0.0352789		-3.813	0.0409534	0.0283366		2.139	0.100066	0.065887		4.092	0.15477	0.0932107		2.139	0.0905696	0.0577379
-2.232	0.0528851	0.0345817		-3.72	0.0416482	0.0288325		2.232	0.103807	0.069959		4.185	0.155634	0.0930099		2.232	0.0910112	0.0579116
-2.139	0.0530414	0.0347218		-3.627	0.0421039	0.0297938		2.325	0.105555	0.072019		4.278	0.156091	0.0935031		2.325	0.0911841	0.0583513
-2.046	0.0531867	0.0350714		-3.534	0.0428897	0.0309983		2.418	0.107832	0.0715984		4.371	0.157432	0.0949599		2.418	0.0911426	0.0596113
-1.953	0.053508	0.0358565		-3.441	0.0433161	0.0322967		2.511	0.109241	0.0717766		4.464	0.159502	0.0972808		2.511	0.0916797	0.0591724
-1.86	0.0540894	0.0369177		-3.348	0.0433884	0.0340233		2.604	0.110439	0.071723		4.557	0.160961	0.0997316		2.604	0.0925601	0.0591992
-1.767	0.0549254	0.0372808		-3.255	0.043849	0.0360482		2.697	0.111864	0.0727065		4.65	0.162291	0.0994891		2.697	0.092905	0.0594246
-1.674	0.0547779	0.0366981		-3.162	0.0442609	0.0359256		2.79	0.1125	0.073817		4.743	0.163519	0.0996381		2.79	0.0936385	0.0596849
-1.581	0.0546038	0.0362649		-3.069	0.0444528	0.0353284		2.883	0.11244	0.0728143		4.836	0.164899	0.0991295		2.883	0.0950454	0.0601825
-1.488	0.0545765	0.0360506		-2.976	0.0446689	0.034881		2.976	0.112928	0.0708192		4.929	0.164799	0.0978431		2.976	0.0970855	0.0597952
-1.395	0.0547257	0.036065		-2.883	0.0449379	0.034617		3.069	0.112388	0.0692999		5.022	0.165093	0.095697		3.069	0.099065	0.0600919
-1.302	0.0548974	0.0364358		-2.79	0.0454258	0.0344785		3.162	0.111619	0.0683177		5.115	0.166557	0.0978141		3.162	0.101269	0.061253
-1.209	0.0550575	0.036845		-2.697	0.0459327	0.0348975		3.255	0.110646	0.0682326		5.208	0.167528	0.0981333		3.255	0.103242	0.0624813
-1.116	0.0552192	0.037696		-2.604	0.0463086	0.0350456		3.348	0.11016	0.0678051		5.301	0.16863	0.0987238		3.348	0.10524	0.0646219
-1.023	0.0553184	0.0389434		-2.511	0.0469172	0.0356199		3.441	0.111084	0.068351		5.394	0.16858	0.0994746		3.441	0.107453	0.0665493
-0.93	0.0552649	0.0404453		-2.418	0.0473604	0.0366891		3.534	0.111674	0.0686168		5.487	0.169157	0.101829		3.534	0.109527	0.0690304
-0.837	0.0543383	0.0413347		-2.325	0.0480499	0.0379406		3.627	0.113577	0.0701185		5.58	0.169784	0.102169		3.627	0.111435	0.0706014
-0.744	0.0545687	0.0422349		-2.232	0.0484402	0.0374717		3.72	0.114755	0.0708779		5.673	0.170106	0.102036		3.72	0.112332	0.0705015
-0.651	0.0548198	0.0414707		-2.139	0.0487651	0.0365578		3.813	0.115775	0.0710763		5.766	0.169093	0.100403		3.813	0.113032	0.071531
-0.558	0.0549054	0.0411172		-2.046	0.0490931	0.0360719		3.906	0.115269	0.0700101		5.859	0.1683	0.0988519		3.906	0.112858	0.0709303
-0.465	0.0549983	0.041156		-1.953	0.0493161	0.0358651		3.999	0.114997	0.0693495		5.952	0.167805	0.0987973		3.999	0.11245	0.0699404
-0.372	0.0551828	0.0406535		-1.86	0.0490966	0.0343444		4.092	0.116855	0.0697361		6.045	0.167643	0.0987536		4.092	0.111549	0.0684269
-0.279	0.0551071	0.0400895		-1.767	0.0487765	0.0333879		4.185	0.116975	0.0713169		6.138	0.166261	0.0999426		4.185	0.110667	0.0674483
-0.186	0.0552865	0.0398313		-1.674	0.0487401	0.0328984		4.278	0.118324	0.072045		6.231	0.16649	0.101834		4.278	0.109782	0.067446
-0.093	0.0554818	0.0403411		-1.581	0.0486361	0.0329947		4.371	0.119332	0.0717559		6.324	0.165964	0.102685		4.371	0.107618	0.0665452
0	0.05556	0.0413484		-1.488	0.0485056	0.0336819		4.464	0.119392	0.0719533		6.417	0.166131	0.105154		4.464	0.106452	0.0666413
0.093	0.0561356	0.0424556		-1.395	0.0486151	0.0348131		4.557	0.120867	0.0748745		6.51	0.165479	0.107089		4.557	0.105374	0.0671431
0.186	0.0572449	0.0433491		-1.302	0.0484868	0.0350855		4.65	0.123078	0.0772143		6.603	0.160487	0.10085		4.65	0.104834	0.0678168
0.279	0.0584091	0.0443802		-1.209	0.0488398	0.0356006		4.743	0.123992	0.0779648		6.696	0.162579	0.0983921		4.743	0.10441	0.0685684
0.372	0.0596153	0.0458083		-1.116	0.0491558	0.0361491		4.836	0.125356	0.0798221		6.789	0.163232	0.0956776		4.836	0.105198	0.0671289
0.465	0.0602073	0.0472294		-1.023	0.0495733	0.0369895		4.929	0.126656	0.0832376		6.882	0.165591	0.0948402		4.929	0.105733	0.0661124
0.558	0.0611212	0.0480569		-0.93	0.0501128	0.0377238		5.022	0.128526	0.0849845		6.975	0.167357	0.0934224		5.022	0.106412	0.0654779
0.651	0.0620423	0.0491544		-0.837	0.0512775	0.0391509		5.115	0.130686	0.0871669		7.068	0.168743	0.093136		5.115	0.107554	0.0655813
0.744	0.0632219	0.0506892		-0.744	0.0513575	0.0384689		5.208	0.131302	0.0848235		7.161	0.169493	0.0919949		5.208	0.108626	0.0664236
0.837	0.063937	0.0507904		-0.651	0.0513146	0.037921		5.301	0.13203	0.082979		7.254	0.171111	0.0918647		5.301	0.10961	0.0676951
0.93	0.0643708	0.0504781		-0.558	0.0516115	0.0379376		5.394	0.132338	0.0813544		7.347	0.173188	0.0935947		5.394	0.110998	0.0688326
1.023	0.0643425	0.0495731		-0.465	0.0512258	0.0374366		5.487	0.130283	0.0773125		7.44	0.174716	0.0963644		5.487	0.112219	0.0704927
1.116	0.0643859	0.0481022		-0.372	0.050885	0.0360425		5.58	0.132152	0.0755091		7.533	0.174518	0.0975778		5.58	0.113699	0.0725956
1.209	0.0637774	0.0466679		-0.279	0.0498941	0.0346025		5.673	0.133716	0.0745089		7.626	0.174089	0.0967768		5.673	0.115209	0.0747224
1.302	0.0631625	0.0456401		-0.186	0.049431	0.0332261		5.766	0.135311	0.0748322		7.719	0.173342	0.0970858		5.766	0.117254	0.0752321
1.395	0.0625869	0.0452206		-0.093	0.0488331	0.0324416		5.859	0.136935	0.0763059		7.812	0.172039	0.0973678		5.859	0.119082	0.0764698
1.488	0.0605154	0.0425814		0	0.0479683	0.0315243		5.952	0.137987	0.0788982		7.905	0.171791	0.0976871		5.952	0.12097	0.0782414
1.581	0.0597836	0.0424153		0.093	0.0476145	0.0316082		6.045	0.138692	0.0812604		7.998	0.17215	0.0985589		6.045	0.119817	0.0760304
1.674	0.0589938	0.0420971		0.186	0.0471815	0.0315779		6.138	0.139059	0.0795847		8.091	0.173047	0.0989792		6.138	0.121606	0.078865
1.767	0.058145	0.0420411		0.279	0.0469464	0.0323279		6.231	0.137023	0.0758735		8.184	0.17277	0.0987869		6.231	0.124025	0.0803234
1.86	0.0579986	0.0424059		0.372	0.0465863	0.0336222		6.324	0.137435	0.0751276		8.277	0.172352	0.0995229		6.324	0.125548	0.0820253
1.953	0.0573618	0.0427292		0.465	0.046387	0.0353301		6.417	0.137988	0.0752832		8.37	0.171382	0.0997994		6.417	0.124918	0.0788393
2.046	0.0580311	0.0423655		0.558	0.0468426	0.0369979		6.51	0.133925	0.072087		8.463	0.166354	0.0955817		6.51	0.126579	0.0806848
2.139	0.0585491	0.0418302		0.651	0.0474775	0.0389783		6.603	0.133286	0.0710362		8.556	0.166223	0.0931688		6.603	0.126479	0.0821709
2.232	0.0587292	0.0415586		0.744	0.047688	0.0383292		6.696	0.132155	0.0708881		8.649	0.167933	0.0920979		6.696	0.123978	0.0783829
2.325	0.0589106	0.0416258		0.837	0.0484904	0.0379438		6.789	0.131778	0.0715074		8.742	0.168496	0.0925822		6.789	0.124564	0.0789203
2.418	0.0595897	0.041971		0.93	0.0489069	0.0364733		6.882	0.129829	0.071661		8.835	0.167196	0.0880848		6.882	0.124952	0.0790574
2.511	0.0602954	0.0425976		1.023	0.0493159	0.0353221		6.975	0.129536	0.0733337		8.928	0.165456	0.0876409		6.975	0.123127	0.0760833
2.604	0.060866	0.0432441		1.116	0.0491173	0.0335787		7.068	0.130375	0.0731719		9.021	0.165094	0.0876945		7.068	0.121602	0.0728055
2.697	0.061658	0.0438598		1.209	0.0494443	0.0330697		7.161	0.131248	0.0732745		9.114	0.166806	0.0895188		7.161	0.119738	0.0713201
2.79	0.0621418	0.0443926		1.302	0.0496738	0.0329474		7.254	0.129659	0.0709327		9.207	0.167888	0.0910251		7.254	0.120631	0.0720479
2.883	0.0627669	0.0460224		1.395	0.0498291	0.0330904		7.347	0.130011	0.0717399		9.3	0.169253	0.0921298		7.347	0.119284	0.0684962
2.976	0.0635052	0.045552		1.488	0.0494467	0.0330023		7.44	0.133306	0.0684173		9.393	0.167383	0.0895993		7.44	0.119193	0.0694451
3.069	0.0641928	0.0453703		1.581	0.0489492	0.0327204		7.533	0.133031	0.0660426		9.486	0.169042	0.0878955		7.533	0.1211	0.0728317
3.162	0.0652026	0.0456308		1.674	0.0489743	0.0332596		7.626	0.132961	0.064668		9.579	0.168963	0.0866267		7.626	0.122479	0.0733073
3.255	0.0658303	0.0463911		1.767	0.0479862	0.0315773		7.719	0.132257	0.0643532		9.672	0.170384	0.0869772		7.719	0.124047	0.0750535
3.348	0.0659491	0.0468121		1.86	0.0476075	0.0308413		7.812	0.132096	0.064661		9.765	0.17148	0.0870343		7.812	0.126586	0.0771219
3.441	0.0657881	0.0476216		1.953	0.0481491	0.0328116		7.905	0.129611	0.0641608		9.858	0.172753	0.0868353		7.905	0.127478	0.0736157
3.534	0.0662193	0.0482679		2.046	0.0476119	0.0326506		7.998	0.129902	0.0636614		9.951	0.170881	0.0879015		7.998	0.130283	0.0760188
3.627	0.0663167	0.0490859		2.139	0.0472024	0.032961		8.091	0.130718	0.0644289		10.044	0.169567	0.0898419		8.091	0.131234	0.074603
3.72	0.0640035	0.0449961		2.232	0.0469105	0.0338258		8.184	0.131541	0.0656949		10.137	0.16894	0.0912398		8.184	0.131177	0.0720837
3.813	0.0643042	0.0457206		2.325	0.0469031	0.0345297		8.277	0.132335	0.0682448		10.23	0.169366	0.0946694		8.277	0.128415	0.0644661
3.906	0.0640397	0.0450239		2.418	0.0470814	0.0353014		8.37	0.133513	0.0699302		10.323	0.167307	0.0960795		8.37	0.126964	0.0631564
3.999	0.064343	0.044244		2.511	0.0473941	0.0364437		8.463	0.134711	0.07183		10.416	0.168856	0.0964426		8.463	0.127453	0.0637465
4.092	0.0637907	0.0436627		2.604	0.0472755	0.0364715		8.556	0.135454	0.0735849		10.509	0.17109	0.0972544		8.556	0.12904	0.0644914
4.185	0.0618036	0.0394615		2.697	0.0470888	0.0361678		8.649	0.137061	0.075891		10.602	0.16923	0.0952285		8.649	0.129267	0.0660012
4.278	0.0619121	0.0390913		2.79	0.0469132	0.0358612		8.742	0.138114	0.0788849		10.695	0.171279	0.097439		8.742	0.131506	0.0680257
4.371	0.0618511	0.0392141		2.883	0.0469663	0.0357111		8.835	0.135862	0.0780115		10.788	0.172977	0.0985506		8.835	0.131113	0.0675468
4.464	0.0615255	0.0393668		2.976	0.047317	0.0361674		8.928	0.133362	0.0781532		10.881	0.174604	0.0999098		8.928	0.131724	0.0707904
4.557	0.0616304	0.040213		3.069	0.0476868	0.0372251		9.021	0.13186	0.0767078		10.974	0.175876	0.101694		9.021	0.131445	0.0721039
4.65	0.0616111	0.0415078		3.162	0.0478387	0.038072		9.114	0.131257	0.075323		11.067	0.178658	0.102913		9.114	0.133478	0.073623
4.743	0.0614574	0.0425254		3.255	0.0474123	0.036259		9.207	0.130653	0.0753616		11.16	0.179947	0.103942		9.207	0.132252	0.0764989
4.836	0.0611795	0.0423384		3.348	0.0470001	0.034467		9.3	0.130555	0.0747256		11.253	0.180886	0.102605		9.3	0.136325	0.0807327
4.929	0.0611893	0.0425337		3.441	0.046638	0.0330263		9.393	0.131154	0.0753056		11.346	0.179044	0.0995371		9.393	0.137802	0.0857666
5.022	0.0613023	0.0430148		3.534	0.0469004	0.0321485		9.486	0.130655	0.0769769		11.439	0.177835	0.0981148		9.486	0.142999	0.08402
5.115	0.061422	0.043689		3.627	0.047363	0.0315328		9.579	0.131535	0.0784585		11.532	0.176209	0.0973254		9.579	0.140181	0.0805002
5.208	0.0614653	0.0443565		3.72	0.0477449	0.0309702		9.672	0.131882	0.0804999		11.625	0.174201	0.0973693		9.672	0.142151	0.0814939
5.301	0.061608	0.0454076		3.813	0.0479389	0.0309202		9.765	0.1322	0.0827936		11.718	0.171217	0.0990382		9.765	0.143279	0.0878402
5.394	0.0618363	0.0461198		3.906	0.0480904	0.0307585		9.858	0.133082	0.0811262		11.811	0.170827	0.099906		9.858	0.145925	0.0928793
5.487	0.0616723	0.0457721		3.999	0.048249	0.031103		9.951	0.134641	0.0802855		11.904	0.166383	0.0957772		9.951	0.143304	0.0922222
5.58	0.0615876	0.0457402		4.092	0.0484491	0.032204		10.044	0.136915	0.0800924		11.997	0.157181	0.0878094		10.044	0.140983	0.0867443
5.673	0.0616529	0.0461262		4.185	0.0488622	0.0340304		10.137	0.138107	0.081551		12.09	0.156941	0.091439		10.137	0.143913	0.0942228
5.766	0.0617357	0.0454899		4.278	0.0494825	0.0358852		10.23	0.138292	0.0842756		12.183	0.158666	0.0928887		10.23	0.136859	0.085015
5.859	0.0611522	0.0423821		4.371	0.0495905	0.0374217		10.323	0.138999	0.0875817		12.276	0.159299	0.0906598		10.323	0.140343	0.0961049
5.952	0.061447	0.0408813		4.464	0.049715	0.037663		10.416	0.13986	0.0888374		12.369	0.162933	0.0904887		10.416	0.139866	0.0846409
6.045	0.0617245	0.0396973		4.557	0.0489999	0.0369717		10.509	0.141176	0.091478		12.462	0.167064	0.0933742
6.138	0.0619937	0.038964		4.65	0.0492157	0.0365346		10.602	0.144037	0.0951313		12.555	0.169854	0.09557
6.231	0.0617046	0.03889		4.743	0.0493088	0.0363715		10.695	0.143865	0.0989745		12.648	0.178259	0.100421
6.324	0.0618897	0.0391823		4.836	0.0491325	0.036047		10.788	0.147936	0.100171		12.741	0.172615	0.094534
6.417	0.0624356	0.0395803		4.929	0.0492068	0.0363009		10.881	0.149765	0.0998771		12.834	0.173752	0.0957312
6.51	0.0626725	0.0408188		5.022	0.0494315	0.0366418		10.974	0.153087	0.0999934		12.927	0.174491	0.0992588
6.603	0.0628863	0.0414323		5.115	0.0491932	0.0360354		11.067	0.155005	0.102107		13.02	0.175795	0.103445
6.696	0.0626431	0.0395113		5.208	0.0489013	0.0350814		11.16	0.156229	0.1041		13.113	0.181536	0.111353
6.789	0.0625953	0.0380082		5.301	0.0485577	0.0344793		11.253	0.158022	0.106074		13.206	0.172185	0.0994146
6.882	0.0623999	0.0368865		5.394	0.0484311	0.033706		11.346	0.151622	0.100799		13.299	0.172995	0.0984581
6.975	0.0621467	0.0364267		5.487	0.0482799	0.0329975		11.439	0.145571	0.0928503		13.392	0.175016	0.0979698
7.068	0.0620798	0.0369165		5.58	0.0481531	0.0316528		11.532	0.148468	0.0961894		13.485	0.177218	0.100009
7.161	0.0622398	0.0381216		5.673	0.0479471	0.030737		11.625	0.15345	0.0949418		13.578	0.174807	0.101736
7.254	0.0625997	0.0392747		5.766	0.0477557	0.0297796		11.718	0.155077	0.0932962		13.671	0.171879	0.094407
7.347	0.0628017	0.0409707		5.859	0.047576	0.0293201		11.811	0.158313	0.0919946		13.764	0.173149	0.0999221
7.44	0.0629383	0.0422003		5.952	0.0473691	0.0290726		11.904	0.154332	0.0814376		13.857	0.17706	0.106069
7.533	0.0630047	0.0440967		6.045	0.0482117	0.0303132		11.997	0.157947	0.0821668		13.95	0.181139	0.113461
7.626	0.0634433	0.0439913		6.138	0.0488089	0.0306144		12.09	0.159743	0.0867598		14.043	0.179978	0.117497
7.719	0.0635659	0.0435448		6.231	0.0488699	0.0310591		12.183	0.147388	0.0820418		14.136	0.186331	0.107286
7.812	0.0638763	0.0435795		6.324	0.0489865	0.0320546		12.276	0.147041	0.0892548		14.229	0.180383	0.0941436
7.905	0.0643639	0.043716		6.417	0.0494117	0.032612		12.369	0.146694	0.0982324		14.322	0.180166	0.0872173
7.998	0.0636537	0.0411458		6.51	0.049698	0.0328415		12.462	0.146347	0.108538		14.415	0.177995	0.0829495
8.091	0.0637801	0.0411959		6.603	0.0501443	0.0333745		12.555	0.133562	0.102271		14.508	0.176696	0.0810301
8.184	0.0639126	0.040932		6.696	0.0507324	0.0335524		12.648	0.127721	0.100146		14.601	0.173156	0.0795641
8.277	0.0637113	0.0403558		6.789	0.051453	0.0340626		12.741	0.130991	0.10501		14.694	0.170274	0.083434
8.37	0.0634756	0.0394438		6.882	0.052177	0.0348397		12.834	0.130259	0.105448		14.787	0.167393	0.0903121
8.463	0.0630129	0.0390315		6.975	0.0528248	0.0357303		12.927	0.14842	0.109562		14.88	0.15952	0.096619
8.556	0.0629583	0.0380459		7.068	0.0531795	0.0359691		13.02	0.168525	0.105489		14.973	0.153626	0.106322
8.649	0.0635174	0.0374363		7.161	0.0554412	0.0413701		13.113	0.169177	0.104553		15.066	0.144337	0.0872702
8.742	0.0639247	0.0370073		7.254	0.055958	0.0413693		13.206	0.169828	0.10376		15.159	0.147574	0.0822987
8.835	0.0640951	0.0370101		7.347	0.0565176	0.0415		13.299	0.17048	0.103111		15.252	0.150971	0.0816309
8.928	0.0646698	0.0375419		7.44	0.0569546	0.0401622		13.392	0.171132	0.10261		15.345	0.154368	0.0831419
9.021	0.0648314	0.0386268		7.533	0.0569391	0.0391832		13.485	0.171783	0.102258		15.438	0.157766	0.0867181
9.114	0.064899	0.0398859		7.626	0.0563715	0.0380342		13.578	NaN	0		15.531	0.152821	0.0925695
9.207	0.0651036	0.0416883		7.719	0.0559861	0.0374266		13.671	NaN	0		15.624	0.156881	0.0994507
9.3	0.0653937	0.0435372		7.812	0.0555945	0.0373112		13.764	NaN	0		15.717	0.160941	0.107646
9.393	0.0658227	0.0456279		7.905	0.0550921	0.0366811		13.857	NaN	0		15.81	0.165001	0.116879
9.486	0.0651661	0.0430705		7.998	0.0550329	0.0361181		13.95	NaN	0		15.903	0.168391	0.133774
9.579	0.0646717	0.0414277		8.091	0.0543844	0.0354573		14.043	NaN	0		15.996	0.172953	0.139061
9.672	0.0638018	0.0402654		8.184	0.0538322	0.0352245		14.136	NaN	0		16.089	0.171808	0.135625
9.765	0.0635184	0.0396583		8.277	0.0533169	0.0350162		14.229	NaN	0		16.182	0.169962	0.132684
9.858	0.0636405	0.039585		8.37	0.0535386	0.0357217		14.322	NaN	0		16.275	0.168115	0.129893
9.951	0.0633952	0.0402088		8.463	0.0536638	0.036867		14.415	NaN	0		16.368	0.166268	0.127262
10.044	0.0637615	0.0406086		8.556	0.0541325	0.0374957		14.508	NaN	NaN		16.461	0.164422	0.124801
10.137	0.0642756	0.0414707		8.649	0.054708	0.0384466		14.601	NaN	NaN		16.554	0.163012	0.122118
10.23	0.0646543	0.042448		8.742	0.0554378	0.0396507		14.694	NaN	NaN		16.647	0.161602	0.11963
10.323	0.0649713	0.0435437		8.835	0.0563708	0.0408736		14.787	NaN	NaN		16.74	0.160192	0.11735
10.416	0.0653782	0.0425644		8.928	0.057027	0.0416868		14.88	NaN	NaN		16.833	0.158782	0.115289
10.509	0.065921	0.0413204		9.021	0.0577984	0.0429433		14.973	NaN	NaN		16.926	NaN	0.0818543
10.602	0.0663523	0.040077		9.114	0.0586749	0.0446536		15.066	NaN	NaN		17.019	NaN	0.0294044
10.695	0.0663225	0.0393317		9.207	0.0593203	0.0462622		15.159	NaN	NaN		17.112	NaN	0.009845
10.788	0.0666633	0.0394006		9.3	0.0594945	0.0459436		15.252	NaN	NaN		17.205	NaN	0.01162
10.881	0.0668881	0.0401299		9.393	0.0597626	0.0461518		15.345	NaN	NaN		17.298	NaN	0.013395
10.974	0.0665696	0.040051		9.486	0.0597305	0.0456936		15.438	NaN	NaN		17.391	NaN	0.01517
11.067	0.0659818	0.0401444		9.579	0.0588655	0.0445175		15.531	NaN	NaN		17.484	NaN	0.014935
11.16	0.065629	0.0407674		9.672	0.0587885	0.0449175		15.624	NaN	NaN		17.577	NaN	0.0147
11.253	0.0646908	0.0421365		9.765	0.0580473	0.0441286		15.717	NaN	NaN		17.67	NaN	0.014465
11.346	0.0655621	0.0428832		9.858	0.0582866	0.0439512		15.81	NaN	NaN		17.763	NaN	0.01423
11.439	0.0653093	0.0421654		9.951	0.058786	0.0438957		15.903	NaN	NaN		17.856	NaN	0
11.532	0.0651635	0.0420645		10.044	0.0592264	0.0445429		15.996	NaN	NaN		17.949	NaN	0
11.625	0.0652605	0.0424878		10.137	0.0596096	0.0442085		16.089	NaN	NaN		18.042	NaN	0
11.718	0.0652818	0.0428019		10.23	0.0606686	0.0443752		16.182	NaN	NaN		18.135	NaN	0
11.811	0.0654436	0.043541		10.323	0.0612511	0.0446536		16.275	NaN	NaN		18.228	NaN	0
11.904	0.0655903	0.0438757		10.416	0.0616837	0.0439804		16.368	NaN	NaN		18.321	NaN	0
11.997	0.0659498	0.0446624		10.509	0.0620178	0.0438727		16.461	NaN	NaN		18.414	NaN	NaN
12.09	0.0658495	0.0455067		10.602	0.0622738	0.0439121		16.554	NaN	NaN		18.507	NaN	NaN
12.183	0.0662542	0.0468272		10.695	0.0612809	0.0421746		16.647	NaN	NaN		18.6	NaN	NaN
12.276	0.0665527	0.045368		10.788	0.0613216	0.0425533		16.74	NaN	NaN		18.693	NaN	NaN
12.369	0.0672403	0.0440434		10.881	0.0612396	0.0433821		16.833	NaN	NaN		18.786	NaN	NaN
12.462	0.0678216	0.0433953		10.974	0.0610137	0.0440473		16.926	NaN	NaN		18.879	NaN	NaN
12.555	0.0685098	0.0434416		11.067	0.0610954	0.0457014		17.019	NaN	NaN		18.972	NaN	NaN
12.648	0.0689982	0.0446428		11.16	0.0612645	0.0466578		17.112	NaN	NaN		19.065	NaN	NaN
12.741	0.0696177	0.0465159		11.253	0.061882	0.0484405		17.205	NaN	NaN		19.158	NaN	NaN
12.834	0.0702709	0.0488189		11.346	0.0618989	0.049677		17.298	NaN	NaN		19.251	NaN	NaN
12.927	0.0709091	0.0515216		11.439	0.0621142	0.0515215		17.391	NaN	NaN		19.344	NaN	NaN
13.02	0.0715562	0.0543085		11.532	0.0621547	0.0538266		17.484	NaN	NaN		19.437	NaN	NaN
13.113	0.0720442	0.0571574		11.625	0.059025	0.0496826		17.577	NaN	NaN		19.53	NaN	NaN
13.206	0.0711539	0.0548263		11.718	0.059408	0.049476		17.67	NaN	NaN		19.623	NaN	NaN
13.299	0.0706426	0.0550753		11.811	0.0597578	0.0497104		17.763	NaN	NaN		19.716	NaN	NaN
13.392	0.0702264	0.0555624		11.904	0.0602977	0.0508673		17.856	NaN	NaN		19.809	NaN	NaN
13.485	0.0699662	0.0560073		11.997	0.0607643	0.0516706		17.949	NaN	NaN		19.902	NaN	NaN
13.578	0.0694494	0.05408		12.09	0.0598343	0.0502718		18.042	NaN	NaN		19.995	NaN	NaN
13.671	0.0688906	0.0528376		12.183	0.0602412	0.050771		18.135	NaN	NaN		20.088	NaN	NaN
13.764	0.0672287	0.0485848		12.276	0.0612181	0.049768		18.228	NaN	NaN		20.181	NaN	NaN
13.857	0.0670571	0.0477872		12.369	0.0618556	0.0491919		18.321	NaN	NaN		20.274	NaN	NaN
13.95	0.0671162	0.0467738		12.462	0.0625371	0.049354		18.414	NaN	NaN		20.367	NaN	NaN
14.043	0.0669986	0.0465588		12.555	0.0632816	0.0501505		18.507	NaN	NaN		20.46	NaN	NaN
14.136	0.068275	0.0449356		12.648	0.0644227	0.0507367		18.6	NaN	NaN		20.553	NaN	NaN
14.229	0.0694849	0.0443888		12.741	0.0651646	0.0509357		18.693	NaN	NaN		20.646	NaN	NaN
14.322	0.0704478	0.0447604		12.834	0.0659303	0.051776		18.786	NaN	NaN		20.739	NaN	NaN
14.415	0.0714417	0.0458227		12.927	0.0663559	0.0515644		18.879	NaN	NaN		20.832	NaN	NaN
14.508	0.0725463	0.0475352		13.02	0.0667118	0.0511797		18.972	NaN	NaN		20.925	NaN	NaN
14.601	0.0736365	0.0495184		13.113	0.0672753	0.0511983		19.065	NaN	NaN		21.018	NaN	NaN
14.694	0.0721499	0.0453377		13.206	0.0678796	0.0495777		19.158	NaN	NaN		21.111	NaN	NaN
14.787	0.0730098	0.0467119		13.299	0.0684999	0.048579		19.251	NaN	NaN		21.204	NaN	NaN
14.88	0.0738089	0.0484379		13.392	0.0690745	0.0482164		19.344	NaN	NaN		21.297	NaN	NaN
14.973	0.0751403	0.050852		13.485	0.0694484	0.0477639		19.437	NaN	NaN		21.39	NaN	NaN
15.066	0.0757341	0.0503877		13.578	0.0695207	0.0470535		19.53	NaN	NaN		21.483	NaN	NaN
15.159	0.076096	0.0502865		13.671	0.0696055	0.0462496		19.623	NaN	NaN		21.576	NaN	NaN
15.252	0.0764065	0.0509797		13.764	0.0695688	0.0459373		19.716	NaN	NaN		21.669	NaN	NaN
15.345	0.0757315	0.0514581		13.857	0.0696829	0.0459783		19.809	NaN	NaN		21.762	NaN	NaN
15.438	0.0756047	0.052882		13.95	0.0698608	0.0465103		19.902	NaN	NaN		21.855	NaN	NaN
15.531	0.0755692	0.0550515		14.043	0.0697563	0.0469309		19.995	NaN	NaN		21.948	NaN	NaN
15.624	0.0758598	0.057411		14.136	0.0696505	0.0470632		20.088	NaN	NaN		22.041	NaN	NaN
15.717	0.0754091	0.0562672		14.229	0.0693992	0.0476948		20.181	NaN	NaN		22.134	NaN	NaN
15.81	0.0752666	0.0555948		14.322	0.0693054	0.0479818		20.274	NaN	NaN		22.227	NaN	NaN
15.903	0.0750397	0.055632		14.415	0.0688923	0.0484162		20.367	NaN	NaN		22.32	NaN	NaN
15.996	0.0742586	0.0518397		14.508	0.0697621	0.0482255		20.46	NaN	NaN		22.413	NaN	NaN
16.089	0.0740874	0.0493173		14.601	0.0701198	0.0481514		20.553	NaN	NaN		22.506	NaN	NaN
16.182	0.0739097	0.0474464		14.694	0.0706251	0.0491648		20.646	NaN	NaN		22.599	NaN	NaN
16.275	0.0743895	0.0463663		14.787	0.0702155	0.0482459		20.739	NaN	NaN		22.692	NaN	NaN
16.368	0.0751287	0.0458054		14.88	0.0690402	0.044985		20.832	NaN	NaN		22.785	NaN	NaN
16.461	0.0753077	0.0460759		14.973	0.0699499	0.0474193		20.925	NaN	NaN		22.878	NaN	NaN
16.554	0.0748946	0.0465043		15.066	0.0704846	0.0483945		21.018	NaN	NaN		22.971	NaN	NaN
16.647	0.0747424	0.0480169		15.159	0.0710632	0.0502016		21.111	NaN	NaN		23.064	NaN	NaN
16.74	0.0745848	0.0490455		15.252	0.0712099	0.0515814		21.204	NaN	NaN		23.157	NaN	NaN
16.833	0.0740363	0.0501486		15.345	0.0714334	0.0535557		21.297	NaN	NaN		23.25	NaN	NaN
16.926	0.07395	0.0493122		15.438	0.0708088	0.0523974		21.39	NaN	NaN		23.343	NaN	NaN
17.019	0.0742139	0.0486487		15.531	0.0716302	0.0520412		21.483	NaN	NaN		23.436	NaN	NaN
17.112	0.0749175	0.0484789		15.624	0.0710435	0.0504114		21.576	NaN	NaN		23.529	NaN	NaN
17.205	0.0751046	0.048782		15.717	0.0699953	0.0472872		21.669	NaN	NaN		23.622	NaN	NaN
17.298	0.0756603	0.0498261		15.81	0.0703493	0.0467304		21.762	NaN	NaN		23.715	NaN	NaN
17.391	0.0764416	0.0516258		15.903	0.0707391	0.0470675		21.855	NaN	NaN		23.808	NaN	NaN
17.484	0.0769597	0.0536984		15.996	0.0724644	0.0476145		21.948	NaN	NaN		23.901	NaN	NaN
17.577	0.078154	0.0562032		16.089	0.0749535	0.0489101		22.041	NaN	NaN		23.994	NaN	NaN
17.67	0.0790673	0.058623		16.182	0.0771323	0.0513012		22.134	NaN	NaN		24.087	NaN	NaN
17.763	0.0799865	0.0614323		16.275	0.0796354	0.054241		22.227	NaN	NaN		24.18	NaN	NaN
17.856	0.0771105	0.0586525		16.368	0.0802021	0.0534314		22.32	NaN	NaN		24.273	NaN	NaN
17.949	0.0771005	0.0579283		16.461	0.079988	0.0525901		22.413	NaN	NaN		24.366	NaN	NaN
18.042	0.075914	0.055423		16.554	0.0801751	0.0525393		22.506	NaN	NaN		24.459	NaN	NaN
18.135	0.0753498	0.053551		16.647	0.0787429	0.0511015		22.599	NaN	NaN		24.552	NaN	NaN
18.228	0.0752127	0.0525357		16.74	0.0780982	0.0524442		22.692	NaN	NaN		24.645	NaN	NaN
18.321	0.0746875	0.0520342		16.833	0.0786816	0.054614		22.785	NaN	NaN		24.738	NaN	NaN
18.414	0.0747015	0.0517216		16.926	0.076191	0.0531385		22.878	NaN	NaN		24.831	NaN	NaN
18.507	0.0745578	0.0518538		17.019	0.0742818	0.0518019		22.971	NaN	NaN		24.924	NaN	NaN
18.6	0.074776	0.0525833		17.112	0.0724805	0.0510507		23.064	NaN	NaN		25.017	NaN	NaN
18.693	0.0749617	0.0536964		17.205	0.0703084	0.0492363		23.157	NaN	NaN		25.11	NaN	NaN
18.786	0.0769532	0.0526168		17.298	0.0691898	0.046746		23.25	NaN	NaN		25.203	NaN	NaN
18.879	0.0780686	0.0507197		17.391	0.0692055	0.0442907		23.343	NaN	NaN		25.296	NaN	NaN
18.972	0.0781679	0.0489671		17.484	0.0683752	0.0422476		23.436	NaN	NaN		25.389	NaN	NaN
19.065	0.079492	0.0490979		17.577	0.0679942	0.0406849		23.529	NaN	NaN		25.482	NaN	NaN
19.158	0.0806322	0.0493962		17.67	0.0681716	0.0399004		23.622	NaN	NaN		25.575	NaN	NaN
19.251	0.0816601	0.0503813		17.763	0.0678172	0.0400253		23.715	NaN	NaN		25.668	NaN	NaN
19.344	0.0821214	0.0513715		17.856	0.0667249	0.0374322		23.808	NaN	NaN		25.761	NaN	NaN
19.437	0.0831688	0.0533216		17.949	0.0673814	0.0383034		23.901	NaN	NaN		25.854	NaN	NaN
19.53	0.0834868	0.0549803		18.042	0.0682022	0.0401928		23.994	NaN	NaN		25.947	NaN	NaN
19.623	0.0843171	0.0569017		18.135	0.0691131	0.0424426		24.087	NaN	NaN		26.04	NaN	NaN
19.716	0.0828685	0.0534837		18.228	0.070072	0.0424375		24.18	NaN	NaN		26.133	NaN	NaN
19.809	0.0813408	0.0506652		18.321	0.0710423	0.0427184		24.273	NaN	NaN		26.226	NaN	NaN
19.902	0.0801665	0.0478578		18.414	0.0719469	0.0437907		24.366	NaN	NaN		26.319	NaN	NaN
19.995	0.0790078	0.0457078		18.507	0.0729188	0.0444318		24.459	NaN	NaN		26.412	NaN	NaN
20.088	0.077706	0.0442873		18.6	0.0722426	0.044564		24.552	NaN	NaN		26.505	NaN	NaN
20.181	0.0764658	0.0436925		18.693	0.0730095	0.0469762		24.645	NaN	NaN		26.598	NaN	NaN
20.274	0.0746066	0.0425582		18.786	0.0715657	0.0424508		24.738	NaN	NaN		26.691	NaN	NaN
20.367	0.0734373	0.0426166		18.879	0.0719393	0.0439076		24.831	NaN	NaN		26.784	NaN	NaN
20.46	0.0724756	0.0427374		18.972	0.0724861	0.0461897		24.924	NaN	NaN		26.877	NaN	NaN
20.553	0.0721309	0.043716		19.065	0.0730372	0.0488377		25.017	NaN	NaN		26.97	NaN	NaN
20.646	0.071977	0.0417401		19.158	0.0734471	0.0470721		25.11	NaN	NaN		27.063	NaN	NaN
20.739	0.0726614	0.0406868		19.251	0.0732106	0.0461448		25.203	NaN	NaN		27.156	NaN	NaN
20.832	0.0731493	0.0404353		19.344	0.0736994	0.0455352		25.296	NaN	NaN		27.249	NaN	NaN
20.925	0.0738129	0.0412473		19.437	0.0747579	0.0457026		25.389	NaN	NaN		27.342	NaN	NaN
21.018	0.0739464	0.0426267		19.53	0.0764072	0.0465018		25.482	NaN	NaN		27.435	NaN	NaN
21.111	0.074617	0.0448688		19.623	0.0769949	0.04709		25.575	NaN	NaN		27.528	NaN	NaN
21.204	0.0733508	0.0439333		19.716	0.0766682	0.0458778		25.668	NaN	NaN		27.621	NaN	NaN
21.297	0.0724603	0.0450948		19.809	0.0774548	0.0467039		25.761	NaN	NaN		27.714	NaN	NaN
21.39	0.0734802	0.0483389		19.902	0.078509	0.0480084		25.854	NaN	NaN		27.807	NaN	NaN
21.483	0.0703449	0.0373659		19.995	0.0792761	0.049159		25.947	NaN	NaN		27.9	NaN	NaN
21.576	0.0717806	0.0360529		20.088	0.0807655	0.0504746		26.04	NaN	NaN		27.993	NaN	NaN
21.669	0.0724571	0.0356486		20.181	0.0804581	0.0520671		26.133	NaN	NaN		28.086	NaN	NaN
21.762	0.0733281	0.0362		20.274	0.0806564	0.0536388		26.226	NaN	NaN		28.179	NaN	NaN
21.855	0.0742551	0.0371621		20.367	0.0807636	0.0547124		26.319	NaN	NaN		28.272	NaN	NaN
21.948	0.0751033	0.0388744		20.46	0.0805579	0.0560423		26.412	NaN	NaN		28.365	NaN	NaN
22.041	0.0763951	0.0412851		20.553	0.0787177	0.0538563		26.505	NaN	NaN		28.458	NaN	NaN
22.134	0.0775937	0.0443311		20.646	0.0781182	0.0522458		26.598	NaN	NaN		28.551	NaN	NaN
22.227	0.0791746	0.0480899		20.739	0.0779432	0.0514013		26.691	NaN	NaN		28.644	NaN	NaN
22.32	0.0801069	0.051026		20.832	0.0777093	0.0516875		26.784	NaN	NaN		28.737	NaN	NaN
22.413	0.0819255	0.0543263		20.925	0.0790316	0.0521676		26.877	NaN	NaN		28.83	NaN	NaN
22.506	0.0830872	0.0541763		21.018	0.0808342	0.0534851		26.97	NaN	NaN		28.923	NaN	NaN
22.599	0.0851981	0.0538343		21.111	0.0824852	0.0556642		27.063	NaN	NaN		29.016	NaN	NaN
22.692	0.086232	0.0542081		21.204	0.0824769	0.057539		27.156	NaN	NaN		29.109	NaN	NaN
22.785	0.0871599	0.0553884		21.297	0.0835857	0.0605208		27.249	NaN	NaN		29.202	NaN	NaN
22.878	0.088123	0.0573735		21.39	0.085034	0.064023		27.342	NaN	NaN		29.295	NaN	NaN
22.971	0.0890861	0.0601652		21.483	0.0866268	0.0658234		27.435	NaN	NaN		29.388	NaN	NaN
23.064	0.0901404	0.0635698		21.576	0.0845534	0.062177		27.528	NaN	NaN		29.481	NaN	NaN
23.157	0.090381	0.0630127		21.669	0.0841485	0.0599818		27.621	NaN	NaN		29.574	NaN	NaN
23.25	0.0906019	0.0628193		21.762	0.0835125	0.0583109		27.714	NaN	NaN		29.667	NaN	NaN
23.343	0.0908586	0.0632871		21.855	0.0820857	0.0557993		27.807	NaN	NaN		29.76	NaN	NaN
23.436	0.0929522	0.0607522		21.948	0.0811556	0.0527079		27.9	NaN	NaN		29.853	NaN	NaN
23.529	0.0912973	0.0565897		22.041	0.0819412	0.0505157		27.993	NaN	NaN		29.946	NaN	NaN
23.622	0.0915243	0.0547257		22.134	0.0812469	0.0491317		28.086	NaN	NaN		30.039	NaN	NaN
23.715	0.0917412	0.0535662		22.227	0.0790185	0.0473178		28.179	NaN	NaN		30.132	NaN	NaN
23.808	0.0919724	0.0531679		22.32	0.0785526	0.0483705		28.272	NaN	NaN		30.225	NaN	NaN
23.901	0.0922036	0.0535616		22.413	0.079567	0.0491968		28.365	NaN	NaN		30.318	NaN	NaN
23.994	0.0910133	0.0511286		22.506	0.0814193	0.0522134		28.458	NaN	NaN		30.411	NaN	NaN
24.087	0.0911777	0.0535774		22.599	0.0828394	0.0554876		28.551	NaN	NaN		30.504	NaN	NaN
24.18	0.0917614	0.0562789		22.692	0.0844672	0.0590603		28.644	NaN	NaN		30.597	NaN	NaN
24.273	0.0923931	0.059432		22.785	0.0868135	0.0624775		28.737	NaN	NaN		30.69	NaN	NaN
24.366	0.0939911	0.0561915		22.878	0.0824052	0.0581733		28.83	NaN	NaN		30.783	NaN	NaN
24.459	0.0917834	0.0524408		22.971	0.083589	0.0603822		28.923	NaN	NaN		30.876	NaN	NaN
24.552	0.091402	0.0503724		23.064	0.0844978	0.0629287		29.016	NaN	NaN		30.969	NaN	NaN
24.645	0.0905609	0.0492725		23.157	0.084994	0.0652788		29.109	NaN	NaN		31.062	NaN	NaN
24.738	0.0898686	0.0483892		23.25	0.0854902	0.0680912		29.202	NaN	NaN		31.155	NaN	NaN
24.831	0.0891762	0.0483903		23.343	0.0859864	0.0713114		29.295	NaN	NaN		31.248	NaN	NaN
24.924	0.0887223	0.0484173		23.436	0.0781831	0.0443232		29.388	NaN	NaN		31.341	NaN	NaN
25.017	0.088293	0.0494526		23.529	0.0782267	0.0454444		29.481	NaN	NaN		31.434	NaN	NaN
25.11	0.0878805	0.0509601		23.622	0.0761497	0.0459773		29.574	NaN	NaN		31.527	NaN	NaN
25.203	0.0878687	0.0532261		23.715	0.070708	0.0464041		29.667	NaN	NaN		31.62	NaN	NaN

## Sheet: ANOVA (# molecules)
One -way ANOVA at time 0s
Significance level	α =	0.05
	mean	stdev	N
pil1Δ protoplast 1.2 M	746.979	216.068	203
pil1Δ protoplast 0.8 M	879.254	238.927	184
pil1Δ protoplast 0.4 M	967.886	259.688	342
pil1Δ protoplast 0.25 M	1168.05	302.08	370
WT walled cells 0M	816.85	188.359	300
						ANOVA between protoplast 1.2 M and walled cells 0M	ANOVA between protoplast 0.8 M and walled cells 0M	ANOVA between protoplast 0.4 M and walled cells 0M	ANOVA between protoplast 0.25 M and walled cells 0M
Overall mean	m=	944.725				788.652	840.574	897.309	1010.8
Between-group degrees of freedom	dfb=	4				1	1	1	1
Between-group mean square value	MSb=	8.06738e+06				591086	444136	3.64563e+06	2.04344e+07
Within-group degrees of freedom	dfw=	1394				501	482	640	668
Within-group mean square value	MSw=	62520.7				39997.4	43682.6	52507.1	66288
F-ratio	F=	129.035				14.7781	10.1673	69.4311	308.267
Critical value	Fcrit=	2.37831				3.86009	3.86082	3.85603	3.85542
p-value	p=	0				0.000136498	0.00152251	0	0
There is a statistically significant difference between conditions						The difference between protoplast at 1.2 M and walled cells at 0 M is statistically significant	The difference between protoplast at 0.8 M and walled cells at 0 M is statistically significant	The difference between protoplast at 0.4 M and walled cells at 0 M is statistically significant	The difference between protoplast at 0.25 M and walled cells at 0 M is statistically significant
