# Supplementary material for: Rapid adaptation of endocytosis, exocytosis, and eisosomes after an acute increase in membrane tension in yeast cells
Source: eLife. 2021 May 13;10:e62084. doi: 10.7554/eLife.62084 (PMC9045820; doi:10.7554/eLife.62084)
Supplement: Figure 7—figure supplement 5—source data 1. [file elife-62084-fig7-figsupp5-data1.xlsx]

## Sheet: ΔP=-0.05 M
WT				WT				WT
Protoplats				Protoplats				Protoplats
Steady state in 0.4M				ΔP=-0.05 M				ΔP=-0.05 M
				0 min				10 min
Speed (um/s)				Speed (um/s)				Speed (um/s)
time	mean	stdev		time	mean	stdev		time	mean	stdev
-6.975	0.0581611	0.0482986		-6.882	0.0459357	0.027694		-5.115	0.03166	0.0107241
-6.882	0.0589633	0.052636		-6.789	0.0443414	0.0269186		-5.022	0.0307657	0.0104656
-6.789	0.057416	0.0547047		-6.696	0.0427471	0.0262291		-4.929	0.0299	0.00981761
-6.696	0.05751	0.0565044		-6.603	0.04173	0.0249764		-4.836	0.04805	0.0233795
-6.603	0.0581691	0.0610047		-6.51	0.0774462	0.0987282		-4.743	0.0464207	0.0221769
-6.51	0.0588282	0.0656524		-6.417	0.0762888	0.0972052		-4.65	0.0444169	0.0218756
-6.417	0.05625	0.0604908		-6.324	0.0751312	0.0957515		-4.557	0.042834	0.0222443
-6.324	0.0534809	0.0554888		-6.231	0.0820742	0.113423		-4.464	0.0408489	0.022175
-6.231	0.0519509	0.0504806		-6.138	0.0813417	0.112124		-4.371	0.0385805	0.0244848
-6.138	0.0504209	0.0457655		-6.045	0.0747579	0.103677		-4.278	0.0400802	0.0267932
-6.045	0.0554911	0.0351868		-5.952	0.0596098	0.0627567		-4.185	0.0396208	0.0279953
-5.952	0.0523779	0.031451		-5.859	0.057838	0.0599309		-4.092	0.0386906	0.0285506
-5.859	0.0508408	0.0284936		-5.766	0.0578706	0.058807		-3.999	0.038755	0.028927
-5.766	0.0486731	0.025451		-5.673	0.055866	0.0564479		-3.906	0.0388734	0.0290812
-5.673	0.04579	0.0226137		-5.58	0.0528429	0.0524957		-3.813	0.0379267	0.0278344
-5.58	0.045817	0.0226003		-5.487	0.0493753	0.0489145		-3.72	0.0366508	0.0263771
-5.487	0.0438048	0.0222678		-5.394	0.0479677	0.0470452		-3.627	0.035946	0.0256584
-5.394	0.0421648	0.0217411		-5.301	0.0470982	0.0457502		-3.534	0.0353918	0.0246459
-5.301	0.0400371	0.021466		-5.208	0.0445838	0.0413134		-3.441	0.0354107	0.0240493
-5.208	0.0381583	0.0214289		-5.115	0.0420083	0.0379913		-3.348	0.0350097	0.0232162
-5.115	0.0374834	0.0220182		-5.022	0.0398319	0.0338875		-3.255	0.0347625	0.0228141
-5.022	0.0366149	0.0221374		-4.929	0.0398985	0.0312749		-3.162	0.0346465	0.0227112
-4.929	0.0376994	0.022463		-4.836	0.0393728	0.0293715		-3.069	0.0342673	0.0229759
-4.836	0.0375131	0.0225468		-4.743	0.0384688	0.0265145		-2.976	0.0341207	0.0235371
-4.743	0.0375899	0.0225226		-4.65	0.0385009	0.0253669		-2.883	0.0344446	0.0239881
-4.65	0.0371693	0.0221109		-4.557	0.0389922	0.0235445		-2.79	0.0348375	0.0247981
-4.557	0.0367017	0.0220194		-4.464	0.037777	0.0220786		-2.697	0.035185	0.0251294
-4.464	0.0361424	0.0207442		-4.371	0.0371445	0.0216962		-2.604	0.0349289	0.0242764
-4.371	0.0362932	0.0203518		-4.278	0.0365612	0.0215882		-2.511	0.0347833	0.0237133
-4.278	0.0355332	0.019628		-4.185	0.0365201	0.0216083		-2.418	0.0352611	0.0231531
-4.185	0.0346334	0.0192696		-4.092	0.0360986	0.0220799		-2.325	0.0357688	0.0230276
-4.092	0.0355464	0.0237131		-3.999	0.0360047	0.0216319		-2.232	0.0367386	0.0236382
-3.999	0.0350197	0.0225824		-3.906	0.0353157	0.0213355		-2.139	0.0377852	0.0248675
-3.906	0.0344535	0.0217338		-3.813	0.0348202	0.0213184		-2.046	0.0391993	0.0265647
-3.813	0.0341359	0.0211422		-3.72	0.0344199	0.0216308		-1.953	0.0418068	0.0282211
-3.72	0.034073	0.020272		-3.627	0.0341467	0.0221761		-1.86	0.0446467	0.0305857
-3.627	0.0340297	0.0198243		-3.534	0.0341158	0.0224001		-1.767	0.0478165	0.0335212
-3.534	0.0338924	0.0196058		-3.441	0.0342048	0.023279		-1.674	0.0512417	0.0367406
-3.441	0.0334848	0.019414		-3.348	0.0342836	0.0243929		-1.581	0.0554489	0.0406457
-3.348	0.033179	0.019451		-3.255	0.0344064	0.0257518		-1.488	0.0593657	0.044178
-3.255	0.033039	0.0198579		-3.162	0.0346692	0.0268645		-1.395	0.0637526	0.0478039
-3.162	0.0331876	0.0198709		-3.069	0.0358435	0.0273297		-1.302	0.0678857	0.0503125
-3.069	0.0333373	0.0202389		-2.976	0.0372021	0.0280666		-1.209	0.072506	0.0531676
-2.976	0.0337231	0.0209398		-2.883	0.0386366	0.0291188		-1.116	0.0769178	0.0555385
-2.883	0.0341862	0.0220534		-2.79	0.0401324	0.0305034		-1.023	0.0814237	0.0568922
-2.79	0.0348695	0.0234089		-2.697	0.041915	0.032184		-0.93	0.0849391	0.0582348
-2.697	0.0361956	0.0248665		-2.604	0.0443245	0.0342465		-0.837	0.0887348	0.0598538
-2.604	0.0378549	0.0270518		-2.511	0.0468769	0.0360977		-0.744	0.0926216	0.0617545
-2.511	0.0396194	0.0289126		-2.418	0.0494975	0.0382561		-0.651	0.0956359	0.0625397
-2.418	0.0417216	0.0308491		-2.325	0.0525124	0.0408777		-0.558	0.0985172	0.0631562
-2.325	0.0438175	0.0318729		-2.232	0.0555682	0.043615		-0.465	0.101621	0.064146
-2.232	0.0459208	0.0313686		-2.139	0.0578799	0.0440714		-0.372	0.105329	0.0657225
-2.139	0.0480528	0.0314213		-2.046	0.0606663	0.0452894		-0.279	0.108575	0.0678184
-2.046	0.0504965	0.0315376		-1.953	0.0633704	0.0466696		-0.186	0.111597	0.0702311
-1.953	0.0530303	0.0321474		-1.86	0.0662733	0.0488353		-0.093	0.113792	0.0706535
-1.86	0.0555886	0.0327192		-1.767	0.0689423	0.0512305		0	0.115764	0.0713558
-1.767	0.0575816	0.0332811		-1.674	0.0712373	0.0518292		0.093	0.117533	0.0730674
-1.674	0.060227	0.0343938		-1.581	0.0734292	0.0529405		0.186	0.118766	0.074721
-1.581	0.0627641	0.0354766		-1.488	0.0754046	0.0548156		0.279	0.120504	0.0774006
-1.488	0.065355	0.0371419		-1.395	0.077492	0.0569024		0.372	0.119896	0.0768406
-1.395	0.0681038	0.0393755		-1.302	0.079689	0.0593755		0.465	0.119453	0.0776803
-1.302	0.0701573	0.040663		-1.209	0.0821494	0.0613744		0.558	0.118498	0.0769414
-1.209	0.0729081	0.0426177		-1.116	0.0841663	0.0615887		0.651	0.117413	0.076365
-1.116	0.0754535	0.0442633		-1.023	0.0862999	0.062168		0.744	0.116717	0.076703
-1.023	0.0779596	0.0465187		-0.93	0.088144	0.0629598		0.837	0.116749	0.0764425
-0.93	0.0804208	0.0486479		-0.837	0.0901691	0.0637549		0.93	0.116839	0.0760684
-0.837	0.0829885	0.050293		-0.744	0.0919651	0.0643374		1.023	0.11742	0.0760405
-0.744	0.0849183	0.0520849		-0.651	0.0935252	0.0657383		1.116	0.117959	0.075935
-0.651	0.0865324	0.0540159		-0.558	0.0950471	0.0670238		1.209	0.117935	0.0764058
-0.558	0.0882194	0.0553153		-0.465	0.0962251	0.0678741		1.302	0.119205	0.0773215
-0.465	0.0896562	0.0567766		-0.372	0.0974384	0.0693031		1.395	0.12045	0.0789226
-0.372	0.090883	0.0579601		-0.279	0.0980386	0.0697838		1.488	0.122369	0.0797735
-0.279	0.0920901	0.0590154		-0.186	0.0984711	0.0687633		1.581	0.124236	0.0811897
-0.186	0.093355	0.060071		-0.093	0.0984074	0.067866		1.674	0.125933	0.0830102
-0.093	0.0944718	0.0616419		0	0.0983664	0.0667666		1.767	0.127097	0.0845331
0	0.0954707	0.0628408		0.093	0.0986022	0.0658533		1.86	0.127583	0.0840387
0.093	0.0964897	0.0635055		0.186	0.0991691	0.0656381		1.953	0.12729	0.0828562
0.186	0.0974548	0.064777		0.279	0.0995368	0.0657265		2.046	0.127249	0.0814102
0.279	0.0984711	0.0655037		0.372	0.0999929	0.0666906		2.139	0.128378	0.080506
0.372	0.0994417	0.0663797		0.465	0.100759	0.0684119		2.232	0.128673	0.0790009
0.465	0.100273	0.0673888		0.558	0.101502	0.0708789		2.325	0.1293	0.0785576
0.558	0.101864	0.0684852		0.651	0.102646	0.0712335		2.418	0.129513	0.0774279
0.651	0.103934	0.0708998		0.744	0.104263	0.0715697		2.511	0.129815	0.0775638
0.744	0.10496	0.071279		0.837	0.106185	0.0719686		2.604	0.130232	0.078467
0.837	0.106169	0.0724866		0.93	0.108211	0.0730761		2.697	0.129697	0.0785504
0.93	0.106982	0.0735132		1.023	0.109859	0.0732398		2.79	0.131281	0.0786632
1.023	0.108218	0.0740082		1.116	0.108726	0.0733281		2.883	0.132651	0.0790026
1.116	0.108505	0.072813		1.209	0.110081	0.0729964		2.976	0.133782	0.0796296
1.209	0.109609	0.0732104		1.302	0.110828	0.0730176		3.069	0.133985	0.0800999
1.302	0.110781	0.0737877		1.395	0.111555	0.0732909		3.162	0.133793	0.0804096
1.395	0.111916	0.0751019		1.488	0.112124	0.0741661		3.255	0.133792	0.081208
1.488	0.111418	0.0746263		1.581	0.112671	0.0747307		3.348	0.134451	0.0812256
1.581	0.112017	0.0738669		1.674	0.112701	0.0741093		3.441	0.134894	0.0808464
1.674	0.112888	0.0728596		1.767	0.11259	0.0730933		3.534	0.135594	0.0821322
1.767	0.113627	0.0726928		1.86	0.112663	0.0730409		3.627	0.137305	0.0833336
1.86	0.114037	0.0725175		1.953	0.113278	0.0738753		3.72	0.138938	0.082955
1.953	0.114081	0.0721048		2.046	0.112239	0.0743184		3.813	0.140816	0.0832581
2.046	0.11451	0.0716983		2.139	0.11202	0.0737999		3.906	0.143283	0.0846589
2.139	0.115066	0.0718138		2.232	0.111861	0.0741419		3.999	0.145909	0.0856285
2.232	0.1156	0.0722439		2.325	0.110918	0.0741628		4.092	0.148545	0.085754
2.325	0.116233	0.0728641		2.418	0.110972	0.0749069		4.185	0.150906	0.0851131
2.418	0.116307	0.0721955		2.511	0.11049	0.0733203		4.278	0.153341	0.084311
2.511	0.116311	0.072418		2.604	0.110446	0.0714832		4.371	0.155424	0.0851581
2.604	0.115637	0.0716596		2.697	0.11029	0.069939		4.464	0.15741	0.0864772
2.697	0.115141	0.0719981		2.79	0.11016	0.0692341		4.557	0.158568	0.0869205
2.79	0.113819	0.0714247		2.883	0.108465	0.0673665		4.65	0.158315	0.0854216
2.883	0.112657	0.0707069		2.976	0.108199	0.06779		4.743	0.158382	0.0856846
2.976	0.111345	0.0700279		3.069	0.109434	0.0687836		4.836	0.157978	0.0856092
3.069	0.110846	0.0700433		3.162	0.11055	0.0698135		4.929	0.15813	0.0865485
3.162	0.110122	0.0704192		3.255	0.111505	0.070638		5.022	0.15883	0.0881161
3.255	0.109091	0.0702962		3.348	0.11341	0.071619		5.115	0.156904	0.0872295
3.348	0.108104	0.0693575		3.441	0.11574	0.0730988		5.208	0.157827	0.0900541
3.441	0.108081	0.0684932		3.534	0.117607	0.074398		5.301	0.158736	0.0939669
3.534	0.108354	0.0679087		3.627	0.119946	0.0753511		5.394	0.159634	0.0985907
3.627	0.108541	0.0679082		3.72	0.122341	0.0774264		5.487	0.162124	0.100857
3.72	0.108121	0.0682254		3.813	0.125068	0.0802782		5.58	0.164063	0.101911
3.813	0.108137	0.0674174		3.906	0.127218	0.0830756		5.673	0.164768	0.100844
3.906	0.108958	0.0662589		3.999	0.129073	0.0852696		5.766	0.165672	0.0988581
3.999	0.109497	0.0654891		4.092	0.130177	0.0866676		5.859	0.167284	0.0986521
4.092	0.110671	0.0652954		4.185	0.129619	0.0867481		5.952	0.169331	0.0956685
4.185	0.111582	0.0661392		4.278	0.129292	0.0876283		6.045	0.170559	0.0946659
4.278	0.112043	0.0660948		4.371	0.131192	0.0886232		6.138	0.170891	0.0924772
4.371	0.113077	0.0665304		4.464	0.132527	0.0899361		6.231	0.172296	0.0927856
4.464	0.113698	0.0671111		4.557	0.132515	0.0891003		6.324	0.173761	0.0950993
4.557	0.115127	0.069406		4.65	0.132563	0.0897552		6.417	0.17318	0.0966186
4.65	0.117132	0.0716788		4.743	0.132292	0.0888779		6.51	0.173345	0.098496
4.743	0.117013	0.0741902		4.836	0.132164	0.0884226		6.603	0.171759	0.0960197
4.836	0.117709	0.0773847		4.929	0.132464	0.088216		6.696	0.171727	0.0962526
4.929	0.118194	0.0809342		5.022	0.133371	0.0891266		6.789	0.172548	0.0975
5.022	0.117843	0.0827802		5.115	0.133339	0.0886923		6.882	0.17083	0.0961839
5.115	0.11721	0.0844933		5.208	0.13345	0.0884884		6.975	0.171244	0.0975736
5.208	0.116879	0.0831821		5.301	0.134945	0.0886578		7.068	0.166222	0.09074
5.301	0.116648	0.0825759		5.394	0.13531	0.0890782		7.161	0.165612	0.0900731
5.394	0.115756	0.0810698		5.487	0.136537	0.0893761		7.254	0.165067	0.0904998
5.487	0.114736	0.0789009		5.58	0.138216	0.0898743		7.347	0.168566	0.0921555
5.58	0.114271	0.077256		5.673	0.139983	0.0913501		7.44	0.169681	0.0924733
5.673	0.114205	0.0758957		5.766	0.142189	0.0926743		7.533	0.168798	0.0917086
5.766	0.113824	0.0744652		5.859	0.143089	0.0924815		7.626	0.167949	0.0919149
5.859	0.114222	0.0737529		5.952	0.143024	0.0914854		7.719	0.167093	0.0928548
5.952	0.113239	0.0730255		6.045	0.14426	0.0909646		7.812	0.166335	0.0933842
6.045	0.113381	0.0728794		6.138	0.144504	0.0913468		7.905	0.16651	0.0937856
6.138	0.113541	0.0714637		6.231	0.146303	0.0896662		7.998	0.165676	0.0913733
6.231	0.114619	0.0710381		6.324	0.146358	0.0871017		8.091	0.168581	0.0924726
6.324	0.115971	0.0719265		6.417	0.144881	0.0836268		8.184	0.16978	0.094648
6.417	0.117691	0.0737958		6.51	0.144274	0.0817903		8.277	0.170715	0.0961319
6.51	0.11892	0.0742257		6.603	0.143571	0.0817153		8.37	0.170818	0.0962256
6.603	0.118334	0.0728988		6.696	0.143198	0.0821087		8.463	0.172772	0.0967027
6.696	0.119915	0.0741096		6.789	0.142118	0.0798953		8.556	0.17413	0.0971461
6.789	0.120233	0.0747268		6.882	0.143482	0.0810998		8.649	0.175688	0.0980872
6.882	0.121363	0.077218		6.975	0.14427	0.0831272		8.742	0.178183	0.099323
6.975	0.121952	0.079085		7.068	0.145637	0.085898		8.835	0.181736	0.100108
7.068	0.12075	0.0764099		7.161	0.146377	0.0874666		8.928	0.184132	0.101342
7.161	0.120641	0.0737758		7.254	0.147687	0.0895483		9.021	0.180619	0.0964477
7.254	0.122337	0.073507		7.347	0.148942	0.0917574		9.114	0.18169	0.0976417
7.347	0.123455	0.0732263		7.44	0.150036	0.0927549		9.207	0.181054	0.0989956
7.44	0.12495	0.0743155		7.533	0.150883	0.0933409		9.3	0.18227	0.0980251
7.533	0.125837	0.0735826		7.626	0.149336	0.0899998		9.393	0.184128	0.0973706
7.626	0.126571	0.0733217		7.719	0.14982	0.0893007		9.486	0.178523	0.0947353
7.719	0.127676	0.0731404		7.812	0.149187	0.0882107		9.579	0.17797	0.0940402
7.812	0.128206	0.0735096		7.905	0.149881	0.0873116		9.672	0.173844	0.0897908
7.905	0.128992	0.074721		7.998	0.148412	0.0870509		9.765	0.175009	0.0893214
7.998	0.130066	0.0757982		8.091	0.150973	0.0859119		9.858	0.172839	0.0859373
8.091	0.130015	0.0760898		8.184	0.15134	0.0837784		9.951	0.1715	0.0849607
8.184	0.130769	0.07698		8.277	0.151174	0.082749		10.044	0.171166	0.0865787
8.277	0.131915	0.0778897		8.37	0.151321	0.0830165		10.137	0.169041	0.0863645
8.37	0.13168	0.0793344		8.463	0.151984	0.0853875		10.23	0.169097	0.0847326
8.463	0.132713	0.0809736		8.556	0.152811	0.0860774		10.323	0.169195	0.0829332
8.556	0.133945	0.0817014		8.649	0.152207	0.0861559		10.416	0.171345	0.078626
8.649	0.133944	0.0802303		8.742	0.152297	0.0867406		10.509	0.170735	0.0764291
8.742	0.134903	0.0815621		8.835	0.151002	0.084417		10.602	0.173598	0.0805823
8.835	0.135734	0.0831308		8.928	0.15011	0.0827102		10.695	0.174456	0.0833007
8.928	0.135	0.0798031		9.021	0.151833	0.083645		10.788	0.178086	0.0820164
9.021	0.135707	0.0791012		9.114	0.152577	0.0844179		10.881	0.179011	0.0845659
9.114	0.137104	0.0796374		9.207	0.154512	0.0862302		10.974	0.174683	0.0819371
9.207	0.135521	0.0782072		9.3	0.156534	0.0882937		11.067	0.166504	0.0846388
9.3	0.136245	0.0799799		9.393	0.159547	0.0920354		11.16	0.16497	0.0879632
9.393	0.135616	0.0798087		9.486	0.161896	0.095802		11.253	0.15445	0.0788396
9.486	0.135393	0.0824575		9.579	0.16193	0.0933822		11.346	0.15098	0.0802699
9.579	0.134855	0.084047		9.672	0.160398	0.0954078		11.439	0.149505	0.0853913
9.672	0.135991	0.087732		9.765	0.160048	0.0988065		11.532	0.148464	0.0899443
9.765	0.135559	0.0899664		9.858	0.159436	0.102071		11.625	0.146097	0.0939859
9.858	0.138283	0.0903317		9.951	0.158681	0.101943		11.718	0.141923	0.0903552
9.951	0.137409	0.089889		10.044	0.160406	0.100254		11.811	0.139587	0.0870278
10.044	0.137304	0.089403		10.137	0.159273	0.0995953		11.904	0.139674	0.0861766
10.137	0.134468	0.0875705		10.23	0.157426	0.0966902		11.997	0.136336	0.0796928
10.23	0.135699	0.088821		10.323	0.158982	0.0969582		12.09	0.138322	0.0774239
10.323	0.138682	0.0884189		10.416	0.158037	0.0969811		12.183	0.132174	0.0725883
10.416	0.13609	0.0840015		10.509	0.16199	0.0978537		12.276	0.132248	0.072967
10.509	0.136896	0.0843192		10.602	0.167738	0.0999801		12.369	0.132321	0.0758785
10.602	0.136641	0.085291		10.695	0.171476	0.101863		12.462	0.131669	0.0852283
10.695	0.136625	0.0851711		10.788	0.176827	0.102772		12.555	0.126706	0.0896441
10.788	0.135201	0.0852519		10.881	0.18275	0.102026		12.648	0.114949	0.0772154
10.881	0.135613	0.0842571		10.974	0.184581	0.10302		12.741	0.120224	0.0810464
10.974	0.132637	0.0809103		11.067	0.185332	0.100982		12.834	0.125354	0.0851401
11.067	0.128675	0.0733378		11.16	0.186554	0.10075		12.927	0.145403	0.0827713
11.16	0.127685	0.07484		11.253	0.185609	0.100615		13.02	0.150519	0.0851535
11.253	0.125673	0.0748638		11.346	0.190122	0.103258		13.113	0.158343	0.0945116
11.346	0.123109	0.0691187		11.439	0.191718	0.101614		13.206	0.164415	0.0973214
11.439	0.124456	0.0691374		11.532	0.187821	0.101425		13.299	0.170487	0.100275
11.532	0.126035	0.0699337		11.625	0.186128	0.102571		13.392	0.19733	0.101151
11.625	0.127565	0.0724721		11.718	0.18547	0.104318		13.485	0.203234	0.105265
11.718	0.122823	0.066224		11.811	0.190771	0.108367
11.811	0.125361	0.0677721		11.904	0.190934	0.108202
11.904	0.126718	0.0695939		11.997	0.187099	0.108546
11.997	0.129347	0.0729579		12.09	0.190295	0.108907
12.09	0.129763	0.0744831		12.183	0.18026	0.102054
12.183	0.121991	0.0643304		12.276	0.175444	0.0977141
12.276	0.124087	0.0662299		12.369	0.176011	0.0976102
12.369	0.120057	0.063367		12.462	0.179727	0.0986392
12.462	0.120272	0.064819		12.555	0.180116	0.101225
12.555	0.118871	0.0650812		12.648	0.179366	0.10471
12.648	0.119202	0.0638848		12.741	0.180439	0.101633
12.741	0.119369	0.0628872		12.834	0.173257	0.0961919
12.834	0.119859	0.0636975		12.927	0.168564	0.0916314
12.927	0.120167	0.0649794		13.02	0.165777	0.0974874
13.02	0.120402	0.0673762		13.113	0.164861	0.103378
13.113	0.117504	0.067262		13.206	0.156613	0.10044
13.206	0.116055	0.0694695		13.299	0.155735	0.101564
13.299	0.117585	0.0727476		13.392	0.150681	0.103076
13.392	0.119452	0.0761394		13.485	0.15471	0.105568
13.485	0.119599	0.0806886		13.578	0.163248	0.102437
13.578	0.123649	0.0820421		13.671	0.162533	0.0980782
13.671	0.123468	0.081623		13.764	0.166687	0.0974356
13.764	0.121712	0.0815589		13.857	0.171633	0.0980847
13.857	0.119956	0.0819855		13.95	0.176854	0.0999909
13.95	0.121582	0.0817973		14.043	0.182075	0.103427
14.043	0.120148	0.0859		14.136	0.172794	0.104081
14.136	0.121687	0.0875912		14.229	0.186239	0.104117
14.229	0.121175	0.0899861		14.322	0.189431	0.11088
14.322	0.115719	0.0923401		14.415	0.194569	0.11603
14.415	0.113252	0.0947856		14.508	0.180534	0.104665
14.508	0.113374	0.107788		14.601	0.168544	0.104341
14.601	0.137055	0.106179		14.694	0.169249	0.105787
14.694	0.137812	0.0951093		14.787	0.180196	0.112382
14.787	0.138569	0.0847608		14.88	0.180129	0.117634
14.88	0.139326	0.0754305		14.973	0.180061	0.124023
14.973	0.139055	0.068228
15.066	0.138784	0.0631728
15.159	0.138262	0.0608787
15.252	0.13774	0.0616632
15.345	0.137218	0.0654158
15.438	0.114015	0.0609104
15.531	0.110614	0.062739
15.624	0.116874	0.0638189
15.717	0.113961	0.0661767
15.81	0.111049	0.0688825
15.903	0.120975	0.0698339
15.996	0.118543	0.0731609
16.089	0.139352	0.061902
16.182	0.138812	0.0633321
16.275	0.138272	0.0650057

## Sheet: ΔP=-0.1 M
WT				WT				WT
Protoplats				Protoplats				Protoplats
Steady state in 0.4M				ΔP=-0.1 M				ΔP=-0.1 M
				0 min				10 min
Speed (um/s)				Speed (um/s)				Speed (um/s)
time	mean	stdev		time	mean	stdev		time	mean	stdev
-6.975	0.024682	0.0155295		-8.649	0.0444086	0.0220055		-5.301	0.037794	0.00934613
-6.882	0.024898	0.0158619		-8.556	0.0428586	0.0187769		-5.208	0.036606	0.00886641
-6.789	0.02567	0.015716		-8.463	0.0412214	0.0157639		-5.115	0.0312983	0.0120639
-6.696	0.026442	0.0156601		-8.37	0.0395843	0.0130835		-5.022	0.0302683	0.011695
-6.603	0.0462463	0.0535282		-8.277	0.0379729	0.0109984		-4.929	0.0292383	0.0114326
-6.51	0.0911022	0.13759		-8.184	0.0363614	0.00988508		-4.836	0.0282083	0.0112844
-6.417	0.0865811	0.126149		-8.091	0.03475	0.0100712		-4.743	0.0346588	0.0201413
-6.324	0.0683454	0.097897		-7.998	0.0331386	0.0114938		-4.65	0.051879	0.0409622
-6.231	0.0649915	0.0882493		-7.905	0.0316862	0.0119192		-4.557	0.0477532	0.0376465
-6.138	0.0618339	0.0785305		-7.812	0.0326433	0.0116552		-4.464	0.0465897	0.0366279
-6.045	0.0560109	0.0588275		-7.719	0.0331175	0.0176055		-4.371	0.0459074	0.0363916
-5.952	0.0543797	0.0510242		-7.626	0.0383032	0.0348264		-4.278	0.04625	0.0365112
-5.859	0.0518472	0.0449398		-7.533	0.0398303	0.0332271		-4.185	0.0444192	0.0353679
-5.766	0.0495878	0.0389182		-7.44	0.04018	0.0317502		-4.092	0.0436425	0.0375037
-5.673	0.0466461	0.0319101		-7.347	0.0397973	0.0294413		-3.999	0.0419072	0.0386272
-5.58	0.0456887	0.0287781		-7.254	0.0410751	0.0282993		-3.906	0.0423491	0.0401988
-5.487	0.0442321	0.025763		-7.161	0.0409251	0.0273748		-3.813	0.0411801	0.0409566
-5.394	0.0423968	0.0226748		-7.068	0.0414507	0.0268156		-3.72	0.0417196	0.0430941
-5.301	0.0425791	0.0226068		-6.975	0.0434929	0.0283417		-3.627	0.0415741	0.0385688
-5.208	0.0410299	0.02222		-6.882	0.0424072	0.0270985		-3.534	0.0416923	0.035465
-5.115	0.0402276	0.0220367		-6.789	0.0406212	0.0262621		-3.441	0.0415974	0.0344681
-5.022	0.0396617	0.0220791		-6.696	0.0391805	0.0244817		-3.348	0.0411311	0.0326221
-4.929	0.0393608	0.0219025		-6.603	0.0375749	0.022335		-3.255	0.0403586	0.0308199
-4.836	0.0385418	0.0219071		-6.51	0.0357866	0.0203702		-3.162	0.0406619	0.0299255
-4.743	0.0401147	0.0347109		-6.417	0.0351709	0.0203936		-3.069	0.040319	0.0298885
-4.65	0.0390062	0.0330807		-6.324	0.0342425	0.0183202		-2.976	0.0403847	0.0303041
-4.557	0.0385901	0.0319613		-6.231	0.0332482	0.0172102		-2.883	0.041699	0.0361581
-4.464	0.0379344	0.031137		-6.138	0.0319925	0.0165847		-2.79	0.0409047	0.036415
-4.371	0.0370314	0.030089		-6.045	0.0318981	0.0181513		-2.697	0.0418936	0.0373065
-4.278	0.0375674	0.0314396		-5.952	0.0314654	0.0185011		-2.604	0.0428947	0.0365994
-4.185	0.0374551	0.0307918		-5.859	0.0317819	0.0203059		-2.511	0.0440468	0.0370452
-4.092	0.0375158	0.0304395		-5.766	0.0313221	0.0209844		-2.418	0.0449565	0.0378155
-3.999	0.0381708	0.0299022		-5.673	0.0315075	0.0223969		-2.325	0.0463258	0.0390761
-3.906	0.0371832	0.029088		-5.58	0.0320232	0.0236323		-2.232	0.0481046	0.0402101
-3.813	0.0380552	0.0310645		-5.487	0.0346007	0.0271893		-2.139	0.0501639	0.0418256
-3.72	0.0389084	0.0375639		-5.394	0.0346226	0.026447		-2.046	0.0520526	0.043367
-3.627	0.0388447	0.0358761		-5.301	0.0345529	0.0255805		-1.953	0.0545663	0.0454437
-3.534	0.0389393	0.0365103		-5.208	0.0342424	0.0246741		-1.86	0.0573857	0.0476032
-3.441	0.0390716	0.036848		-5.115	0.0350924	0.0245964		-1.767	0.0603836	0.0472068
-3.348	0.0388702	0.0362592		-5.022	0.0353978	0.0240785		-1.674	0.0645497	0.0469615
-3.255	0.0388651	0.0359747		-4.929	0.0346878	0.0231741		-1.581	0.0692719	0.0478777
-3.162	0.0392679	0.0358262		-4.836	0.0353052	0.0224099		-1.488	0.0740848	0.050145
-3.069	0.0392045	0.0343245		-4.743	0.0344361	0.0214329		-1.395	0.0786311	0.0524857
-2.976	0.0394075	0.0333803		-4.65	0.0340989	0.020925		-1.302	0.0823332	0.055006
-2.883	0.039684	0.0328681		-4.557	0.033937	0.0203636		-1.209	0.0871107	0.0582674
-2.79	0.0404984	0.0326677		-4.464	0.033384	0.0204149		-1.116	0.092027	0.0620138
-2.697	0.0422504	0.035598		-4.371	0.033623	0.0215695		-1.023	0.0970636	0.0657026
-2.604	0.0433717	0.0354847		-4.278	0.0336487	0.022206		-0.93	0.102107	0.0687654
-2.511	0.0447159	0.0359653		-4.185	0.0336308	0.0233873		-0.837	0.10725	0.0700319
-2.418	0.046179	0.0366305		-4.092	0.032907	0.023918		-0.744	0.110704	0.0685771
-2.325	0.0475968	0.0374902		-3.999	0.0327118	0.0248263		-0.651	0.113619	0.0680051
-2.232	0.04938	0.0384588		-3.906	0.0333809	0.0262886		-0.558	0.116163	0.0686888
-2.139	0.0515784	0.040044		-3.813	0.0334289	0.0272503		-0.465	0.118593	0.0705149
-2.046	0.0540351	0.0419308		-3.72	0.0333175	0.0283432		-0.372	0.120698	0.072502
-1.953	0.0567099	0.0440767		-3.627	0.0332897	0.0296115		-0.279	0.122175	0.0746712
-1.86	0.0592432	0.0451415		-3.534	0.0336969	0.0298461		-0.186	0.124308	0.0776748
-1.767	0.0617804	0.0463481		-3.441	0.0340595	0.0302072		-0.093	0.12557	0.0804252
-1.674	0.0645412	0.0478018		-3.348	0.0343626	0.0309175		0	0.126831	0.0833373
-1.581	0.0675689	0.0494579		-3.255	0.0349096	0.0320328		0.093	0.126143	0.0814099
-1.488	0.0706584	0.0517385		-3.162	0.0357472	0.0332209		0.186	0.126506	0.0793235
-1.395	0.073991	0.0541964		-3.069	0.0366645	0.0345026		0.279	0.12702	0.0783722
-1.302	0.0766633	0.0546099		-2.976	0.0369428	0.0342618		0.372	0.127825	0.0783808
-1.209	0.079286	0.0553018		-2.883	0.0382197	0.0357483		0.465	0.128817	0.0789742
-1.116	0.0817693	0.0561037		-2.79	0.0395128	0.0374725		0.558	0.130358	0.0801595
-1.023	0.0838556	0.0569932		-2.697	0.0408072	0.0393557		0.651	0.132149	0.0819149
-0.93	0.0858995	0.0575741		-2.604	0.0414879	0.0399827		0.744	0.133758	0.0836141
-0.837	0.0875214	0.058429		-2.511	0.0431656	0.0411255		0.837	0.135337	0.0843918
-0.744	0.0894633	0.0593675		-2.418	0.0445619	0.0425763		0.93	0.137193	0.0857573
-0.651	0.0912969	0.0604988		-2.325	0.0462547	0.044217		1.023	0.139232	0.0851737
-0.558	0.0928813	0.0621507		-2.232	0.0480681	0.0462964		1.116	0.141791	0.0848527
-0.465	0.0943384	0.0623882		-2.139	0.0498314	0.0481269		1.209	0.144466	0.0860559
-0.372	0.0955751	0.0625306		-2.046	0.0513242	0.0491424		1.302	0.147285	0.0883679
-0.279	0.0966283	0.062442		-1.953	0.0519915	0.0499831		1.395	0.149838	0.090783
-0.186	0.0981448	0.0624169		-1.86	0.0538247	0.0523783		1.488	0.15105	0.0902918
-0.093	0.0995496	0.0629856		-1.767	0.0554741	0.054707		1.581	0.152161	0.0909213
0	0.100935	0.0624538		-1.674	0.0570202	0.0546565		1.674	0.1529	0.09195
0.093	0.101431	0.0625073		-1.581	0.0592116	0.0547246		1.767	0.153502	0.0937618
0.186	0.101914	0.061851		-1.488	0.0610712	0.055811		1.86	0.153323	0.0950421
0.279	0.102484	0.0618593		-1.395	0.0631326	0.0576211		1.953	0.151201	0.091665
0.372	0.102644	0.0626555		-1.302	0.0656203	0.0593982		2.046	0.150777	0.0887728
0.465	0.102923	0.0635478		-1.209	0.0681153	0.061446		2.139	0.14978	0.0862698
0.558	0.102899	0.0621891		-1.116	0.0689846	0.0613858		2.232	0.147411	0.0834916
0.651	0.10345	0.0629844		-1.023	0.0714078	0.0624153		2.325	0.145936	0.0823116
0.744	0.103645	0.0636685		-0.93	0.0733155	0.0638545		2.418	0.145994	0.0813109
0.837	0.104436	0.0650599		-0.837	0.0753725	0.0657767		2.511	0.145275	0.0813217
0.93	0.105245	0.0655641		-0.744	0.0755535	0.0621185		2.604	0.145014	0.0813428
1.023	0.105658	0.0659986		-0.651	0.0777181	0.0639983		2.697	0.144141	0.0804441
1.116	0.106879	0.0659855		-0.558	0.0803678	0.0664976		2.79	0.145338	0.0819936
1.209	0.108134	0.0665053		-0.465	0.0807469	0.0660225		2.883	0.147396	0.0797154
1.302	0.109314	0.0674964		-0.372	0.0818291	0.0671032		2.976	0.148575	0.0775049
1.395	0.111033	0.0689451		-0.279	0.0831522	0.0680882		3.069	0.149665	0.0757832
1.488	0.111907	0.06913		-0.186	0.0845617	0.0692756		3.162	0.150882	0.0744382
1.581	0.112563	0.0696696		-0.093	0.0854344	0.0699584		3.255	0.151654	0.0751367
1.674	0.113553	0.0704351		0	0.0870783	0.0713789		3.348	0.153894	0.0757235
1.767	0.114122	0.0716688		0.093	0.0884371	0.0731286		3.441	0.155441	0.0769236
1.86	0.114639	0.0719207		0.186	0.0875351	0.072512		3.534	0.157271	0.0786767
1.953	0.114666	0.0725481		0.279	0.0869086	0.0725651		3.627	0.1571	0.0784895
2.046	0.114805	0.073835		0.372	0.0879872	0.0738169		3.72	0.159137	0.0824643
2.139	0.115031	0.0746806		0.465	0.0890513	0.0741175		3.813	0.161163	0.0850071
2.232	0.115467	0.0765782		0.558	0.0898667	0.074682		3.906	0.162638	0.0846401
2.325	0.115136	0.0757847		0.651	0.091654	0.0756909		3.999	0.164157	0.0857238
2.418	0.116024	0.0767439		0.744	0.0933543	0.0763278		4.092	0.164535	0.088371
2.511	0.117125	0.0780488		0.837	0.0947952	0.0761768		4.185	0.166599	0.0927147
2.604	0.117163	0.0786088		0.93	0.0960826	0.076815		4.278	0.167518	0.0945749
2.697	0.118732	0.0798019		1.023	0.097366	0.0784049		4.371	0.168489	0.0970833
2.79	0.120285	0.080825		1.116	0.098595	0.0795934		4.464	0.168924	0.0983539
2.883	0.12053	0.0816288		1.209	0.0987839	0.080842		4.557	0.16931	0.0991605
2.976	0.121587	0.0823767		1.302	0.0998417	0.0836005		4.65	0.167199	0.0992608
3.069	0.123155	0.083122		1.395	0.101897	0.0867015		4.743	0.167677	0.0968467
3.162	0.123957	0.08422		1.488	0.102105	0.0884419		4.836	0.165754	0.0924754
3.255	0.123529	0.082492		1.581	0.101779	0.0890082		4.929	0.165016	0.0892953
3.348	0.123572	0.0810846		1.674	0.101322	0.0893724		5.022	0.164723	0.0875555
3.441	0.124222	0.0800371		1.767	0.0995497	0.0843528		5.115	0.163015	0.0849303
3.534	0.12532	0.0797465		1.86	0.101318	0.0864974		5.208	0.163683	0.084613
3.627	0.12638	0.0797834		1.953	0.103234	0.0894629		5.301	0.164258	0.0842581
3.72	0.126795	0.0791822		2.046	0.105362	0.090231		5.394	0.165234	0.0841498
3.813	0.127438	0.0795491		2.139	0.106895	0.090494		5.487	0.165779	0.0845916
3.906	0.127754	0.0792984		2.232	0.108058	0.091598		5.58	0.166552	0.0869777
3.999	0.127456	0.0789943		2.325	0.109027	0.0912887		5.673	0.16467	0.0851714
4.092	0.127614	0.0796832		2.418	0.110001	0.0917544		5.766	0.164514	0.0827319
4.185	0.127772	0.0794289		2.511	0.110559	0.0914949		5.859	0.165524	0.0824828
4.278	0.128702	0.0793738		2.604	0.11099	0.0914129		5.952	0.166843	0.0840201
4.371	0.128996	0.0780114		2.697	0.110391	0.0903555		6.045	0.168247	0.0879359
4.464	0.128636	0.0769553		2.79	0.110087	0.0902326		6.138	0.171858	0.0921163
4.557	0.127509	0.0752752		2.883	0.110206	0.0907828		6.231	0.172922	0.0956201
4.65	0.128505	0.0750006		2.976	0.111439	0.0910539		6.324	0.174993	0.0975132
4.743	0.128993	0.0747014		3.069	0.112678	0.0918837		6.417	0.176549	0.0977206
4.836	0.129771	0.0746333		3.162	0.114143	0.0936981		6.51	0.17815	0.100895
4.929	0.131129	0.0751958		3.255	0.114881	0.0944296		6.603	0.182743	0.100804
5.022	0.13202	0.0765804		3.348	0.116535	0.0951808		6.696	0.185114	0.0997115
5.115	0.132793	0.0776092		3.441	0.117888	0.0970527		6.789	0.187843	0.0978979
5.208	0.133467	0.0788806		3.534	0.120261	0.0987319		6.882	0.183974	0.0920157
5.301	0.134125	0.079138		3.627	0.122221	0.0996601		6.975	0.184959	0.0930622
5.394	0.135343	0.0800402		3.72	0.123908	0.101802		7.068	0.185388	0.0942354
5.487	0.135844	0.0815436		3.813	0.12669	0.10402		7.161	0.186749	0.0968256
5.58	0.134795	0.0808315		3.906	0.124362	0.0993025		7.254	0.187975	0.0982418
5.673	0.13633	0.0821421		3.999	0.124534	0.0972698		7.347	0.189393	0.0986649
5.766	0.136852	0.0822378		4.092	0.124606	0.095686		7.44	0.190938	0.0990132
5.859	0.136838	0.0822626		4.185	0.125515	0.0946233		7.533	0.191215	0.100057
5.952	0.137271	0.0828876		4.278	0.123957	0.0901125		7.626	0.192645	0.0964639
6.045	0.137794	0.0826399		4.371	0.12048	0.0849325		7.719	0.195025	0.0965018
6.138	0.138219	0.0826588		4.464	0.120208	0.0838516		7.812	0.197425	0.0991067
6.231	0.139092	0.082887		4.557	0.120171	0.0829452		7.905	0.196246	0.100567
6.324	0.139158	0.0825929		4.65	0.120304	0.0840209		7.998	0.193876	0.0992772
6.417	0.139851	0.0839645		4.743	0.120539	0.0860472		8.091	0.200639	0.100248
6.51	0.140642	0.0853204		4.836	0.122091	0.0884309		8.184	0.20369	0.107242
6.603	0.141041	0.0866452		4.929	0.122849	0.0894497		8.277	0.190944	0.0941566
6.696	0.142131	0.0869663		5.022	0.123514	0.0913279		8.37	0.188783	0.0944532
6.789	0.143296	0.0880109		5.115	0.124683	0.0914486		8.463	0.189512	0.0916411
6.882	0.14279	0.0881131		5.208	0.124788	0.0915526		8.556	0.187792	0.0877586
6.975	0.142926	0.0883585		5.301	0.12603	0.0918155		8.649	0.188038	0.0851099
7.068	0.144353	0.0888694		5.394	0.126205	0.0915667		8.742	0.191685	0.0828327
7.161	0.144953	0.0897622		5.487	0.12384	0.0863561		8.835	0.194327	0.0843448
7.254	0.146317	0.0909586		5.58	0.124513	0.0872562		8.928	0.191074	0.0840685
7.347	0.145356	0.0884087		5.673	0.125087	0.0884987		9.021	0.18627	0.083099
7.44	0.14353	0.0861256		5.766	0.125037	0.0898464		9.114	0.180236	0.0840444
7.533	0.143459	0.0857282		5.859	0.126416	0.0902936		9.207	0.178136	0.0852876
7.626	0.14446	0.0856046		5.952	0.128174	0.0924792		9.3	0.179313	0.0909975
7.719	0.144753	0.0854505		6.045	0.128539	0.0941136		9.393	0.208981	0.0808008
7.812	0.146282	0.0864274		6.138	0.129767	0.096751		9.486	0.237826	0.0662849
7.905	0.147795	0.0884544		6.231	0.130048	0.0970829		9.579	0.254297	0.0640546
7.998	0.14864	0.0895753		6.324	0.132018	0.100002		9.672	0.270769	0.0652506
8.091	0.149874	0.0906685		6.417	0.134068	0.101928		9.765	0.28724	0.0696967
8.184	0.149521	0.0884314		6.51	0.136063	0.104474		9.858	0.303711	0.0768307
8.277	0.149686	0.0870956		6.603	0.137507	0.10813		9.951	0.320183	0.0859862
8.37	0.150847	0.0888721		6.696	0.132406	0.105135		10.044	0.30461	0.0608008
8.463	0.150613	0.0902126		6.789	0.132444	0.105798		10.137	0.336626	0.0574042
8.556	0.150995	0.0896837		6.882	0.133649	0.108386		10.23	0.35044	0.0670503
8.649	0.152581	0.0907818		6.975	0.135715	0.109882
8.742	0.154221	0.0917196		7.068	0.135553	0.110247
8.835	0.152113	0.0917532		7.161	0.136225	0.108637
8.928	0.155509	0.0906523		7.254	0.138421	0.108374
9.021	0.156013	0.0901128		7.347	0.13817	0.107065
9.114	0.158611	0.0915991		7.44	0.13727	0.104752
9.207	0.158614	0.0918735		7.533	0.136954	0.105597
9.3	0.159414	0.0943229		7.626	0.13415	0.103745
9.393	0.163309	0.0982182		7.719	0.133633	0.103598
9.486	0.160466	0.0963413		7.812	0.130892	0.100875
9.579	0.161041	0.0959123		7.905	0.125481	0.100801
9.672	0.163479	0.0980824		7.998	0.121191	0.100192
9.765	0.163782	0.10082		8.091	0.115787	0.0980339
9.858	0.164117	0.101033		8.184	0.115568	0.095635
9.951	0.161858	0.0992505		8.277	0.112023	0.0869269
10.044	0.159483	0.0971096		8.37	0.107177	0.08107
10.137	0.158519	0.0964444		8.463	0.106846	0.0805697
10.23	0.156424	0.0965546		8.556	0.101968	0.0767193
10.323	0.154696	0.0974104		8.649	0.102385	0.0757504
10.416	0.15317	0.0941381		8.742	0.102907	0.0757774
10.509	0.152842	0.0929395		8.835	0.104862	0.0777236
10.602	0.154293	0.0915933		8.928	0.107099	0.0806196
10.695	0.152587	0.0913258		9.021	0.108034	0.082521
10.788	0.153514	0.089434		9.114	0.111776	0.0883936
10.881	0.153561	0.08825		9.207	0.114003	0.0916232
10.974	0.152591	0.0862468		9.3	0.116606	0.0952225
11.067	0.155005	0.0878714		9.393	0.118345	0.0999731
11.16	0.156111	0.0913056		9.486	0.120388	0.103268
11.253	0.153898	0.091998		9.579	0.123508	0.105989
11.346	0.154064	0.092934		9.672	0.125718	0.107487
11.439	0.148785	0.0921068		9.765	0.117336	0.0989378
11.532	0.145418	0.091046		9.858	0.119742	0.100066
11.625	0.146115	0.0933447		9.951	0.115594	0.0984929
11.718	0.140922	0.085029		10.044	0.112775	0.0859618
11.811	0.140578	0.0861392		10.137	0.113594	0.0858469
11.904	0.140928	0.087865		10.23	0.113539	0.0847866
11.997	0.140194	0.0905253		10.323	0.113273	0.0844071
12.09	0.143456	0.0928346		10.416	0.109438	0.0831775
12.183	0.141068	0.0978939		10.509	0.10743	0.0823596
12.276	0.138744	0.0942832		10.602	0.107665	0.0820069
12.369	0.142023	0.0911234		10.695	0.108153	0.0839042
12.462	0.146631	0.0892297		10.788	0.111967	0.0846846
12.555	0.14972	0.0890582		10.881	0.113329	0.0858857
12.648	0.151447	0.0906271		10.974	0.114378	0.0906441
12.741	0.139963	0.0725606		11.067	0.112767	0.0913538
12.834	0.13781	0.0697153		11.16	0.112666	0.0937432
12.927	0.143057	0.0686787		11.253	0.113444	0.0953284
13.02	0.144817	0.0709392		11.346	0.114221	0.0979456
13.113	0.128327	0.0712608		11.439	0.122707	0.114447
13.206	0.142497	0.078953		11.532	0.128137	0.12265
13.299	0.124944	0.0526899		11.625	0.130949	0.128681
13.392	0.128922	0.0536737		11.718	0.154532	0.148348
13.485	0.1329	0.0603403		11.811	0.156082	0.152242

## Sheet: ΔP=-0.2 M
WT				WT				WT
Protoplats				Protoplats				Protoplats
Steady state in 0.4M				ΔP=-0.2 M				ΔP=-0.2 M
				0 min				10 min
Speed (um/s)				Speed (um/s)				Speed (um/s)
time	mean	stdev		time	mean	stdev		time	mean	stdev
-6.045	0.0535158	0.0312142		-9.765	0.0517493	0.0484043		-5.58	0.128013	0.11506
-5.952	0.0542875	0.0345417		-9.672	0.0488846	0.0446149		-5.487	0.125557	0.105835
-5.859	0.0558617	0.0376212		-9.579	0.0481755	0.0423393		-5.394	0.112786	0.0935168
-5.766	0.0554461	0.0403144		-9.486	0.0456675	0.0393696		-5.301	0.10759	0.084321
-5.673	0.0588193	0.0436104		-9.393	0.0429882	0.0354634		-5.208	0.105225	0.0786212
-5.58	0.058074	0.0467754		-9.3	0.0407672	0.0324214		-5.115	0.103075	0.0738914
-5.487	0.0586133	0.050421		-9.207	0.0385672	0.0297748		-5.022	0.100925	0.0705164
-5.394	0.0591527	0.0544016		-9.114	0.0362973	0.0273461		-4.929	0.0934075	0.0696872
-5.301	0.0596273	0.0587079		-9.021	0.0344606	0.0254494		-4.836	0.0915106	0.0692697
-5.208	0.060102	0.063228		-8.928	0.0325242	0.0239177		-4.743	0.0843509	0.0594639
-5.115	0.062596	0.0672338		-8.835	0.0492529	0.0589663		-4.65	0.0821014	0.0822619
-5.022	0.0606571	0.0610143		-8.742	0.0483075	0.0545334		-4.557	0.081201	0.0796177
-4.929	0.0579251	0.0550529		-8.649	0.0473556	0.0508271		-4.464	0.0807345	0.0781333
-4.836	0.056877	0.0515456		-8.556	0.0464362	0.0477393		-4.371	0.078968	0.0749444
-4.743	0.0550696	0.0484124		-8.463	0.0475952	0.0448045		-4.278	0.0739449	0.0669201
-4.65	0.053603	0.0476566		-8.37	0.0462896	0.0425064		-4.185	0.07159	0.0624114
-4.557	0.0522609	0.0486289		-8.277	0.0452352	0.0414757		-4.092	0.0689342	0.0596098
-4.464	0.0506194	0.0500765		-8.184	0.0441681	0.0406252		-3.999	0.0651593	0.0572534
-4.371	0.049058	0.0514365		-8.091	0.0430714	0.0405358		-3.906	0.0603875	0.0546599
-4.278	0.0506002	0.0543503		-7.998	0.0422498	0.0406338		-3.813	0.056845	0.0511588
-4.185	0.0517167	0.0562431		-7.905	0.0410064	0.0414219		-3.72	0.0545057	0.0500678
-4.092	0.0500357	0.050617		-7.812	0.0404074	0.0411255		-3.627	0.0533943	0.0490757
-3.999	0.0492125	0.0459023		-7.719	0.040254	0.0415953		-3.534	0.0525478	0.0476276
-3.906	0.0476787	0.0414972		-7.626	0.0396441	0.041429		-3.441	0.0500112	0.0446544
-3.813	0.0479519	0.0456519		-7.533	0.0394694	0.0416032		-3.348	0.0503887	0.042582
-3.72	0.0468157	0.0417849		-7.44	0.0388107	0.0375806		-3.255	0.0511525	0.0441694
-3.627	0.0453574	0.0390539		-7.347	0.0379793	0.033849		-3.162	0.0503786	0.0435144
-3.534	0.0456135	0.044702		-7.254	0.0371659	0.0302419		-3.069	0.0511963	0.0452313
-3.441	0.0453605	0.0457868		-7.161	0.0362934	0.0271566		-2.976	0.052433	0.0504457
-3.348	0.0452943	0.0518347		-7.068	0.0352273	0.0244241		-2.883	0.0515635	0.0497372
-3.255	0.0433262	0.0473517		-6.975	0.0341956	0.022324		-2.79	0.0515719	0.0498671
-3.162	0.0422048	0.0431801		-6.882	0.0336179	0.0207474		-2.697	0.0512435	0.0484491
-3.069	0.0413066	0.0406172		-6.789	0.0329897	0.0195965		-2.604	0.0516533	0.0480598
-2.976	0.0403517	0.0383534		-6.696	0.0324662	0.0193449		-2.511	0.0524676	0.0485938
-2.883	0.0397322	0.0370517		-6.603	0.0321894	0.0198731		-2.418	0.0533908	0.0483808
-2.79	0.0391717	0.0346615		-6.51	0.0319523	0.01994		-2.325	0.0552341	0.0472308
-2.697	0.0398113	0.0359774		-6.417	0.0326418	0.021219		-2.232	0.0579624	0.0483119
-2.604	0.0395194	0.0353641		-6.324	0.0328741	0.0219635		-2.139	0.0603878	0.0493595
-2.511	0.040072	0.0363469		-6.231	0.0330666	0.0229671		-2.046	0.0625408	0.0505357
-2.418	0.0405027	0.0375621		-6.138	0.0333689	0.02422		-1.953	0.0653753	0.0518993
-2.325	0.041319	0.0374071		-6.045	0.0335431	0.0253637		-1.86	0.0676591	0.0519973
-2.232	0.0431849	0.0375137		-5.952	0.0336842	0.0260882		-1.767	0.0701101	0.0524118
-2.139	0.0456032	0.0387869		-5.859	0.0337001	0.0267021		-1.674	0.0726714	0.0529382
-2.046	0.0483469	0.0409313		-5.766	0.03383	0.0275097		-1.581	0.0753965	0.054639
-1.953	0.0510531	0.0424979		-5.673	0.033931	0.028536		-1.488	0.0786706	0.0568
-1.86	0.054291	0.0452732		-5.58	0.0342983	0.0285957		-1.395	0.0819704	0.0588337
-1.767	0.0575176	0.0489353		-5.487	0.0356625	0.0294844		-1.302	0.0846701	0.060577
-1.674	0.0611795	0.0533812		-5.394	0.0357888	0.0288162		-1.209	0.0871833	0.0623162
-1.581	0.0647057	0.0572189		-5.301	0.0358036	0.0285102		-1.116	0.0898121	0.0634324
-1.488	0.0687829	0.0616344		-5.208	0.0359759	0.028867		-1.023	0.0923553	0.0643366
-1.395	0.0727257	0.0639972		-5.115	0.036	0.0294135		-0.93	0.0954744	0.0659557
-1.302	0.075985	0.0630453		-5.022	0.0357113	0.0298183		-0.837	0.0978473	0.066252
-1.209	0.0787474	0.0626466		-4.929	0.0360537	0.0313637		-0.744	0.100629	0.0666713
-1.116	0.0814768	0.0626652		-4.836	0.0362429	0.033259		-0.651	0.103343	0.0680711
-1.023	0.0845752	0.0623259		-4.743	0.0364591	0.0355582		-0.558	0.106083	0.0696082
-0.93	0.0871251	0.0601499		-4.65	0.0368732	0.0365091		-0.465	0.108332	0.0702288
-0.837	0.0897098	0.0591086		-4.557	0.0374561	0.0374079		-0.372	0.110565	0.0710096
-0.744	0.0919987	0.0593868		-4.464	0.037869	0.0391045		-0.279	0.112915	0.0726943
-0.651	0.0940796	0.0608046		-4.371	0.0382057	0.0411593		-0.186	0.115408	0.0753802
-0.558	0.0961415	0.063917		-4.278	0.0386153	0.0435227		-0.093	0.117598	0.0776567
-0.465	0.0981302	0.0673964		-4.185	0.0388833	0.0455933		0	0.118681	0.0786505
-0.372	0.1005	0.0686976		-4.092	0.0389396	0.044208		0.093	0.118908	0.0782909
-0.279	0.102884	0.0706285		-3.999	0.0391127	0.0440593		0.186	0.120365	0.0792289
-0.186	0.105651	0.0734827		-3.906	0.0394921	0.0444205		0.279	0.121319	0.0802762
-0.093	0.107233	0.0744681		-3.813	0.0398498	0.0452816		0.372	0.12189	0.0802671
0	0.108759	0.0745857		-3.72	0.0402754	0.0438768		0.465	0.122703	0.0784054
0.093	0.10983	0.0744381		-3.627	0.0410079	0.0429751		0.558	0.121601	0.0766586
0.186	0.110946	0.0744749		-3.534	0.0414991	0.0425469		0.651	0.122357	0.0759773
0.279	0.111312	0.073988		-3.441	0.0421605	0.0429126		0.744	0.123566	0.0760722
0.372	0.111929	0.0735169		-3.348	0.0427116	0.0439095		0.837	0.12392	0.0764275
0.465	0.112638	0.073116		-3.255	0.0430277	0.045187		0.93	0.124716	0.0768862
0.558	0.113069	0.0710362		-3.162	0.0438199	0.0469875		1.023	0.125327	0.077155
0.651	0.113982	0.0697117		-3.069	0.0448425	0.0484764		1.116	0.12616	0.0778445
0.744	0.114622	0.0687925		-2.976	0.0456664	0.0500655		1.209	0.126307	0.0781569
0.837	0.115744	0.068847		-2.883	0.0466849	0.0519431		1.302	0.12696	0.0797167
0.93	0.116956	0.069016		-2.79	0.046237	0.0464658		1.395	0.127433	0.0794396
1.023	0.118272	0.0701026		-2.697	0.0469738	0.0466217		1.488	0.12743	0.0777088
1.116	0.119753	0.0717118		-2.604	0.0481768	0.047226		1.581	0.127865	0.0771362
1.209	0.121137	0.0736561		-2.511	0.0492064	0.0480358		1.674	0.128363	0.0776777
1.302	0.122467	0.0755389		-2.418	0.0504379	0.0494911		1.767	0.12897	0.078349
1.395	0.124369	0.077936		-2.325	0.0513465	0.0509108		1.86	0.127817	0.0782776
1.488	0.124964	0.0773756		-2.232	0.0523573	0.052282		1.953	0.128795	0.0793737
1.581	0.125557	0.0765188		-2.139	0.0534984	0.0535368		2.046	0.13011	0.0809966
1.674	0.125848	0.0747071		-2.046	0.055034	0.0554356		2.139	0.130629	0.0819467
1.767	0.125938	0.0733463		-1.953	0.0564572	0.0576695		2.232	0.13089	0.0818015
1.86	0.125698	0.0726127		-1.86	0.0577834	0.0573772		2.325	0.129633	0.0784154
1.953	0.125089	0.0719122		-1.767	0.058901	0.0572795		2.418	0.129176	0.0769139
2.046	0.124863	0.0717711		-1.674	0.0600827	0.0572576		2.511	0.129212	0.0747017
2.139	0.124958	0.0724707		-1.581	0.0613111	0.0577615		2.604	0.129904	0.0752372
2.232	0.12502	0.073809		-1.488	0.0623572	0.0584201		2.697	0.131233	0.0761221
2.325	0.124592	0.0755144		-1.395	0.063558	0.0595895		2.79	0.132803	0.077051
2.418	0.124643	0.0756078		-1.302	0.0642617	0.0586598		2.883	0.133465	0.0767583
2.511	0.12444	0.0760659		-1.209	0.0649539	0.0584522		2.976	0.133817	0.0753878
2.604	0.124975	0.0767335		-1.116	0.0657956	0.0590912		3.069	0.134472	0.0751731
2.697	0.123767	0.0751114		-1.023	0.0667643	0.0604084		3.162	0.135407	0.0754005
2.79	0.124717	0.0760862		-0.93	0.0681545	0.0616041		3.255	0.135672	0.0757631
2.883	0.125288	0.07817		-0.837	0.0693794	0.0628718		3.348	0.136365	0.0751053
2.976	0.125997	0.0792944		-0.744	0.0713228	0.0644147		3.441	0.135961	0.0742136
3.069	0.125707	0.0800403		-0.651	0.0724065	0.0645208		3.534	0.136391	0.0753491
3.162	0.126501	0.0822825		-0.558	0.0743222	0.0670318		3.627	0.137256	0.0769153
3.255	0.127935	0.0849242		-0.465	0.0762062	0.070023		3.72	0.137649	0.0782823
3.348	0.128264	0.0856456		-0.372	0.0766975	0.0702815		3.813	0.138221	0.0785456
3.441	0.12878	0.0852095		-0.279	0.0788583	0.072466		3.906	0.138218	0.0784578
3.534	0.128787	0.0823079		-0.186	0.0811446	0.075124		3.999	0.138518	0.0793014
3.627	0.128813	0.0805687		-0.093	0.0831571	0.078076		4.092	0.138576	0.0794365
3.72	0.128785	0.0796593		0	0.0825219	0.0737829		4.185	0.138688	0.0794663
3.813	0.130473	0.0797677		0.093	0.0834578	0.0738189		4.278	0.138868	0.0786306
3.906	0.130308	0.0804507		0.186	0.0848984	0.0730914		4.371	0.139793	0.0784016
3.999	0.131445	0.0818826		0.279	0.0864185	0.0724543		4.464	0.140425	0.0777434
4.092	0.13254	0.0836513		0.372	0.0874542	0.0718598		4.557	0.141807	0.0773485
4.185	0.133255	0.0860535		0.465	0.0877699	0.0701696		4.65	0.143243	0.0777245
4.278	0.133645	0.0857764		0.558	0.089487	0.070483		4.743	0.144326	0.0785394
4.371	0.134962	0.0872527		0.651	0.0908542	0.0703785		4.836	0.146016	0.079922
4.464	0.13643	0.0881449		0.744	0.0920546	0.0704123		4.929	0.146769	0.080751
4.557	0.138306	0.0883653		0.837	0.0924455	0.0701202		5.022	0.147848	0.0825818
4.65	0.140544	0.089509		0.93	0.0917187	0.0688183		5.115	0.14534	0.0803438
4.743	0.141668	0.08927		1.023	0.0916644	0.0701483		5.208	0.145528	0.0810136
4.836	0.142652	0.0901795		1.116	0.0932333	0.0714883		5.301	0.14554	0.0826132
4.929	0.143311	0.0912037		1.209	0.094793	0.0734428		5.394	0.143879	0.0828066
5.022	0.142309	0.0920096		1.302	0.0963672	0.0756583		5.487	0.14307	0.0844291
5.115	0.1417	0.0935768		1.395	0.0971258	0.0780925		5.58	0.142709	0.0844379
5.208	0.140975	0.0931494		1.488	0.0978324	0.079293		5.673	0.14295	0.082919
5.301	0.139137	0.0919594		1.581	0.0982584	0.079838		5.766	0.143151	0.0820556
5.394	0.138934	0.0911025		1.674	0.0980712	0.0792145		5.859	0.142823	0.0809966
5.487	0.13794	0.088856		1.767	0.098778	0.0796545		5.952	0.143851	0.0812122
5.58	0.137298	0.0865791		1.86	0.0956617	0.0770486		6.045	0.145259	0.0804313
5.673	0.137793	0.0845658		1.953	0.0957986	0.0772369		6.138	0.146396	0.0782063
5.766	0.137286	0.0833658		2.046	0.0965132	0.0763081		6.231	0.148675	0.0788286
5.859	0.137078	0.0830671		2.139	0.0969027	0.0754699		6.324	0.149902	0.0798787
5.952	0.136689	0.0836317		2.232	0.0976111	0.0754004		6.417	0.152178	0.0818385
6.045	0.13628	0.0843415		2.325	0.0983382	0.0758332		6.51	0.153464	0.08313
6.138	0.136155	0.082672		2.418	0.0993997	0.0763603		6.603	0.154883	0.0839018
6.231	0.137667	0.0813287		2.511	0.100964	0.076651		6.696	0.156898	0.0849874
6.324	0.137346	0.0813622		2.604	0.102684	0.0775017		6.789	0.158412	0.086226
6.417	0.138601	0.0817115		2.697	0.104306	0.0789469		6.882	0.15984	0.0883248
6.51	0.137874	0.079478		2.79	0.102304	0.0738301		6.975	0.160161	0.0885784
6.603	0.138964	0.0805511		2.883	0.103585	0.0749037		7.068	0.161474	0.0893202
6.696	0.1402	0.080799		2.976	0.104309	0.0748121		7.161	0.160231	0.088453
6.789	0.14114	0.0821593		3.069	0.105012	0.075696		7.254	0.160375	0.0905357
6.882	0.142499	0.0846967		3.162	0.106072	0.076997		7.347	0.159007	0.0898464
6.975	0.143819	0.0872958		3.255	0.107077	0.0792699		7.44	0.157736	0.0895898
7.068	0.146196	0.087579		3.348	0.10815	0.0804289		7.533	0.156982	0.0900556
7.161	0.146559	0.0878477		3.441	0.108472	0.0805193		7.626	0.157069	0.0903071
7.254	0.147514	0.0885148		3.534	0.108722	0.0808256		7.719	0.156253	0.0910367
7.347	0.147741	0.087475		3.627	0.109016	0.0822649		7.812	0.156198	0.0907811
7.44	0.14766	0.0870924		3.72	0.10958	0.0849452		7.905	0.15336	0.0875116
7.533	0.145694	0.0839796		3.813	0.109681	0.0869121		7.998	0.15303	0.0862306
7.626	0.147194	0.084604		3.906	0.110337	0.0862131		8.091	0.153685	0.0861181
7.719	0.148257	0.0862783		3.999	0.11148	0.086446		8.184	0.152834	0.0860036
7.812	0.146803	0.0861871		4.092	0.112257	0.0874908		8.277	0.155116	0.0878547
7.905	0.146786	0.0888238		4.185	0.11316	0.0888148		8.37	0.155841	0.0895895
7.998	0.1484	0.0899053		4.278	0.114703	0.0890473		8.463	0.158434	0.0906828
8.091	0.150187	0.0911905		4.371	0.116306	0.0887885		8.556	0.157586	0.0920413
8.184	0.148357	0.0909266		4.464	0.117817	0.088781		8.649	0.15749	0.0925389
8.277	0.150565	0.091442		4.557	0.119361	0.0895188		8.742	0.15516	0.0901049
8.37	0.152314	0.0922976		4.65	0.12121	0.0912047		8.835	0.155688	0.0921764
8.463	0.153789	0.0936607		4.743	0.123139	0.0936779		8.928	0.156132	0.0910611
8.556	0.155054	0.0949698		4.836	0.124535	0.094023		9.021	0.153052	0.0856886
8.649	0.156991	0.0960099		4.929	0.125698	0.0943037		9.114	0.153594	0.0875218
8.742	0.15796	0.0971321		5.022	0.127263	0.0954538		9.207	0.155475	0.0866409
8.835	0.154998	0.0958309		5.115	0.128024	0.0970735		9.3	0.157339	0.086916
8.928	0.154599	0.091296		5.208	0.127155	0.0978368		9.393	0.158814	0.084472
9.021	0.154804	0.0909567		5.301	0.127427	0.0974312		9.486	0.156542	0.0806732
9.114	0.155037	0.0898847		5.394	0.127076	0.0969468		9.579	0.158172	0.0812083
9.207	0.151789	0.0852101		5.487	0.127251	0.0972154		9.672	0.162566	0.0837104
9.3	0.15076	0.0837713		5.58	0.127411	0.0986685		9.765	0.164906	0.0828594
9.393	0.150439	0.0819251		5.673	0.127144	0.0996877		9.858	0.163133	0.0817666
9.486	0.150464	0.081916		5.766	0.127101	0.0978278		9.951	0.162863	0.0826652
9.579	0.148958	0.0836494		5.859	0.127227	0.0968229		10.044	0.161447	0.0853547
9.672	0.149509	0.0867088		5.952	0.127455	0.0965719		10.137	0.15833	0.0856471
9.765	0.152522	0.0918686		6.045	0.127616	0.097037		10.23	0.155666	0.0829826
9.858	0.148376	0.0846876		6.138	0.127655	0.0961364		10.323	0.156294	0.079951
9.951	0.149643	0.0898252		6.231	0.128534	0.0946631		10.416	0.155823	0.0789277
10.044	0.146098	0.092439		6.324	0.129475	0.0941925		10.509	0.153967	0.0793665
10.137	0.149462	0.0984455		6.417	0.130416	0.0947283		10.602	0.151838	0.0818801
10.23	0.15164	0.0990005		6.51	0.131867	0.0960395		10.695	0.153171	0.0838266
10.323	0.144214	0.0966618		6.603	0.13273	0.0980175		10.788	0.15075	0.0780157
10.416	0.144231	0.0989815		6.696	0.133726	0.0981087		10.881	0.154067	0.0790324
10.509	0.138616	0.0942239		6.789	0.134722	0.0989814		10.974	0.156106	0.0816386
10.602	0.134297	0.0914453		6.882	0.135302	0.0995925		11.067	0.158053	0.0828746
10.695	0.136205	0.0920227		6.975	0.135938	0.10092		11.16	0.162161	0.0852611
10.788	0.133895	0.0901461		7.068	0.136501	0.100553		11.253	0.160312	0.0826995
10.881	0.139813	0.0886828		7.161	0.136314	0.0977004		11.346	0.160898	0.0829522
10.974	0.141941	0.0887341		7.254	0.1357	0.0956785		11.439	0.159965	0.0854272
11.067	0.137959	0.084421		7.347	0.134692	0.093837		11.532	0.160162	0.0893465
11.16	0.136567	0.0824335		7.44	0.134967	0.0933408		11.625	0.163682	0.0943065
11.253	0.133571	0.0836173		7.533	0.135036	0.0942321		11.718	0.149883	0.0881552
11.346	0.130201	0.0804764		7.626	0.134432	0.0913087		11.811	0.146299	0.088394
11.439	0.127505	0.0809919		7.719	0.134843	0.0905069		11.904	0.142714	0.0905286
11.532	0.126448	0.0829513		7.812	0.135123	0.0903788		11.997	0.15141	0.0823984
11.625	0.123988	0.0848061		7.905	0.13642	0.0916657		12.09	0.148007	0.0819022
11.718	0.126837	0.0882703		7.998	0.137219	0.091616		12.183	0.155491	0.0797784
11.811	0.112813	0.0718451		8.091	0.138265	0.0922193		12.276	0.146362	0.0731591
11.904	0.117773	0.0718241		8.184	0.140004	0.0938083		12.369	0.146045	0.0692952
11.997	0.109788	0.0642563		8.277	0.140621	0.0942401		12.462	0.145728	0.0673711
12.09	0.111414	0.0628076		8.37	0.141435	0.0955737		12.555	0.139809	0.0673481
12.183	0.114671	0.0598999		8.463	0.141654	0.0989226		12.648	0.134873	0.0760145
12.276	0.117927	0.0586351		8.556	0.143823	0.100273		12.741	0.143563	0.0771065
12.369	0.119379	0.0598409		8.649	0.143295	0.0988781		12.834	0.152253	0.080531
12.462	0.119622	0.0618619		8.742	0.143972	0.10121
12.555	0.123097	0.0661583		8.835	0.147016	0.106047
12.648	0.140697	0.0758515		8.928	0.146119	0.106406
12.741	0.138062	0.0798567		9.021	0.139854	0.100973
12.834	0.139101	0.0880547		9.114	0.14124	0.102535
12.927	0.137121	0.0948811		9.207	0.142866	0.105048
13.02	0.140413	0.104321		9.3	0.145704	0.108902
13.113	0.101652	0.0542872		9.393	0.143508	0.110788
13.206	0.0996383	0.0518853		9.486	0.137318	0.103585
				9.579	0.137917	0.101584
				9.672	0.139455	0.100806
				9.765	0.140484	0.10087
				9.858	0.143344	0.0988663
				9.951	0.145402	0.0993216
				10.044	0.146957	0.0985425
				10.137	0.147659	0.09949
				10.23	0.148321	0.101481
				10.323	0.145218	0.103353
				10.416	0.143479	0.105269
				10.509	0.143528	0.107372
				10.602	0.144104	0.110148
				10.695	0.142998	0.112686
