# Supplementary material for: Rapid adaptation of endocytosis, exocytosis, and eisosomes after an acute increase in membrane tension in yeast cells
Source: eLife. 2021 May 13;10:e62084. doi: 10.7554/eLife.62084 (PMC9045820; doi:10.7554/eLife.62084)
Supplement: Figure 7—figure supplement 6—source data 1. [file elife-62084-fig7-figsupp6-data1.xlsx]

## Sheet: ΔP=-0.05 M
pil1Δ				pil1Δ				pil1Δ
Protoplats				Protoplats				Protoplats
Steady state in 0.4 M				ΔP=-0.05 M				ΔP=-0.05 M
				0 min				10 min
Speed (um/s)				Speed (um/s)				Speed (um/s)
time	mean	stdev		time	mean	stdev		time	mean	stdev
-7.905	0.0410971	0.0282669		-6.51	0.052314	0.0286328		-5.115	0.0585262	0.0527819
-7.812	0.0409479	0.0281233		-6.417	0.0552836	0.0304231		-5.022	0.060075	0.0533515
-7.719	0.0407986	0.0281297		-6.324	0.0509708	0.033208		-4.929	0.0584521	0.0494874
-7.626	0.0411929	0.0277391		-6.231	0.0521823	0.0350758		-4.836	0.0558419	0.0436377
-7.533	0.0417813	0.0266497		-6.138	0.05607	0.0363855		-4.743	0.0520124	0.0405107
-7.44	0.0420107	0.0267039		-6.045	0.0562936	0.0368925		-4.65	0.0457026	0.0356148
-7.347	0.04224	0.0269933		-5.952	0.061676	0.0413011		-4.557	0.0432441	0.0313088
-7.254	0.04814	0.0345236		-5.859	0.0605262	0.0399273		-4.464	0.0425268	0.0287048
-7.161	0.0477544	0.0336337		-5.766	0.0600144	0.0403104		-4.371	0.0416803	0.026818
-7.068	0.0472647	0.0320875		-5.673	0.0586071	0.0401733		-4.278	0.0406981	0.025696
-6.975	0.0506232	0.0347491		-5.58	0.0540855	0.0372774		-4.185	0.0395064	0.0235312
-6.882	0.0523177	0.0391847		-5.487	0.052744	0.0359993		-4.092	0.0404178	0.0257312
-6.789	0.0510998	0.0371347		-5.394	0.0490233	0.0349539		-3.999	0.0395237	0.0235425
-6.696	0.0494863	0.0352206		-5.301	0.0463306	0.0332161		-3.906	0.039835	0.0221181
-6.603	0.0481628	0.033107		-5.208	0.0466504	0.0311027		-3.813	0.0390278	0.0221603
-6.51	0.0460546	0.0323576		-5.115	0.0459398	0.0302888		-3.72	0.038204	0.0204934
-6.417	0.0451918	0.0323713		-5.022	0.0451075	0.0293925		-3.627	0.0368061	0.0193382
-6.324	0.044613	0.0326748		-4.929	0.0441471	0.0283134		-3.534	0.0357142	0.0188129
-6.231	0.043933	0.0331741		-4.836	0.042088	0.0272426		-3.441	0.0374628	0.0308254
-6.138	0.0440679	0.0353926		-4.743	0.0410526	0.0261395		-3.348	0.036165	0.0301372
-6.045	0.0440117	0.0349177		-4.65	0.0416545	0.0268051		-3.255	0.0353314	0.0301115
-5.952	0.0430009	0.0323556		-4.557	0.0406885	0.0257922		-3.162	0.0351071	0.0300769
-5.859	0.0430369	0.0312608		-4.464	0.0409124	0.0249845		-3.069	0.0352018	0.030151
-5.766	0.0437023	0.0323848		-4.371	0.0403992	0.0242232		-2.976	0.0357201	0.0310596
-5.673	0.0428503	0.0308487		-4.278	0.0397569	0.0232789		-2.883	0.0364297	0.0324191
-5.58	0.0434267	0.0348771		-4.185	0.0393444	0.0223113		-2.79	0.0374161	0.033513
-5.487	0.0426698	0.0336241		-4.092	0.0389241	0.0218252		-2.697	0.0386278	0.0350212
-5.394	0.0422476	0.0320911		-3.999	0.0383228	0.0218054		-2.604	0.0398004	0.0367366
-5.301	0.0412045	0.0303547		-3.906	0.0377868	0.0221684		-2.511	0.041292	0.0389627
-5.208	0.0411914	0.0313156		-3.813	0.037378	0.0229664		-2.418	0.043221	0.0414519
-5.115	0.0411405	0.0304645		-3.72	0.0363644	0.0239497		-2.325	0.045236	0.0436822
-5.022	0.04034	0.0279013		-3.627	0.0361822	0.024975		-2.232	0.047154	0.0458585
-4.929	0.038928	0.0251513		-3.534	0.0358627	0.0258565		-2.139	0.0494983	0.0484299
-4.836	0.0376438	0.0232131		-3.441	0.0357003	0.0267152		-2.046	0.0520273	0.0471577
-4.743	0.0366617	0.0217279		-3.348	0.0358634	0.0274954		-1.953	0.0543521	0.0462686
-4.65	0.0356202	0.0207728		-3.255	0.0366257	0.0287511		-1.86	0.056485	0.045387
-4.557	0.0348774	0.0197792		-3.162	0.0388555	0.0348257		-1.767	0.0586839	0.0450874
-4.464	0.0340575	0.0190712		-3.069	0.0396312	0.0359286		-1.674	0.061269	0.0450871
-4.371	0.0340247	0.0194891		-2.976	0.040829	0.0375955		-1.581	0.0639929	0.0457699
-4.278	0.0335754	0.0196177		-2.883	0.0422487	0.0395537		-1.488	0.0675199	0.0466097
-4.185	0.0331638	0.0199795		-2.79	0.0449358	0.0438431		-1.395	0.0711227	0.047773
-4.092	0.033246	0.0201383		-2.697	0.0466271	0.044482		-1.302	0.0754446	0.050251
-3.999	0.0336274	0.0208896		-2.604	0.0490144	0.04534		-1.209	0.0790707	0.0519905
-3.906	0.0350051	0.0258482		-2.511	0.0517654	0.0463349		-1.116	0.0823293	0.0544119
-3.813	0.0353401	0.0266773		-2.418	0.0546706	0.0462027		-1.023	0.0859507	0.0575655
-3.72	0.0360116	0.0278273		-2.325	0.0572769	0.0462977		-0.93	0.0905427	0.0599746
-3.627	0.0365003	0.0289368		-2.232	0.0595752	0.0471341		-0.837	0.0938792	0.0628576
-3.534	0.0371184	0.03054		-2.139	0.0628543	0.0489437		-0.744	0.0977226	0.0658557
-3.441	0.0378535	0.0322616		-2.046	0.0660569	0.0510507		-0.651	0.101679	0.0695733
-3.348	0.0388269	0.0342699		-1.953	0.0694704	0.0537952		-0.558	0.104806	0.0723588
-3.255	0.0399137	0.0364085		-1.86	0.0728419	0.0570788		-0.465	0.105884	0.0716137
-3.162	0.0410137	0.0358343		-1.767	0.0754421	0.0568024		-0.372	0.1078	0.0729618
-3.069	0.0423492	0.0356464		-1.674	0.0787213	0.0575122		-0.279	0.109518	0.0730513
-2.976	0.0440365	0.0356943		-1.581	0.0815201	0.0577181		-0.186	0.112924	0.0749312
-2.883	0.0458813	0.03608		-1.488	0.0840131	0.0580717		-0.093	0.114733	0.0754826
-2.79	0.0478702	0.036436		-1.395	0.0865311	0.057496		0	0.115971	0.0747099
-2.697	0.0503254	0.0371127		-1.302	0.0893155	0.0577308		0.093	0.11624	0.0745832
-2.604	0.0527366	0.0379777		-1.209	0.0914993	0.0583396		0.186	0.116291	0.0747198
-2.511	0.0551496	0.0390788		-1.116	0.0932448	0.059418		0.279	0.117521	0.0749416
-2.418	0.0576124	0.0406488		-1.023	0.0948675	0.0610397		0.372	0.118134	0.0763556
-2.325	0.0600955	0.0422048		-0.93	0.0966512	0.0635119		0.465	0.118836	0.0780955
-2.232	0.0623371	0.0416082		-0.837	0.0972969	0.0637008		0.558	0.120633	0.0799464
-2.139	0.0646959	0.0413898		-0.744	0.0981041	0.064322		0.651	0.122883	0.0821189
-2.046	0.0668463	0.0412745		-0.651	0.0985002	0.0647257		0.744	0.123496	0.0841002
-1.953	0.0689413	0.0414299		-0.558	0.0994462	0.0659625		0.837	0.124993	0.0851135
-1.86	0.0710136	0.0412463		-0.465	0.100265	0.0660482		0.93	0.126467	0.0865556
-1.767	0.0731853	0.04155		-0.372	0.1006	0.0669021		1.023	0.12943	0.088245
-1.674	0.0748315	0.0418407		-0.279	0.100966	0.0680759		1.116	0.130225	0.0884449
-1.581	0.0761582	0.0426675		-0.186	0.101841	0.0697527		1.209	0.130348	0.0888895
-1.488	0.077272	0.0437198		-0.093	0.102537	0.0718962		1.302	0.131459	0.0908714
-1.395	0.078627	0.0455345		0	0.10296	0.0746644		1.395	0.132523	0.0931438
-1.302	0.0795229	0.04647		0.093	0.102572	0.074548		1.488	0.133407	0.0910701
-1.209	0.0805369	0.0478069		0.186	0.102739	0.0743801		1.581	0.133029	0.0891872
-1.116	0.0814367	0.0494264		0.279	0.103269	0.0745477		1.674	0.132913	0.0877652
-1.023	0.082061	0.0503848		0.372	0.103011	0.0726246		1.767	0.132728	0.0856334
-0.93	0.0824568	0.0507927		0.465	0.103128	0.0704304		1.86	0.131213	0.0834733
-0.837	0.0822296	0.0508427		0.558	0.103477	0.0694881		1.953	0.130948	0.0818502
-0.744	0.0825486	0.051228		0.651	0.102968	0.0680338		2.046	0.130753	0.0815739
-0.651	0.0829058	0.0520132		0.744	0.103256	0.068286		2.139	0.131263	0.082597
-0.558	0.0832987	0.0533927		0.837	0.103367	0.0692296		2.232	0.130424	0.0813565
-0.465	0.0840307	0.055123		0.93	0.103785	0.0708871		2.325	0.131943	0.083247
-0.372	0.0844977	0.0548808		1.023	0.10502	0.0714188		2.418	0.134259	0.0840119
-0.279	0.0855879	0.0548732		1.116	0.106394	0.0717555		2.511	0.136329	0.0856403
-0.186	0.0872052	0.0561503		1.209	0.107905	0.0725416		2.604	0.137607	0.0864956
-0.093	0.0881924	0.0565682		1.302	0.10931	0.0738786		2.697	0.139155	0.0871061
0	0.0892863	0.0563936		1.395	0.110837	0.0740408		2.79	0.139984	0.0857045
0.093	0.090327	0.0569541		1.488	0.112082	0.074269		2.883	0.139874	0.0853568
0.186	0.0915604	0.0570886		1.581	0.113643	0.0751912		2.976	0.140258	0.0858535
0.279	0.0928477	0.0576559		1.674	0.115397	0.0768307		3.069	0.140526	0.0874995
0.372	0.0942008	0.0586872		1.767	0.116965	0.0783531		3.162	0.139858	0.0899288
0.465	0.0950221	0.0592688		1.86	0.118453	0.0806811		3.255	0.13863	0.0904214
0.558	0.0941264	0.0599666		1.953	0.114683	0.0768748		3.348	0.135074	0.086584
0.651	0.0949739	0.0608634		2.046	0.114817	0.0746178		3.441	0.133854	0.0856457
0.744	0.0959261	0.0617561		2.139	0.114818	0.0734482		3.534	0.132555	0.0840879
0.837	0.0969239	0.0628846		2.232	0.115496	0.0730069		3.627	0.131615	0.0821864
0.93	0.0982286	0.0640794		2.325	0.115646	0.0709228		3.72	0.132301	0.0814007
1.023	0.0985209	0.0645346		2.418	0.115581	0.0701651		3.813	0.131642	0.0819927
1.116	0.0990275	0.0652		2.511	0.115238	0.0689538		3.906	0.133049	0.0821433
1.209	0.0997137	0.0660524		2.604	0.114767	0.0687686		3.999	0.13337	0.0836932
1.302	0.0999851	0.0671706		2.697	0.113491	0.0691415		4.092	0.134926	0.0859256
1.395	0.0999538	0.0684879		2.79	0.112961	0.0708751		4.185	0.136783	0.0886459
1.488	0.0998232	0.0678564		2.883	0.113861	0.071606		4.278	0.13678	0.0865868
1.581	0.0997892	0.067271		2.976	0.113873	0.0703545		4.371	0.139035	0.0885814
1.674	0.0993154	0.06644		3.069	0.114571	0.0696946		4.464	0.139216	0.0869924
1.767	0.0993034	0.0658529		3.162	0.113815	0.0682078		4.557	0.142243	0.0870881
1.86	0.0996235	0.0651606		3.255	0.112869	0.0646295		4.65	0.142159	0.0848975
1.953	0.0990725	0.063707		3.348	0.113266	0.0662865		4.743	0.143897	0.0863005
2.046	0.0990579	0.0619213		3.441	0.114938	0.0670849		4.836	0.145126	0.0884666
2.139	0.0991901	0.0610297		3.534	0.116217	0.0679464		4.929	0.146105	0.0910033
2.232	0.0989782	0.0607363		3.627	0.117488	0.0701262		5.022	0.147412	0.0926324
2.325	0.0993535	0.0610361		3.72	0.117701	0.0721771		5.115	0.147306	0.0934932
2.418	0.100111	0.0617411		3.813	0.119393	0.0749468		5.208	0.141272	0.0869939
2.511	0.100687	0.0622356		3.906	0.121065	0.0766062		5.301	0.142414	0.088537
2.604	0.101188	0.0630353		3.999	0.122169	0.0771676		5.394	0.143643	0.0905242
2.697	0.101099	0.0637232		4.092	0.122949	0.0779314		5.487	0.144823	0.0902218
2.79	0.102078	0.0646846		4.185	0.123175	0.079223		5.58	0.144907	0.0898961
2.883	0.102486	0.0654578		4.278	0.123668	0.0805321		5.673	0.144684	0.0900058
2.976	0.10301	0.065965		4.371	0.12422	0.08161		5.766	0.146069	0.090002
3.069	0.103768	0.0667797		4.464	0.124486	0.0830784		5.859	0.147448	0.0912954
3.162	0.104795	0.0680159		4.557	0.124811	0.0852116		5.952	0.147894	0.0914373
3.255	0.10541	0.0695127		4.65	0.126092	0.0881453		6.045	0.146663	0.0898575
3.348	0.106488	0.0695511		4.743	0.124502	0.0840375		6.138	0.147249	0.0897926
3.441	0.106978	0.0695794		4.836	0.124975	0.0820153		6.231	0.149648	0.0907971
3.534	0.108315	0.0706592		4.929	0.125786	0.0807171		6.324	0.152288	0.0916806
3.627	0.109102	0.0714667		5.022	0.127211	0.0805023		6.417	0.154005	0.0910708
3.72	0.109475	0.0722545		5.115	0.126341	0.0782565		6.51	0.154241	0.0906406
3.813	0.108888	0.0723707		5.208	0.127158	0.0784053		6.603	0.156372	0.0924308
3.906	0.109583	0.0725119		5.301	0.127676	0.0773977		6.696	0.157485	0.0937479
3.999	0.110439	0.0731944		5.394	0.12947	0.079363		6.789	0.158812	0.0974008
4.092	0.110533	0.0740294		5.487	0.131373	0.0812355		6.882	0.160358	0.0991019
4.185	0.110534	0.0749938		5.58	0.132668	0.084366		6.975	0.162853	0.100498
4.278	0.110618	0.0746226		5.673	0.134271	0.0865783		7.068	0.164506	0.100519
4.371	0.111531	0.0742396		5.766	0.135615	0.0875681		7.161	0.165435	0.100151
4.464	0.112024	0.0738409		5.859	0.136452	0.087807		7.254	0.166688	0.0988418
4.557	0.112502	0.0738779		5.952	0.137057	0.0879654		7.347	0.16858	0.0985698
4.65	0.112818	0.0742555		6.045	0.137165	0.0887509		7.44	0.1705	0.0985444
4.743	0.112601	0.072674		6.138	0.13729	0.0900804		7.533	0.17164	0.0992272
4.836	0.112609	0.0717759		6.231	0.136116	0.0891528		7.626	0.173528	0.100312
4.929	0.113254	0.0715147		6.324	0.135668	0.089286		7.719	0.175186	0.102169
5.022	0.11357	0.0716785		6.417	0.135282	0.0890099		7.812	0.17373	0.102044
5.115	0.113197	0.0718749		6.51	0.135233	0.0897989		7.905	0.173884	0.102854
5.208	0.113813	0.0726703		6.603	0.135358	0.0896017		7.998	0.175024	0.1015
5.301	0.114141	0.0730148		6.696	0.135269	0.0886853		8.091	0.175	0.10112
5.394	0.114183	0.0730672		6.789	0.135622	0.0876487		8.184	0.174593	0.099336
5.487	0.113856	0.0733253		6.882	0.13499	0.0853918		8.277	0.173662	0.0990425
5.58	0.114024	0.0743091		6.975	0.13647	0.0846039		8.37	0.174264	0.0984368
5.673	0.113999	0.0745517		7.068	0.136	0.0833905		8.463	0.172421	0.0952466
5.766	0.115089	0.0752063		7.161	0.135303	0.0810012		8.556	0.172524	0.0922354
5.859	0.116156	0.0762671		7.254	0.136301	0.0822076		8.649	0.171564	0.0908302
5.952	0.117355	0.0776506		7.347	0.137356	0.0842358		8.742	0.169635	0.089739
6.045	0.11832	0.0787677		7.44	0.138039	0.0864082		8.835	0.167544	0.0859676
6.138	0.118827	0.0785086		7.533	0.141543	0.0854366		8.928	0.166855	0.0845927
6.231	0.11977	0.0793197		7.626	0.142976	0.0842501		9.021	0.169095	0.0858838
6.324	0.120498	0.0801755		7.719	0.144155	0.0828237		9.114	0.172833	0.0864837
6.417	0.121214	0.0806527		7.812	0.144532	0.0816869		9.207	0.174857	0.086406
6.51	0.121018	0.0792815		7.905	0.144831	0.0807462		9.3	0.177448	0.0875484
6.603	0.121179	0.078012		7.998	0.145406	0.0811465		9.393	0.179601	0.0911414
6.696	0.1208	0.0767745		8.091	0.144378	0.0785295		9.486	0.17968	0.0934193
6.789	0.12032	0.0759729		8.184	0.144033	0.0778139		9.579	0.181646	0.0966522
6.882	0.119674	0.0756705		8.277	0.145157	0.0794874		9.672	0.183598	0.101137
6.975	0.119245	0.076268		8.37	0.146033	0.0825803		9.765	0.181106	0.100374
7.068	0.118304	0.0741123		8.463	0.144865	0.0812713		9.858	0.184241	0.102186
7.161	0.118264	0.0741194		8.556	0.145144	0.0808647		9.951	0.18912	0.103385
7.254	0.118036	0.0747791		8.649	0.146447	0.0810106		10.044	0.181764	0.0971203
7.347	0.118126	0.0760253		8.742	0.147496	0.0815418		10.137	0.184729	0.101343
7.44	0.118246	0.0774092		8.835	0.149569	0.0818961		10.23	0.181887	0.102993
7.533	0.117815	0.0784524		8.928	0.152043	0.0829912		10.323	0.176349	0.100484
7.626	0.118716	0.0777708		9.021	0.154131	0.0845652		10.416	0.172546	0.0980591
7.719	0.119339	0.0773989		9.114	0.153394	0.083273		10.509	0.172779	0.101861
7.812	0.119554	0.0776703		9.207	0.154748	0.0849701		10.602	0.167518	0.103485
7.905	0.119164	0.0778459		9.3	0.156677	0.0877877		10.695	0.162401	0.103844
7.998	0.118787	0.074486		9.393	0.151058	0.0816296		10.788	0.160441	0.101478
8.091	0.118762	0.072998		9.486	0.153292	0.081604		10.881	0.158622	0.0965199
8.184	0.119295	0.0715294		9.579	0.153044	0.0824302		10.974	0.156957	0.0905349
8.277	0.119912	0.0707236		9.672	0.153538	0.0828999		11.067	0.152236	0.0858062
8.37	0.120348	0.0705976		9.765	0.153603	0.0848701		11.16	0.156982	0.0850906
8.463	0.120224	0.0714617		9.858	0.153907	0.086367		11.253	0.156635	0.0886594
8.556	0.120386	0.0726006		9.951	0.152157	0.0861498		11.346	0.155734	0.0897571
8.649	0.120936	0.0748104		10.044	0.152561	0.0864939		11.439	0.155092	0.0944444
8.742	0.122035	0.0766628		10.137	0.151927	0.0862695		11.532	0.158441	0.0999618
8.835	0.123454	0.079418		10.23	0.152443	0.0867437		11.625	0.162074	0.108679
8.928	0.12265	0.0772803		10.323	0.152968	0.0873519		11.718	0.163237	0.107604
9.021	0.123623	0.078442		10.416	0.15204	0.0851884		11.811	0.16647	0.111942
9.114	0.123698	0.0780072		10.509	0.151691	0.0852005		11.904	0.165449	0.09906
9.207	0.12343	0.0775827		10.602	0.153445	0.0847175		11.997	0.169395	0.0984095
9.3	0.122893	0.07697		10.695	0.153598	0.0849789		12.09	0.169373	0.0990363
9.393	0.123549	0.0769066		10.788	0.157673	0.0880802		12.183	0.158017	0.0863357
9.486	0.123361	0.076951		10.881	0.15479	0.0860567		12.276	0.153573	0.0829928
9.579	0.124624	0.0779134		10.974	0.157297	0.0886352		12.369	0.15698	0.0884699
9.672	0.124039	0.0793905		11.067	0.152611	0.0883572		12.462	0.158025	0.0908724
9.765	0.122845	0.0811452		11.16	0.150432	0.0897032		12.555	0.158145	0.0950696
9.858	0.123979	0.081003		11.253	0.149557	0.0935673		12.648	0.160672	0.0918386
9.951	0.123494	0.0809402		11.346	0.153586	0.093458		12.741	0.160433	0.0891621
10.044	0.124536	0.082031		11.439	0.155163	0.0933254		12.834	0.164334	0.0875217
10.137	0.124287	0.0821137		11.532	0.153768	0.0916214		12.927	0.171298	0.0829077
10.23	0.125016	0.0844948		11.625	0.153567	0.0915077		13.02	0.172032	0.083679
10.323	0.125641	0.0862851		11.718	0.15546	0.0958577		13.113	0.16999	0.0867803
10.416	0.128015	0.085639		11.811	0.151225	0.0900495		13.206	0.169562	0.0925353
10.509	0.129643	0.0853314		11.904	0.144227	0.0797787		13.299	0.170062	0.0977711
10.602	0.131147	0.0860002		11.997	0.145823	0.083702		13.392	0.163617	0.0978403
10.695	0.132696	0.087832		12.09	0.147512	0.0898477		13.485	0.168398	0.103505
10.788	0.132771	0.0858205		12.183	0.139439	0.0882961		13.578	0.11396	0.0759733
10.881	0.132181	0.0842565		12.276	0.138894	0.0894518		13.671	0.122853	0.0718692
10.974	0.129914	0.0785964		12.369	0.138634	0.0883247		13.764	0.113918	0.068742
11.067	0.128894	0.0749492		12.462	0.141179	0.087227		13.857	0.114992	0.0673616
11.16	0.12747	0.0723256		12.555	0.143723	0.0879166		13.95	0.116066	0.0709469
11.253	0.127047	0.0709246		12.648	0.150329	0.0932919
11.346	0.125885	0.0708301		12.741	0.154063	0.0967235
11.439	0.125622	0.0709124		12.834	0.156092	0.102782
11.532	0.125267	0.0726442		12.927	0.159831	0.108804
11.625	0.125384	0.07594		13.02	0.16393	0.115624
11.718	0.125437	0.0770953		13.113	0.153151	0.10553
11.811	0.125807	0.0779137		13.206	0.150684	0.11135
11.904	0.123968	0.0756383		13.299	0.166683	0.116628
11.997	0.125021	0.0727343		13.392	0.12384	0.0587945
12.09	0.125101	0.0738943		13.485	0.123819	0.0487362
12.183	0.125601	0.0746715		13.578	0.123798	0.0417309
12.276	0.126889	0.0737026		13.671	0.122384	0.0400696
12.369	0.125743	0.0728737		13.764	0.12097	0.0436219
12.462	0.125328	0.0722426		13.857	0.12419	0.0532706
12.555	0.125543	0.0739784		13.95	0.119171	0.064064
12.648	0.124217	0.0733478		14.043	0.11799	0.0616423
12.741	0.125908	0.0755447
12.834	0.126208	0.0715381
12.927	0.128971	0.0731176
13.02	0.131868	0.0763337
13.113	0.128122	0.0733888
13.206	0.127275	0.0720536
13.299	0.127144	0.072847
13.392	0.125833	0.0728262
13.485	0.125996	0.0760802
13.578	0.127397	0.0783804
13.671	0.117285	0.0689024
13.764	0.117578	0.0672683
13.857	0.119303	0.0656077
13.95	0.118277	0.06664
14.043	0.115988	0.0697002
14.136	0.112013	0.0707197
14.229	0.10994	0.0732714
14.322	0.111719	0.0762121
14.415	0.109827	0.0794505
14.508	0.113582	0.0769157
14.601	0.111062	0.0713081
14.694	0.115003	0.0704778
14.787	0.116262	0.0702972
14.88	0.119044	0.0714006
14.973	0.118759	0.0737117
15.066	0.122047	0.0801753
15.159	0.126682	0.0848459
15.252	0.134374	0.092499
15.345	0.140468	0.100364

## Sheet: ΔP=-0.1 M
pil1Δ				pil1Δ
Protoplats				Protoplats
Steady state in 0.4 M				ΔP=-0.1 M
				0 min
Speed (um/s)				Speed (um/s)
time	mean	stdev		time	mean	stdev
-6.138	0.093768	0.0974911		-14.322	0.0607651	0.0496903
-6.045	0.0760582	0.0612644		-14.229	0.0615983	0.0476007
-5.952	0.0738453	0.0550244		-14.136	0.0619287	0.0469629
-5.859	0.0716323	0.0501726		-14.043	0.0610117	0.0456271
-5.766	0.0671794	0.0467331		-13.95	0.0602375	0.0451715
-5.673	0.0623161	0.0433013		-13.857	0.0595497	0.0456705
-5.58	0.0604787	0.0432706		-13.764	0.058862	0.0471885
-5.487	0.0580829	0.0457787		-13.671	0.0580825	0.0496194
-5.394	0.0531996	0.0485745		-13.578	0.056623	0.0496122
-5.301	0.0510939	0.0532417		-13.485	0.05511	0.0506811
-5.208	0.0635986	0.097667		-13.392	0.067412	0.0599131
-5.115	0.0590203	0.0924408		-13.299	0.0650715	0.0558832
-5.022	0.0563547	0.0833224		-13.206	0.0627606	0.0520443
-4.929	0.0526612	0.0711473		-13.113	0.0610884	0.0479886
-4.836	0.0581375	0.0775075		-13.02	0.0592602	0.044156
-4.743	0.0621097	0.0736092		-12.927	0.0587841	0.0414551
-4.65	0.0594705	0.0650351		-12.834	0.0573904	0.0391912
-4.557	0.0624682	0.0701111		-12.741	0.0560775	0.0375394
-4.464	0.0588961	0.062905		-12.648	0.054987	0.0363912
-4.371	0.0551593	0.056708		-12.555	0.0538986	0.0356351
-4.278	0.0521749	0.0514783		-12.462	0.0528732	0.0351614
-4.185	0.0537217	0.0584957		-12.369	0.0521617	0.0335693
-4.092	0.0499421	0.0497132		-12.276	0.051808	0.0323064
-3.999	0.0472617	0.0429037		-12.183	0.0512855	0.0314222
-3.906	0.04819	0.0438583		-12.09	0.0513519	0.0307972
-3.813	0.045311	0.0395226		-11.997	0.0502881	0.0300304
-3.72	0.0477656	0.0488003		-11.904	0.0497046	0.0298448
-3.627	0.0500179	0.0534403		-11.811	0.0490514	0.0303714
-3.534	0.0492546	0.0530548		-11.718	0.0483777	0.0315882
-3.441	0.048118	0.0537648		-11.625	0.0476269	0.0334448
-3.348	0.0522422	0.0640105		-11.532	0.0469335	0.0358322
-3.255	0.0526619	0.0652501		-11.439	0.0471931	0.0364172
-3.162	0.0513075	0.060118		-11.346	0.0470838	0.0355119
-3.069	0.0523416	0.0579524		-11.253	0.0469476	0.0350898
-2.976	0.0514683	0.0535261		-11.16	0.0471246	0.035331
-2.883	0.0510536	0.0499799		-11.067	0.0469683	0.035798
-2.79	0.0504639	0.0471155		-10.974	0.0464669	0.036474
-2.697	0.0503306	0.0450063		-10.881	0.0464625	0.0375931
-2.604	0.0504111	0.0437815		-10.788	0.0463172	0.0393447
-2.511	0.0504971	0.043826		-10.695	0.0462816	0.0411626
-2.418	0.0501711	0.0442787		-10.602	0.0467003	0.043071
-2.325	0.0507106	0.0454674		-10.509	0.0459335	0.041402
-2.232	0.0525624	0.0471955		-10.416	0.0452017	0.0399464
-2.139	0.0564031	0.0510739		-10.323	0.0445635	0.0386283
-2.046	0.0574547	0.0500597		-10.23	0.0442875	0.0378418
-1.953	0.0583059	0.0467884		-10.137	0.044975	0.037786
-1.86	0.0596728	0.0439684		-10.044	0.0444107	0.0368369
-1.767	0.0613329	0.0416572		-9.951	0.043622	0.0362459
-1.674	0.0628514	0.0403757		-9.858	0.0431981	0.0360207
-1.581	0.0644583	0.0404546		-9.765	0.0426144	0.035508
-1.488	0.0663467	0.0420436		-9.672	0.0418607	0.0351517
-1.395	0.0679326	0.0440967		-9.579	0.0417281	0.034611
-1.302	0.0699394	0.0458925		-9.486	0.0418152	0.0343627
-1.209	0.0719559	0.0481741		-9.393	0.0418076	0.0342685
-1.116	0.0741542	0.0512362		-9.3	0.0418885	0.0343908
-1.023	0.0762158	0.0542204		-9.207	0.0420199	0.0345711
-0.93	0.0774022	0.0555984		-9.114	0.0421339	0.0350051
-0.837	0.0790433	0.0555384		-9.021	0.0423781	0.035688
-0.744	0.0801253	0.0559354		-8.928	0.0424427	0.0363479
-0.651	0.0836384	0.0606739		-8.835	0.0427128	0.0370431
-0.558	0.084093	0.0612416		-8.742	0.0426056	0.0379703
-0.465	0.0840568	0.060194		-8.649	0.0425223	0.0377881
-0.372	0.0877268	0.063832		-8.556	0.0422123	0.037781
-0.279	0.0896862	0.0638893		-8.463	0.0418676	0.0378895
-0.186	0.088759	0.0617123		-8.37	0.0413884	0.0381695
-0.093	0.087717	0.0598921		-8.277	0.0407424	0.03814
0	0.0878569	0.0575589		-8.184	0.0401084	0.0383591
0.093	0.0863143	0.0559447		-8.091	0.0394884	0.0387873
0.186	0.0864679	0.0557409		-7.998	0.0389763	0.0393553
0.279	0.0857313	0.0569617		-7.905	0.0384839	0.0401301
0.372	0.0854283	0.0596032		-7.812	0.0373404	0.0390404
0.465	0.0877468	0.0658379		-7.719	0.0370797	0.0369052
0.558	0.0873905	0.0646943		-7.626	0.0367987	0.0347752
0.651	0.0879097	0.0630917		-7.533	0.0364817	0.0328544
0.744	0.091348	0.066019		-7.44	0.0363258	0.0313284
0.837	0.0923805	0.0654792		-7.347	0.0360935	0.0298727
0.93	0.0939789	0.0630814		-7.254	0.0359676	0.0287798
1.023	0.0951249	0.0616693		-7.161	0.0359063	0.0281057
1.116	0.096128	0.0608429		-7.068	0.0357721	0.0278488
1.209	0.0996044	0.0628409		-6.975	0.0353814	0.0279487
1.302	0.100556	0.0629612		-6.882	0.0353952	0.0282845
1.395	0.10279	0.0637909		-6.789	0.0353117	0.0272762
1.488	0.104566	0.0652613		-6.696	0.0352271	0.0265983
1.581	0.1068	0.0643378		-6.603	0.0351807	0.0261903
1.674	0.107432	0.0619181		-6.51	0.0351895	0.0260947
1.767	0.106899	0.0608151		-6.417	0.035366	0.026165
1.86	0.106538	0.0608074		-6.324	0.0356407	0.0266952
1.953	0.106684	0.0604784		-6.231	0.0358464	0.0275834
2.046	0.106337	0.0621919		-6.138	0.0361763	0.0287668
2.139	0.105797	0.0652043		-6.045	0.036564	0.0302797
2.232	0.10579	0.0687872		-5.952	0.0367104	0.0318444
2.325	0.105205	0.0726114		-5.859	0.0369146	0.0310806
2.418	0.113075	0.0854892		-5.766	0.0372087	0.0307508
2.511	0.112044	0.0836854		-5.673	0.0374856	0.0307676
2.604	0.110087	0.0804682		-5.58	0.0377008	0.0310772
2.697	0.104997	0.0745576		-5.487	0.0376565	0.0308011
2.79	0.10425	0.0709166		-5.394	0.0376802	0.029873
2.883	0.102007	0.0681423		-5.301	0.0374977	0.0293298
2.976	0.10024	0.0660049		-5.208	0.0372526	0.0290544
3.069	0.0982883	0.0648385		-5.115	0.0369806	0.0291295
3.162	0.0962448	0.0645315		-5.022	0.0367232	0.029635
3.255	0.0943886	0.06483		-4.929	0.0369542	0.0288796
3.348	0.0947776	0.0638693		-4.836	0.0372512	0.0287035
3.441	0.0933616	0.0641821		-4.743	0.0374315	0.0282638
3.534	0.0924264	0.0656018		-4.65	0.037662	0.0284329
3.627	0.092257	0.0680365		-4.557	0.0381302	0.0288882
3.72	0.0947042	0.0720283		-4.464	0.0386861	0.0297013
3.813	0.0932672	0.0693692		-4.371	0.0392752	0.0309085
3.906	0.0920966	0.0677023		-4.278	0.0398396	0.0323799
3.999	0.0943839	0.0713993		-4.185	0.0403697	0.0342123
4.092	0.0930215	0.0711761		-4.092	0.0407651	0.0360302
4.185	0.0928123	0.0717753		-3.999	0.0407252	0.0343289
4.278	0.100003	0.0849184		-3.906	0.0405838	0.0327815
4.371	0.101639	0.0841336		-3.813	0.0404879	0.0314217
4.464	0.1035	0.0829347		-3.72	0.0403662	0.0304046
4.557	0.105108	0.0826896		-3.627	0.0399748	0.0291076
4.65	0.109143	0.0830098		-3.534	0.0398816	0.0284477
4.743	0.113412	0.081205		-3.441	0.0394746	0.0281061
4.836	0.116108	0.0799499		-3.348	0.0390921	0.0283494
4.929	0.118532	0.0808176		-3.255	0.0387503	0.0291194
5.022	0.121504	0.0824339		-3.162	0.0390073	0.030583
5.115	0.122572	0.0822566		-3.069	0.0390471	0.0298082
5.208	0.122988	0.0813606		-2.976	0.0391052	0.0292033
5.301	0.122406	0.0806908		-2.883	0.0391738	0.0285917
5.394	0.121744	0.0770346		-2.79	0.0392288	0.0280631
5.487	0.1201	0.0732959		-2.697	0.0396842	0.0281546
5.58	0.117798	0.0697403		-2.604	0.0401211	0.0284114
5.673	0.115343	0.0657502		-2.511	0.0407376	0.0290714
5.766	0.112683	0.0631765		-2.418	0.041309	0.0299251
5.859	0.111632	0.0612914		-2.325	0.0417405	0.0311285
5.952	0.107253	0.0605997		-2.232	0.0426793	0.0329865
6.045	0.105573	0.0605816		-2.139	0.0433035	0.0333957
6.138	0.105513	0.0614589		-2.046	0.0439196	0.0342117
6.231	0.105188	0.060759		-1.953	0.0445264	0.0355216
6.324	0.107439	0.0640642		-1.86	0.0452193	0.0372616
6.417	0.107007	0.0626281		-1.767	0.0451684	0.0382132
6.51	0.107201	0.0618787		-1.674	0.0456277	0.0396351
6.603	0.107226	0.0620231		-1.581	0.0456558	0.0403287
6.696	0.106167	0.063097		-1.488	0.045806	0.041546
6.789	0.10621	0.0653698		-1.395	0.0459647	0.0433114
6.882	0.106638	0.0682109		-1.302	0.0459839	0.0448087
6.975	0.10553	0.0707652		-1.209	0.0445645	0.0399812
7.068	0.107509	0.0826618		-1.116	0.0444193	0.0387301
7.161	0.106393	0.0802386		-1.023	0.0443511	0.0380028
7.254	0.104859	0.0775795		-0.93	0.0443619	0.0377565
7.347	0.105852	0.0750096		-0.837	0.0445054	0.0378648
7.44	0.10761	0.073288		-0.744	0.0446241	0.0380255
7.533	0.109391	0.07201		-0.651	0.044892	0.0385004
7.626	0.111043	0.0720502		-0.558	0.0450266	0.0392799
7.719	0.112694	0.0736529		-0.465	0.0452844	0.0405617
7.812	0.114194	0.0767632		-0.372	0.0455835	0.0419194
7.905	0.116807	0.0804423		-0.279	0.0465485	0.0414999
7.998	0.121091	0.0850801		-0.186	0.047321	0.0411655
8.091	0.124931	0.0901018		-0.093	0.0480139	0.0411036
8.184	0.128781	0.0931044		0	0.0486969	0.0415287
8.277	0.123976	0.079516		0.093	0.0495336	0.0425366
8.37	0.125503	0.0800658		0.186	0.0505232	0.0434014
8.463	0.129769	0.0853492		0.279	0.050881	0.0440058
8.556	0.131599	0.0863093		0.372	0.0512487	0.04515
8.649	0.133429	0.0886477		0.465	0.0514429	0.0467113
8.742	0.133679	0.0916607		0.558	0.0517067	0.0481956
8.835	0.133425	0.0898018		0.651	0.0519915	0.0465702
8.928	0.13363	0.0883385		0.744	0.0520527	0.0453718
9.021	0.13331	0.0845515		0.837	0.0523839	0.0447278
9.114	0.133675	0.0814719		0.93	0.0522471	0.0445916
9.207	0.134145	0.0807361		1.023	0.0525109	0.0450507
9.3	0.137221	0.078249		1.116	0.0537591	0.04743
9.393	0.136605	0.076545		1.209	0.0543546	0.0488346
9.486	0.134759	0.0754126		1.302	0.0549191	0.0506669
9.579	0.132912	0.0756567		1.395	0.0554625	0.0529466
9.672	0.130409	0.0770845		1.488	0.056035	0.0551593
9.765	0.130392	0.0786241		1.581	0.0562375	0.0548941
9.858	0.128454	0.0808019		1.674	0.0565329	0.0547362
9.951	0.126393	0.0764533		1.767	0.0570568	0.0549868
10.044	0.124446	0.0731899		1.86	0.0575335	0.0551796
10.137	0.122619	0.0704552		1.953	0.058052	0.0557471
10.23	0.122079	0.0700052		2.046	0.0585841	0.0568194
10.323	0.120536	0.0660276		2.139	0.0590362	0.0581235
10.416	0.122331	0.0671185		2.232	0.0596323	0.0597288
10.509	0.124125	0.0708309		2.325	0.0602129	0.0617285
10.602	0.126107	0.0766188		2.418	0.0596445	0.0612426
10.695	0.126738	0.0850351		2.511	0.0601171	0.0594095
10.788	0.126313	0.0919239		2.604	0.0604353	0.0578882
10.881	0.12155	0.0812292		2.697	0.0606761	0.0565692
10.974	0.128726	0.0830534		2.79	0.0607868	0.0556772
11.067	0.132174	0.0899886		2.883	0.061102	0.0554172
11.16	0.138303	0.0969728		2.976	0.0612289	0.0557297
11.253	0.140249	0.098003		3.069	0.0612589	0.0558755
11.346	0.140384	0.100485		3.162	0.0612149	0.0566583
11.439	0.141698	0.103772		3.255	0.0612588	0.0580575
11.532	0.148412	0.106127		3.348	0.0621506	0.0599319
11.625	0.1491	0.108861		3.441	0.0622111	0.0586493
11.718	0.150305	0.112487		3.534	0.0625404	0.0577409
11.811	0.139245	0.0967412		3.627	0.0628201	0.0572905
11.904	0.131119	0.0866061		3.72	0.0633335	0.0575651
11.997	0.131727	0.0838206		3.813	0.0632194	0.0580164
12.09	0.130036	0.0794861		3.906	0.0632744	0.0595269
12.183	0.113006	0.0604726		3.999	0.063818	0.0609015
12.276	0.111956	0.0580727		4.092	0.0646021	0.0628042
12.369	0.110906	0.0582288		4.185	0.0651802	0.0650982
12.462	0.110784	0.0608849		4.278	0.0641197	0.0632891
12.555	0.112918	0.0665281		4.371	0.0647359	0.062685
12.648	0.101739	0.0652244		4.464	0.0651574	0.0622485
12.741	0.08602	0.0245503		4.557	0.0657411	0.0625917
12.834	0.0879133	0.024633		4.65	0.0656518	0.0619963
12.927	0.0898067	0.0257916		4.743	0.0660925	0.0623451
13.02	0.086792	0.02809		4.836	0.0662825	0.0633261
13.113	0.087836	0.030582		4.929	0.0664964	0.06357
13.206	0.08888	0.0337348		5.022	0.0665287	0.0643656
13.299	0.089924	0.0373815		5.115	0.0666228	0.0659497
				5.208	0.0668322	0.0680924
				5.301	0.0661857	0.0655489
				5.394	0.066596	0.0642747
				5.487	0.0668413	0.063352
				5.58	0.0673852	0.063076
				5.673	0.0680694	0.0621208
				5.766	0.0683284	0.0616664
				5.859	0.0686436	0.0618433
				5.952	0.0689187	0.0625828
				6.045	0.0692365	0.0635707
				6.138	0.0692147	0.0647142
				6.231	0.0684387	0.0628948
				6.324	0.068648	0.0617377
				6.417	0.0689771	0.0616374
				6.51	0.0693675	0.0622222
				6.603	0.0699541	0.0639321
				6.696	0.0702233	0.066108
				6.789	0.0707456	0.068699
				6.882	0.0713876	0.0720202
				6.975	0.0720394	0.076018
				7.068	0.0719117	0.0789299
				7.161	0.0734906	0.0801927
				7.254	0.0714564	0.0713105
				7.347	0.0715574	0.0690029
				7.44	0.0715105	0.0669323
				7.533	0.0714272	0.0656295
				7.626	0.071214	0.0646326
				7.719	0.071361	0.0643669
				7.812	0.0714979	0.064912
				7.905	0.0715866	0.066086
				7.998	0.0715312	0.06797
				8.091	0.0722841	0.0682219
				8.184	0.0726574	0.067938
				8.277	0.0735945	0.0682443
				8.37	0.0746763	0.0691033
				8.463	0.0759347	0.070578
				8.556	0.0775009	0.0726267
				8.649	0.0785054	0.0737051
				8.742	0.0794057	0.0752627
				8.835	0.0800273	0.0767206
				8.928	0.0802441	0.077395
				9.021	0.0811483	0.0763272
				9.114	0.0801679	0.0724925
				9.207	0.0809553	0.0723096
				9.3	0.0817666	0.0729286
				9.393	0.082337	0.0739296
				9.486	0.0827905	0.0756758
				9.579	0.0825431	0.0777905
				9.672	0.0835056	0.0806033
				9.765	0.0843208	0.0837161
				9.858	0.084942	0.0866506
				9.951	0.0860736	0.0861877
				10.044	0.0864048	0.0844751
				10.137	0.0864238	0.0825463
				10.23	0.0862385	0.0809599
				10.323	0.0863761	0.0800623
				10.416	0.0859244	0.0793618
				10.509	0.0861132	0.0793985
				10.602	0.0859618	0.0803071
				10.695	0.0860209	0.0817103
				10.788	0.0863124	0.0836203
				10.881	0.0868251	0.0820083
				10.974	0.0874042	0.0807088
				11.067	0.0882929	0.0804588
				11.16	0.0893812	0.0807612
				11.253	0.0905482	0.0813932
				11.346	0.0917768	0.0821776
				11.439	0.0926457	0.0836044
				11.532	0.0935827	0.0859872
				11.625	0.0947401	0.0890242
				11.718	0.0955981	0.0920643
				11.811	0.0954701	0.0885334
				11.904	0.0970496	0.0887125
				11.997	0.0971812	0.0878793
				12.09	0.0986052	0.0888457
				12.183	0.100374	0.0908208
				12.276	0.100658	0.090427
				12.369	0.10017	0.0884265
				12.462	0.101867	0.0909185
				12.555	0.103147	0.0926754
				12.648	0.104136	0.0952314
				12.741	0.105789	0.0943883
				12.834	0.107336	0.093258
				12.927	0.108236	0.0930409
				13.02	0.108823	0.0929882
				13.113	0.108215	0.0929091
				13.206	0.108206	0.0935321
				13.299	0.108009	0.0943549
				13.392	0.107859	0.0961025
				13.485	0.108085	0.098858
				13.578	0.108118	0.102223
				13.671	0.105971	0.0965834
				13.764	0.105937	0.0940546
				13.857	0.105708	0.0922659
				13.95	0.106009	0.0911201
				14.043	0.106677	0.091689
				14.136	0.107363	0.0920606
				14.229	0.108131	0.0921177
				14.322	0.108967	0.0926083
				14.415	0.109494	0.0944596
				14.508	0.109981	0.096824
				14.601	0.110256	0.0935953
				14.694	0.111598	0.0921709
				14.787	0.113186	0.0914308
				14.88	0.114565	0.0911685
				14.973	0.115528	0.0906863
				15.066	0.116278	0.0917621
				15.159	0.117696	0.0939651
				15.252	0.11899	0.0962898
				15.345	0.118046	0.0956625
				15.438	0.120193	0.099304
				15.531	0.11902	0.0962049
				15.624	0.119807	0.0944713
				15.717	0.120824	0.0936018
				15.81	0.118995	0.092036
				15.903	0.119966	0.0936814
				15.996	0.121064	0.0964219
				16.089	0.122187	0.0995971
				16.182	0.122814	0.102721
				16.275	0.122809	0.106043
				16.368	0.123343	0.109268
				16.461	0.122649	0.106149
				16.554	0.122454	0.102593
				16.647	0.121923	0.099609
				16.74	0.120357	0.0959378
				16.833	0.119556	0.0933449
				16.926	0.118674	0.0918778
				17.019	0.115379	0.0864373
				17.112	0.114771	0.0865526
				17.205	0.114295	0.0882544
				17.298	0.113461	0.0903192
				17.391	0.113549	0.0851725
				17.484	0.114887	0.0838672
				17.577	0.117508	0.0837671
				17.67	0.117852	0.0820204
				17.763	0.119572	0.0843472
				17.856	0.122758	0.0884469
				17.949	0.123349	0.091493
				18.042	0.126407	0.0972526
				18.135	0.128184	0.103412
				18.228	0.129866	0.110272

## Sheet: ΔP=-0.2 M
pil1Δ				pil1Δ
Protoplats				Protoplats
Steady state in 0.4 M				ΔP=-0.2 M
				0 min
Speed (um/s)				Speed (um/s)
time	mean	stdev		time	mean	stdev
-6.138	0.093768	0.0974911		-12.462	0.0436724	0.0234898
-6.045	0.0760582	0.0612644		-12.369	0.0441191	0.0228572
-5.952	0.0738453	0.0550244		-12.276	0.0458274	0.0225026
-5.859	0.0716323	0.0501726		-12.183	0.0479905	0.0247621
-5.766	0.0671794	0.0467331		-12.09	0.0485008	0.0250113
-5.673	0.0623161	0.0433013		-11.997	0.0492422	0.025576
-5.58	0.0604787	0.0432706		-11.904	0.0496646	0.0271383
-5.487	0.0580829	0.0457787		-11.811	0.0504398	0.0289616
-5.394	0.0531996	0.0485745		-11.718	0.050596	0.0310688
-5.301	0.0510939	0.0532417		-11.625	0.0511055	0.0329204
-5.208	0.0635986	0.097667		-11.532	0.0478029	0.0309774
-5.115	0.0590203	0.0924408		-11.439	0.0472436	0.029379
-5.022	0.0563547	0.0833224		-11.346	0.046314	0.0279194
-4.929	0.0526612	0.0711473		-11.253	0.0454474	0.0267234
-4.836	0.0581375	0.0775075		-11.16	0.0469706	0.0326469
-4.743	0.0621097	0.0736092		-11.067	0.047456	0.0325889
-4.65	0.0594705	0.0650351		-10.974	0.0463244	0.0315082
-4.557	0.0624682	0.0701111		-10.881	0.0454606	0.0307836
-4.464	0.0588961	0.062905		-10.788	0.0450466	0.0308117
-4.371	0.0551593	0.056708		-10.695	0.0445358	0.0303618
-4.278	0.0521749	0.0514783		-10.602	0.0438774	0.0299855
-4.185	0.0537217	0.0584957		-10.509	0.0432273	0.0275578
-4.092	0.0499421	0.0497132		-10.416	0.0437036	0.0268692
-3.999	0.0472617	0.0429037		-10.323	0.0428866	0.0249182
-3.906	0.04819	0.0438583		-10.23	0.0424933	0.0242245
-3.813	0.045311	0.0395226		-10.137	0.0420772	0.0232486
-3.72	0.0477656	0.0488003		-10.044	0.0418001	0.0226318
-3.627	0.0500179	0.0534403		-9.951	0.0415995	0.0226608
-3.534	0.0492546	0.0530548		-9.858	0.0413249	0.0228839
-3.441	0.048118	0.0537648		-9.765	0.0414544	0.0242166
-3.348	0.0522422	0.0640105		-9.672	0.0406032	0.0244371
-3.255	0.0526619	0.0652501		-9.579	0.0416583	0.0303828
-3.162	0.0513075	0.060118		-9.486	0.0414185	0.0295309
-3.069	0.0523416	0.0579524		-9.393	0.0416009	0.0291072
-2.976	0.0514683	0.0535261		-9.3	0.0413549	0.0284905
-2.883	0.0510536	0.0499799		-9.207	0.0405655	0.027604
-2.79	0.0504639	0.0471155		-9.114	0.0401202	0.0269494
-2.697	0.0503306	0.0450063		-9.021	0.0398359	0.0267372
-2.604	0.0504111	0.0437815		-8.928	0.0394521	0.0267264
-2.511	0.0504971	0.043826		-8.835	0.0394433	0.0277202
-2.418	0.0501711	0.0442787		-8.742	0.0394997	0.0280501
-2.325	0.0507106	0.0454674		-8.649	0.0389872	0.0277534
-2.232	0.0525624	0.0471955		-8.556	0.0384148	0.0274814
-2.139	0.0564031	0.0510739		-8.463	0.0379957	0.0274372
-2.046	0.0574547	0.0500597		-8.37	0.0380549	0.0273698
-1.953	0.0583059	0.0467884		-8.277	0.0376936	0.026787
-1.86	0.0596728	0.0439684		-8.184	0.037139	0.0262458
-1.767	0.0613329	0.0416572		-8.091	0.0368547	0.026047
-1.674	0.0628514	0.0403757		-7.998	0.0363855	0.0258948
-1.581	0.0644583	0.0404546		-7.905	0.0366208	0.0264216
-1.488	0.0663467	0.0420436		-7.812	0.0362032	0.0265865
-1.395	0.0679326	0.0440967		-7.719	0.0360721	0.0259237
-1.302	0.0699394	0.0458925		-7.626	0.0361369	0.0259338
-1.209	0.0719559	0.0481741		-7.533	0.0361087	0.0263806
-1.116	0.0741542	0.0512362		-7.44	0.0361863	0.0270718
-1.023	0.0762158	0.0542204		-7.347	0.0363655	0.0275869
-0.93	0.0774022	0.0555984		-7.254	0.0363298	0.0284038
-0.837	0.0790433	0.0555384		-7.161	0.036276	0.0296842
-0.744	0.0801253	0.0559354		-7.068	0.0362859	0.031065
-0.651	0.0836384	0.0606739		-6.975	0.0363766	0.0325971
-0.558	0.084093	0.0612416		-6.882	0.036406	0.034201
-0.465	0.0840568	0.060194		-6.789	0.0366781	0.0356198
-0.372	0.0877268	0.063832		-6.696	0.0367059	0.0346798
-0.279	0.0896862	0.0638893		-6.603	0.0367677	0.0338386
-0.186	0.088759	0.0617123		-6.51	0.0368076	0.0330298
-0.093	0.087717	0.0598921		-6.417	0.03674	0.0321502
0	0.0878569	0.0575589		-6.324	0.0370521	0.0317951
0.093	0.0863143	0.0559447		-6.231	0.0372437	0.0315942
0.186	0.0864679	0.0557409		-6.138	0.0371827	0.0316253
0.279	0.0857313	0.0569617		-6.045	0.0370663	0.0318329
0.372	0.0854283	0.0596032		-5.952	0.0369373	0.032045
0.465	0.0877468	0.0658379		-5.859	0.0366261	0.03138
0.558	0.0873905	0.0646943		-5.766	0.0362208	0.0303463
0.651	0.0879097	0.0630917		-5.673	0.035707	0.0292801
0.744	0.091348	0.066019		-5.58	0.0351855	0.028356
0.837	0.0923805	0.0654792		-5.487	0.0347865	0.0270229
0.93	0.0939789	0.0630814		-5.394	0.0347185	0.0262449
1.023	0.0951249	0.0616693		-5.301	0.0345039	0.0259567
1.116	0.096128	0.0608429		-5.208	0.0343244	0.0261483
1.209	0.0996044	0.0628409		-5.115	0.0341187	0.026826
1.302	0.100556	0.0629612		-5.022	0.0341	0.0274896
1.395	0.10279	0.0637909		-4.929	0.0342183	0.0273714
1.488	0.104566	0.0652613		-4.836	0.0345722	0.0278872
1.581	0.1068	0.0643378		-4.743	0.0349551	0.0287363
1.674	0.107432	0.0619181		-4.65	0.0353274	0.0297136
1.767	0.106899	0.0608151		-4.557	0.035789	0.0300914
1.86	0.106538	0.0608074		-4.464	0.0361024	0.0299174
1.953	0.106684	0.0604784		-4.371	0.0363969	0.0301453
2.046	0.106337	0.0621919		-4.278	0.0366858	0.0306304
2.139	0.105797	0.0652043		-4.185	0.03691	0.0315103
2.232	0.10579	0.0687872		-4.092	0.0369665	0.0311277
2.325	0.105205	0.0726114		-3.999	0.0370788	0.0308059
2.418	0.113075	0.0854892		-3.906	0.0371353	0.0309351
2.511	0.112044	0.0836854		-3.813	0.0370932	0.0314072
2.604	0.110087	0.0804682		-3.72	0.0369746	0.032122
2.697	0.104997	0.0745576		-3.627	0.0369106	0.0318273
2.79	0.10425	0.0709166		-3.534	0.0368511	0.0317715
2.883	0.102007	0.0681423		-3.441	0.0369455	0.0322128
2.976	0.10024	0.0660049		-3.348	0.0371191	0.0332104
3.069	0.0982883	0.0648385		-3.255	0.0371603	0.0344298
3.162	0.0962448	0.0645315		-3.162	0.0375671	0.0355009
3.255	0.0943886	0.06483		-3.069	0.038039	0.0357995
3.348	0.0947776	0.0638693		-2.976	0.0384785	0.0365557
3.441	0.0933616	0.0641821		-2.883	0.0390068	0.0377039
3.534	0.0924264	0.0656018		-2.79	0.0396329	0.0391471
3.627	0.092257	0.0680365		-2.697	0.0401974	0.0387867
3.72	0.0947042	0.0720283		-2.604	0.0409071	0.0387662
3.813	0.0932672	0.0693692		-2.511	0.0417696	0.0391851
3.906	0.0920966	0.0677023		-2.418	0.0422246	0.0395886
3.999	0.0943839	0.0713993		-2.325	0.0430876	0.0407759
4.092	0.0930215	0.0711761		-2.232	0.0439706	0.0418931
4.185	0.0928123	0.0717753		-2.139	0.0449855	0.0426564
4.278	0.100003	0.0849184		-2.046	0.0460901	0.0439577
4.371	0.101639	0.0841336		-1.953	0.0472945	0.045927
4.464	0.1035	0.0829347		-1.86	0.0485663	0.0481152
4.557	0.105108	0.0826896		-1.767	0.0492064	0.0489144
4.65	0.109143	0.0830098		-1.674	0.0501341	0.0501931
4.743	0.113412	0.081205		-1.581	0.051187	0.0519469
4.836	0.116108	0.0799499		-1.488	0.0523595	0.05431
4.929	0.118532	0.0808176		-1.395	0.0534803	0.0570757
5.022	0.121504	0.0824339		-1.302	0.0529927	0.0545501
5.115	0.122572	0.0822566		-1.209	0.0542965	0.0550028
5.208	0.122988	0.0813606		-1.116	0.0554218	0.0556778
5.301	0.122406	0.0806908		-1.023	0.056449	0.0562082
5.394	0.121744	0.0770346		-0.93	0.0570327	0.0567007
5.487	0.1201	0.0732959		-0.837	0.0582954	0.0576279
5.58	0.117798	0.0697403		-0.744	0.0595243	0.059006
5.673	0.115343	0.0657502		-0.651	0.0607798	0.0599418
5.766	0.112683	0.0631765		-0.558	0.0619967	0.0611065
5.859	0.111632	0.0612914		-0.465	0.0631221	0.0626655
5.952	0.107253	0.0605997		-0.372	0.0632117	0.0620395
6.045	0.105573	0.0605816		-0.279	0.0641015	0.0617974
6.138	0.105513	0.0614589		-0.186	0.0650966	0.0621231
6.231	0.105188	0.060759		-0.093	0.0660563	0.0625321
6.324	0.107439	0.0640642		0	0.0671544	0.0633882
6.417	0.107007	0.0626281		0.093	0.0677748	0.0627668
6.51	0.107201	0.0618787		0.186	0.0684347	0.0624721
6.603	0.107226	0.0620231		0.279	0.0690761	0.0621317
6.696	0.106167	0.063097		0.372	0.0696583	0.0625576
6.789	0.10621	0.0653698		0.465	0.0705604	0.0635323
6.882	0.106638	0.0682109		0.558	0.0712236	0.0647887
6.975	0.10553	0.0707652		0.651	0.071341	0.0651371
7.068	0.107509	0.0826618		0.744	0.071728	0.0661068
7.161	0.106393	0.0802386		0.837	0.0721807	0.0675433
7.254	0.104859	0.0775795		0.93	0.07167	0.0677053
7.347	0.105852	0.0750096		1.023	0.072034	0.0681269
7.44	0.10761	0.073288		1.116	0.0720449	0.0690218
7.533	0.109391	0.07201		1.209	0.0725647	0.0695298
7.626	0.111043	0.0720502		1.302	0.0732427	0.0706892
7.719	0.112694	0.0736529		1.395	0.0736621	0.0718753
7.812	0.114194	0.0767632		1.488	0.0739059	0.072648
7.905	0.116807	0.0804423		1.581	0.0743118	0.0724809
7.998	0.121091	0.0850801		1.674	0.0754656	0.0726907
8.091	0.124931	0.0901018		1.767	0.0766909	0.0730963
8.184	0.128781	0.0931044		1.86	0.0770859	0.0725198
8.277	0.123976	0.079516		1.953	0.0773186	0.0704507
8.37	0.125503	0.0800658		2.046	0.0780621	0.0704578
8.463	0.129769	0.0853492		2.139	0.0792867	0.0714219
8.556	0.131599	0.0863093		2.232	0.0803796	0.0725986
8.649	0.133429	0.0886477		2.325	0.0818053	0.0744995
8.742	0.133679	0.0916607		2.418	0.0827336	0.0762057
8.835	0.133425	0.0898018		2.511	0.082788	0.0763344
8.928	0.13363	0.0883385		2.604	0.0831936	0.0771243
9.021	0.13331	0.0845515		2.697	0.0834352	0.0780419
9.114	0.133675	0.0814719		2.79	0.0828715	0.0781417
9.207	0.134145	0.0807361		2.883	0.0825353	0.0772865
9.3	0.137221	0.078249		2.976	0.0813565	0.0763215
9.393	0.136605	0.076545		3.069	0.0808426	0.0761618
9.486	0.134759	0.0754126		3.162	0.0805717	0.0766562
9.579	0.132912	0.0756567		3.255	0.0804715	0.0775971
9.672	0.130409	0.0770845		3.348	0.0807475	0.0782983
9.765	0.130392	0.0786241		3.441	0.0807595	0.0778321
9.858	0.128454	0.0808019		3.534	0.0809424	0.0775708
9.951	0.126393	0.0764533		3.627	0.0810837	0.0776509
10.044	0.124446	0.0731899		3.72	0.0804005	0.0763104
10.137	0.122619	0.0704552		3.813	0.0807604	0.0749507
10.23	0.122079	0.0700052		3.906	0.0808765	0.0742616
10.323	0.120536	0.0660276		3.999	0.0796847	0.0734328
10.416	0.122331	0.0671185		4.092	0.0797855	0.0736816
10.509	0.124125	0.0708309		4.185	0.0799219	0.0742166
10.602	0.126107	0.0766188		4.278	0.0791378	0.0734074
10.695	0.126738	0.0850351		4.371	0.0781599	0.0715977
10.788	0.126313	0.0919239		4.464	0.0779301	0.0712843
10.881	0.12155	0.0812292		4.557	0.0774469	0.0717627
10.974	0.128726	0.0830534		4.65	0.0777866	0.0727809
11.067	0.132174	0.0899886		4.743	0.0782471	0.0712443
11.16	0.138303	0.0969728		4.836	0.0789749	0.0707355
11.253	0.140249	0.098003		4.929	0.078748	0.0702095
11.346	0.140384	0.100485		5.022	0.0796449	0.0713044
11.439	0.141698	0.103772		5.115	0.0803476	0.0733126
11.532	0.148412	0.106127		5.208	0.0817824	0.0751952
11.625	0.1491	0.108861		5.301	0.0812816	0.0725834
11.718	0.150305	0.112487		5.394	0.082516	0.073864
11.811	0.139245	0.0967412		5.487	0.0836782	0.0759005
11.904	0.131119	0.0866061		5.58	0.0845804	0.0778601
11.997	0.131727	0.0838206		5.673	0.0848226	0.0786646
12.09	0.130036	0.0794861		5.766	0.0844983	0.0793909
12.183	0.113006	0.0604726		5.859	0.0849279	0.0806942
12.276	0.111956	0.0580727		5.952	0.0854366	0.0828706
12.369	0.110906	0.0582288		6.045	0.085785	0.0853376
12.462	0.110784	0.0608849		6.138	0.0853758	0.0855857
12.555	0.112918	0.0665281		6.231	0.0849635	0.0841072
12.648	0.101739	0.0652244		6.324	0.0853342	0.08389
12.741	0.08602	0.0245503		6.417	0.0858989	0.0842705
12.834	0.0879133	0.024633		6.51	0.0862283	0.0849455
12.927	0.0898067	0.0257916		6.603	0.0845839	0.0813869
13.02	0.086792	0.02809		6.696	0.0852281	0.0816865
13.113	0.087836	0.030582		6.789	0.0859399	0.0812177
13.206	0.08888	0.0337348		6.882	0.0865685	0.0812117
13.299	0.089924	0.0373815		6.975	0.086925	0.0817523
				7.068	0.0874169	0.0817812
				7.161	0.0875733	0.0807311
				7.254	0.0876437	0.0804011
				7.347	0.0876561	0.0804581
				7.44	0.0880156	0.0808157
				7.533	0.085811	0.078181
				7.626	0.0855752	0.0785014
				7.719	0.0857091	0.0787792
				7.812	0.0861134	0.0793961
				7.905	0.0858203	0.0803328
				7.998	0.0865247	0.0815383
				8.091	0.087255	0.0816617
				8.184	0.0883634	0.0819409
				8.277	0.0895215	0.0828726
				8.37	0.0908033	0.0835259
				8.463	0.09225	0.0841714
				8.556	0.0933776	0.0846183
				8.649	0.0943305	0.0854009
				8.742	0.0953609	0.0864218
				8.835	0.0961619	0.0878519
				8.928	0.0954839	0.0858313
				9.021	0.0972442	0.0869022
				9.114	0.0977259	0.0877043
				9.207	0.0969297	0.0867745
				9.3	0.0970427	0.0876462
				9.393	0.0949674	0.0855208
				9.486	0.0942047	0.08489
				9.579	0.0940065	0.084582
				9.672	0.0934412	0.0841597
				9.765	0.0935096	0.0851785
				9.858	0.0933786	0.0847023
				9.951	0.0940448	0.0849662
				10.044	0.0945441	0.0850287
				10.137	0.0959644	0.0863802
				10.23	0.0973065	0.0880432
				10.323	0.0975309	0.0871265
				10.416	0.0991878	0.0881805
				10.509	0.100288	0.0889134
				10.602	0.101507	0.0904681
				10.695	0.102514	0.0923508
				10.788	0.102962	0.0942028
				10.881	0.102333	0.0917733
				10.974	0.103185	0.0916121
				11.067	0.104265	0.0923963
				11.16	0.104307	0.0927581
				11.253	0.103673	0.0931089
				11.346	0.104109	0.0934124
				11.439	0.103548	0.0914905
				11.532	0.103754	0.0919316
				11.625	0.102854	0.0908503
				11.718	0.101554	0.0904529
				11.811	0.10229	0.0899231
				11.904	0.101879	0.0897363
				11.997	0.102293	0.0910166
				12.09	0.101341	0.0896745
				12.183	0.100907	0.0884557
				12.276	0.101407	0.0882216
				12.369	0.102237	0.0885854
				12.462	0.103163	0.089927
				12.555	0.10435	0.0922265
				12.648	0.102699	0.089291
				12.741	0.103263	0.0881111
				12.834	0.1042	0.0871567
				12.927	0.10503	0.0873549
				13.02	0.105685	0.0877781
				13.113	0.104131	0.0863794
				13.206	0.105754	0.0879287
				13.299	0.105459	0.0867724
				13.392	0.106601	0.0886819
				13.485	0.107973	0.0912502
				13.578	0.107981	0.0931135
				13.671	0.108046	0.0936554
				13.764	0.108696	0.093858
				13.857	0.109386	0.0948913
				13.95	0.110269	0.0965302
				14.043	0.109055	0.0966041
				14.136	0.109544	0.0978142
				14.229	0.110464	0.0979326
				14.322	0.11148	0.0989727
				14.415	0.112083	0.100949
				14.508	0.108405	0.0975471
				14.601	0.107393	0.0948155
				14.694	0.10814	0.0947307
				14.787	0.108953	0.0954811
				14.88	0.107373	0.0914766
				14.973	0.107856	0.0928616
				15.066	0.108728	0.0930472
				15.159	0.109514	0.0907617
				15.252	0.110382	0.0894167
				15.345	0.111295	0.0895138
				15.438	0.109374	0.0879373
				15.531	0.108119	0.0881603
				15.624	0.109863	0.0900026
				15.717	0.111552	0.0930506
				15.81	0.110574	0.0918554
				15.903	0.112185	0.0950903
				15.996	0.110347	0.0943805
				16.089	0.112194	0.0949569
				16.182	0.113979	0.0962079
				16.275	0.115948	0.0982119
				16.368	0.118286	0.101107
				16.461	0.119527	0.0999468
				16.554	0.119372	0.0960873
				16.647	0.119423	0.0935145
				16.74	0.120237	0.0928062
				16.833	0.121931	0.0935931
				16.926	0.120862	0.0930256
				17.019	0.11971	0.0891625
				17.112	0.122078	0.0912633
				17.205	0.124418	0.0936137
				17.298	0.126764	0.0973633
				17.391	0.131977	0.0983636
				17.484	0.132348	0.0963181
				17.577	0.13452	0.0962652
				17.67	0.136534	0.0976233
				17.763	0.139368	0.099053
				17.856	0.141806	0.101488
				17.949	0.143201	0.0992761
				18.042	0.143171	0.0974715
				18.135	0.143636	0.097269
				18.228	0.144428	0.0986239
				18.321	0.139447	0.0886332
				18.414	0.139571	0.0860935
				18.507	0.14029	0.0858811
				18.6	0.141305	0.0869559
				18.693	0.143513	0.0898869
				18.786	0.142293	0.0923424
				18.879	0.143311	0.0975762
				18.972	0.144724	0.101812
				19.065	0.145625	0.105819
				19.158	0.147376	0.112035
				19.251	0.148238	0.109091
				19.344	0.148413	0.106195
				19.437	0.146981	0.103485
				19.53	0.145377	0.101879
				19.623	0.143774	0.101565
				19.716	0.143528	0.103932
				19.809	0.144501	0.100367
				19.902	0.144613	0.101284
				19.995	0.142514	0.103359
				20.088	0.139771	0.106128
