# Supplementary material for: Rapid adaptation of endocytosis, exocytosis, and eisosomes after an acute increase in membrane tension in yeast cells
Source: eLife. 2021 May 13;10:e62084. doi: 10.7554/eLife.62084 (PMC9045820; doi:10.7554/eLife.62084)
Supplement: Figure 7—figure supplement 7—source data 1. [file elife-62084-fig7-figsupp7-data1.xlsx]

## Sheet: WT
WT				WT
Protoplats				Protoplats
Steady state in 0.25 M				ΔP=-0.1 M
				0 min
Speed (um/s)				Speed (um/s)
time	mean	stdev		time	mean	stdev
-5.766	0.0930614	0.0654407		-16.647	0.094556	0.0278872
-5.673	0.0961537	0.061158		-16.554	0.091484	0.0260348
-5.58	0.0919163	0.0582061		-16.461	0.088412	0.0243977
-5.487	0.0876787	0.0553737		-16.368	0.085606	0.0224358
-5.394	0.0834412	0.0526797		-16.275	0.0828	0.0207166
-5.301	0.0796712	0.0495274		-16.182	0.080418	0.0195839
-5.208	0.0754575	0.046961		-16.089	0.078036	0.0188466
-5.115	0.0712712	0.0445788		-15.996	0.075654	0.018552
-5.022	0.0828089	0.0597979		-15.903	0.073272	0.0187209
-4.929	0.0775344	0.0562861		-15.81	0.0596917	0.0306391
-4.836	0.0700533	0.0519426		-15.717	0.0759747	0.0504015
-4.743	0.0685129	0.0462447		-15.624	0.0755687	0.0479794
-4.65	0.0673963	0.0433989		-15.531	0.0751627	0.0458627
-4.557	0.0636389	0.0388289		-15.438	0.0751593	0.044041
-4.464	0.0600129	0.0357615		-15.345	0.075156	0.0426045
-4.371	0.056804	0.0327394		-15.252	0.0751413	0.0415928
-4.278	0.0549026	0.0303205		-15.159	0.0751267	0.0410387
-4.185	0.0528394	0.0307779		-15.066	0.0737363	0.0400165
-4.092	0.0501533	0.0280805		-14.973	0.0735044	0.0405208
-3.999	0.0485321	0.0268549		-14.88	0.0705623	0.0416796
-3.906	0.0463341	0.0259301		-14.787	0.0699329	0.0427943
-3.813	0.0453256	0.0246568		-14.694	0.0705676	0.0401598
-3.72	0.0456481	0.0240186		-14.601	0.0712023	0.0380056
-3.627	0.045114	0.0227328		-14.508	0.0712235	0.0361776
-3.534	0.0448645	0.0221713		-14.415	0.0712447	0.0350543
-3.441	0.0445901	0.0221915		-14.322	0.0712389	0.0336478
-3.348	0.0448243	0.0237539		-14.229	0.0713906	0.0340619
-3.255	0.0475745	0.0403403		-14.136	0.0715422	0.0352854
-3.162	0.0493496	0.046636		-14.043	0.0884084	0.0783431
-3.069	0.0494364	0.0468523		-13.95	0.0891805	0.0805593
-2.976	0.0494846	0.047428		-13.857	0.0901947	0.0828413
-2.883	0.0504246	0.0475		-13.764	0.0880705	0.0826464
-2.79	0.0515673	0.0474896		-13.671	0.0871935	0.0847298
-2.697	0.052732	0.0461771		-13.578	0.0875229	0.0847809
-2.604	0.0540385	0.0454852		-13.485	0.0870986	0.0871226
-2.511	0.0552988	0.0452016		-13.392	0.08634	0.0896737
-2.418	0.057405	0.0458037		-13.299	0.0850132	0.0901995
-2.325	0.0592131	0.0467324		-13.206	0.0860246	0.0895322
-2.232	0.0612401	0.0485314		-13.113	0.0851579	0.0922417
-2.139	0.0635109	0.0498418		-13.02	0.0828	0.0829338
-2.046	0.0660858	0.0519232		-12.927	0.079	0.0785408
-1.953	0.06832	0.0517322		-12.834	0.07474	0.0690175
-1.86	0.0713137	0.0522735		-12.741	0.0704285	0.0596302
-1.767	0.07473	0.0533807		-12.648	0.0656804	0.0504032
-1.674	0.078471	0.0547862		-12.555	0.0606897	0.040127
-1.581	0.0821364	0.0568525		-12.462	0.0559362	0.0317021
-1.488	0.0856138	0.0594749		-12.369	0.0514743	0.023728
-1.395	0.0891764	0.063156		-12.276	0.0471365	0.0174121
-1.302	0.0928981	0.0671343		-12.183	0.04261	0.0146564
-1.209	0.0971411	0.0712692		-12.09	0.040245	0.0130858
-1.116	0.100899	0.0759903		-11.997	0.0392722	0.0142925
-1.023	0.105614	0.0778969		-11.904	0.0429088	0.0242043
-0.93	0.109214	0.077422		-11.811	0.0455261	0.0266991
-0.837	0.112334	0.0766896		-11.718	0.0455661	0.0266636
-0.744	0.114838	0.0759283		-11.625	0.04576	0.0272941
-0.651	0.117312	0.076085		-11.532	0.0465549	0.028255
-0.558	0.119926	0.0772257		-11.439	0.0478871	0.0301378
-0.465	0.122509	0.0798854		-11.346	0.0487392	0.0316337
-0.372	0.12305	0.0813375		-11.253	0.0494511	0.0335679
-0.279	0.125083	0.0834904		-11.16	0.0494605	0.0343036
-0.186	0.126153	0.0860507		-11.067	0.0480558	0.0328582
-0.093	0.126224	0.0829526		-10.974	0.0472395	0.0315617
0	0.127874	0.0832435		-10.881	0.0464127	0.0309513
0.093	0.130229	0.0841649		-10.788	0.0455271	0.0306858
0.186	0.132518	0.0850894		-10.695	0.0451819	0.030713
0.279	0.134286	0.086813		-10.602	0.0454981	0.0311188
0.372	0.136232	0.0889563		-10.509	0.0451919	0.0321385
0.465	0.13809	0.0923481		-10.416	0.0443829	0.0309064
0.558	0.139774	0.0967997		-10.323	0.0437571	0.0298074
0.651	0.14205	0.101169		-10.23	0.0432174	0.0292685
0.744	0.142463	0.104236		-10.137	0.0430748	0.0290756
0.837	0.143855	0.104193		-10.044	0.0430579	0.0288216
0.93	0.144129	0.103074		-9.951	0.0431476	0.0286039
1.023	0.14162	0.100819		-9.858	0.045013	0.0289225
1.116	0.141261	0.099721		-9.765	0.0456248	0.0280769
1.209	0.141351	0.0989375		-9.672	0.0454609	0.0281365
1.302	0.141155	0.0980528		-9.579	0.0455402	0.0288325
1.395	0.13931	0.0956083		-9.486	0.0452905	0.0295946
1.488	0.137412	0.0937124		-9.393	0.0451339	0.0308073
1.581	0.13598	0.0921756		-9.3	0.0450768	0.0327109
1.674	0.134841	0.0908262		-9.207	0.044908	0.0351147
1.767	0.133608	0.0885916		-9.114	0.0448271	0.0371446
1.86	0.132123	0.0870645		-9.021	0.0448498	0.039717
1.953	0.132115	0.0863625		-8.928	0.044616	0.0419361
2.046	0.132277	0.0862017		-8.835	0.0455498	0.0442348
2.139	0.132633	0.0868856		-8.742	0.0466259	0.0462071
2.232	0.13299	0.0866694		-8.649	0.0471878	0.0484624
2.325	0.133026	0.0870471		-8.556	0.0492759	0.0511622
2.418	0.13285	0.0870813		-8.463	0.0508787	0.0539761
2.511	0.133146	0.0871279		-8.37	0.0526691	0.0579262
2.604	0.133723	0.0892484		-8.277	0.0545332	0.0623358
2.697	0.134983	0.0889172		-8.184	0.0565404	0.0670695
2.79	0.133694	0.0859545		-8.091	0.0586932	0.0719967
2.883	0.135086	0.0861206		-7.998	0.0596187	0.0720015
2.976	0.136996	0.0874104		-7.905	0.0606498	0.0729269
3.069	0.138576	0.09025		-7.812	0.0618457	0.0747166
3.162	0.139856	0.0904688		-7.719	0.0632968	0.0772783
3.255	0.14042	0.0917511		-7.626	0.0633268	0.0761922
3.348	0.142253	0.0932315		-7.533	0.063867	0.075449
3.441	0.144349	0.0958699		-7.44	0.0646019	0.0753069
3.534	0.141497	0.0961724		-7.347	0.0653832	0.075831
3.627	0.141445	0.0969988		-7.254	0.0630283	0.074952
3.72	0.140436	0.0954794		-7.161	0.0633317	0.0764094
3.813	0.140573	0.0965318		-7.068	0.0651024	0.0791677
3.906	0.137723	0.0923569		-6.975	0.0584353	0.0603969
3.999	0.137426	0.092587		-6.882	0.0594869	0.0607442
4.092	0.138385	0.0915065		-6.789	0.056785	0.0572195
4.185	0.138579	0.0914816		-6.696	0.0578536	0.0588532
4.278	0.137194	0.0901786		-6.603	0.0583382	0.0608185
4.371	0.136711	0.0907405		-6.51	0.058813	0.0630526
4.464	0.136909	0.0924477		-6.417	0.0594018	0.0654421
4.557	0.136222	0.0907248		-6.324	0.0598868	0.0678354
4.65	0.138533	0.0906779		-6.231	0.0597941	0.069584
4.743	0.140952	0.0904798		-6.138	0.0586361	0.0676471
4.836	0.143981	0.0905846		-6.045	0.05749	0.0652813
4.929	0.146249	0.0901599		-5.952	0.0562004	0.0631257
5.022	0.1493	0.0911951		-5.859	0.0548907	0.0610842
5.115	0.151636	0.0921443		-5.766	0.0537411	0.0595747
5.208	0.153635	0.0934733		-5.673	0.0528655	0.0582632
5.301	0.153932	0.0933185		-5.58	0.0517454	0.0568638
5.394	0.157261	0.0954636		-5.487	0.0502716	0.0556615
5.487	0.156559	0.0889096		-5.394	0.0495411	0.054431
5.58	0.15785	0.0855077		-5.301	0.0493266	0.0535575
5.673	0.159301	0.0840008		-5.208	0.0468537	0.051571
5.766	0.161418	0.0847918		-5.115	0.0473826	0.0526058
5.859	0.162749	0.0856488		-5.022	0.0480293	0.0541595
5.952	0.162747	0.0880444		-4.929	0.0474521	0.056139
6.045	0.162093	0.0903288		-4.836	0.0493702	0.0592012
6.138	0.161498	0.0947359		-4.743	0.0512788	0.062916
6.231	0.161427	0.100036		-4.65	0.0531109	0.0671859
6.324	0.158574	0.10375		-4.557	0.0552386	0.0708888
6.417	0.158657	0.10336		-4.464	0.0566798	0.0750305
6.51	0.157813	0.100507		-4.371	0.0578217	0.0805752
6.603	0.157416	0.0990311		-4.278	0.0591698	0.0854593
6.696	0.15426	0.0947699		-4.185	0.0597105	0.0864715
6.789	0.154508	0.0943726		-4.092	0.0602855	0.0881683
6.882	0.153813	0.0940206		-3.999	0.0503461	0.0611815
6.975	0.154092	0.0946746		-3.906	0.0491812	0.0567071
7.068	0.153626	0.0952986		-3.813	0.0480361	0.0527009
7.161	0.154355	0.0958108		-3.72	0.0438505	0.0454024
7.254	0.154759	0.0968722		-3.627	0.0425149	0.0417029
7.347	0.156955	0.0946437		-3.534	0.0414682	0.0396545
7.44	0.159815	0.0928898		-3.441	0.0412877	0.0381259
7.533	0.160415	0.0901625		-3.348	0.0408352	0.0372877
7.626	0.161839	0.090076		-3.255	0.0373182	0.0250121
7.719	0.162184	0.0905074		-3.162	0.0383436	0.0250825
7.812	0.162777	0.0916193		-3.069	0.039508	0.0268433
7.905	0.16367	0.0942227		-2.976	0.0405876	0.0302333
7.998	0.164029	0.0954153		-2.883	0.042466	0.0339693
8.091	0.165562	0.0966607		-2.79	0.0444237	0.0379363
8.184	0.166066	0.0968101		-2.697	0.046351	0.04212
8.277	0.16912	0.0915375		-2.604	0.0498456	0.0457921
8.37	0.167562	0.0861079		-2.511	0.0517861	0.0492758
8.463	0.167979	0.0832674		-2.418	0.0539242	0.0529909
8.556	0.168866	0.0830222		-2.325	0.0487697	0.038416
8.649	0.169836	0.0846443		-2.232	0.0499326	0.0396573
8.742	0.170988	0.0844136		-2.139	0.0512969	0.0409142
8.835	0.173995	0.0871493		-2.046	0.0519094	0.0419675
8.928	0.176578	0.091514		-1.953	0.0530803	0.0435444
9.021	0.178126	0.0934815		-1.86	0.0540239	0.0452023
9.114	0.179799	0.0971917		-1.767	0.0548231	0.0465432
9.207	0.174655	0.0860184		-1.674	0.0561443	0.0484402
9.3	0.175496	0.0821843		-1.581	0.0569109	0.0499299
9.393	0.176626	0.0805764		-1.488	0.0575414	0.0514345
9.486	0.175797	0.0806966		-1.395	0.0580443	0.0529741
9.579	0.176289	0.0821132		-1.302	0.0589003	0.0560212
9.672	0.175809	0.0828007		-1.209	0.0592657	0.0587754
9.765	0.175702	0.0860643		-1.116	0.0596311	0.0617638
9.858	0.176547	0.0875444		-1.023	0.0631086	0.0664442
9.951	0.180097	0.0901461		-0.93	0.0640525	0.0699988
10.044	0.180993	0.093936		-0.837	0.0654758	0.0737746
10.137	0.180238	0.0899019		-0.744	0.0634054	0.0756812
10.23	0.182558	0.0879293		-0.651	0.064586	0.0795432
10.323	0.179374	0.0812773		-0.558	0.0659471	0.0835712
10.416	0.1793	0.0822912		-0.465	0.067526	0.0876864
10.509	0.17995	0.0853136		-0.372	0.067872	0.0862964
10.602	0.177497	0.0880129		-0.279	0.068794	0.0843178
10.695	0.179286	0.0945511		-0.186	0.069716	0.0828629
10.788	0.179642	0.0996035		-0.093	0.0705834	0.0818438
10.881	0.172452	0.0949248		0	0.0713651	0.0795831
10.974	0.172568	0.103234		0.093	0.070928	0.07657
11.067	0.166672	0.0916145		0.186	0.0712591	0.0743955
11.16	0.166734	0.0888761		0.279	0.0725894	0.0741601
11.253	0.169208	0.0864369		0.372	0.0731018	0.074045
11.346	0.17018	0.0875281		0.465	0.0735812	0.0752262
11.439	0.170527	0.0885552		0.558	0.0746121	0.0783899
11.532	0.168297	0.0920524		0.651	0.0746106	0.0801451
11.625	0.168313	0.0943019		0.744	0.0746091	0.0827897
11.718	0.165082	0.0935729		0.837	0.0746127	0.0861175
11.811	0.169666	0.0943306		0.93	0.07395	0.0858501
11.904	0.172588	0.096974		1.023	0.073328	0.0847758
11.997	0.173738	0.0928735		1.116	0.0648703	0.067186
12.09	0.174363	0.0884412		1.209	0.0644559	0.0644121
12.183	0.174988	0.0855163		1.302	0.0640121	0.0621799
12.276	0.175349	0.0842784		1.395	0.0636468	0.0605934
12.369	0.176006	0.0840556		1.488	0.0638653	0.0601921
12.462	0.174652	0.0870081		1.581	0.0645997	0.0585194
12.555	0.172244	0.0863592		1.674	0.066423	0.0582544
12.648	0.172484	0.0897036		1.767	0.0672867	0.0582037
12.741	0.174017	0.0896536		1.86	0.0682727	0.0574933
12.834	0.171062	0.0916301		1.953	0.0679212	0.0561558
12.927	0.170595	0.087145		2.046	0.0671497	0.0555036
13.02	0.171259	0.0823497		2.139	0.0674873	0.05528
13.113	0.173913	0.0839877		2.232	0.0690387	0.0569265
13.206	0.179096	0.0884401		2.325	0.0696866	0.0594993
13.299	0.180547	0.0977129		2.418	0.0695209	0.0616806
13.392	0.174287	0.0960767		2.511	0.0695225	0.0635796
13.485	0.179955	0.105561		2.604	0.0695241	0.0664039
13.578	0.182904	0.116142		2.697	0.0697344	0.0698224
13.671	0.203535	0.12256		2.79	0.0698881	0.0735912
13.764	0.210079	0.135781		2.883	0.0719033	0.0761156
13.857	0.134776	0.0438993		2.976	0.0749979	0.0798374
13.95	0.138889	0.0498661		3.069	0.076837	0.0774658
14.043	0.143001	0.0568705		3.162	0.0786933	0.0760051
14.136	0.147114	0.0645757		3.255	0.0798797	0.0747209
14.229	0.156577	0.0773042		3.348	0.0814385	0.0746458
14.322	0.161803	0.086108		3.441	0.0828303	0.0752448
14.415	0.161817	0.0902892		3.534	0.0842221	0.076873
14.508	0.16183	0.0953478		3.627	0.0851797	0.0791296
14.601	0.161843	0.101152		3.72	0.0866094	0.0821322
14.694	0.161857	0.107582		3.813	0.0864291	0.0805462
				3.906	0.0846918	0.0782001
				3.999	0.0835042	0.0767237
				4.092	0.0824594	0.0758797
				4.185	0.0819688	0.0755243
				4.278	0.0818218	0.0762638
				4.371	0.0792641	0.0770327
				4.464	0.0774015	0.0768229
				4.557	0.0773426	0.0786261
				4.65	0.0780594	0.0821349
				4.743	0.078587	0.0841188
				4.836	0.0805645	0.0858913
				4.929	0.0824791	0.086317
				5.022	0.0843106	0.0870661
				5.115	0.0859609	0.0881002
				5.208	0.0873924	0.0886721
				5.301	0.0896573	0.0901544
				5.394	0.0916712	0.0919378
				5.487	0.0960262	0.0941865
				5.58	0.0946942	0.0949708
				5.673	0.091534	0.0939775
				5.766	0.090782	0.0938453
				5.859	0.0894877	0.092856
				5.952	0.0880463	0.0923506
				6.045	0.086425	0.0922585
				6.138	0.0844823	0.0927587
				6.231	0.0809887	0.0894894
				6.324	0.0780437	0.0861178
				6.417	0.0747537	0.0832865
				6.51	0.0722465	0.0792825
				6.603	0.07031	0.0777879
				6.696	0.0729535	0.0777348
				6.789	0.0635964	0.0618015
				6.882	0.0634304	0.0622407
				6.975	0.0640461	0.0633188
				7.068	0.0645986	0.0635908
				7.161	0.0666254	0.0643559
				7.254	0.0683929	0.0655262
				7.347	0.0705196	0.0666475
				7.44	0.0698584	0.0646295
				7.533	0.0705382	0.0638358
				7.626	0.0728054	0.062343
				7.719	0.074863	0.0615924
				7.812	0.0770333	0.0615838
				7.905	0.0786764	0.0611867
				7.998	0.0808309	0.0629138
				8.091	0.0826203	0.0646087
				8.184	0.0845903	0.0662656
				8.277	0.0859503	0.0697312
				8.37	0.0897273	0.0693549
				8.463	0.0909857	0.0729282
				8.556	0.0943011	0.0750513
				8.649	0.0976643	0.0785449
				8.742	0.100631	0.0833318
				8.835	0.103696	0.0892795
				8.928	0.106524	0.0953017
				9.021	0.1095	0.102347
				9.114	0.112275	0.109985
				9.207	0.115329	0.117903
				9.3	0.116348	0.117704
				9.393	0.116429	0.115833
				9.486	0.115108	0.112212
				9.579	0.113956	0.109186
				9.672	0.113111	0.106624
				9.765	0.111905	0.104445
				9.858	0.111067	0.10397
				9.951	0.110396	0.104296
				10.044	0.11022	0.105512
				10.137	0.10964	0.107655
				10.23	0.108528	0.105881
				10.323	0.108464	0.105279
				10.416	0.107642	0.106716
				10.509	0.108048	0.107598
				10.602	0.108583	0.108992
				10.695	0.109097	0.1094
				10.788	0.107912	0.106145
				10.881	0.106094	0.101762
				10.974	0.103669	0.09771
				11.067	0.10186	0.0941218
				11.16	0.101021	0.0892549
				11.253	0.0999323	0.0850721
				11.346	0.0937632	0.0769483
				11.439	0.0924641	0.073252
				11.532	0.0908221	0.0709462
				11.625	0.0895991	0.069757
				11.718	0.0896435	0.0689701
				11.811	0.0858036	0.066671
				11.904	0.0860267	0.0678882
				11.997	0.08502	0.070522
				12.09	0.0860903	0.0715524
				12.183	0.0861736	0.0714643
				12.276	0.0882679	0.0724022
				12.369	0.0906963	0.0750895
				12.462	0.0931294	0.0769737
				12.555	0.0950474	0.0804566
				12.648	0.0988071	0.0831718
				12.741	0.103043	0.086329
				12.834	0.108221	0.0912813
				12.927	0.113499	0.0967293
				13.02	0.117015	0.0979916
				13.113	0.123743	0.100859
				13.206	0.124628	0.101616
				13.299	0.125514	0.103341
				13.392	0.126437	0.105921
				13.485	0.127868	0.108987
				13.578	0.128192	0.109825
				13.671	0.128462	0.111339
				13.764	0.127428	0.110342
				13.857	0.126899	0.109478
				13.95	0.124711	0.10995
				14.043	0.11921	0.107878
				14.136	0.120981	0.106044
				14.229	0.122751	0.104642
				14.322	0.124135	0.103958
				14.415	0.12455	0.102778
				14.508	0.123503	0.0984004
				14.601	0.122735	0.0947582
				14.694	0.121311	0.0902019
				14.787	0.11952	0.08629
				14.88	0.120402	0.0841941
				14.973	0.121403	0.0850258
				15.066	0.122266	0.0851973
				15.159	0.123129	0.0873337
				15.252	0.124458	0.0907216
				15.345	0.126527	0.0957365
				15.438	0.130472	0.100687
				15.531	0.133954	0.106049
				15.624	0.13867	0.111114
				15.717	0.138952	0.116385
				15.81	0.131801	0.107483
				15.903	0.133173	0.105351
				15.996	0.134909	0.101998
				16.089	0.136646	0.09983
				16.182	0.138174	0.0990911
				16.275	0.138864	0.0988487
				16.368	0.139194	0.0993809
				16.461	0.137048	0.102284
				16.554	0.137615	0.105071
				16.647	0.138182	0.108879
				16.74	0.128775	0.110612
				16.833	0.131552	0.118112
				16.926	0.132272	0.115023
				17.019	0.132992	0.112726
				17.112	0.133675	0.111208
				17.205	0.136073	0.110473
				17.298	0.13658	0.113129
				17.391	0.138796	0.114864
				17.484	0.140644	0.11573
				17.577	0.142492	0.118046
				17.67	0.142754	0.115433
				17.763	0.142509	0.114318
				17.856	0.149453	0.112738
				17.949	0.150983	0.113224
				18.042	0.152472	0.115393
				18.135	0.151381	0.113256
				18.228	0.150474	0.112623
				18.321	0.149566	0.113646
				18.414	0.147078	0.110548
				18.507	0.144589	0.109106
				18.6	0.143119	0.105779
				18.693	0.142769	0.103309
				18.786	0.144467	0.0979676
				18.879	0.146166	0.094949
				18.972	0.147914	0.0944145
				19.065	0.150618	0.0962686
				19.158	0.152974	0.100447
				19.251	0.155329	0.106487
				19.344	0.161699	0.111939
				19.437	0.168068	0.118846
				19.53	0.171447	0.123896
				19.623	0.174015	0.130411
				19.716	0.174817	0.127986
				19.809	0.175619	0.126896
				19.902	0.178443	0.125169
				19.995	0.186035	0.126158
				20.088	0.189681	0.127084
				20.181	0.193328	0.129718
				20.274	0.189442	0.129995
				20.367	0.190024	0.129945
				20.46	0.181878	0.120478
				20.553	0.193541	0.11963

## Sheet: pil1Δ
pil1Δ				pil1Δ
Protoplats				Protoplats
Steady state in 0.25 M				ΔP=-0.1 M
				0 min
Speed (um/s)				Speed (um/s)
time	mean	stdev		time	mean	stdev
-5.301	0.08286	0.0572936		-18.414	0.06005	0.0474489
-5.208	0.079138	0.0502296		-18.321	0.059702	0.0469921
-5.115	0.075416	0.0435486		-18.228	0.059354	0.0465884
-5.022	0.071694	0.0374561		-18.135	0.059006	0.0462392
-4.929	0.0793086	0.0333089		-18.042	0.058658	0.0459458
-4.836	0.0742914	0.0293343		-17.949	0.05831	0.0457092
-4.743	0.0767846	0.0497942		-17.856	0.057962	0.0455303
-4.65	0.0713979	0.0420707		-17.763	0.057614	0.0454098
-4.557	0.0691805	0.0430503		-17.67	0.057318	0.0453271
-4.464	0.0720754	0.0467646		-17.577	0.057022	0.0453019
-4.371	0.0655528	0.0414285		-17.484	0.0786894	0.0641268
-4.278	0.0611493	0.0376022		-17.391	0.0770624	0.058281
-4.185	0.0613149	0.0494324		-17.298	0.0766341	0.0544493
-4.092	0.0552019	0.0434538		-17.205	0.0762059	0.0509656
-3.999	0.0527079	0.0379296		-17.112	0.0822456	0.053653
-3.906	0.0539464	0.0387451		-17.019	0.0801	0.0490392
-3.813	0.0531145	0.036129		-16.926	0.0823635	0.0471913
-3.72	0.0505997	0.032358		-16.833	0.080921	0.0445454
-3.627	0.0495046	0.0301205		-16.74	0.0867104	0.0641567
-3.534	0.0490093	0.0294549		-16.647	0.0853504	0.0560109
-3.441	0.047864	0.029381		-16.554	0.0828342	0.0522891
-3.348	0.0486642	0.0309354		-16.461	0.0773438	0.0462298
-3.255	0.048344	0.0319238		-16.368	0.0739334	0.0417619
-3.162	0.0486321	0.0335868		-16.275	0.0705231	0.0376742
-3.069	0.0481133	0.0352837		-16.182	0.0671128	0.0341034
-2.976	0.048422	0.035854		-16.089	0.0640462	0.0312128
-2.883	0.0480929	0.034865		-15.996	0.059554	0.0295849
-2.79	0.0484371	0.033533		-15.903	0.056896	0.0281633
-2.697	0.0486186	0.0324035		-15.81	0.05377	0.027233
-2.604	0.0497354	0.0316756		-15.717	0.053443	0.0265035
-2.511	0.0516738	0.0315681		-15.624	0.0515718	0.0259057
-2.418	0.0543938	0.0332496		-15.531	0.0500886	0.0237838
-2.325	0.0572997	0.0349941		-15.438	0.0497266	0.0221356
-2.232	0.0608435	0.0376876		-15.345	0.0493646	0.0211455
-2.139	0.066569	0.0484525		-15.252	0.0490026	0.0209073
-2.046	0.0705349	0.0510241		-15.159	0.0487	0.0214381
-1.953	0.075485	0.0542897		-15.066	0.0483486	0.022351
-1.86	0.079639	0.0541412		-14.973	0.0496022	0.025519
-1.767	0.0834086	0.0544316		-14.88	0.0488476	0.0270867
-1.674	0.0873714	0.0556352		-14.787	0.0481324	0.0287651
-1.581	0.0910799	0.0570463		-14.694	0.0475895	0.0306856
-1.488	0.0939068	0.0592031		-14.601	0.0466878	0.0300231
-1.395	0.0967934	0.0608798		-14.508	0.0473208	0.0296375
-1.302	0.0995264	0.0628575		-14.415	0.0479538	0.0297212
-1.209	0.102258	0.0658458		-14.322	0.0485867	0.0302703
-1.116	0.105149	0.0689623		-14.229	0.0482766	0.0313624
-1.023	0.108685	0.0727049		-14.136	0.0488578	0.0327235
-0.93	0.112772	0.0744269		-14.043	0.0540788	0.0495184
-0.837	0.115969	0.0764335		-13.95	0.054633	0.0483335
-0.744	0.119444	0.078757		-13.857	0.0555121	0.047412
-0.651	0.121577	0.0800748		-13.764	0.0561605	0.0468653
-0.558	0.12455	0.0820695		-13.671	0.0552561	0.0436452
-0.465	0.126897	0.0817802		-13.578	0.0597048	0.0521383
-0.372	0.128707	0.0820286		-13.485	0.0606244	0.0499855
-0.279	0.130557	0.0834261		-13.392	0.0595344	0.047374
-0.186	0.131994	0.0849926		-13.299	0.0587284	0.0452283
-0.093	0.132531	0.085688		-13.206	0.0568748	0.0440702
0	0.132002	0.0837126		-13.113	0.0565472	0.0435499
0.093	0.132153	0.0826372		-13.02	0.0562439	0.0442671
0.186	0.13228	0.0821761		-12.927	0.0560498	0.0460195
0.279	0.132403	0.0810833		-12.834	0.0560833	0.048275
0.372	0.133275	0.0800751		-12.741	0.0580252	0.0508311
0.465	0.134439	0.0804181		-12.648	0.059467	0.0506911
0.558	0.134911	0.0804998		-12.555	0.0613356	0.0522205
0.651	0.135229	0.0808137		-12.462	0.0632678	0.0548854
0.744	0.136856	0.0820653		-12.369	0.0656181	0.0578994
0.837	0.138391	0.0839457		-12.276	0.0671883	0.0620575
0.93	0.139229	0.0829953		-12.183	0.0672925	0.0652293
1.023	0.141938	0.0847294		-12.09	0.0685525	0.0692552
1.116	0.143738	0.0870732		-11.997	0.0680618	0.0712055
1.209	0.144318	0.0887833		-11.904	0.0688014	0.0749736
1.302	0.145504	0.0908655		-11.811	0.0680626	0.0731006
1.395	0.145716	0.0920449		-11.718	0.0671469	0.0698725
1.488	0.146437	0.0930731		-11.625	0.0667723	0.0682249
1.581	0.14565	0.0936583		-11.532	0.0664075	0.0674522
1.674	0.145637	0.0952383		-11.439	0.0660535	0.0675904
1.767	0.145999	0.0961115		-11.346	0.0657616	0.0685522
1.86	0.147452	0.0942315		-11.253	0.06562	0.070197
1.953	0.145449	0.0934288		-11.16	0.0652527	0.0725489
2.046	0.145482	0.0938333		-11.067	0.0651951	0.0754455
2.139	0.144338	0.0934593		-10.974	0.0650788	0.0773563
2.232	0.144775	0.0942455		-10.881	0.0623166	0.076958
2.325	0.145155	0.0948213		-10.788	0.0623676	0.0742276
2.418	0.142777	0.0940666		-10.695	0.0617418	0.0708774
2.511	0.142386	0.0959835		-10.602	0.0612126	0.0679119
2.604	0.141963	0.0977713		-10.509	0.0607038	0.06545
2.697	0.141346	0.0996628		-10.416	0.0601594	0.0634092
2.79	0.139467	0.096498		-10.323	0.0611684	0.0625548
2.883	0.139195	0.0963627		-10.23	0.0618488	0.0619279
2.976	0.137348	0.090741		-10.137	0.062581	0.0622167
3.069	0.135825	0.0894848		-10.044	0.0630996	0.0634733
3.162	0.136228	0.0881706		-9.951	0.0625292	0.0615972
3.255	0.137944	0.0872598		-9.858	0.0625551	0.0607263
3.348	0.138308	0.0870027		-9.765	0.0629127	0.0605734
3.441	0.139933	0.0875666		-9.672	0.0631645	0.061201
3.534	0.142664	0.08888		-9.579	0.0626715	0.0629882
3.627	0.144392	0.0906857		-9.486	0.0623482	0.064422
3.72	0.145393	0.089012		-9.393	0.0610282	0.0614241
3.813	0.14764	0.0895313		-9.3	0.059568	0.0589312
3.906	0.148318	0.0889054		-9.207	0.0579841	0.0569377
3.999	0.147866	0.0887365		-9.114	0.0567216	0.0553236
4.092	0.149421	0.0907336		-9.021	0.0562729	0.054319
4.185	0.152199	0.0935816		-8.928	0.0556996	0.0520393
4.278	0.151154	0.0922894		-8.835	0.0553696	0.0502972
4.371	0.152136	0.0958065		-8.742	0.0551176	0.0492135
4.464	0.152129	0.0984785		-8.649	0.0575282	0.051871
4.557	0.152838	0.101167		-8.556	0.0561978	0.0517191
4.65	0.151226	0.0980884		-8.463	0.0560284	0.0517529
4.743	0.152166	0.097177		-8.37	0.0559352	0.0516847
4.836	0.153042	0.0969877		-8.277	0.0560316	0.0525606
4.929	0.154823	0.096476		-8.184	0.0552967	0.0533583
5.022	0.154649	0.0956609		-8.091	0.0581851	0.0548597
5.115	0.156206	0.0945887		-7.998	0.0590311	0.0548718
5.208	0.156226	0.0946368		-7.905	0.0597243	0.0548435
5.301	0.157942	0.0948204		-7.812	0.0604474	0.0552791
5.394	0.159509	0.0959973		-7.719	0.0611704	0.0561889
5.487	0.160605	0.0971209		-7.626	0.0603769	0.0566286
5.58	0.159777	0.0959581		-7.533	0.0616867	0.0586995
5.673	0.159726	0.0965137		-7.44	0.0629981	0.0604948
5.766	0.160963	0.0981669		-7.347	0.0643426	0.0630595
5.859	0.161118	0.100406		-7.254	0.0650292	0.0643562
5.952	0.162262	0.102869		-7.161	0.0611742	0.0592516
6.045	0.163651	0.104389		-7.068	0.0616356	0.0587258
6.138	0.16649	0.1063		-6.975	0.0620056	0.0587388
6.231	0.168225	0.107193		-6.882	0.0623033	0.0593859
6.324	0.165666	0.102441		-6.789	0.062601	0.0606251
6.417	0.162984	0.0977346		-6.696	0.0630012	0.0623811
6.51	0.16571	0.095725		-6.603	0.0633913	0.0641943
6.603	0.167206	0.094162		-6.51	0.0641153	0.0670571
6.696	0.168404	0.0938609		-6.417	0.0649894	0.0702996
6.789	0.169026	0.0933036		-6.324	0.0663251	0.0735646
6.882	0.168433	0.0922528		-6.231	0.0679287	0.0730772
6.975	0.169418	0.092554		-6.138	0.0692038	0.0720514
7.068	0.169342	0.0940496		-6.045	0.0705232	0.0719146
7.161	0.170236	0.096226		-5.952	0.0718328	0.0726902
7.254	0.171747	0.0978548		-5.859	0.0731424	0.0743445
7.347	0.173499	0.0995903		-5.766	0.0694912	0.0693456
7.44	0.172551	0.0988365		-5.673	0.0704665	0.0722536
7.533	0.171253	0.0966062		-5.58	0.071311	0.0758846
7.626	0.168926	0.0958197		-5.487	0.0719052	0.0802024
7.719	0.167767	0.0943867		-5.394	0.0705537	0.0839315
7.812	0.16685	0.0926315		-5.301	0.0579372	0.0671072
7.905	0.166702	0.0901573		-5.208	0.0582422	0.0669497
7.998	0.166825	0.0880374		-5.115	0.0584228	0.0663826
8.091	0.166298	0.0874196		-5.022	0.058753	0.0667888
8.184	0.165494	0.0876631		-4.929	0.0590832	0.0674939
8.277	0.164597	0.0892282		-4.836	0.0595753	0.068403
8.37	0.166256	0.0904392		-4.743	0.0555402	0.0630286
8.463	0.16884	0.091643		-4.65	0.0497731	0.0487122
8.556	0.171508	0.0943453		-4.557	0.0503793	0.0491274
8.649	0.174927	0.0975931		-4.464	0.0518531	0.0497875
8.742	0.175953	0.0959248		-4.371	0.055252	0.0529989
8.835	0.174854	0.0916702		-4.278	0.0575064	0.0566287
8.928	0.175826	0.0915182		-4.185	0.0597268	0.0614241
9.021	0.175609	0.0915623		-4.092	0.0620086	0.0671476
9.114	0.178333	0.0914808		-3.999	0.0642904	0.0736047
9.207	0.179634	0.0932849		-3.906	0.0667004	0.0805638
9.3	0.173725	0.0881663		-3.813	0.0690604	0.0879823
9.393	0.173059	0.0866527		-3.72	0.0711457	0.0958058
9.486	0.168366	0.0824802		-3.627	0.0724934	0.102657
9.579	0.166592	0.0823606		-3.534	0.072413	0.102246
9.672	0.165208	0.0812608		-3.441	0.0705193	0.0964991
9.765	0.163236	0.0808277		-3.348	0.069292	0.0910694
9.858	0.159094	0.080722		-3.255	0.0683348	0.0860433
9.951	0.157437	0.0821415		-3.162	0.0673732	0.0816532
10.044	0.156559	0.0844786		-3.069	0.0664116	0.0780015
10.137	0.156238	0.0864769		-2.976	0.0652102	0.0751425
10.23	0.154556	0.0853308		-2.883	0.0641077	0.0731334
10.323	0.155103	0.0877775		-2.79	0.0633809	0.0720051
10.416	0.159953	0.0873613		-2.697	0.0632714	0.0714147
10.509	0.16025	0.088175		-2.604	0.0646018	0.0705359
10.602	0.160344	0.0876106		-2.511	0.0671336	0.0721402
10.695	0.160639	0.0861294		-2.418	0.0688784	0.0734279
10.788	0.159913	0.0849457		-2.325	0.0707114	0.0754676
10.881	0.161022	0.085342		-2.232	0.0724359	0.0781519
10.974	0.160421	0.0873732		-2.139	0.0741605	0.0814493
11.067	0.164595	0.0889241		-2.046	0.0760786	0.085171
11.16	0.160809	0.0888434		-1.953	0.077908	0.0894138
11.253	0.162806	0.0916281		-1.86	0.0795484	0.0937701
11.346	0.164299	0.0956278		-1.767	0.0718855	0.0830844
11.439	0.164103	0.0982902		-1.674	0.0725295	0.0837785
11.532	0.171026	0.102468		-1.581	0.0623223	0.0675389
11.625	0.173822	0.0997964		-1.488	0.064287	0.0687402
11.718	0.179302	0.104411		-1.395	0.0660328	0.0689711
11.811	0.184422	0.111782		-1.302	0.0700698	0.0704781
11.904	0.187043	0.113507		-1.209	0.0718429	0.0723077
11.997	0.186078	0.116021		-1.116	0.0740583	0.0749835
12.09	0.183769	0.113161		-1.023	0.0763983	0.0784399
12.183	0.178925	0.119354		-0.93	0.0785322	0.0814825
12.276	0.180491	0.122882		-0.837	0.0762585	0.0816043
12.369	0.165461	0.110876		-0.744	0.0781412	0.0854948
12.462	0.166091	0.106912		-0.651	0.06953	0.0629172
12.555	0.166581	0.105458		-0.558	0.0697364	0.0623035
12.648	0.159401	0.0945619		-0.465	0.0698549	0.0611374
12.741	0.161368	0.0942147		-0.372	0.069741	0.0606251
12.834	0.167886	0.0979315		-0.279	0.0697808	0.060767
12.927	0.172436	0.102438		-0.186	0.0696895	0.0618441
13.02	0.180305	0.109674		-0.093	0.069641	0.0635705
13.113	0.194113	0.11246		0	0.0702272	0.0660121
13.206	0.19896	0.12048		0.093	0.06842	0.0679391
13.299	0.202274	0.12799		0.186	0.0689105	0.0694831
13.392	0.192862	0.12284		0.279	0.0690618	0.0710858
13.485	0.193512	0.114876		0.372	0.0698218	0.0732967
13.578	0.194162	0.107974		0.465	0.0707008	0.0761187
13.671	0.194812	0.102348		0.558	0.0718153	0.079192
13.764	0.193801	0.096652		0.651	0.0729184	0.0826069
13.857	0.1926	0.0926604		0.744	0.0734582	0.080327
13.95	0.189708	0.0922238		0.837	0.0741879	0.0787755
14.043	0.18894	0.0913095		0.93	0.0743458	0.0774703
14.136	0.184412	0.0942636		1.023	0.0753713	0.0751703
14.229	0.182574	0.09857		1.116	0.0756255	0.0754294
14.322	0.194137	0.0830741		1.209	0.0765447	0.0758275
14.415	0.190247	0.0815232		1.302	0.077328	0.0762183
14.508	0.186357	0.0806774		1.395	0.0774945	0.0740478
14.601	0.18996	0.0863182		1.488	0.077345	0.0728117
14.694	0.188124	0.0857884		1.581	0.0771272	0.0724252
				1.674	0.0765775	0.0722262
				1.767	0.0752215	0.0707025
				1.86	0.074066	0.0697746
				1.953	0.0727605	0.0692945
				2.046	0.071369	0.0674387
				2.139	0.0690372	0.0645531
				2.232	0.0670373	0.0623069
				2.325	0.0659798	0.0608912
				2.418	0.0651438	0.0599109
				2.511	0.064661	0.0596739
				2.604	0.0646435	0.0597617
				2.697	0.0654042	0.0603519
				2.79	0.0655343	0.0597779
				2.883	0.0663802	0.0581787
				2.976	0.0656753	0.0576867
				3.069	0.0667488	0.0581171
				3.162	0.0674261	0.0576451
				3.255	0.0683867	0.0586875
				3.348	0.0693267	0.0605761
				3.441	0.0698949	0.0624956
				3.534	0.0682371	0.0640438
				3.627	0.0691021	0.0676867
				3.72	0.0695266	0.072414
				3.813	0.0712734	0.0770169
				3.906	0.0735568	0.0812612
				3.999	0.0712287	0.0811343
				4.092	0.0735792	0.0847737
				4.185	0.074487	0.081156
				4.278	0.075407	0.0784296
				4.371	0.075151	0.0761503
				4.464	0.0770005	0.0759301
				4.557	0.0780942	0.0748892
				4.65	0.0790466	0.0753996
				4.743	0.0783983	0.0763011
				4.836	0.0793807	0.0788293
				4.929	0.0798651	0.0826624
				5.022	0.0804954	0.0865782
				5.115	0.0826777	0.0905358
				5.208	0.0839743	0.0940893
				5.301	0.0862815	0.0984573
				5.394	0.09086	0.0997207
				5.487	0.091799	0.0994348
				5.58	0.0934571	0.100964
				5.673	0.0952376	0.10212
				5.766	0.098936	0.103715
				5.859	0.100221	0.105661
				5.952	0.101367	0.107277
				6.045	0.102709	0.110035
				6.138	0.103969	0.113564
				6.231	0.103479	0.112161
				6.324	0.104524	0.112184
				6.417	0.103986	0.108656
				6.51	0.103408	0.106
				6.603	0.104135	0.101944
				6.696	0.103969	0.100047
				6.789	0.103827	0.0991297
				6.882	0.103304	0.0980659
				6.975	0.102392	0.0970641
				7.068	0.103134	0.0976205
				7.161	0.103173	0.098472
				7.254	0.102048	0.0961975
				7.347	0.102198	0.0950839
				7.44	0.102415	0.0943981
				7.533	0.101814	0.0947266
				7.626	0.102585	0.0929619
				7.719	0.106629	0.0916412
				7.812	0.109599	0.090866
				7.905	0.113155	0.0918936
				7.998	0.116712	0.0937958
				8.091	0.120739	0.0964447
				8.184	0.124971	0.100428
				8.277	0.128601	0.103305
				8.37	0.132018	0.10713
				8.463	0.13468	0.111046
				8.556	0.136095	0.110215
				8.649	0.136915	0.10964
				8.742	0.137115	0.10932
				8.835	0.136865	0.109376
				8.928	0.136584	0.110808
				9.021	0.135369	0.112183
				9.114	0.133361	0.111689
				9.207	0.131735	0.112743
				9.3	0.130414	0.114799
				9.393	0.130364	0.116699
				9.486	0.130976	0.112622
				9.579	0.129972	0.107913
				9.672	0.132316	0.103359
				9.765	0.127167	0.0968447
				9.858	0.126656	0.0954346
				9.951	0.12688	0.0957958
				10.044	0.128334	0.0982241
				10.137	0.128895	0.0997979
				10.23	0.129134	0.103081
				10.323	0.12777	0.106752
				10.416	0.125738	0.107847
				10.509	0.126494	0.106844
				10.602	0.127066	0.104373
				10.695	0.127289	0.102494
				10.788	0.127591	0.101756
				10.881	0.128245	0.102654
				10.974	0.127221	0.10475
				11.067	0.129345	0.107133
				11.16	0.132055	0.11056
				11.253	0.136101	0.11438
				11.346	0.140387	0.118552
				11.439	0.143269	0.121933
				11.532	0.139567	0.119389
				11.625	0.141547	0.121434
				11.718	0.144673	0.123947
				11.811	0.146601	0.124759
				11.904	0.152834	0.125738
				11.997	0.153197	0.123284
				12.09	0.152797	0.122482
				12.183	0.153384	0.122552
				12.276	0.154173	0.121809
				12.369	0.149243	0.118697
				12.462	0.150092	0.122679
				12.555	0.153549	0.126799
				12.648	0.145941	0.117117
				12.741	0.148645	0.121245
				12.834	0.151136	0.123289
				12.927	0.154148	0.123845
				13.02	0.157964	0.124647
				13.113	0.158893	0.123189
				13.206	0.158214	0.118028
				13.299	0.156792	0.113465
				13.392	0.155622	0.108932
				13.485	0.153504	0.104777
				13.578	0.151387	0.101927
				13.671	0.145971	0.100177
				13.764	0.139942	0.0982524
				13.857	0.136896	0.0974609
				13.95	0.135036	0.097771
				14.043	0.135565	0.0997372
				14.136	0.136263	0.101047
				14.229	0.141305	0.103919
				14.322	0.141367	0.103655
				14.415	0.142701	0.1046
				14.508	0.144034	0.107595
				14.601	0.145368	0.112478
				14.694	0.148913	0.118994
				14.787	0.139649	0.111799
				14.88	0.13985	0.113746
				14.973	0.139855	0.114466
				15.066	0.144127	0.112876
				15.159	0.136502	0.100514
				15.252	0.141583	0.0994114
				15.345	0.145311	0.0977846
				15.438	0.14904	0.0973844
				15.531	0.152769	0.0982259
				15.624	0.156498	0.100278
				15.717	0.160226	0.103468
				15.81	0.166627	0.107499
				15.903	0.159558	0.102569
				15.996	0.163609	0.105139
				16.089	0.17059	0.105657
				16.182	0.162228	0.0999955
				16.275	0.166441	0.1043
				16.368	0.170653	0.110056
				16.461	0.174865	0.11705
				16.554	0.179077	0.125075
				16.647	0.183289	0.133945
				16.74	0.182271	0.136147
				16.833	0.180382	0.139288
				16.926	0.178497	0.129587
				17.019	0.176681	0.12064
				17.112	0.174864	0.112779
				17.205	0.171959	0.105123
				17.298	0.169053	0.0987938
				17.391	0.166148	0.0940606
				17.484	0.163242	0.0911719
				17.577	0.160337	0.0903048
				17.67	0.161302	0.0930244
				17.763	0.165958	0.0947285
				17.856	0.167268	0.0930276
				17.949	0.168186	0.0903181
				18.042	0.166154	0.0918706
				18.135	0.167514	0.094079
				18.228	0.168874	0.098507
				18.321	0.170234	0.104874
				18.414	0.171594	0.112852
				18.507	0.178034	0.129335
				18.6	0.175585	0.133291
				18.693	0.167424	0.135776
				18.786	0.200972	0.157534
