# Supplementary material for: Rapid adaptation of endocytosis, exocytosis, and eisosomes after an acute increase in membrane tension in yeast cells
Source: eLife. 2021 May 13;10:e62084. doi: 10.7554/eLife.62084 (PMC9045820; doi:10.7554/eLife.62084)
Supplement: Figure 7—source data 1. [file elife-62084-fig7-data1.xlsx]

## Sheet: ΔP=-0.05 M
WT				WT				WT
Protoplats				Protoplats				Protoplats
Steady state in 0.4M				ΔP=-0.05 M				ΔP=-0.05 M
				0 min				10 min
N=	279			N=	193			N=	182
Number of molecules (#)				Number of molecules (#)				Number of molecules (#)
time	mean	stdev		time	mean	stdev		time	mean	stdev
-6.975	168.068	92.0602		-6.882	199.404	195.417		-5.766	174.419	102.555
-6.882	174.636	94.1601		-6.789	209.794	196.038		-5.673	183.68	106.817
-6.789	185.233	96.4882		-6.696	216.217	195.667		-5.58	192.516	108.337
-6.696	194.71	99.6316		-6.603	223.818	195.034		-5.487	199.324	105.99
-6.603	196.003	98.4216		-6.51	223.192	186.873		-5.394	201.759	102.735
-6.51	199.587	98.3463		-6.417	231.411	184.965		-5.301	204.313	98.7422
-6.417	213.377	105.276		-6.324	243.978	187.635		-5.208	220.578	120.028
-6.324	217.863	105.542		-6.231	251.344	185.091		-5.115	226.419	121.871
-6.231	220.133	107.224		-6.138	253.866	182.126		-5.022	237.801	122.566
-6.138	225.255	107.542		-6.045	263.466	179.755		-4.929	247.571	124.692
-6.045	234.511	107.56		-5.952	269.343	175.358		-4.836	252.638	124.978
-5.952	246.94	117.755		-5.859	279.971	174.703		-4.743	265.576	125.351
-5.859	246.394	119.394		-5.766	287.901	174.719		-4.65	277.462	127.677
-5.766	249.452	120.525		-5.673	297.894	173.511		-4.557	292.775	130.252
-5.673	254.898	118.667		-5.58	302.658	169.012		-4.464	308.799	131.278
-5.58	261.546	117.545		-5.487	302.303	166.267		-4.371	316.443	135.125
-5.487	268.69	119.258		-5.394	318.172	190.69		-4.278	337.851	142.425
-5.394	272.221	121.923		-5.301	325.813	188.128		-4.185	352.594	143.989
-5.301	283.535	121.76		-5.208	335.294	186.345		-4.092	368.831	146.52
-5.208	295.842	120.933		-5.115	351.518	186.838		-3.999	387.961	148.107
-5.115	310.015	125.349		-5.022	369.665	187.308		-3.906	409.489	151.119
-5.022	323.441	126.499		-4.929	380.353	189.172		-3.813	426.455	153.44
-4.929	331.256	128.034		-4.836	392.241	188.154		-3.72	448.389	155.966
-4.836	345.033	128.454		-4.743	409.504	187.391		-3.627	467.973	157.833
-4.743	358.794	127.383		-4.65	425.552	186.935		-3.534	488.693	160.037
-4.65	369.997	128.714		-4.557	441.715	186.72		-3.441	508.822	161.887
-4.557	381.669	131.392		-4.464	453.43	187.801		-3.348	529.439	164.046
-4.464	397.918	134.754		-4.371	471.215	187.434		-3.255	550.31	164.983
-4.371	413.829	136.313		-4.278	489.011	187.856		-3.162	571.099	167.196
-4.278	429.798	137.042		-4.185	506.579	188.331		-3.069	591.95	168.554
-4.185	445.897	137.693		-4.092	530.406	197.013		-2.976	612.994	171.249
-4.092	464.07	146.974		-3.999	544.793	200.267		-2.883	641.82	178.747
-3.999	479.198	147.234		-3.906	562.967	202.403		-2.79	663.088	181.176
-3.906	495.827	147.58		-3.813	580.915	204.611		-2.697	683.522	183.627
-3.813	512.444	148.237		-3.72	598.732	207.021		-2.604	704.862	186.363
-3.72	529.161	149.113		-3.627	616.772	209.545		-2.511	726.665	189.908
-3.627	547.816	152.035		-3.534	635.108	212.405		-2.418	746.155	193.765
-3.534	564.316	152.905		-3.441	653.643	215.387		-2.325	767.922	196.008
-3.441	581.286	154.555		-3.348	672.232	218.685		-2.232	789.784	198.922
-3.348	598.325	156.343		-3.255	691.08	222.157		-2.139	811.886	202.071
-3.255	615.273	158.21		-3.162	710.129	225.067		-2.046	833.797	205.456
-3.162	636.834	174.226		-3.069	730.505	229.483		-1.953	855.262	212.523
-3.069	653.658	175.726		-2.976	750.435	231.029		-1.86	874.983	212.316
-2.976	670.837	177.421		-2.883	769.363	233.789		-1.767	893.91	213.096
-2.883	688.318	179.319		-2.79	788.451	236.876		-1.674	912.638	213.988
-2.79	705.79	181.332		-2.697	807.349	240.254		-1.581	930.631	214.989
-2.697	727.912	195.643		-2.604	828.228	244.366		-1.488	947.456	223.254
-2.604	744.808	196.481		-2.511	846.468	247.828		-1.395	962.931	225.167
-2.511	762.259	197.28		-2.418	864.262	251.339		-1.302	976.712	227.235
-2.418	779.897	198.867		-2.325	881.591	255.01		-1.209	989.707	229.377
-2.325	797.422	200.62		-2.232	898.62	258.451		-1.116	1001.7	231.245
-2.232	819.41	207.798		-2.139	911.208	260.814		-1.023	1013.9	231.938
-2.139	836.09	209.09		-2.046	925.961	262.424		-0.93	1023.73	232.201
-2.046	851.883	210.232		-1.953	940.229	264.045		-0.837	1032.94	232.507
-1.953	867.126	211.602		-1.86	953.975	265.601		-0.744	1041.35	233.376
-1.86	881.654	213.33		-1.767	967.053	267.405		-0.651	1049.23	234.582
-1.767	896.163	220.37		-1.674	981.563	270.463		-0.558	1054.35	237.419
-1.674	909.244	222.695		-1.581	992.2	271.625		-0.465	1061.06	238.703
-1.581	921.033	224.716		-1.488	1002.16	273.072		-0.372	1066.05	239.108
-1.488	932.154	226.753		-1.395	1011.36	274.844		-0.279	1070.68	239.07
-1.395	943.008	228.752		-1.302	1020.14	277.382		-0.186	1074.85	239.806
-1.302	948.434	235.569		-1.209	1027.89	280.483		-0.093	1077.22	241.315
-1.209	956.68	235.992		-1.116	1034.48	283.481		0	1077.51	241.931
-1.116	963.701	236.061		-1.023	1039.9	286.69		0.093	1076.93	242.639
-1.023	970.218	236.414		-0.93	1045.22	290.244		0.186	1075.53	243.361
-0.93	975.65	236.504		-0.837	1049.58	293.653		0.279	1071.42	242.849
-0.837	978.301	240.313		-0.744	1053.5	297.534		0.372	1068.61	243.288
-0.744	982.769	240.374		-0.651	1056.87	300.928		0.465	1065.03	243.279
-0.651	985.903	240.417		-0.558	1060.18	305.576		0.558	1061.71	242.742
-0.558	988.661	240.746		-0.465	1063.01	310.371		0.651	1058.11	242.497
-0.465	989.557	240.429		-0.372	1065.1	313.514		0.744	1051.27	239.421
-0.372	987.99	243.074		-0.279	1064.52	315.479		0.837	1048.44	237.876
-0.279	990.394	242.88		-0.186	1065.02	317.571		0.93	1045.02	237.107
-0.186	991.001	242.179		-0.093	1064.99	318.518		1.023	1040.59	235.655
-0.093	991.392	241.67		0	1065.23	319.395		1.116	1036.12	234.428
0	993.169	240.749		0.093	1064.57	320.501		1.209	1034.33	233.117
0.093	990.466	242.165		0.186	1040.1	341.581		1.302	1029.43	232.262
0.186	989.548	241.226		0.279	1038.93	342.404		1.395	1024.46	232.085
0.279	988.427	240.891		0.372	1035.94	341.955		1.488	1018.22	231.007
0.372	987.184	240.272		0.465	1034.32	343.007		1.581	1011.86	229.844
0.465	985.803	240.098		0.558	1032.42	343.645		1.674	1005.48	228.999
0.558	979.034	247.318		0.651	1028.43	341.322		1.767	998.822	228.904
0.651	975.957	246.758		0.744	1025.6	339.962		1.86	991.334	229.189
0.744	973.361	245.908		0.837	1022.16	339.375		1.953	984.685	227.937
0.837	971.14	245.784		0.93	1019.56	338.229		2.046	977.716	226.529
0.93	966.175	245.486		1.023	1016.03	338.221		2.139	967.559	224.764
1.023	959.354	249.72		1.116	998.381	348.954		2.232	960.286	223.228
1.116	956.973	249.59		1.209	995.807	347.397		2.325	952.564	221.49
1.209	953.789	249.572		1.302	993.144	345.836		2.418	945.358	219.697
1.302	950.404	249.608		1.395	988.111	343.65		2.511	938.184	217.611
1.395	946.974	249.321		1.488	984.811	342.485		2.604	930.932	216.519
1.488	933.234	260.384		1.581	978.267	341.358		2.697	924.751	215.597
1.581	929.208	259.198		1.674	974.11	340.572		2.79	916.477	215.59
1.674	924.785	258.014		1.767	969.911	337.443		2.883	907.739	214.426
1.767	919.846	256.862		1.86	964.671	336.113		2.976	899.301	213.201
1.86	916.804	255.596		1.953	953.052	330.372		3.069	889.728	212.591
1.953	906.556	257.315		2.046	943.305	331.88		3.162	877.496	215.845
2.046	900.743	255.801		2.139	937.545	330.265		3.255	867.767	216.188
2.139	894.859	254.19		2.232	931.132	327.999		3.348	858.095	215.216
2.232	889.458	253.804		2.325	925.019	327.477		3.441	848.381	214.256
2.325	883.072	252.939		2.418	918.989	325.251		3.534	836.619	213.091
2.418	867.435	260.259		2.511	914.941	324.008		3.627	828.857	210.058
2.511	860.172	256.954		2.604	908.784	321.87		3.72	817.664	207.816
2.604	853.38	253.754		2.697	902.42	319.852		3.813	807.32	206.182
2.697	847.413	250.728		2.79	896.66	317.947		3.906	796.285	203.968
2.79	842.349	247.493		2.883	884.973	307.936		3.999	786.916	201.775
2.883	833.352	246.488		2.976	879.104	307.683		4.092	775.638	200.464
2.976	826.633	243.293		3.069	873.297	306.685		4.185	765.03	199.219
3.069	819.656	239.838		3.162	867.367	305.764		4.278	754.863	196.666
3.162	811.238	235.862		3.255	861.183	304.943		4.371	744.477	194.835
3.255	804.373	232.58		3.348	850.201	294.463		4.464	733.936	192.366
3.348	793.607	232.69		3.441	844.094	292.709		4.557	721.8	188.532
3.441	786.866	230.297		3.534	836.348	289.867		4.65	712.218	185.666
3.534	779.72	228.667		3.627	828.745	287.232		4.743	702.39	182.843
3.627	773.004	226.591		3.72	821.067	285.475		4.836	693.775	179.949
3.72	768.11	223.872		3.813	814.963	282.571		4.929	684.208	176.995
3.813	762.151	222.408		3.906	806.654	279.394		5.022	672.494	172.615
3.906	755.11	221.299		3.999	797.929	277.363		5.115	663.239	170.233
3.999	748.145	219.813		4.092	789.076	274.746		5.208	655.177	168.436
4.092	741.29	218.878		4.185	782.052	273.405		5.301	645.975	166.655
4.185	729.273	212.744		4.278	769.752	267.436		5.394	636.843	165.102
4.278	724.077	211.493		4.371	756.255	259.889		5.487	627.89	164.269
4.371	716.633	209.866		4.464	748.057	256.53		5.58	618.544	163.067
4.464	709.35	209.303		4.557	739.99	253.157		5.673	609.562	162.403
4.557	702.286	208.339		4.65	732.019	250.015		5.766	600.406	162.214
4.65	691.846	202.56		4.743	723.971	247.094		5.859	591.583	161.799
4.743	684.004	199.715		4.836	714.547	245.128		5.952	583.008	159.331
4.836	676.856	198.595		4.929	706.51	242.592		6.045	574.16	159.739
4.929	671.013	197.832		5.022	698.177	240.061		6.138	564.016	158.864
5.022	664.288	197.537		5.115	690.426	238.198		6.231	554.496	157.557
5.115	657.996	196.975		5.208	682.11	235.747		6.324	547.344	154.196
5.208	651.563	196.131		5.301	674.985	232.657		6.417	534.169	150.066
5.301	644.619	195.197		5.394	666.614	231.342		6.51	524.943	148.631
5.394	638.814	195.74		5.487	658.702	230.663		6.603	517.804	147.923
5.487	632.186	194.778		5.58	649.943	229.419		6.696	508.136	146.002
5.58	625.363	193.928		5.673	642.997	227.547		6.789	498.553	144.278
5.673	618.766	193.547		5.766	636.898	226.05		6.882	491.187	142.758
5.766	611.772	192.558		5.859	629.055	224.475		6.975	482.257	141.326
5.859	604.917	191.76		5.952	620.497	222.214		7.068	473.327	141.278
5.952	599.109	191.668		6.045	612.035	219.559		7.161	465.559	140.713
6.045	592.93	190.342		6.138	599.001	211.944		7.254	456.434	140.425
6.138	587.659	188.203		6.231	590.133	209.679		7.347	449.252	140.86
6.231	579.942	186.243		6.324	581.598	208.538		7.44	440.84	140.804
6.324	571.688	184.834		6.417	573.264	207.518		7.533	432.655	140.739
6.417	563.717	183.235		6.51	564.633	205.909		7.626	421.684	138.19
6.51	557.415	180.89		6.603	555.924	204.415		7.719	415.177	138.394
6.603	549.403	180.09		6.696	547.676	203.886		7.812	407.198	139.425
6.696	541.223	179.369		6.789	539.543	203.035		7.905	401.041	138.957
6.789	534.024	179.226		6.882	532.526	201.843		7.998	391.729	138.851
6.882	526.159	178.855		6.975	524.575	200.278		8.091	385.94	138.819
6.975	519.75	178.148		7.068	516.728	199.659		8.184	379.378	138.582
7.068	508.132	170.408		7.161	510.986	196.261		8.277	370.311	137.852
7.161	500.373	169.679		7.254	505.902	193.859		8.37	363.227	136.999
7.254	493.387	168.983		7.347	498.136	191.253		8.463	355.398	135.599
7.347	486.58	168.275		7.44	490.665	188.261		8.556	351.088	134.263
7.44	480.635	166.7		7.533	485.082	184.978		8.649	343.179	133.046
7.533	474.38	165.913		7.626	478.99	182.045		8.742	344.576	127.274
7.626	466.703	164.492		7.719	471.54	179.611		8.835	337.015	126.457
7.719	459.994	163.515		7.812	465.304	177.773		8.928	330.976	126.629
7.812	452.959	162.722		7.905	457.546	175.728		9.021	327.716	124.446
7.905	446.194	161.572		7.998	452.486	173.576		9.114	320.637	123.814
7.998	433.57	149.92		8.091	442.024	173.511		9.207	314.6	121.255
8.091	427.452	148.636		8.184	434.139	172.355		9.3	308.18	121.106
8.184	420.411	147.511		8.277	426.212	171.413		9.393	303.926	121.328
8.277	413.558	146.486		8.37	418.025	170.384		9.486	299.781	120.962
8.37	407.377	144.669		8.463	412.156	168.165		9.579	296.847	118.946
8.463	400.881	143.451		8.556	409.105	166.223		9.672	305.148	113.979
8.556	393.04	142.421		8.649	400.541	165.643		9.765	298.31	113.087
8.649	385.396	142.663		8.742	397.84	164.397		9.858	292.736	111.75
8.742	377.43	142.038		8.835	392.98	161.604		9.951	287.439	110.157
8.835	371.208	140.077		8.928	385.061	159.26		10.044	279.752	109.135
8.928	360.983	138.149		9.021	378.125	151.745		10.137	275.728	108.951
9.021	353.806	138.656		9.114	374.218	150.718		10.23	268.917	110.658
9.114	347.144	139.548		9.207	366.277	149.751		10.323	265.832	109.356
9.207	342.057	139.991		9.3	359.716	148.348		10.416	262.552	110.274
9.3	335.488	140.65		9.393	358.04	144.748		10.509	258.541	110.572
9.393	337.253	139.01		9.486	354.923	143.115		10.602	254.101	109.197
9.486	332.97	140.811		9.579	351.263	141.688		10.695	245.565	109.668
9.579	330.278	141.579		9.672	349.636	140.77		10.788	244.007	110.21
9.672	326.158	142.563		9.765	346.167	139.168		10.881	235.655	110.554
9.765	322.2	142.4		9.858	339.458	137.795		10.974	234.868	111.289
9.858	321.36	141.449		9.951	331.862	131.535		11.067	240.6	116.595
9.951	315.156	142.154		10.044	327.808	128.752		11.16	232.156	115.155
10.044	313.096	143.144		10.137	323.589	126.661		11.253	233.723	114.869
10.137	312.14	143.387		10.23	317.953	126.475		11.346	233.676	113.467
10.23	309.326	144.479		10.323	313.488	125.516		11.439	229.528	112.302
10.323	309.091	145.031		10.416	313.678	125.1		11.532	236.428	109.319
10.416	305.502	146.318		10.509	310.632	122.919		11.625	229.852	107.379
10.509	303.552	147.633		10.602	308.409	120.258		11.718	227.849	105.275
10.602	299.091	149.114		10.695	301.428	119.197		11.811	221.523	102.858
10.695	287.552	123.485		10.788	295.89	118.474		11.904	220.642	99.2752
10.788	283.818	124.766		10.881	298.245	114.151		11.997	213.782	99.2191
10.881	279.527	125.222		10.974	300.593	111.313		12.09	210.964	98.2071
10.974	276.514	124.521		11.067	299.648	110.022		12.183	210.676	98.8228
11.067	274.394	124.28		11.16	293.031	110.614		12.276	204.713	96.4731
11.16	275.67	121.215		11.253	287.647	110.296		12.369	198.749	94.3814
11.253	279.718	120.144		11.346	291.669	105.767		12.462	194.96	96.9149
11.346	275.751	118.119		11.439	287.617	105.265		12.555	191.549	97.823
11.439	274.084	115.565		11.532	280.921	105.336
11.532	267.514	115.392		11.625	274.378	105.517
11.625	264.59	114.622		11.718	267.902	106.198
11.718	279.075	110.605		11.811	272.621	106.14
11.811	271.865	110.138		11.904	266.125	106.869
11.904	268.894	109.601		11.997	263.717	105.886
11.997	262.781	108.985		12.09	257.652	106.589
12.09	267.296	99.6777		12.183	257.623	106.47
12.183	264.733	100.988		12.276	254.154	109.411
12.276	262.651	100.76		12.369	247.634	110.612
12.369	263.515	96.9095		12.462	245.091	111.268
12.462	260.557	95.8171		12.555	241.778	113.012
12.555	254.685	95.9054		12.648	237.477	114.941
12.648	251.329	98.0329		12.741	240.808	118.81
12.741	245.766	97.7083		12.834	239.132	119.896
12.834	240.358	97.4721		12.927	243.407	119.272
12.927	234.95	97.3793		13.02	240.814	121.655
13.02	229.449	97.4793		13.113	235.845	122.609
13.113	230.227	97.5367		13.206	229.393	125.061
13.206	226.648	97.4121		13.299	224.611	125.799
13.299	221.116	97.2895		13.392	223.27	126.023
13.392	219.252	95.7639		13.485	223.073	125.628
13.485	219.972	94.3527		13.578	224.982	122.914
13.578	222.975	95.5414		13.671	228.983	124.542
13.671	222.294	93.6812		13.764	223.01	123.532
13.764	216.467	93.4765		13.857	217.492	122.414
13.857	210.639	93.3938		13.95	211.973	121.41
13.95	208.972	92.409		14.043	206.454	120.521
14.043	207.722	95.8451		14.136	216.2	139.521
14.136	206.833	95.2084		14.229	218.745	141.296
14.229	205.725	94.2417		14.322	225.253	142.516
14.322	203.923	94.1848		14.415	219.281	142.848
14.415	198.276	93.6879
14.508	186.317	91.238

## Sheet: ΔP=-0.1 M
WT				WT				WT
Protoplats				Protoplats				Protoplats
Steady state in 0.4M				ΔP=-0.1 M				ΔP=-0.1 M
				0 min				10 min
N=	413			N=	190			N=	186
Number of molecules (#)				Number of molecules (#)				Number of molecules (#)
time	mean	stdev		time	mean	stdev		time	mean	stdev
-6.975	172.705	123.512		-8.649	160.227	88.5596		-5.58	166.894	104.976
-6.882	209.186	170.076		-8.556	166.64	85.3332		-5.487	173.78	108.286
-6.789	218.627	167.17		-8.463	173.682	84.0826		-5.394	187.279	108.448
-6.696	225.858	163.77		-8.37	182.649	83.9113		-5.301	194.879	108.135
-6.603	212.191	148.996		-8.277	182.161	77.7201		-5.208	204.739	105.747
-6.51	222.773	146.673		-8.184	186.309	79.0681		-5.115	214.935	105.166
-6.417	234.544	146.46		-8.091	196.225	78.6643		-5.022	230.013	108.876
-6.324	237.682	143.56		-7.998	205.396	77.611		-4.929	234.806	112.305
-6.231	241.14	141.502		-7.905	216.415	78.0079		-4.836	237.262	113.447
-6.138	234.2	136.681		-7.812	224.25	78.4237		-4.743	243.327	112.251
-6.045	237.622	135.081		-7.719	249.521	115.301		-4.65	244.579	113.094
-5.952	252.482	139.721		-7.626	267.866	127.891		-4.557	259.509	119.634
-5.859	258.586	138.131		-7.533	275.179	130.473		-4.464	270.671	121.329
-5.766	262.932	138.33		-7.44	281.324	131.988		-4.371	279.855	121.972
-5.673	268.851	137.29		-7.347	279.747	133.565		-4.278	293.358	123.123
-5.58	275.009	137.061		-7.254	286.335	133.811		-4.185	305.403	121.888
-5.487	281.905	139.144		-7.161	297.198	134.843		-4.092	318.181	123.144
-5.394	288.202	139.203		-7.068	302.979	135.055		-3.999	332.944	123.9
-5.301	293.662	140.408		-6.975	311.012	136.856		-3.906	350.046	123.665
-5.208	301.921	140.48		-6.882	315.67	138.601		-3.813	369.277	124.171
-5.115	312.17	140.402		-6.789	321.639	143.219		-3.72	386.111	128.383
-5.022	322.038	142.9		-6.696	331.399	143.539		-3.627	405.303	130.236
-4.929	327.171	144.672		-6.603	337.588	146.239		-3.534	424.586	132.826
-4.836	336.447	144.975		-6.51	343.936	148.886		-3.441	445.585	135.204
-4.743	348.515	143.303		-6.417	337.384	155.733		-3.348	467.566	137.866
-4.65	360.43	143.156		-6.324	349.752	156.002		-3.255	489.743	140.197
-4.557	372.003	145.987		-6.231	360.777	156.178		-3.162	511.767	143.624
-4.464	386.411	146.794		-6.138	367.994	157.079		-3.069	531.998	147.173
-4.371	400.551	147.743		-6.045	365.429	162.608		-2.976	553.582	150.691
-4.278	416.613	147.861		-5.952	373.117	161.956		-2.883	575.761	154.53
-4.185	432.377	147.805		-5.859	386.142	161.965		-2.79	596.935	158.277
-4.092	447.75	151.276		-5.766	391.021	165.437		-2.697	617.378	162.895
-3.999	464.423	152.164		-5.673	406.323	165.983		-2.604	638.446	165.17
-3.906	481.724	153.472		-5.58	411.626	168.299		-2.511	658.82	167.135
-3.813	498.949	154.667		-5.487	418.449	170.558		-2.418	679.868	169.815
-3.72	516.479	156.611		-5.394	430.848	169.574		-2.325	700.343	172.094
-3.627	532.767	161.7		-5.301	449.964	178.429		-2.232	720.15	175.077
-3.534	550.317	163.179		-5.208	454.279	183.786		-2.139	741.275	178.143
-3.441	567.763	164.838		-5.115	463.302	186.828		-2.046	761.351	181.202
-3.348	585.411	167.004		-5.022	472.702	188.474		-1.953	781.124	183.494
-3.255	603.86	169.304		-4.929	487.644	187.52		-1.86	800.659	186.13
-3.162	622.312	172.545		-4.836	496.294	193.872		-1.767	815.529	191.418
-3.069	640.52	175.355		-4.743	510.63	191.95		-1.674	833.158	193.903
-2.976	658.922	178.418		-4.65	523.803	189.788		-1.581	850.432	196.292
-2.883	677.326	181.185		-4.557	535.649	186.523		-1.488	866.713	198.417
-2.79	695.817	184.291		-4.464	549.77	184.577		-1.395	882.613	201.092
-2.697	718.101	201.248		-4.371	556.819	188.145		-1.302	896.919	203.479
-2.604	736.237	204.058		-4.278	568.976	187.925		-1.209	910.457	206.311
-2.511	754.468	206.758		-4.185	583.603	186.011		-1.116	923.203	209.217
-2.418	772.667	209.827		-4.092	598.055	184.18		-1.023	935.108	212.396
-2.325	790.406	213.197		-3.999	612.65	182.627		-0.93	946.337	215.987
-2.232	813.169	225.419		-3.906	622.661	187.088		-0.837	947.435	228.132
-2.139	829.808	227.62		-3.813	638.129	186.1		-0.744	952.908	228.665
-2.046	845.782	230.047		-3.72	652.28	185.647		-0.651	957.802	229.763
-1.953	861.188	232.798		-3.627	667.814	185.279		-0.558	961.977	230.777
-1.86	875.748	236.058		-3.534	682.919	185.231		-0.465	965.576	231.854
-1.767	888.445	242.526		-3.441	697.999	185.032		-0.372	966.065	233.196
-1.674	901.192	245.757		-3.348	713.116	185.302		-0.279	967.935	233.841
-1.581	913.747	248.805		-3.255	728.308	185.603		-0.186	969.496	233.781
-1.488	925.611	251.886		-3.162	743.312	186.016		-0.093	969.459	234.03
-1.395	936.499	255.683		-3.069	758.271	186.662		0	970.231	234.312
-1.302	945.567	257.996		-2.976	771.973	188.388		0.093	964.532	240.086
-1.209	954.903	260.522		-2.883	787.468	189.724		0.186	962.256	239.945
-1.116	962.725	263.151		-2.79	803.453	191.292		0.279	959.381	238.78
-1.023	969.937	265.852		-2.697	818.209	193.375		0.372	955.995	237.78
-0.93	976.335	268.347		-2.604	832.271	196.337		0.465	952.616	237.036
-0.837	975.447	277.127		-2.511	843.599	204.838		0.558	949.349	236.563
-0.744	979.774	279.717		-2.418	858.562	208.125		0.651	946.131	236.352
-0.651	983.921	282.496		-2.325	871.771	211.556		0.744	942.712	236.249
-0.558	987.639	284.652		-2.232	885.661	215.214		0.837	939.201	236.203
-0.465	990.887	287.363		-2.139	898.772	219.316		0.93	935.173	236.209
-0.372	992.683	290.791		-2.046	910.961	222.642		1.023	928.711	235.658
-0.279	994.338	291.586		-1.953	922.971	227.036		1.116	922.301	234.599
-0.186	995.333	292.473		-1.86	933.496	230.567		1.209	915.885	233.827
-0.093	995.811	293.173		-1.767	944.692	233.735		1.302	909.47	233.389
0	996.877	294.454		-1.674	957.829	235.742		1.395	905.445	232.77
0.093	984.494	305.865		-1.581	966.628	239.879		1.488	897.186	231.813
0.186	983.3	305.704		-1.488	977.352	243.884		1.581	888.505	230.974
0.279	982.145	306.368		-1.395	986.57	248.081		1.674	879.766	230.145
0.372	980.551	306.481		-1.302	995.654	251.085		1.767	870.666	229.344
0.465	978.658	306.946		-1.209	1004.23	254.084		1.86	864.148	228.57
0.558	974.543	307.311		-1.116	1013.07	255.12		1.953	854.81	227.623
0.651	971.291	307.016		-1.023	1019.27	256.714		2.046	845.788	225.674
0.744	968.85	306.909		-0.93	1026.4	257.997		2.139	836.259	224.07
0.837	966.437	306.621		-0.837	1032.45	258.449		2.232	827.066	223.046
0.93	964.701	305.559		-0.744	1047.99	249.815		2.325	817.153	221.716
1.023	956.913	307.322		-0.651	1037.59	271.207		2.418	806.203	220.988
1.116	951.945	305.874		-0.558	1041.75	272.781		2.511	797.027	219.786
1.209	947.254	304.901		-0.465	1045.23	274.391		2.604	787.562	218.761
1.302	942.535	304.509		-0.372	1046.73	275.991		2.697	778.882	219.239
1.395	938.39	304.257		-0.279	1049.2	278.034		2.79	766.109	216.943
1.488	931.286	303.149		-0.186	1051.1	280.67		2.883	758.705	214.77
1.581	925.199	301.803		-0.093	1052.3	284.279		2.976	748.552	212.285
1.674	918.744	299.463		0	1052.48	287.296		3.069	738.162	209.22
1.767	912.897	297.927		0.093	1052.31	290.254		3.162	728.893	206.238
1.86	909.299	296.328		0.186	1051.45	291.017		3.255	717.513	202.961
1.953	896.592	300.476		0.279	1029.42	312.36		3.348	706.198	199.769
2.046	888.869	299.394		0.372	1028.59	313.98		3.441	695.727	196.141
2.139	882.132	298.033		0.465	1027.41	315.668		3.534	685.184	193.178
2.232	875.256	296.221		0.558	1025.26	317.207		3.627	674.391	189.987
2.325	870.136	294.582		0.651	1021.33	315.937		3.72	668.402	185.257
2.418	862.672	294.605		0.744	1017.3	314.339		3.813	660.401	184.015
2.511	855.795	292.586		0.837	1013.39	312.72		3.906	649.967	181.13
2.604	848.65	290.978		0.93	1009.66	311.385		3.999	639.766	178.862
2.697	841.434	289.186		1.023	1005.72	310.214		4.092	629.387	177.48
2.79	832.383	284.008		1.116	998.069	309.608		4.185	619.222	176.226
2.883	823.913	282.02		1.209	978.301	326.113		4.278	609.98	174.656
2.976	815.768	279.809		1.302	973.448	324.344		4.371	599.827	173.242
3.069	807.713	278.3		1.395	968.362	323.779		4.464	589.259	171.857
3.162	799.161	277.413		1.488	962.213	321.307		4.557	578.921	170.589
3.255	793.75	277.169		1.581	959.631	318.999		4.65	570.15	169.038
3.348	784.397	275.789		1.674	954.769	318.225		4.743	559.421	166.941
3.441	775.311	274.391		1.767	945.892	321.622		4.836	548.231	166.021
3.534	765.935	273.368		1.86	938.74	319.209		4.929	538.139	164.393
3.627	757.403	271.923		1.953	931.696	317.648		5.022	526.464	163.235
3.72	750.089	270.951		2.046	926.867	314.506		5.115	510.002	149.372
3.813	741.566	270.141		2.139	918.84	312.152		5.208	500.931	147.413
3.906	732.709	269.133		2.232	910.981	310.164		5.301	490.755	146.578
3.999	724.515	267.94		2.325	903.169	308.424		5.394	481.562	145.49
4.092	715.735	266.865		2.418	895.174	307.033		5.487	471.659	144.089
4.185	707.917	265.575		2.511	889.782	304.66		5.58	460.889	143.191
4.278	699.664	264.497		2.604	881.345	302.9		5.673	455.571	142.603
4.371	691.948	262.787		2.697	872.606	300.367		5.766	445.942	139.686
4.464	684.496	261.815		2.79	864.037	298.082		5.859	435.693	136.524
4.557	677.2	260.391		2.883	855.5	295.956		5.952	425.702	134.048
4.65	673.973	258.368		2.976	844.73	293.209		6.045	415.086	131.575
4.743	665.07	256.485		3.069	836.064	291.735		6.138	407.461	126.939
4.836	656.986	255.343		3.162	827.313	290.626		6.231	396.642	124.504
4.929	649.188	254.887		3.255	818.118	289.758		6.324	385.087	122.58
5.022	641.073	253.744		3.348	810.214	289.286		6.417	374.964	120.654
5.115	634.473	252.573		3.441	802.736	288.962		6.51	364.08	118.557
5.208	624.66	250.374		3.534	792.149	287.499		6.603	353.83	117.728
5.301	615.62	247.757		3.627	781.936	285.161		6.696	343.515	117.088
5.394	605.773	245.583		3.72	772.682	284.594		6.789	335.037	116.115
5.487	596.705	243.042		3.813	762.852	281.716		6.882	325.601	114.525
5.58	582.218	226.753		3.906	757.825	277.593		6.975	315.62	112.799
5.673	572.967	224.7		3.999	746.781	275.845		7.068	308.775	109.524
5.766	563.608	222.985		4.092	735.679	274.492		7.161	300.083	107.891
5.859	554.857	221.353		4.185	725.572	274.101		7.254	292.337	106.222
5.952	545.896	219.28		4.278	716.267	273.407		7.347	282.812	104.648
6.045	539.527	215.829		4.371	710.404	271.156		7.44	276.303	103.284
6.138	531.346	214.805		4.464	697.313	268.915		7.533	266.445	102.11
6.231	522.409	212.866		4.557	686.181	267.183		7.626	259.724	100.372
6.324	513.804	211.646		4.65	675.127	265.684		7.719	252.382	98.6262
6.417	506.75	210.263		4.743	664.338	264.098		7.812	249.949	93.8927
6.51	501.139	207.344		4.836	655.431	262.636		7.905	246.146	89.3837
6.603	493.459	205.663		4.929	644.337	261.695		7.998	243.761	87.0638
6.696	484.774	203.667		5.022	632.83	260.83		8.091	239.344	88.327
6.789	476.016	201.526		5.115	622.749	260.338		8.184	241.428	87.2978
6.882	468.408	199.735		5.208	613.005	259.941		8.277	238.668	85.3841
6.975	462.774	196.619		5.301	605.986	258.894		8.37	233.973	84.0937
7.068	455.581	196.251		5.394	594.172	258.984		8.463	236.917	79.4238
7.161	446.901	196.241		5.487	585.862	258.883		8.556	229.304	77.292
7.254	438.843	195.151		5.58	574.461	258.334		8.649	219.467	74.9838
7.347	430.896	194.132		5.673	564.641	258.159		8.742	211.849	72.6676
7.44	430.233	189.906		5.766	562.693	257.181		8.835	205.452	68.7726
7.533	424.614	189.478		5.859	552.186	256.873		8.928	195.854	68.1778
7.626	417.468	189.095		5.952	540.753	255.974		9.021	185.954	66.1505
7.719	409.076	188.454		6.045	534.856	253.868		9.114	178.138	64.306
7.812	403.389	188.367		6.138	522.595	252.53		9.207	173.48	63.5332
7.905	397.224	187.202		6.231	513.053	250.253		9.3	163.339	62.2815
7.998	387.541	182.846		6.324	497.787	234.562		9.393	174.642	63.8492
8.091	380.31	181.542		6.417	485.635	230.856
8.184	374.421	180.184		6.51	473.066	229.4
8.277	368.273	177.791		6.603	464.06	228.243
8.37	363.811	175.712		6.696	468.985	220.212
8.463	357.224	172.863		6.789	458.959	219.116
8.556	350.786	171.368		6.882	449.522	217.014
8.649	343.333	170.036		6.975	437.523	216.01
8.742	338.296	167.944		7.068	429.347	214.624
8.835	336.028	165.56		7.161	418.438	213.919
8.928	338.399	164.336		7.254	413.475	214.749
9.021	331.523	164.348		7.347	407.175	213.824
9.114	327.995	163.818		7.44	396.878	213.882
9.207	324.709	163.991		7.533	394.392	213.573
9.3	320.083	163.317		7.626	396.705	208.886
9.393	320.005	163.944		7.719	398.38	205.335
9.486	316.403	164.161		7.812	391.263	204.257
9.579	312.292	163.664		7.905	389.953	204.896
9.672	310.632	162.172		7.998	395.436	200.866
9.765	305.236	161.687		8.091	398.39	199.831
9.858	296.904	150.364		8.184	389.848	198.682
9.951	291.248	150.576		8.277	391.362	196.01
10.044	287.747	151.731		8.37	388.218	195.524
10.137	282.467	150.881		8.463	395.461	190.789
10.23	284.77	148.562		8.556	404.857	184.022
10.323	284.123	150.516		8.649	395.585	183.014
10.416	278.816	149.754		8.742	386.407	181.968
10.509	279.595	149.853		8.835	377.127	181.119
10.602	275.251	149.568		8.928	367.996	180.015
10.695	270.88	150.568		9.021	367.49	176.953
10.788	249.564	94.2299		9.114	361.487	171.605
10.881	246.694	92.8843		9.207	352.482	169.407
10.974	243.836	92.4935		9.3	343.552	167.284
11.067	238.859	92.7829		9.393	338.903	164.871
11.16	233.299	92.9631		9.486	330.138	163.25
11.253	235.52	93.3565		9.579	325.551	160.758
11.346	230.964	93.8551		9.672	316.544	158.907
11.439	229.301	93.552		9.765	314.8	156.7
11.532	227.386	93.2246		9.858	313.881	153.69
11.625	221.28	93.4437		9.951	315.536	147.601
11.718	212.377	77.1938		10.044	298.497	125.356
11.811	206.647	77.6844		10.137	290.293	125.172
11.904	205.54	77.2712		10.23	282.098	125.139
11.997	201.83	76.4504		10.323	273.635	124.742
12.09	197.148	76.9937		10.416	269.722	123.678
12.183	202.054	76.1138		10.509	269.367	122.908
12.276	202.732	75.8773		10.602	260.258	122.129
12.369	197.488	75.4069		10.695	256.544	119.731
12.462	192.153	75.045		10.788	252.566	117.399
12.555	194.929	72.0857		10.881	243.619	116.016
12.648	190.333	74.0646		10.974	236.764	116.226
12.741	183.398	75.0195		11.067	229.76	117.161
12.834	179.373	76.1816		11.16	225.519	116.647
12.927	176.081	77.1049		11.253	216.999	116.295
13.02	170.533	78.0969		11.346	208.48	116.082
13.113	159.604	78.8797		11.439	260.472	120.889
13.206	162.996	86.365		11.532	275.76	130.378
				11.625	294.138	119.506

## Sheet: ΔP=-0.2 M
WT				WT				WT
Protoplats				Protoplats				Protoplats
Steady state in 0.4M				ΔP=-0.2 M				ΔP=-0.2 M
				0 min				10 min
N=	269			N=	396			N=	309
Number of molecules (#)				Number of molecules (#)				Number of molecules (#)
time	mean	stdev		time	mean	stdev		time	mean	stdev
-6.045	184.276	123.526		-9.765	288.053	241.242		-5.58	327.555	269.073
-5.952	196.901	127.294		-9.672	288.467	238.01		-5.487	291.674	251.38
-5.859	200.808	123.568		-9.579	289.029	235.327		-5.394	286.342	236.282
-5.766	203.613	122.713		-9.486	293.637	233.76		-5.301	279.276	226.834
-5.673	209.869	119.173		-9.393	266.155	216.183		-5.208	265.981	206.037
-5.58	221.758	122.571		-9.3	271.753	211.791		-5.115	274.823	200.669
-5.487	232.338	123.997		-9.207	281.33	211.663		-5.022	289.193	202.203
-5.394	237.431	125.102		-9.114	288.199	210.45		-4.929	290.471	197.709
-5.301	242.46	125.085		-9.021	297.146	210.335		-4.836	286.118	191.699
-5.208	242.095	121.309		-8.928	303.556	209.121		-4.743	285.964	179.006
-5.115	248.391	118.72		-8.835	312.157	209.353		-4.65	294.979	174.607
-5.022	258.707	118.639		-8.742	318.347	208.476		-4.557	298.823	173.38
-4.929	265.132	120.2		-8.649	326.103	207.211		-4.464	305.056	170.084
-4.836	278.394	120.552		-8.556	333.961	206.648		-4.371	310.602	163.766
-4.743	291.158	124.243		-8.463	339.534	205.367		-4.278	317.556	159.337
-4.65	302.835	124.492		-8.37	347.715	204.456		-4.185	331.978	155.949
-4.557	315.303	125.567		-8.277	354.838	204.442		-4.092	345.827	154.971
-4.464	326.899	127.231		-8.184	357.957	205.3		-3.999	360.743	153.308
-4.371	340.922	127.288		-8.091	363.444	206.509		-3.906	374.307	150.946
-4.278	355.016	127.462		-7.998	368.697	206.008		-3.813	391.063	147.998
-4.185	368.894	128.622		-7.905	380.581	205.695		-3.72	409.577	146.464
-4.092	375.005	132.459		-7.812	387.621	206.731		-3.627	423.397	147.836
-3.999	391.411	132.357		-7.719	392.907	207.763		-3.534	441.474	147.121
-3.906	405.799	131.927		-7.626	402.469	208.676		-3.441	461.15	145.818
-3.813	422.252	132.184		-7.533	407.761	208.769		-3.348	479.612	145.266
-3.72	438.911	132.597		-7.44	417.813	209.281		-3.255	501.604	149.073
-3.627	450.555	136.24		-7.347	421.35	211.308		-3.162	526.101	171.071
-3.534	466.403	136.107		-7.254	431.774	211.862		-3.069	545.881	170.822
-3.441	483.141	136.917		-7.161	445.743	213.205		-2.976	565.854	170.857
-3.348	500.003	137.7		-7.068	456.181	213.712		-2.883	587.834	170.849
-3.255	517.869	139.394		-6.975	471.813	216.757		-2.79	608.95	171.531
-3.162	535.793	143.002		-6.882	474.522	222.054		-2.697	629.642	175.363
-3.069	552.535	145.309		-6.789	487.89	221.721		-2.604	650.643	176.323
-2.976	571.078	146.215		-6.696	500.857	221.072		-2.511	672.248	178.05
-2.883	589.785	148.499		-6.603	513.265	220.908		-2.418	693.109	179.027
-2.79	608.462	150.342		-6.51	524.867	221.605		-2.325	715.745	183.36
-2.697	625.023	153.597		-6.417	526.044	228.378		-2.232	741.707	194.603
-2.604	644.136	155.859		-6.324	538.71	229.371		-2.139	761.929	197.1
-2.511	663.084	157.593		-6.231	551.515	230.048		-2.046	781.662	200.349
-2.418	682.062	159.294		-6.138	565.052	230.35		-1.953	800.662	203.187
-2.325	700.484	161.816		-6.045	578.659	230.638		-1.86	818.438	206.157
-2.232	725.121	177.343		-5.952	585.213	237.984		-1.767	844.275	224.139
-2.139	743.443	179.68		-5.859	598.232	238.669		-1.674	860.443	225.421
-2.046	761.446	182.015		-5.766	612.839	238.929		-1.581	875.748	226.711
-1.953	779.525	184.119		-5.673	626.481	239.314		-1.488	890.478	227.345
-1.86	796.975	186.987		-5.58	640.416	238.698		-1.395	903.644	229.112
-1.767	815.02	190.136		-5.487	637.505	250.208		-1.302	913.585	231.3
-1.674	831.493	193.049		-5.394	649.595	251.128		-1.209	925.515	233.257
-1.581	848.162	196.05		-5.301	662.289	250.924		-1.116	937.326	234.98
-1.488	864.773	199.551		-5.208	676.278	251.081		-1.023	947.599	236.757
-1.395	880.171	202.827		-5.115	690.252	251.07		-0.93	956.809	238.388
-1.302	891.289	206.199		-5.022	682.657	273.866		-0.837	962.766	241.955
-1.209	904.272	207.801		-4.929	697.023	273.639		-0.744	970.319	244.327
-1.116	916.866	209.308		-4.836	711.468	273.615		-0.651	977.084	246.947
-1.023	927.964	210.922		-4.743	725.918	273.748		-0.558	982.242	248.943
-0.93	938.38	212.754		-4.65	739.514	273.124		-0.465	987.315	250.954
-0.837	947.65	214.745		-4.557	747.455	291.709		-0.372	985.304	265.134
-0.744	957.279	217.087		-4.464	760.973	291.206		-0.279	988.342	265.868
-0.651	965.449	218.915		-4.371	774.335	290.563		-0.186	991.081	266.613
-0.558	972.694	220.56		-4.278	788.608	289.367		-0.093	992.4	266.614
-0.465	978.901	222.377		-4.185	802.901	288.515		0	993.356	267.573
-0.372	980.397	229.043		-4.092	811.183	291.451		0.093	990.91	269.398
-0.279	983.895	229.9		-3.999	824.213	291.313		0.186	990.165	268.634
-0.186	986.413	230.885		-3.906	836.762	292.041		0.279	988.784	268.164
-0.093	988.372	231.259		-3.813	849.671	292.119		0.372	988.251	266.277
0	989.809	231.995		-3.72	862.025	292.535		0.465	987.184	264.714
0.093	988.384	234.982		-3.627	866.133	308.261		0.558	972.869	272.77
0.186	988.688	235.908		-3.534	878.335	308.588		0.651	970.347	271.024
0.279	988.937	236.518		-3.441	889.946	309.45		0.744	966.751	269.766
0.372	988.851	237.359		-3.348	901.801	310.274		0.837	963.279	268.61
0.465	985.949	236.323		-3.255	915.154	310.776		0.93	959.809	267.507
0.558	981.409	239.913		-3.162	929.296	316.07		1.023	955.702	265.778
0.651	979.168	239.186		-3.069	940.379	317.227		1.116	951.8	264.182
0.744	976.869	238.646		-2.976	952.234	318.186		1.209	948.07	262.694
0.837	974.019	237.326		-2.883	963.702	318.954		1.302	943.252	260.999
0.93	971.418	236.959		-2.79	977.588	320.014		1.395	938.051	258.548
1.023	967.052	237.854		-2.697	978.332	331.847		1.488	925.607	266.036
1.116	964.538	237.249		-2.604	990.105	333.743		1.581	920.622	265.169
1.209	961.231	236.184		-2.511	1002.41	334.997		1.674	914.423	264.813
1.302	957.979	235.748		-2.418	1013.96	336.73		1.767	909.46	263.125
1.395	957.365	235.667		-2.325	1025.71	338.462		1.86	905.199	262.694
1.488	951.956	240.677		-2.232	1040.67	343.223		1.953	899.846	262.224
1.581	947.249	240.172		-2.139	1052.95	346.525		2.046	892.962	260.454
1.674	941.431	238.756		-2.046	1064.45	348.399		2.139	886.511	258.94
1.767	935.318	237.974		-1.953	1075.24	350.48		2.232	879.221	257.491
1.86	930.955	235.485		-1.86	1087.19	353.078		2.325	874.593	255.628
1.953	921.556	238.299		-1.767	1081.63	368.68		2.418	867.698	255.668
2.046	916.592	238.123		-1.674	1090.44	371.486		2.511	861.205	256.088
2.139	910.156	236.94		-1.581	1098.97	374.378		2.604	853.194	254.562
2.232	903.547	235.568		-1.488	1106.9	376.115		2.697	846.337	254.324
2.325	895.957	234.063		-1.395	1114.02	379.476		2.79	834.408	247.609
2.418	891.158	231.496		-1.302	1121.88	384.001		2.883	826.265	245.704
2.511	883.365	229.513		-1.209	1127.8	386.542		2.976	818.791	244.904
2.604	876.324	227.9		-1.116	1133.98	388.788		3.069	811.011	243.399
2.697	869.444	226.207		-1.023	1139.99	391.18		3.162	802.904	242.688
2.79	865.956	223.35		-0.93	1151.74	389.75		3.255	798.332	237.951
2.883	858.643	222.036		-0.837	1146.81	401.817		3.348	789.942	237.038
2.976	851.041	221.398		-0.744	1151.59	403.007		3.441	781.799	235.777
3.069	842.272	220.138		-0.651	1156.44	403.823		3.534	772.843	235.253
3.162	833.665	219.638		-0.558	1160.47	404.916		3.627	765.642	235.317
3.255	825.757	218.306		-0.465	1164.15	405.613		3.72	757.631	234.608
3.348	814.724	221.866		-0.372	1167.68	407.499		3.813	749.56	234.536
3.441	805.538	219.269		-0.279	1170.14	408.507		3.906	740.468	233.571
3.534	795.297	216.01		-0.186	1171.58	409.782		3.999	731.438	233.238
3.627	785.882	213.167		-0.093	1173.92	410.669		4.092	723.757	233.059
3.72	775.929	209.001		0	1183.06	406.034		4.185	717.314	231.88
3.813	764.942	207.528		0.093	1172.3	414.964		4.278	707.611	231.364
3.906	755.646	205.557		0.186	1172.38	414.841		4.371	698.826	230.755
3.999	745.731	203.553		0.279	1172.57	414.939		4.464	689.834	229.83
4.092	735.846	202.315		0.372	1172.9	414.408		4.557	680.54	228.657
4.185	725.846	200.827		0.465	1168.58	414.741		4.65	670.197	224.899
4.278	717.641	198.712		0.558	1169.6	412.716		4.743	661.298	222.964
4.371	707.714	197.159		0.651	1167.63	412.425		4.836	653.049	222.168
4.464	697.003	195.916		0.744	1165.05	411.902		4.929	643.902	220.909
4.557	686.328	195.121		0.837	1162.91	411.982		5.022	635.146	219.232
4.65	679.293	192.452		0.93	1181.3	396.534		5.115	631.207	217.525
4.743	671.011	191.05		1.023	1167.7	400.911		5.208	624.288	216.24
4.836	661.583	188.964		1.116	1164.17	400.814		5.301	615.076	214.716
4.929	652.418	186.96		1.209	1159.73	399.712		5.394	607.71	214.899
5.022	645.21	185.88		1.302	1154.99	398.693		5.487	598.476	214.152
5.115	635.184	183.52		1.395	1150	396.616		5.58	590.754	213.094
5.208	624.887	178.952		1.488	1144.38	394.649		5.673	581.774	207.874
5.301	616.998	177.534		1.581	1137.51	392.667		5.766	573.408	207.602
5.394	607.961	176.61		1.674	1131.25	391.149		5.859	565.181	207.511
5.487	599.156	174.994		1.767	1124.33	389.051		5.952	556.564	207.095
5.58	592.433	173.143		1.86	1121.85	375.822		6.045	547.045	206.633
5.673	583.505	172.464		1.953	1114.25	373.648		6.138	538.13	207.453
5.766	574.892	171.298		2.046	1106.2	370.409		6.231	528.917	207.927
5.859	566.457	170.252		2.139	1098.37	368.763		6.324	520.238	209.281
5.952	558.116	169.293		2.232	1089.12	365.728		6.417	512.474	209.938
6.045	549.739	168.308		2.325	1079.43	362.988		6.51	503.904	210.382
6.138	537.806	162.462		2.418	1070.4	360.082		6.603	493.773	209.541
6.231	530.266	162.329		2.511	1061.36	357.269		6.696	486.453	209.595
6.324	521.85	161.328		2.604	1052.51	354.214		6.789	477.499	209.174
6.417	513.903	160.417		2.697	1043.74	351.006		6.882	468.484	208.235
6.51	501.844	150.186		2.79	1040.19	344.724		6.975	462.623	207.885
6.603	493.913	148.916		2.883	1031.15	342.424		7.068	455.003	205.799
6.696	486.117	148.245		2.976	1020.96	340.674		7.161	449.003	205.602
6.789	478.346	147.355		3.069	1011.18	339.955		7.254	440.206	203.936
6.882	470.272	146.612		3.162	1001	338.926		7.347	432.126	202.155
6.975	459.953	144.322		3.255	991.315	337.514		7.44	428.883	198.844
7.068	452.255	143.286		3.348	979.24	334.089		7.533	419.763	198.352
7.161	443.147	142.703		3.441	968.581	331.714		7.626	412.077	197.691
7.254	434.211	141.834		3.534	958.006	329.28		7.719	404.458	197.081
7.347	425.725	141.305		3.627	947.407	326.843		7.812	400.137	195.672
7.44	414.253	137.033		3.72	940.512	321.112		7.905	393.211	195.306
7.533	406.818	136.406		3.813	929.839	319.028		7.998	385.342	195.414
7.626	399.234	136.638		3.906	918.777	316.952		8.091	379.726	196.142
7.719	391.557	135.871		3.999	907.568	315.101		8.184	373.031	195.987
7.812	383.733	135.625		4.092	896.94	313.393		8.277	367.543	195.286
7.905	375.404	135.676		4.185	882.173	307.048		8.37	363.304	193.465
7.998	368.376	135.692		4.278	867.291	302.191		8.463	358.015	195.122
8.091	362.302	135.4		4.371	854.15	300.324		8.556	357.138	194.507
8.184	356.263	135.106		4.464	841.571	298.539		8.649	350.121	194.051
8.277	349.324	135.413		4.557	828.87	297.012		8.742	346.987	195.158
8.37	346.056	131.927		4.65	813.705	293.253		8.835	346.37	196.25
8.463	340.027	131.219		4.743	800.63	291.986		8.928	340.181	195.222
8.556	333.57	131.253		4.836	789.526	291.872		9.021	332.024	194.715
8.649	328.212	131.367		4.929	776.445	290.826		9.114	325.038	194.834
8.742	321.747	131.067		5.022	763.404	289.916		9.207	322.42	196.278
8.835	326.258	126.847		5.115	750.428	289.25		9.3	325.475	195.012
8.928	324.475	128.794		5.208	727.366	273.175		9.393	321.259	188.828
9.021	316.372	128.404		5.301	715.782	270.366		9.486	319.712	190.211
9.114	311.257	127.089		5.394	704.436	268.361		9.579	314.718	190.311
9.207	309.523	124.895		5.487	692.016	265.833		9.672	320.586	192.429
9.3	304.039	123.546		5.58	679.645	263.547		9.765	319.243	192.456
9.393	298.901	123.485		5.673	667.864	262.71		9.858	317.547	195.413
9.486	295.954	121.64		5.766	655.611	260.456		9.951	309.658	195.374
9.579	290.829	122.004		5.859	643.485	258.363		10.044	304.157	195.879
9.672	285.247	121.791		5.952	632.282	256.543		10.137	297.348	196.859
9.765	282.006	120.934		6.045	621.822	253.261		10.23	301.479	201.072
9.858	297.981	115.878		6.138	610.62	251.927		10.323	303.891	200.17
9.951	294.587	114.626		6.231	598.85	250.275		10.416	296.984	202.216
10.044	298.129	110.525		6.324	586.324	248.769		10.509	298.621	206.094
10.137	294.178	107.946		6.417	577.878	247.857		10.602	298.236	209.404
10.23	291.138	106.633		6.51	567.143	245.345		10.695	296.248	193.5
10.323	287.005	105.642		6.603	557.981	244.525		10.788	294.099	196.167
10.416	279.609	105.37		6.696	545.871	243.424		10.881	292.227	199.118
10.509	281.2	101.504		6.789	535.813	242.048		10.974	286.429	202.391
10.602	276.288	100.858		6.882	525.017	240.708		11.067	281.294	206.608
10.695	272.255	99.1879		6.975	514.546	239.003		11.16	284.812	209.554
10.788	265.603	97.5974		7.068	498.461	232.905		11.253	289.349	221.574
10.881	263.517	96.1164		7.161	487.58	232.893		11.346	284.466	229.463
10.974	257.889	93.6259		7.254	477.445	232.104		11.439	283.714	234.761
11.067	251.328	91.7741		7.347	467.479	230.74		11.532	278.433	239.109
11.16	242.294	90.3321		7.44	459.087	228.779		11.625	256.13	198.711
11.253	235.548	89.5497		7.533	450.348	229.108		11.718	282.192	230.43
11.346	229.862	87.9151		7.626	443.513	226.695		11.811	276.514	235.673
11.439	221.597	88.152		7.719	435.614	225.692		11.904	269.762	236.081
11.532	216.645	85.6644		7.812	427.686	224.543
11.625	211.159	83.8445		7.905	417.337	223.59
11.718	214.813	83.4363		7.998	411.915	217.525
11.811	220.363	80.8565		8.091	403.821	215.416
11.904	219.974	80.257		8.184	395.586	213.773
11.997	224.028	75.863		8.277	387.772	211.669
12.09	217.904	74.4851		8.37	379.767	209.865
12.183	208.545	73.9378		8.463	376.08	209.577
12.276	202.37	72.7861		8.556	372.832	208.324
12.369	196.452	71.2507		8.649	363.312	207.594
12.462	192.049	71.6638		8.742	356.905	205.249
12.555	186.145	70.6759		8.835	356.874	202.101
12.648	191.255	75.9559		8.928	343.345	197.79
12.741	165.18	48.8992		9.021	345.999	198.006
12.834	162.47	51.0409		9.114	338.938	195.907
				9.207	330.322	194.15
				9.3	323.315	192.255
				9.393	320.838	192.289
				9.486	322.197	190.359
				9.579	313.204	188.536
				9.672	305.919	186.989
				9.765	298.473	185.817
				9.858	291.804	187.091
				9.951	289.125	187.963
				10.044	285.527	187.937
				10.137	279.507	187.757
				10.23	272.069	187.64
				10.323	283.705	203.773
				10.416	299.735	207.143
				10.509	296.736	208.165
				10.602	291.497	208.677
				10.695	301.53	210.36

## Sheet: ANOVA (ΔP=-0.05 M) 
One -way ANOVA at time 0s
Significance level	α =	0.05
	mean	stdev	N
Steady-state 0.4 M	993.169	240.749	279
0 min after ΔP=-0.05 M	1065.23	319.395	193
10 min after ΔP=-0.05 M	1077.51	241.931	182
						ANOVA between steady-state and 0 min after shock	ANOVA between 0 min and 10 min after shock	ANOVA between steady-state and 10 min after shock
Overall mean	m=	1037.9				1022.63	1071.19	1026.47
Between-group degrees of freedom	dfb=	2				1	1	1
Between-group mean square value	MSb=	493942				592346	14129.8	783492
Within-group degrees of freedom	dfw=	651				470	373	459
Within-group mean square value	MSw=	71111.3				75956.2	80913.1	58184.9
F-ratio	F=	6.94604				7.79852	0.174629	13.4656
Critical value	Fcrit=	3.00956				3.86132	3.86651	3.8618
p-value	p=	0.0010354				0.00544216	0.676271	0.000271505
There is a statistically significant difference between conditions						The difference between steady-state and 0 min after shock is statistically significant	The difference between 0 min and 10 min after shock is not statistically significant	The difference between steady-state and 10 min after shock is statistically significant

## Sheet: ANOVA (ΔP=-0.1 M)
One -way ANOVA at time 0s
Significance level	α =	0.05
	mean	stdev	N
Steady-state 0.4 M	996.877	294.454	413
0 min after ΔP=-0.1 M	1052.48	287.296	190
10 min after ΔP=-0.1 M	970.231	234.312	186
						ANOVA between steady-state and 0 min after shock	ANOVA between 0 min and 10 min after shock	ANOVA between steady-state and 10 min after shock
Overall mean	m=	1003.99				1014.4	1011.79	988.603
Between-group degrees of freedom	dfb=	2				1	1	1
Between-group mean square value	MSb=	339830				402361	635866	91056.3
Within-group degrees of freedom	dfw=	786				601	374	597
Within-group mean square value	MSw=	78216.9				85393.6	68868.5	76848.6
F-ratio	F=	4.34471				4.71184	9.23304	1.18488
Critical value	Fcrit=	3.00718				3.85698	3.86644	3.85708
p-value	p=	0.0132883				0.0303463	0.00254389	0.276804
There is a statistically significant difference between conditions						The difference between steady-state and 0 min after shock is statistically significant	The difference between 0 min and 10 min after shock is not statistically significant	The difference between steady-state and 10 min after shock is not statistically significant

## Sheet: ANOVA (ΔP=-0.2 M)
One -way ANOVA at time 0s
Significance level	α =	0.05
	mean	stdev	N
Steady-state 0.4 M	989.809	231.995	269
0 min after ΔP=-0.2 M	1183.06	406.034	396
10 min after ΔP=-0.2 M	993.356	267.573	309
						ANOVA between steady-state and 0 min after shock	ANOVA between 0 min and 10 min after shock	ANOVA between steady-state and 10 min after shock
Overall mean	m=	1069.5				1104.89	1099.91	991.706
Between-group degrees of freedom	dfb=	2				1	1	1
Between-group mean square value	MSb=	4.30313e+06				5.98205e+06	6.24594e+06	1809.28
Within-group degrees of freedom	dfw=	971				663	703	576
Within-group mean square value	MSw=	104631				119978	124001	63325.7
F-ratio	F=	41.1266				49.8595	50.3701	0.028571
Critical value	Fcrit=	3.00499				3.85552	3.85472	3.85765
p-value	p=	0				4.1811e-12	3.11795e-12	0.865833
There is a statistically significant difference between conditions						The difference between steady-state and 0 min after shock is statistically significant	The difference between 0 min and 10 min after shock is not statistically significant	The difference between steady-state and 10 min after shock is not statistically significant
