# Supplementary material for: Rapid adaptation of endocytosis, exocytosis, and eisosomes after an acute increase in membrane tension in yeast cells
Source: eLife. 2021 May 13;10:e62084. doi: 10.7554/eLife.62084 (PMC9045820; doi:10.7554/eLife.62084)
Supplement: Figure 7—source data 2. [file elife-62084-fig7-data2.xlsx]

## Sheet: Peak number of molecules
WT
Protoplats
ΔP=-0.2 M
	Peak number of molecule (#)	CI 95%	SD	N
Steady state in 0.4M	989.809	24.3723	203.029	269
0 min after ΔP=-0.2 M	1183.06	37.0955	375.481	396
2 min after ΔP=-0.2 M	1068.58	39.1109	220.022	124
4 min after ΔP=-0.2 M	992.963	40.0313	227.962	127
6 min after ΔP=-0.2 M	975.962	41.4823	280.443	178
8 min after ΔP=-0.2 M	1012.36	27.9584	226.704	255
10 min after ΔP=-0.2 M	993.356	26.8273	239.662	309

## Sheet: ANOVA
One -way ANOVA
Significance level	α =	0.05
	mean	stdev	N
Steady state in 0.4M	989.809	203.029	269
0 min after ΔP=-0.05 M	1183.06	375.481	396
2 min after ΔP=-0.05 M	1068.58	220.022	124
4 min after ΔP=-0.05 M	992.963	227.962	127
6 min after ΔP=-0.05 M	975.962	280.443	178
8 min after ΔP=-0.05 M	1012.36	226.704	255
10 min after ΔP=-0.05 M	993.356	239.662	309
						ANOVA between steady-state and 0 min after shock	ANOVA between steady-state and 2 min after shock	ANOVA between steady-state and 4 min after shock	ANOVA between steady-state and 6 min after shock	ANOVA between steady-state and 8 min after shock	ANOVA between steady-state and 10 min after shock
Overall mean	m=	1044.74				1104.89	1014.66	990.821	984.295	1000.78	991.706
Between-group degrees of freedom	dfb=	6				1	1	1	1	1	1
Between-group mean square value	MSb=	1.7873e+06				5.98204e+06	526684	858.012	20540.5	66585	1809.23
Within-group degrees of freedom	dfw=	1651				663	391	394	445	522	576
Within-group mean square value	MSw=	75048.3				100659	43482.4	44657.3	56107.8	46171.4	49892.4
F-ratio	F=	23.8154				59.429	12.1126	0.0192132	0.366091	1.44213	0.0362626
Critical value	Fcrit=	2.10406				3.85552	3.86535	3.86517	3.86244	3.85933	3.85765
p-value	p=	0				4.65183e-14	0.000557266	0.889828	0.545451	0.23034	0.849041
There is a statistically significant difference between all conditions						The difference between steady-state and 0 min after shock is statistically significant	The difference between steady-state and 2 min after shock is statistically significant	The difference between steady-state and 4 min after shock is not statistically significant	The difference between steady-state and 6 min after shock is not statistically significant	The difference between steady-state and 8 min after shock is not statistically significant	The difference between steady-state and 10 min after shock is not statistically significant
						ANOVA between 4, 6, 8 and 10 min after shock
						995.313
						3
						47555
						868
						59001.9
						0.805991
						2.61516
						0.490663
						The difference between 4, 6, 8 and 10 min after shock is not statistically significant
