# Supplementary material for: Rapid adaptation of endocytosis, exocytosis, and eisosomes after an acute increase in membrane tension in yeast cells
Source: eLife. 2021 May 13;10:e62084. doi: 10.7554/eLife.62084 (PMC9045820; doi:10.7554/eLife.62084)
Supplement: Figure 7—source data 3. [file elife-62084-fig7-data3.xlsx]

## Sheet: ΔP=-0.05 M
pil1Δ				pil1Δ				pil1Δ
Protoplats				Protoplats				Protoplats
Steady state in 0.4 M				ΔP=-0.05 M				ΔP=-0.05 M
				0 min				10 min
N=	429			N=	183			N=	206
Number of molecules (#)				Number of molecules (#)				Number of molecules (#)
time	mean	stdev		time	mean	stdev		time	mean	stdev
-7.905	193.593	150.42		-6.51	234.752	192.553		-6.045	149.27	72.6832
-7.812	198.373	150.306		-6.417	246.051	192.829		-5.952	162.736	74.4739
-7.719	202.545	150.668		-6.324	252.452	190.694		-5.859	172.395	75.5715
-7.626	207.523	147.593		-6.231	250.141	182.762		-5.766	180.251	79.4334
-7.533	201.427	134.034		-6.138	247.949	175.083		-5.673	181.011	74.757
-7.44	207.482	131.938		-6.045	258.007	172.013		-5.58	190.416	74.9413
-7.347	214.837	133.31		-5.952	270.298	172.62		-5.487	200.549	78.4021
-7.254	222.784	134.352		-5.859	279.933	170.126		-5.394	212.229	81.5616
-7.161	224.313	132.744		-5.766	289.836	168.206		-5.301	219.537	85.0624
-7.068	226.241	130.341		-5.673	294.906	165.94		-5.208	227.866	87.2958
-6.975	232.727	139.46		-5.58	309.753	168.27		-5.115	231.036	90.993
-6.882	236.651	138.845		-5.487	329.174	177.814		-5.022	242.362	93.7687
-6.789	240.176	138.216		-5.394	339.573	178.152		-4.929	252.64	100.657
-6.696	245.829	138.435		-5.301	352.735	176.713		-4.836	259.603	103.786
-6.603	250.785	136.203		-5.208	369.478	175.06		-4.743	268.514	105.185
-6.51	257.411	141.224		-5.115	383.025	175.134		-4.65	283.615	106.215
-6.417	264.415	142.559		-5.022	389.656	179.377		-4.557	296.662	107.184
-6.324	271.064	140.643		-4.929	405.568	178.257		-4.464	311.224	109.603
-6.231	278.15	140.837		-4.836	419.838	179.273		-4.371	325.892	111.144
-6.138	284.579	141.761		-4.743	437.227	179.516		-4.278	341.189	111.951
-6.045	287.551	144.001		-4.65	448.503	179.926		-4.185	358.712	113.198
-5.952	295.76	145.278		-4.557	461.212	181.709		-4.092	378.076	121.185
-5.859	301.638	145.682		-4.464	478.794	181.72		-3.999	395.785	122.428
-5.766	312.028	145.782		-4.371	496.199	181.123		-3.906	414.749	123.771
-5.673	324.62	145.981		-4.278	513.634	179.196		-3.813	432.2	124.902
-5.58	335.692	148.862		-4.185	532.149	178.99		-3.72	450.453	126.512
-5.487	346.059	150.417		-4.092	549.68	179.289		-3.627	469.723	128.341
-5.394	357.48	151.189		-3.999	564.41	179.179		-3.534	486.556	130.859
-5.301	369.694	150.924		-3.906	581.672	179.1		-3.441	507.298	133.581
-5.208	383.944	151.136		-3.813	599.957	180.421		-3.348	527.595	135.243
-5.115	398.2	150.909		-3.72	618.371	181.96		-3.255	553.202	148.033
-5.022	410.681	151.007		-3.627	635.82	191.547		-3.162	569.048	151.158
-4.929	423.379	150.825		-3.534	655.548	191.546		-3.069	590.563	152.445
-4.836	438.118	151.06		-3.441	674.586	192.725		-2.976	610.673	154.73
-4.743	450.651	151.542		-3.348	693.709	193.635		-2.883	630.916	157.388
-4.65	464.949	151.762		-3.255	712.633	193.781		-2.79	651.062	160.071
-4.557	478.905	152.63		-3.162	731.492	207.286		-2.697	672.404	163.347
-4.464	493.425	153.361		-3.069	751.178	207.621		-2.604	691.291	166.678
-4.371	508.348	154.093		-2.976	770.82	207.434		-2.511	711.574	169.944
-4.278	522.809	155.069		-2.883	790.254	207.738		-2.418	731.775	173.221
-4.185	537.471	156.394		-2.79	810.977	208.414		-2.325	751.418	176.697
-4.092	556.153	168.684		-2.697	832.364	209.475		-2.232	769.758	178.155
-3.999	571.523	169.662		-2.604	852.082	209.688		-2.139	788.181	180.064
-3.906	586.399	170.485		-2.511	871.221	210.577		-2.046	805.217	181.202
-3.813	602.196	171.567		-2.418	890.414	212.087		-1.953	822.495	182.849
-3.72	618.217	172.699		-2.325	909.097	214.23		-1.86	838.743	184.86
-3.627	634.538	174.376		-2.232	924.675	219.366		-1.767	854.714	186.858
-3.534	650.424	176.149		-2.139	942.286	221.842		-1.674	869.49	188.689
-3.441	666.422	178.077		-2.046	959.471	224.348		-1.581	883.217	190.359
-3.348	682.55	179.912		-1.953	976.3	227.504		-1.488	897.649	191.949
-3.255	697.688	182.646		-1.86	992.642	231.039		-1.395	908.258	196.309
-3.162	712.99	185.099		-1.767	998.197	246.173		-1.302	919.458	199.298
-3.069	728.695	187.606		-1.674	1011.14	247.846		-1.209	929.971	201.291
-2.976	744.193	189.251		-1.581	1024.57	248.736		-1.116	939.759	203.419
-2.883	759.431	191.293		-1.488	1036.26	250.019		-1.023	948.451	205.377
-2.79	774.475	193.712		-1.395	1047.1	251.715		-0.93	956.058	207.988
-2.697	791.695	203.434		-1.302	1060.8	264.547		-0.837	963.237	210.199
-2.604	805.981	205.046		-1.209	1069.9	265.603		-0.744	969.792	212.423
-2.511	820.058	207.375		-1.116	1078.04	266.452		-0.651	976.492	213.642
-2.418	833.324	209.392		-1.023	1085.43	267.317		-0.558	981.758	215.265
-2.325	846.174	211.466		-0.93	1092.21	268.164		-0.465	987.861	217.118
-2.232	857.682	213.497		-0.837	1093.33	271.894		-0.372	995.233	217.561
-2.139	868.648	215.57		-0.744	1097.75	272.241		-0.279	998.608	219.535
-2.046	878.889	217.692		-0.651	1102.37	271.82		-0.186	1002.89	221.393
-1.953	888.866	219.683		-0.558	1105.61	272.239		-0.093	1004.27	222.53
-1.86	898.294	222.153		-0.465	1108.47	272.991		0	1009.26	223.769
-1.767	908.869	227.399		-0.372	1111.43	274.132		0.093	1003.06	232.646
-1.674	917.049	229.042		-0.279	1113.25	275.213		0.186	1002.78	233.711
-1.581	924.258	231.212		-0.186	1113.67	276.723		0.279	1001.12	235.312
-1.488	930.999	233.441		-0.093	1114.86	277.996		0.372	1000.43	236.18
-1.395	936.941	235.624		0	1115.83	279.688		0.465	997.793	237.297
-1.302	943.585	241.912		0.093	1110.96	287.731		0.558	994.109	238.071
-1.209	948.335	243.273		0.186	1110.12	287.692		0.651	991.985	238.804
-1.116	951.882	243.042		0.279	1108.95	287.902		0.744	990.815	238.147
-1.023	954.892	243.852		0.372	1108.84	288.382		0.837	988.653	238.104
-0.93	957.467	244.566		0.465	1109.16	288.769		0.93	983.27	236.376
-0.837	954.585	250.719		0.558	1107.44	289.556		1.023	983.525	237.926
-0.744	955.913	251.456		0.651	1105.81	291.374		1.116	980.415	239.622
-0.651	957.495	252.075		0.744	1103.97	292.684		1.209	977.873	242.195
-0.558	958.185	252.613		0.837	1101.84	293.821		1.302	973.852	243.688
-0.465	957.89	253.625		0.93	1099.63	294.663		1.395	970.849	245.557
-0.372	959.812	255.901		1.023	1095.12	295.51		1.488	963.531	244.645
-0.279	959.953	257.117		1.116	1090.95	294.794		1.581	958.286	244.858
-0.186	959.801	257.955		1.209	1086.49	293.978		1.674	952.935	245.714
-0.093	959.286	258.851		1.302	1081.42	293.046		1.767	947.423	245.965
0	960.029	258.573		1.395	1075.42	292.301		1.86	949.641	246.22
0.093	954.783	265.566		1.488	1071.48	291.801		1.953	938.47	251.439
0.186	953.143	266.205		1.581	1065.38	290.809		2.046	932.072	251.475
0.279	951.479	266.275		1.674	1059.19	288.303		2.139	925.72	251.08
0.372	949.394	266.908		1.767	1052.6	287.795		2.232	918.974	250.514
0.465	946.348	267.065		1.86	1039.57	276.125		2.325	915.952	249.44
0.558	939.819	268.509		1.953	1034.68	273.659		2.418	908.113	249.224
0.651	936.283	268.401		2.046	1025.03	272.069		2.511	900.764	248.455
0.744	932.377	267.064		2.139	1016.08	269.084		2.604	892.842	247.446
0.837	928.947	266.21		2.232	1007.56	266.308		2.697	885.855	245.34
0.93	923.921	263.298		2.325	996.777	255.384		2.79	875.364	240.246
1.023	920.272	261.722		2.418	980.767	261.27		2.883	863.3	244.901
1.116	917.432	261.139		2.511	971.751	258.488		2.976	854.169	242.141
1.209	913.857	260.57		2.604	962.289	255.833		3.069	844.186	239.858
1.302	910.214	259.138		2.697	951.693	253.663		3.162	835.753	238.497
1.395	905.514	258.762		2.79	942.743	250.066		3.255	827.418	237.539
1.488	901.361	257.802		2.883	934.029	249.155		3.348	822.338	234.041
1.581	897.234	256.798		2.976	925.143	247.645		3.441	813.058	231.822
1.674	892.403	255.831		3.069	916.54	245.516		3.534	804.223	230.269
1.767	888.119	254.225		3.162	908.746	244.56		3.627	795.469	228.578
1.86	883.653	252.18		3.255	904.267	242.323		3.72	787.11	227.335
1.953	876.796	251.755		3.348	895.922	240.947		3.813	778.873	227.187
2.046	871.38	250.201		3.441	888.394	240.765		3.906	770.578	226.402
2.139	865.883	248.992		3.534	881.301	240.053		3.999	762.418	224.901
2.232	859.891	247.781		3.627	874.475	239.627		4.092	754.958	223.5
2.325	854.909	246.674		3.72	867.776	240.346		4.185	747.807	222.14
2.418	848.029	244.757		3.813	858.549	237.878		4.278	743.78	221.648
2.511	841.663	243.178		3.906	851.704	236.085		4.371	735.404	220.555
2.604	835.884	241.961		3.999	844.191	233.514		4.464	727.6	220.046
2.697	828.943	240.35		4.092	836.134	230.984		4.557	719.368	219.916
2.79	823.738	237.407		4.185	830.255	227.656		4.65	707.933	216.662
2.883	814.512	236.106		4.278	822.345	225.491		4.743	695.615	220.465
2.976	808.043	235.217		4.371	813.753	223.81		4.836	687.294	219.378
3.069	801.545	234.396		4.464	804.896	221.658		4.929	679.602	218.902
3.162	795.473	233.493		4.557	796.229	220.36		5.022	671.449	217.928
3.255	789.023	231.798		4.65	786.793	218.795		5.115	666.837	216.785
3.348	779.231	233.757		4.743	776.944	217.151		5.208	659.169	215.991
3.441	771.832	231.4		4.836	767.1	215.599		5.301	650.859	213.882
3.534	764.74	229.929		4.929	757.17	214.239		5.394	641.782	211.315
3.627	757.892	227.701		5.022	747.267	212.919		5.487	633.379	208.987
3.72	752.56	226.179		5.115	741.303	209.942		5.58	630.548	205.189
3.813	745.218	223.533		5.208	731.889	209.424		5.673	621.793	202.644
3.906	738.895	221.355		5.301	721.865	208.914		5.766	613.053	200.171
3.999	732.603	220.197		5.394	712.69	208.28		5.859	604.116	197.86
4.092	725.914	218.542		5.487	703.227	207.702		5.952	596.745	195.362
4.185	719.217	216.75		5.58	693.809	206.688		6.045	589.378	193.166
4.278	713.607	214.825		5.673	685.979	205.648		6.138	581.896	193.148
4.371	707.345	213.267		5.766	677.104	204.13		6.231	574.835	192.604
4.464	701.322	212.182		5.859	668.754	202.83		6.324	567.128	191.868
4.557	694.835	211.377		5.952	661.229	202.033		6.417	559.514	191.3
4.65	688.076	208.652		6.045	652.682	201.137		6.51	551.941	190.702
4.743	681.83	208.066		6.138	645.104	199.891		6.603	542.593	190.082
4.836	674.818	207.601		6.231	636.556	198.414		6.696	534.926	190.124
4.929	668.203	207.183		6.324	628.941	197.276		6.789	528.434	189.7
5.022	661.994	206.905		6.417	621.163	196.209		6.882	520.168	190.092
5.115	657.05	204.892		6.51	613.576	195.24		6.975	512.028	190.051
5.208	647.799	199.778		6.603	606.517	193.493		7.068	504.027	191.036
5.301	640.826	199.017		6.696	599.466	192.707		7.161	495.37	190.386
5.394	633.583	197.879		6.789	591.226	190.761		7.254	487.482	191.259
5.487	627.163	196.133		6.882	582.694	189.678		7.347	478.789	190.851
5.58	618.567	190.954		6.975	575.936	187.711		7.44	470.457	189.874
5.673	611.486	190.298		7.068	567.058	186.892		7.533	463.473	188.933
5.766	604.451	189.226		7.161	560.83	184.801		7.626	455.426	187.329
5.859	597.538	188.083		7.254	552.583	183.755		7.719	448.252	186.223
5.952	590.968	187.225		7.347	545.219	183.329		7.812	440.862	185.171
6.045	582.887	184.82		7.44	536.8	182.654		7.905	433.699	184.255
6.138	577	184.314		7.533	524.299	173.526		7.998	423.291	177.718
6.231	570.469	183.366		7.626	515.632	173.043		8.091	416.7	176.658
6.324	563.94	182.468		7.719	507.557	172.258		8.184	409.238	174.64
6.417	557.348	181.418		7.812	501.587	171.226		8.277	403.508	176.188
6.51	552.252	179.676		7.905	492.807	170.907		8.37	398.05	174.006
6.603	546.165	178.414		7.998	484.044	170.773		8.463	391.704	172.921
6.696	539.759	177.258		8.091	475.782	172.568		8.556	386.633	173.59
6.789	533.267	175.974		8.184	468.733	172.99		8.649	379.409	172.488
6.882	526.767	174.869		8.277	462.349	171.832		8.742	374.047	171.255
6.975	522.539	173.035		8.37	453.777	171.803		8.835	369.747	170.283
7.068	515.624	171.798		8.463	442.302	160.242		8.928	364.934	169.797
7.161	509.428	171.619		8.556	434.715	159.425		9.021	358.262	169.193
7.254	502.697	170.972		8.649	427.437	158.459		9.114	351.253	169.498
7.347	496.06	170.383		8.742	420.346	157.586		9.207	345.513	168.051
7.44	489.592	168.927		8.835	416.807	155.553		9.3	342.841	166.927
7.533	482.27	168.881		8.928	412.359	155.04		9.393	338.305	167.848
7.626	475.428	168.605		9.021	405.562	154.312		9.486	332.253	167.73
7.719	470.196	167.642		9.114	399.373	154.364		9.579	329.834	166.911
7.812	464.345	167.47		9.207	392.963	154.364		9.672	323.523	166.011
7.905	459.265	166.422		9.3	388.287	152.443		9.765	319.245	165.438
7.998	449.901	164.875		9.393	377.907	148.002		9.858	316.341	162.708
8.091	444.641	164.432		9.486	371.29	147.031		9.951	311.688	162.198
8.184	438.47	163.663		9.579	363.374	146.258		10.044	304.89	163.027
8.277	432.031	163.277		9.672	356.311	145.331		10.137	300.158	162.668
8.37	424.296	155.713		9.765	348.407	145.442		10.23	296.166	161.742
8.463	419.185	155.439		9.858	342.054	145.205		10.323	297.007	162.64
8.556	413.632	154.901		9.951	333.694	143.936		10.416	293.78	163.752
8.649	408.198	154.448		10.044	326.661	142.856		10.509	286.873	163.789
8.742	403.005	154.405		10.137	318.474	141.614		10.602	285.877	163.13
8.835	398.976	152.982		10.23	312.274	139.976		10.695	295.162	160.888
8.928	392.536	150.135		10.323	313.414	132.596		10.788	287.913	159.45
9.021	386.705	150.447		10.416	307.472	132.357		10.881	283.932	157.657
9.114	381.794	150.699		10.509	304.773	130.296		10.974	285.148	159.029
9.207	376.509	150.381		10.602	305.227	126.865		11.067	282.829	158.744
9.3	373.924	148.425		10.695	297.254	125.714		11.16	289.107	157.14
9.393	368.601	148.663		10.788	296.243	123.759		11.253	286.156	156.25
9.486	365.005	147.784		10.881	291.271	123.073		11.346	278.813	154.729
9.579	359.78	147.888		10.974	285.406	123.471		11.439	271.57	153.274
9.672	354.255	147.158		11.067	282.277	123.311		11.532	280.267	150.819
9.765	349.868	145.869		11.16	277.421	121.219		11.625	278.584	147.793
9.858	348.833	143.346		11.253	279.583	122.266		11.718	269.122	147.147
9.951	343.847	142.193		11.346	275.541	118.638		11.811	266.68	149.315
10.044	337.889	141.512		11.439	271.134	116.477		11.904	268.911	146.811
10.137	333.826	140.882		11.532	266.888	114.19		11.997	271.853	143.792
10.23	332.964	138.564		11.625	260.103	112.525		12.09	270.367	140.64
10.323	327.637	137.423		11.718	257.013	112.891		12.183	264.877	140.874
10.416	323.017	136.341		11.811	252.314	111.651		12.276	257.087	140.367
10.509	315.729	135.044		11.904	254.42	110.448		12.369	251.281	139.412
10.602	310.789	133.692		11.997	247.842	109.539		12.462	240.212	137.922
10.695	306.152	132.533		12.09	244.755	107.638		12.555	231.925	134.397
10.788	305.791	131.524		12.183	244.472	97.5806		12.648	229.211	130.417
10.881	301.565	130.521		12.276	240.709	98.2562		12.741	221.226	126.093
10.974	297.793	129.531		12.369	246.693	91.4642		12.834	218.25	122.238
11.067	292.545	128.75		12.462	242.556	90.8176		12.927	215.842	117.826
11.16	286.639	128.191		12.555	236.023	89.8727		13.02	207.767	113.508
11.253	284.44	127.174		12.648	223.673	88.8201		13.113	186.669	104.698
11.346	280.082	127.108		12.741	217.075	88.1168		13.206	183.481	101.79
11.439	279.033	126.787		12.834	211.954	88.8		13.299	175.962	97.6067
11.532	273.225	126.553		12.927	205.101	88.353		13.392	175.759	97.3427
11.625	270.205	125.446		13.02	197.826	87.6131		13.485	181.945	92.4105
11.718	267.858	124.945		13.113	208.487	86.6058
11.811	261.923	124.016		13.206	206.027	86.0999
11.904	259.118	123.433		13.299	220.46	82.0629
11.997	257.591	122.512
12.09	254.401	121.872
12.183	252.59	122.387
12.276	250.824	121.167
12.369	248.423	120.464
12.462	246.485	119.78
12.555	243.415	119.367
12.648	228.886	95.3049
12.741	226.814	95.7217
12.834	223.71	95.4811
12.927	220.43	94.0339
13.02	217.43	93.3922
13.113	215.248	94.3305
13.206	208.648	91.331
13.299	204.274	90.1239
13.392	200.046	88.9771
13.485	196.678	88.2738
13.578	191.907	85.3293
13.671	191.655	86.8037
13.764	189.223	87.1738
13.857	188.153	86.2181
13.95	185.019	86.1228
14.043	184.51	87.1592
14.136	180.882	88.2563
14.229	178.5	87.7844
14.322	177.736	89.4292
14.415	175.539	88.9787
14.508	171.224	83.8834
14.601	169.633	82.4886
14.694	167.087	81.2445
14.787	162.427	78.6284
14.88	157.387	74.9972
14.973	154.272	75.7472
15.066	153.005	77.8532
15.159	147.325	74.3667
15.252	143.095	72.2346
15.345	139.285	70.2432

## Sheet: ΔP=-0.1 M
pil1Δ				pil1Δ
Protoplats				Protoplats
Steady state in 0.4 M				ΔP=-0.1 M
				0 min
N=	95			N=	215
Number of molecules (#)				Number of molecules (#)
time	mean	stdev		time	mean	stdev
-6.975	153.112	62.3733		-14.322	300.635	394.822
-6.882	161.286	59.3712		-14.229	301.697	385.053
-6.789	169.459	56.6787		-14.136	303.941	379.911
-6.696	176.272	53.1081		-14.043	305.644	372.963
-6.603	180.252	49.5979		-13.95	296.117	358.18
-6.51	187.577	49.8915		-13.857	299.75	353.386
-6.417	197.378	50.3695		-13.764	304.275	350.279
-6.324	204.431	52.1317		-13.671	308.891	347.202
-6.231	214.405	53.4008		-13.578	311.709	342.998
-6.138	221.837	54.1405		-13.485	312.67	337.892
-6.045	225.406	59.2723		-13.392	326.593	339.319
-5.952	237.166	59.9645		-13.299	331.742	337.054
-5.859	243.535	63.5345		-13.206	336.824	334.829
-5.766	247.818	67.146		-13.113	338.037	330.904
-5.673	255.17	70.3142		-13.02	339.627	327.055
-5.58	267.16	70.5271		-12.927	344.045	323.815
-5.487	285.492	115.33		-12.834	349.436	321.946
-5.394	297.242	110.821		-12.741	354.804	320.17
-5.301	309.007	108.122		-12.648	360.304	318.48
-5.208	319.49	105.019		-12.555	363.184	314.846
-5.115	326.374	103.941		-12.462	374.553	313.088
-5.022	330.015	106.76		-12.369	380.895	311.18
-4.929	336.026	106.951		-12.276	387.407	309.356
-4.836	342.999	105.281		-12.183	393.972	307.274
-4.743	351.968	101.782		-12.09	398.105	305.178
-4.65	362.356	100.557		-11.997	404.648	303.144
-4.557	383.651	110.585		-11.904	403.849	301.016
-4.464	398.632	109.871		-11.811	408.002	299.111
-4.371	410.779	110.407		-11.718	414.363	297.431
-4.278	424.956	109.452		-11.625	415.525	296.304
-4.185	446.268	118.866		-11.532	425.63	293.423
-4.092	462.449	118.024		-11.439	431.925	292.254
-3.999	479.932	120.15		-11.346	438.349	291.057
-3.906	494.893	121.419		-11.253	444.703	289.908
-3.813	505.679	122.82		-11.16	448.272	288.218
-3.72	521.667	123.374		-11.067	451.512	286.259
-3.627	537.003	125.788		-10.974	458.005	285.49
-3.534	551.689	128.156		-10.881	464.574	284.753
-3.441	566.471	131.015		-10.788	471.168	284.115
-3.348	582	133.345		-10.695	477.831	283.565
-3.255	597.266	136.793		-10.602	500.813	300.23
-3.162	613.818	140.735		-10.509	507.855	299.3
-3.069	634.359	144.812		-10.416	514.665	298.517
-2.976	650.668	149.317		-10.323	521.639	298.111
-2.883	666.612	154.034		-10.23	528.776	296.57
-2.79	682.396	158.848		-10.137	533.46	296.466
-2.697	698.138	164.024		-10.044	537.533	297.323
-2.604	714.414	169.496		-9.951	542.778	296.913
-2.511	730.751	175.247		-9.858	549.982	296.718
-2.418	746.56	181.027		-9.765	553.559	297.148
-2.325	761.814	186.88		-9.672	562.147	294.345
-2.232	775.626	189.322		-9.579	567.501	293.981
-2.139	788.956	191.222		-9.486	574.935	293.657
-2.046	801.953	193.123		-9.393	582.353	293.357
-1.953	814.529	195.197		-9.3	589.7	293.233
-1.86	824.769	195.517		-9.207	597.183	293.015
-1.767	835.678	197.094		-9.114	604.818	292.793
-1.674	846.049	198.79		-9.021	612.462	292.668
-1.581	856.16	200.895		-8.928	620.051	292.646
-1.488	866.017	203.123		-8.835	628.229	291.872
-1.395	875.42	205.635		-8.742	633.596	292.833
-1.302	884.033	207.304		-8.649	641.405	292.741
-1.209	889.859	207.574		-8.556	649.105	292.805
-1.116	896.621	209.449		-8.463	656.945	291.743
-1.023	902.04	210.22		-8.37	664.474	291.67
-0.93	906.084	211.084		-8.277	675.284	294.099
-0.837	904.818	211.496		-8.184	682.587	294.269
-0.744	908.696	212.788		-8.091	690.002	294.447
-0.651	912.554	214.371		-7.998	697.444	294.767
-0.558	916.518	216.054		-7.905	702.21	294.289
-0.465	920.22	216.486		-7.812	708.96	294.158
-0.372	922.901	215.974		-7.719	715.717	293.086
-0.279	925.135	215.138		-7.626	722.555	292.132
-0.186	926.729	212.874		-7.533	729.602	291.732
-0.093	928.196	210.298		-7.44	736.671	291.638
0	928.589	208.324		-7.347	746.268	292.215
0.093	924.003	209.757		-7.254	753.403	292.404
0.186	923.47	207.645		-7.161	760.417	292.902
0.279	922.513	202.944		-7.068	767.391	293.593
0.372	922.726	200.093		-6.975	774.492	294.466
0.465	922.755	197.633		-6.882	781.061	292.112
0.558	916.045	213.409		-6.789	781.529	299.242
0.651	913.676	210.498		-6.696	789.547	300.072
0.744	910.58	207.85		-6.603	796.89	301.711
0.837	907.625	205.134		-6.51	804.061	303.312
0.93	900.89	201.274		-6.417	811.427	305.185
1.023	897.904	199.893		-6.324	818.781	307.35
1.116	895.15	198.685		-6.231	826.197	309.685
1.209	892.19	197.827		-6.138	833.569	312.135
1.302	889.25	197.238		-6.045	840.746	314.768
1.395	884.035	196.837		-5.952	846.675	317.25
1.488	882.341	197.258		-5.859	849.048	323.088
1.581	876.559	193.669		-5.766	856.132	324.049
1.674	873.703	193.951		-5.673	863.232	324.945
1.767	868.266	195.72		-5.58	870.539	326.067
1.86	863.887	196.969		-5.487	877.664	327.127
1.953	859.622	194.978		-5.394	884.98	328.407
2.046	854.774	193.073		-5.301	891.116	329.214
2.139	850.146	191.313		-5.208	898.517	330.853
2.232	845.491	189.798		-5.115	906.077	332.596
2.325	840.814	188.699		-5.022	912.706	333.581
2.418	838.428	183.04		-4.929	919.208	335.293
2.511	834.143	181.279		-4.836	925.494	337.297
2.604	829.011	179.026		-4.743	931.885	339.631
2.697	822.568	177.739		-4.65	938.242	342.234
2.79	814.978	176.018		-4.557	944.579	345.009
2.883	810.664	175.883		-4.464	941.816	355.343
2.976	805.897	174.704		-4.371	948.037	357.72
3.069	799.907	172.772		-4.278	954.107	360.184
3.162	794.843	171.93		-4.185	960.101	362.807
3.255	789.037	171.128		-4.092	965.596	366.707
3.348	780.674	171.635		-3.999	972.108	371.551
3.441	773.948	170.63		-3.906	978.241	374.46
3.534	767.375	169.754		-3.813	984.203	377.291
3.627	760.47	167.965		-3.72	990.003	379.895
3.72	752.956	164.442		-3.627	995.899	382.589
3.813	744.804	162.29		-3.534	1002.06	385.871
3.906	736.69	160.581		-3.441	1008.13	389.184
3.999	728.644	159.156		-3.348	1015.92	392.147
4.092	720.826	158.026		-3.255	1023.26	395.077
4.185	713.598	157.07		-3.162	1025.18	399.747
4.278	704.479	155.968		-3.069	1033.15	401.751
4.371	697.593	153.988		-2.976	1038.7	403.622
4.464	690.89	152.075		-2.883	1044.35	405.67
4.557	684.144	150.297		-2.79	1049.83	407.938
4.65	670.672	139.151		-2.697	1057.01	409.683
4.743	663.73	137.406		-2.604	1065.28	424.546
4.836	656.915	136.004		-2.511	1070.61	426.584
4.929	649.859	134.843		-2.418	1075.53	428.519
5.022	639.299	131.653		-2.325	1080.44	430.594
5.115	632.015	130.556		-2.232	1085.48	432.805
5.208	622.866	130.476		-2.139	1089.76	433.94
5.301	615.097	130.749		-2.046	1093.87	435.282
5.394	608.492	130.54		-1.953	1097.9	436.555
5.487	600.538	130.952		-1.86	1101.04	439.116
5.58	586.478	113.809		-1.767	1103.02	440.793
5.673	578.741	113.046		-1.674	1106.74	442.212
5.766	570.854	113.437		-1.581	1110.45	443.546
5.859	563.546	114.05		-1.488	1114.23	443.595
5.952	555.561	113.977		-1.395	1117.76	445.037
6.045	547.266	114.05		-1.302	1118.72	444.853
6.138	535.866	112.006		-1.209	1124.21	446.458
6.231	528.263	111.295		-1.116	1126.27	445.951
6.324	520.743	110.909		-1.023	1128.35	446.046
6.417	514.012	110.28		-0.93	1130.26	446.002
6.51	507.216	110.182		-0.837	1132.4	446.262
6.603	500.468	110.595		-0.744	1134.01	447.896
6.696	493.766	111.269		-0.651	1135.69	448.498
6.789	487.064	112.185		-0.558	1137.43	449.463
6.882	480.852	113.251		-0.465	1138.59	449.382
6.975	478.042	113.276		-0.372	1137.84	451.907
7.068	468.717	114.646		-0.279	1151.2	463.862
7.161	462.545	114.411		-0.186	1152.73	465.183
7.254	453.904	113.79		-0.093	1153.85	465.973
7.347	446.039	114.027		0	1154.95	466.956
7.44	439.374	113.084		0.093	1149.2	460.398
7.533	437.64	110.816		0.186	1151.43	460.072
7.626	430.985	109.654		0.279	1152.21	460.45
7.719	424.331	108.743		0.372	1152.82	460.829
7.812	417.259	107.901		0.465	1153.4	461.401
7.905	410.338	107.229		0.558	1153.5	461.796
7.998	410.858	101.381		0.651	1148.69	464.95
8.091	403.943	100.212		0.744	1148.06	465.959
8.184	394.735	98.6782		0.837	1147.97	466.121
8.277	389.194	98.5424		0.93	1142.71	463.394
8.37	382.555	98.0656		1.023	1142.13	463.477
8.463	375.679	98.9526		1.116	1143.97	463.54
8.556	369.136	99.078		1.209	1142.55	463.138
8.649	362.594	99.4145		1.302	1141.29	462.999
8.742	356.176	99.933		1.395	1139.9	463.013
8.835	349.488	100.517		1.488	1135.83	461.784
8.928	342.861	101.144		1.581	1128.53	465.709
9.021	336.063	100.812		1.674	1126.86	465.392
9.114	328.995	100.661		1.767	1124.87	464.578
9.207	325.031	99.1052		1.86	1123.08	463.683
9.3	327.441	89.612		1.953	1121.81	463.357
9.393	324.124	85.6882		2.046	1120.49	463.041
9.486	317.279	85.2361		2.139	1119.56	463.261
9.579	310.433	85.1085		2.232	1118.4	463.43
9.672	303.601	85.3006		2.325	1117.18	463.772
9.765	303.089	81.8346		2.418	1111.31	461.255
9.858	298.181	79.3689		2.511	1110.32	461.46
9.951	292.428	78.6739		2.604	1108.09	460.389
10.044	287.087	78.0551		2.697	1105.92	459.509
10.137	281.296	77.2606		2.79	1103.82	458.874
10.23	273.559	76.7103		2.883	1093.6	453.558
10.323	271.311	73.4933		2.976	1090.72	452.098
10.416	265.141	74.5038		3.069	1087.38	450.482
10.509	259.156	74.8507		3.162	1083.94	449.074
10.602	257.451	75.2699		3.255	1080.44	446.604
10.695	251.958	75.8211		3.348	1076.57	445.859
10.788	250.307	77.4587		3.441	1072.46	445.007
10.881	241.366	78.9075		3.534	1068.42	444.304
10.974	237.855	77.5341		3.627	1064	443.486
11.067	236.006	77.783		3.72	1059.95	441.797
11.16	233.555	76.2161		3.813	1055.42	441.354
11.253	227.255	75.4499		3.906	1052.82	441.754
11.346	220.956	74.8909		3.999	1047.81	441.054
11.439	214.656	74.5435		4.092	1042.83	440.493
11.532	208.471	74.4377		4.185	1037.87	440.039
11.625	201.996	74.46		4.278	1034.21	440.11
11.718	197.729	72.5499		4.371	1030.09	439.001
11.811	195.12	69.278		4.464	1024.86	436.938
11.904	187.994	68.3748		4.557	1019.8	434.895
11.997	183.218	68.2487		4.65	1014.63	432.888
12.09	177.06	66.2392		4.743	1009.55	431.445
12.183	178.899	65.1439		4.836	1004.67	430.457
12.276	172.815	63.4365		4.929	1000.11	429.603
12.369	166.731	61.9303		5.022	995.619	428.776
12.462	158.117	61.1901		5.115	991.865	425.882
12.555	157.445	56.2399		5.208	987.519	425.437
12.648	144.188	42.8335		5.301	981.348	426.419
				5.394	975.792	425.354
				5.487	970.242	424.497
				5.58	964.76	423.821
				5.673	947.047	408.603
				5.766	937.245	409.099
				5.859	931.099	407.42
				5.952	925.01	406.08
				6.045	918.919	404.901
				6.138	910.551	402.851
				6.231	903.416	404.697
				6.324	898.158	404.973
				6.417	892.948	405.564
				6.51	887.976	406.326
				6.603	882.99	407.409
				6.696	878.237	408.726
				6.789	873.583	409.873
				6.882	868.713	410.994
				6.975	864.864	410.614
				7.068	859.61	410.825
				7.161	851.703	409.594
				7.254	848.739	407.995
				7.347	842.283	406.393
				7.44	835.501	404.829
				7.533	828.801	403.639
				7.626	821.909	402.608
				7.719	814.923	401.747
				7.812	808.205	401.23
				7.905	802.636	400.036
				7.998	799.538	398.966
				8.091	793.874	399.229
				8.184	787.145	399.981
				8.277	780.331	399.729
				8.37	773.633	399.618
				8.463	766.708	398.999
				8.556	759.926	398.509
				8.649	753.215	397.947
				8.742	746.301	397.277
				8.835	739.34	396.677
				8.928	739.732	394.928
				9.021	733.764	394.625
				9.114	730.952	392.964
				9.207	724.997	392.668
				9.3	718.942	392.472
				9.393	713.136	392.772
				9.486	707.256	393.059
				9.579	707.224	391.478
				9.672	701.226	391.907
				9.765	695.217	392.418
				9.858	692.296	392.014
				9.951	684.87	387.799
				10.044	678.36	386.221
				10.137	671.632	384.305
				10.23	665.183	382.465
				10.323	658.386	379.842
				10.416	652.041	378.382
				10.509	645.405	375.915
				10.602	640.384	374.048
				10.695	633.915	371.714
				10.788	627.455	369.359
				10.881	604.958	355.816
				10.974	598.754	353.78
				11.067	592.708	352.093
				11.16	586.463	350.397
				11.253	569.121	318.732
				11.346	562.747	318.393
				11.439	557.64	317.871
				11.532	551.634	316.595
				11.625	545.645	315.366
				11.718	539.535	313.509
				11.811	529.259	308.775
				11.904	523.574	307.942
				11.997	517.99	308.16
				12.09	512.398	307.507
				12.183	509.076	306.741
				12.276	505.428	306.353
				12.369	500.886	306.71
				12.462	495.825	306.322
				12.555	490.622	306.051
				12.648	487.837	306.296
				12.741	482.001	305.88
				12.834	479.549	304.216
				12.927	474.562	302.655
				13.02	469.623	301.129
				13.113	464.542	299.659
				13.206	459.525	298.228
				13.299	454.743	296.661
				13.392	449.883	295.155
				13.485	445.247	293.559
				13.578	440.431	291.469
				13.671	436.859	289.526
				13.764	434.264	286.926
				13.857	429.606	285.009
				13.95	424.899	283.169
				14.043	422.154	281.385
				14.136	417.548	279.623
				14.229	411.937	278.755
				14.322	406.96	277.005
				14.415	405.389	275.528
				14.508	404.436	274.329
				14.601	395.991	272.611
				14.694	392.946	272.842
				14.787	388.471	271.994
				14.88	384.099	271.216
				14.973	379.749	270.509
				15.066	377.803	270.875
				15.159	380.405	271.089
				15.252	376.48	270.352
				15.345	373.554	270.381
				15.438	373.795	268.992
				15.531	362.325	265
				15.624	358.209	263.47
				15.717	355.961	262.375
				15.81	355.253	261.931
				15.903	351.085	260.771
				15.996	346.881	259.706
				16.089	344.191	259.19
				16.182	339.764	258.337
				16.275	337.697	257.437
				16.368	333.629	257.236
				16.461	322.74	253.221
				16.554	320.757	252.806
				16.647	317.418	252.047
				16.74	315.683	252.816
				16.833	312.533	251.825
				16.926	309.326	250.921
				17.019	305.969	251.152
				17.112	302.993	250.41
				17.205	301.694	250.262
				17.298	298.677	249.005
				17.391	290.502	245.791
				17.484	290.961	245.835
				17.577	288.237	244.292
				17.67	286.689	244.005
				17.763	285.538	243.566
				17.856	287.642	244.525
				17.949	290.705	246.69
				18.042	291.732	246.693
				18.135	288.897	245.483
				18.228	296.048	247.993

## Sheet: ΔP=-0.2 M
pil1Δ				pil1Δ
Protoplats				Protoplats
Steady state in 0.4 M				ΔP=-0.2 M
				0 min
N=	95			N=	373
Number of molecules (#)				Number of molecules (#)
time	mean	stdev		time	mean	stdev
-6.975	153.112	62.3733		-12.462	226.43	181.253
-6.882	161.286	59.3712		-12.369	231.79	181.657
-6.789	169.459	56.6787		-12.276	235.971	180.38
-6.696	176.272	53.1081		-12.183	236.215	178.168
-6.603	180.252	49.5979		-12.09	230.974	171.702
-6.51	187.577	49.8915		-11.997	235.259	171.196
-6.417	197.378	50.3695		-11.904	240.373	171.417
-6.324	204.431	52.1317		-11.811	245.927	170.676
-6.231	214.405	53.4008		-11.718	252.788	170.977
-6.138	221.837	54.1405		-11.625	251.251	169.514
-6.045	225.406	59.2723		-11.532	259.318	172.843
-5.952	237.166	59.9645		-11.439	267.368	172.725
-5.859	243.535	63.5345		-11.346	274.318	172.572
-5.766	247.818	67.146		-11.253	280.804	171.753
-5.673	255.17	70.3142		-11.16	281.156	170.388
-5.58	267.16	70.5271		-11.067	285.371	168.755
-5.487	285.492	115.33		-10.974	293.867	168.967
-5.394	297.242	110.821		-10.881	301.33	169.315
-5.301	309.007	108.122		-10.788	307.793	169.701
-5.208	319.49	105.019		-10.695	310.139	170.488
-5.115	326.374	103.941		-10.602	323.572	174.645
-5.022	330.015	106.76		-10.509	332.891	175.176
-4.929	336.026	106.951		-10.416	339.956	175.385
-4.836	342.999	105.281		-10.323	343.96	176.455
-4.743	351.968	101.782		-10.23	344.272	178.183
-4.65	362.356	100.557		-10.137	353.537	178.306
-4.557	383.651	110.585		-10.044	362.459	178.953
-4.464	398.632	109.871		-9.951	369.995	180.251
-4.371	410.779	110.407		-9.858	381.138	181.287
-4.278	424.956	109.452		-9.765	381.607	185.2
-4.185	446.268	118.866		-9.672	388.419	185.987
-4.092	462.449	118.024		-9.579	398.721	187.166
-3.999	479.932	120.15		-9.486	408.959	188.39
-3.906	494.893	121.419		-9.393	417.93	190.362
-3.813	505.679	122.82		-9.3	422.13	193.234
-3.72	521.667	123.374		-9.207	433.131	194.196
-3.627	537.003	125.788		-9.114	443.947	195.727
-3.534	551.689	128.156		-9.021	453.423	198.041
-3.441	566.471	131.015		-8.928	463.797	199.538
-3.348	582	133.345		-8.835	469.794	202.165
-3.255	597.266	136.793		-8.742	482.971	204.017
-3.162	613.818	140.735		-8.649	491.873	205.357
-3.069	634.359	144.812		-8.556	501.788	206.585
-2.976	650.668	149.317		-8.463	510.857	207.874
-2.883	666.612	154.034		-8.37	517.705	210.286
-2.79	682.396	158.848		-8.277	529.525	210.995
-2.697	698.138	164.024		-8.184	539.744	211.302
-2.604	714.414	169.496		-8.091	550.791	211.677
-2.511	730.751	175.247		-7.998	561.573	212.537
-2.418	746.56	181.027		-7.905	569.476	214.551
-2.325	761.814	186.88		-7.812	579.358	215.173
-2.232	775.626	189.322		-7.719	590.553	216.766
-2.139	788.956	191.222		-7.626	601.841	218.354
-2.046	801.953	193.123		-7.533	611.6	221.225
-1.953	814.529	195.197		-7.44	622.965	222.791
-1.86	824.769	195.517		-7.347	634.949	224.16
-1.767	835.678	197.094		-7.254	644.653	228.116
-1.674	846.049	198.79		-7.161	654.604	231.591
-1.581	856.16	200.895		-7.068	666.451	233.579
-1.488	866.017	203.123		-6.975	678.607	235.292
-1.395	875.42	205.635		-6.882	692.629	239.522
-1.302	884.033	207.304		-6.789	704.804	240.409
-1.209	889.859	207.574		-6.696	716.832	241.401
-1.116	896.621	209.449		-6.603	728.272	241.981
-1.023	902.04	210.22		-6.51	739.4	242.356
-0.93	906.084	211.084		-6.417	750.523	242.362
-0.837	904.818	211.496		-6.324	755.356	250.843
-0.744	908.696	212.788		-6.231	767.347	251.76
-0.651	912.554	214.371		-6.138	779.303	252.733
-0.558	916.518	216.054		-6.045	790.13	252.905
-0.465	920.22	216.486		-5.952	801.839	253.584
-0.372	922.901	215.974		-5.859	813.125	255.153
-0.279	925.135	215.138		-5.766	824.372	256.832
-0.186	926.729	212.874		-5.673	836.913	259.006
-0.093	928.196	210.298		-5.58	846.428	261.286
0	928.589	208.324		-5.487	857.91	262.686
0.093	924.003	209.757		-5.394	867.119	267.491
0.186	923.47	207.645		-5.301	878.056	268.797
0.279	922.513	202.944		-5.208	890.122	270.28
0.372	922.726	200.093		-5.115	901.571	271.648
0.465	922.755	197.633		-5.022	912.355	273.222
0.558	916.045	213.409		-4.929	922.976	274.354
0.651	913.676	210.498		-4.836	933.662	275.879
0.744	910.58	207.85		-4.743	944.154	277.141
0.837	907.625	205.134		-4.65	954.287	277.575
0.93	900.89	201.274		-4.557	964.868	279.07
1.023	897.904	199.893		-4.464	979.433	289.69
1.116	895.15	198.685		-4.371	989.98	291.564
1.209	892.19	197.827		-4.278	1000.4	293.533
1.302	889.25	197.238		-4.185	1012.11	294.95
1.395	884.035	196.837		-4.092	1023.1	296.687
1.488	882.341	197.258		-3.999	1028.27	305.362
1.581	876.559	193.669		-3.906	1038.9	306.817
1.674	873.703	193.951		-3.813	1049.91	308.83
1.767	868.266	195.72		-3.72	1060.85	311.188
1.86	863.887	196.969		-3.627	1071.78	313.919
1.953	859.622	194.978		-3.534	1080.11	321.222
2.046	854.774	193.073		-3.441	1091.57	324.925
2.139	850.146	191.313		-3.348	1101.95	330.316
2.232	845.491	189.798		-3.255	1113.49	334.569
2.325	840.814	188.699		-3.162	1123.94	339.043
2.418	838.428	183.04		-3.069	1134.94	343.733
2.511	834.143	181.279		-2.976	1145.81	348.694
2.604	829.011	179.026		-2.883	1156.29	353.669
2.697	822.568	177.739		-2.79	1166.67	358.523
2.79	814.978	176.018		-2.697	1183.22	360.127
2.883	810.664	175.883		-2.604	1190.78	364.56
2.976	805.897	174.704		-2.511	1199.47	368.293
3.069	799.907	172.772		-2.418	1208.49	372.428
3.162	794.843	171.93		-2.325	1218.38	376.341
3.255	789.037	171.128		-2.232	1224.8	380.432
3.348	780.674	171.635		-2.139	1237.63	386.559
3.441	773.948	170.63		-2.046	1246.62	389.623
3.534	767.375	169.754		-1.953	1255.61	392.652
3.627	760.47	167.965		-1.86	1264.32	395.773
3.72	752.956	164.442		-1.767	1270.29	398.713
3.813	744.804	162.29		-1.674	1275.89	400.99
3.906	736.69	160.581		-1.581	1283.1	403.481
3.999	728.644	159.156		-1.488	1290.33	405.487
4.092	720.826	158.026		-1.395	1297.27	407.367
4.185	713.598	157.07		-1.302	1305.29	409.877
4.278	704.479	155.968		-1.209	1311.04	411.414
4.371	697.593	153.988		-1.116	1317.72	412.998
4.464	690.89	152.075		-1.023	1324.14	414.3
4.557	684.144	150.297		-0.93	1330.26	416.281
4.65	670.672	139.151		-0.837	1334	417.356
4.743	663.73	137.406		-0.744	1339.59	419.381
4.836	656.915	136.004		-0.651	1344.53	421.273
4.929	649.859	134.843		-0.558	1349.46	423.441
5.022	639.299	131.653		-0.465	1354.78	425.231
5.115	632.015	130.556		-0.372	1358.94	427.426
5.208	622.866	130.476		-0.279	1361.77	428.888
5.301	615.097	130.749		-0.186	1364.25	431.286
5.394	608.492	130.54		-0.093	1366.81	432.912
5.487	600.538	130.952		0	1369.87	434.388
5.58	586.478	113.809		0.093	1368.72	434.232
5.673	578.741	113.046		0.186	1362.45	440.483
5.766	570.854	113.437		0.279	1363.23	440.377
5.859	563.546	114.05		0.372	1363.89	440.152
5.952	555.561	113.977		0.465	1364.99	439.295
6.045	547.266	114.05		0.558	1360.84	439.322
6.138	535.866	112.006		0.651	1361.99	439.78
6.231	528.263	111.295		0.744	1361.15	439.938
6.324	520.743	110.909		0.837	1360.81	439.506
6.417	514.012	110.28		0.93	1360.45	439.755
6.51	507.216	110.182		1.023	1360.77	435.676
6.603	500.468	110.595		1.116	1350.47	441.114
6.696	493.766	111.269		1.209	1349.75	440.974
6.789	487.064	112.185		1.302	1348.97	441.19
6.882	480.852	113.251		1.395	1349.17	441.116
6.975	478.042	113.276		1.488	1350.19	440.986
7.068	468.717	114.646		1.581	1348.93	441.308
7.161	462.545	114.411		1.674	1346.86	440.914
7.254	453.904	113.79		1.767	1344.47	440.357
7.347	446.039	114.027		1.86	1341.98	439.884
7.44	439.374	113.084		1.953	1339.21	439.182
7.533	437.64	110.816		2.046	1309.59	463.666
7.626	430.985	109.654		2.139	1303.91	460.854
7.719	424.331	108.743		2.232	1300.23	459.07
7.812	417.259	107.901		2.325	1296.73	456.558
7.905	410.338	107.229		2.418	1290.69	454.516
7.998	410.858	101.381		2.511	1285.56	450.476
8.091	403.943	100.212		2.604	1279.75	446.861
8.184	394.735	98.6782		2.697	1273.38	444.033
8.277	389.194	98.5424		2.79	1270.32	439.767
8.37	382.555	98.0656		2.883	1264.77	436.723
8.463	375.679	98.9526		2.976	1247.81	441.593
8.556	369.136	99.078		3.069	1244.09	439.005
8.649	362.594	99.4145		3.162	1240.61	436.393
8.742	356.176	99.933		3.255	1234.43	434.056
8.835	349.488	100.517		3.348	1228.86	431.595
8.928	342.861	101.144		3.441	1213.85	435.559
9.021	336.063	100.812		3.534	1208.6	433.101
9.114	328.995	100.661		3.627	1203.53	430.985
9.207	325.031	99.1052		3.72	1201.26	427.223
9.3	327.441	89.612		3.813	1195.03	424.313
9.393	324.124	85.6882		3.906	1188.63	421.473
9.486	317.279	85.2361		3.999	1176.49	421.016
9.579	310.433	85.1085		4.092	1169.79	418.364
9.672	303.601	85.3006		4.185	1164.12	415.856
9.765	303.089	81.8346		4.278	1155.34	412.616
9.858	298.181	79.3689		4.371	1152.22	407.753
9.951	292.428	78.6739		4.464	1143.35	404.905
10.044	287.087	78.0551		4.557	1137.7	402.53
10.137	281.296	77.2606		4.65	1132.11	398.262
10.23	273.559	76.7103		4.743	1126.77	395.77
10.323	271.311	73.4933		4.836	1119.82	393.271
10.416	265.141	74.5038		4.929	1097.35	404.48
10.509	259.156	74.8507		5.022	1089.77	400.835
10.602	257.451	75.2699		5.115	1082.72	397.141
10.695	251.958	75.8211		5.208	1076.66	394.318
10.788	250.307	77.4587		5.301	1063.43	396.792
10.881	241.366	78.9075		5.394	1055.95	393.352
10.974	237.855	77.5341		5.487	1048.4	390.36
11.067	236.006	77.783		5.58	1040.81	387.291
11.16	233.555	76.2161		5.673	1032.74	384.446
11.253	227.255	75.4499		5.766	1013.59	391.671
11.346	220.956	74.8909		5.859	1007.73	388.907
11.439	214.656	74.5435		5.952	1000.33	386.176
11.532	208.471	74.4377		6.045	993.094	383.143
11.625	201.996	74.46		6.138	985.025	369.39
11.718	197.729	72.5499		6.231	976.64	368.015
11.811	195.12	69.278		6.324	969.524	365.77
11.904	187.994	68.3748		6.417	962.359	363.5
11.997	183.218	68.2487		6.51	955.739	361.125
12.09	177.06	66.2392		6.603	952.903	354.245
12.183	178.899	65.1439		6.696	941.677	354.717
12.276	172.815	63.4365		6.789	935.809	352.387
12.369	166.731	61.9303		6.882	928.477	350.775
12.462	158.117	61.1901		6.975	920.878	348.536
12.555	157.445	56.2399		7.068	914.619	347.735
12.648	144.188	42.8335		7.161	902.104	339.446
				7.254	893.455	337.995
				7.347	884.777	336.796
				7.44	876.135	335.891
				7.533	870.7	333.037
				7.626	859.345	333.813
				7.719	850.011	332.34
				7.812	841.723	331.056
				7.905	832.048	329.197
				7.998	826.351	325.787
				8.091	819.369	324.793
				8.184	810.505	323.269
				8.277	801.861	322.339
				8.37	793.365	322.169
				8.463	785.141	321.916
				8.556	778.358	321.708
				8.649	771.56	321.38
				8.742	763.351	321.579
				8.835	755.447	321.499
				8.928	754.501	316.938
				9.021	749.099	317.655
				9.114	740.971	318.682
				9.207	731.242	320.397
				9.3	723.532	320.812
				9.393	725.644	315.698
				9.486	718.063	317.256
				9.579	711.827	317.32
				9.672	704.617	318.406
				9.765	696.816	319.489
				9.858	692.12	319.75
				9.951	690.462	318.485
				10.044	684.938	317.502
				10.137	677.727	318.556
				10.23	671.588	318.16
				10.323	673.944	313.196
				10.416	666.081	313.35
				10.509	658.045	313.327
				10.602	650.164	313.501
				10.695	642.048	313.773
				10.788	637.993	312.118
				10.881	632.744	312.827
				10.974	624.956	312.987
				11.067	617.134	313.171
				11.16	610.658	313.968
				11.253	614.265	310.54
				11.346	607.401	311.082
				11.439	601.302	310.581
				11.532	595.571	309.557
				11.625	587.871	310.209
				11.718	592.297	304.969
				11.811	588.748	303.106
				11.904	580.444	301.965
				11.997	572.171	300.594
				12.09	565.547	298.65
				12.183	575.625	290.505
				12.276	567.061	289.116
				12.369	558.418	288.347
				12.462	550.053	287.017
				12.555	543.597	284.924
				12.648	540.553	282.031
				12.741	531.572	279.652
				12.834	524.176	279.203
				12.927	516.645	278.689
				13.02	509.275	278.27
				13.113	509.343	275.447
				13.206	502.917	276.442
				13.299	495.445	275.665
				13.392	489.837	274.381
				13.485	484.043	273.048
				13.578	484.321	271.144
				13.671	479.566	267.473
				13.764	472.241	265.769
				13.857	464.905	263.988
				13.95	457.624	262.161
				14.043	461.468	257.085
				14.136	455.852	254.851
				14.229	450.563	252.635
				14.322	445.323	250.309
				14.415	438.416	248.498
				14.508	438.499	245.173
				14.601	431.914	240.416
				14.694	425.074	238.937
				14.787	418.484	237.732
				14.88	414.342	236.982
				14.973	412.624	235.196
				15.066	407.676	234.885
				15.159	401.472	233.977
				15.252	395.401	233.091
				15.345	392.565	232.125
				15.438	390.014	230.925
				15.531	386.416	230.402
				15.624	380.903	229.18
				15.717	375.2	227.898
				15.81	374.368	226.243
				15.903	368.924	225.075
				15.996	371.111	223.48
				16.089	365.038	221.979
				16.182	359.911	221.007
				16.275	353.756	219.527
				16.368	349.175	218.073
				16.461	346.771	216.366
				16.554	340.581	215.93
				16.647	333.893	214.751
				16.74	329.474	213.653
				16.833	325.193	212.516
				16.926	322.448	211.545
				17.019	319.177	212.905
				17.112	315.538	212.016
				17.205	310.624	211.085
				17.298	310.285	210.434
				17.391	311.507	210.156
				17.484	311.332	209.493
				17.577	306.141	208.008
				17.67	302.457	206.551
				17.763	298.871	205.056
				17.856	294.24	205.061
				17.949	291.837	206.075
				18.042	286.966	204.346
				18.135	282.079	202.648
				18.228	277.166	200.953
				18.321	268.483	178.495
				18.414	267.412	178.988
				18.507	262.827	177.933
				18.6	258.45	177.038
				18.693	257.426	176.304
				18.786	255.109	176.67
				18.879	257.615	177.838
				18.972	253.468	176.944
				19.065	249.358	175.941
				19.158	250.496	175.315
				19.251	236.905	161.319
				19.344	234.696	160.837
				19.437	231.449	159.944
				19.53	228.19	159.548
				19.623	224.931	159.24
				19.716	225.461	160.491
				19.809	252.625	178.393
				19.902	253.161	177.945
				19.995	253.178	178.246
				20.088	250.766	178.19

## Sheet: ANOVA (ΔP=-0.05 M) 
One -way ANOVA at time 0s
Significance level	α =	0.05
	mean	stdev	N
Steady-state 0.4 M	960.029	258.573	429
0 min after ΔP=-0.05 M	1115.83	279.688	183
10 min after ΔP=-0.05 M	1009.26	223.769	206
						ANOVA between steady-state and 0 min after shock	ANOVA between 0 min and 10 min after shock	ANOVA between steady-state and 10 min after shock
Overall mean	m=	1007.28				1006.62	1059.4	976.001
Between-group degrees of freedom	dfb=	2				1	1	1
Between-group mean square value	MSb=	1.5575e+06				3.11392e+06	1.1006e+06	337349
Within-group degrees of freedom	dfw=	815				610	387	633
Within-group mean square value	MSw=	65175.4				70250.9	63312.4	61423.3
F-ratio	F=	23.8971				44.3257	17.3837	5.4922
Critical value	Fcrit=	3.00677				3.85675	3.8656	3.85619
p-value	p=	8.21383e-11				6.20619e-11	3.77223e-05	0.01941
There is a statistically significant difference between conditions						The difference between steady-state and 0 min after shock is statistically significant	The difference between 0 min and 10 min after shock is statistically significant	The difference between steady-state and 10 min after shock is statistically significant

## Sheet: ANOVA (ΔP=-0.1 M)
One -way ANOVA at time 0s
Significance level	α =	0.05
	mean	stdev	N
Steady-state 0.4 M	928.589	208.324	95
0 min after ΔP=-0.1 M	1154.95	466.956	215
Overall mean	m=	1085.58
Between-group degrees of freedom	dfb=	1
Between-group mean square value	MSb=	3.37601e+06
Within-group degrees of freedom	dfw=	308
Within-group mean square value	MSw=	164746
F-ratio	F=	20.4923
Critical value	Fcrit=	3.87183
p-value	p=	8.56527e-06
The difference between protoplast steady-state and 0 min after shock is statistically significant

## Sheet: ANOVA (ΔP=-0.2 M)
One -way ANOVA at time 0s
Significance level	α =	0.05
	mean	stdev	N
Steady-state 0.4 M	928.589	208.324	95
0 min after ΔP=-0.2 M	1369.87	434.388	373
10 min after ΔP=-0.2 M
Overall mean	m=	1280.29
Between-group degrees of freedom	dfb=	1
Between-group mean square value	MSb=	1.47439e+07
Within-group degrees of freedom	dfw=	466
Within-group mean square value	MSw=	159385
F-ratio	F=	92.5054
Critical value	Fcrit=	3.86149
p-value	p=	0
The difference between protoplast steady-state and 0 min after shock is statistically significant
