# Supplementary material for: Rapid adaptation of endocytosis, exocytosis, and eisosomes after an acute increase in membrane tension in yeast cells
Source: eLife. 2021 May 13;10:e62084. doi: 10.7554/eLife.62084 (PMC9045820; doi:10.7554/eLife.62084)
Supplement: Figure 7—source data 4. [file elife-62084-fig7-data4.xlsx]

## Sheet: Peak number of molecules
pil1Δ
Protoplats
ΔP=-0.05 M
	Peak number of molecule (#)	CI 95%	SD	N
Steady state in 0.4M	960.029	22.6006	238.161	429
0 min after ΔP=-0.05 M	1115.83	35.2692	241.811	183
2 min after ΔP=-0.05 M	1063.91	38.4771	267.432	188
4 min after ΔP=-0.05 M	1049.22	30.6513	197.552	162
6 min after ΔP=-0.05 M	1009.26	28.3851	199.928	193
8 min after ΔP=-0.05 M	1029.12	36.1314	257.146	197
10 min after ΔP=-0.05 M	979.03	26.4177	192.313	206

## Sheet: ANOVA
One -way ANOVA
Significance level	α =	0.05
	mean	stdev	N
Steady state in 0.4M	960.029	238.161	429
0 min after ΔP=-0.05 M	1115.83	241.811	183
2 min after ΔP=-0.05 M	1063.91	267.432	188
4 min after ΔP=-0.05 M	1049.22	197.552	162
6 min after ΔP=-0.05 M	1009.26	199.928	193
8 min after ΔP=-0.05 M	1029.12	257.146	197
10 min after ΔP=-0.05 M	979.03	192.313	206
						ANOVA between steady-state and 0 min after shock	ANOVA between steady-state and 2 min after shock	ANOVA between steady-state and 4 min after shock	ANOVA between steady-state and 6 min after shock	ANOVA between steady-state and 8 min after shock	ANOVA between steady-state and 10 min after shock
Overall mean	m=	1017.48				1006.62	991.68	984.477	975.306	981.771	966.193
Between-group degrees of freedom	dfb=	6				1	1	1	1	1	1
Between-group mean square value	MSb=	683131				3.11391e+06	1.41047e+06	935454	322666	644398	50247.9
Within-group degrees of freedom	dfw=	1551				610	615	589	620	624	633
Within-group mean square value	MSw=	53380.1				57243.4	61220.6	51884.2	51533.8	59674.3	50328.9
F-ratio	F=	12.7975				54.3978	23.0392	18.0297	6.26125	10.7986	0.99839
Critical value	Fcrit=	2.10442				3.85675	3.85662	3.8573	3.8565	3.8564	3.85619
p-value	p=	3.76366e-14				5.36904e-13	1.99504e-06	2.5269e-05	0.0125971	0.00107271	0.318082
There is a statistically significant difference between all conditions						The difference between steady-state and 0 min after shock is statistically significant	The difference between steady-state and 2 min after shock is statistically significant	The difference between steady-state and 4 min after shock is statistically significant	The difference between steady-state and 6 min after shock is statistically significant	The difference between steady-state and 8 min after shock is statistically significant	The difference between steady-state and 10 min after shock is not statistically significant
