# Supplementary material for: Rapid adaptation of endocytosis, exocytosis, and eisosomes after an acute increase in membrane tension in yeast cells
Source: eLife. 2021 May 13;10:e62084. doi: 10.7554/eLife.62084 (PMC9045820; doi:10.7554/eLife.62084)
Supplement: Figure 7—source data 5. [file elife-62084-fig7-data5.xlsx]

## Sheet: # molecules
WT				WT
Protoplats				Protoplats
Steady state in 0.25 M				ΔP=-0.1 M
				0 min
N=	226			N=	75
Number of molecules (#)				Number of molecules (#)
time	mean	stdev		time	mean	stdev
-5.766	149.896	110.092		-16.647	150.135	116.833
-5.673	164.439	105.988		-16.554	155.044	114.894
-5.58	171.442	99.6322		-16.461	159.952	113.102
-5.487	180.826	98.891		-16.368	164.968	111.475
-5.394	195.645	100.949		-16.275	169.984	110.01
-5.301	206.517	100.397		-16.182	174.8	108.421
-5.208	218.335	101.835		-16.089	179.617	106.996
-5.115	234.271	114.222		-15.996	179.157	104.403
-5.022	238.171	114.024		-15.903	183.929	103.412
-4.929	248.102	114.666		-15.81	182.839	102.258
-4.836	254.71	116.611		-15.717	187.827	101.472
-4.743	269.789	114.073		-15.624	192.664	101.87
-4.65	285.144	114.754		-15.531	197.501	102.475
-4.557	298.902	115.959		-15.438	202.86	103.583
-4.464	317.553	117.69		-15.345	208.22	104.925
-4.371	339.703	127.37		-15.252	206.394	108.724
-4.278	363.671	134.162		-15.159	212.208	110.925
-4.185	379.271	138.349		-15.066	218.022	113.313
-4.092	393.746	142.549		-14.973	239.669	131.08
-3.999	414.839	144.565		-14.88	245.074	132.319
-3.906	435.852	147.04		-14.787	250.273	133.914
-3.813	459.223	148.816		-14.694	251.362	133.188
-3.72	482.934	151.216		-14.601	258.198	133.763
-3.627	507.396	153.301		-14.508	256.957	135.997
-3.534	531.897	155.774		-14.415	263.747	136.864
-3.441	554.391	159.086		-14.322	270.199	137.436
-3.348	576.082	163.866		-14.229	269.137	139.445
-3.255	599.706	168.226		-14.136	272.391	134.49
-3.162	625.05	171.97		-14.043	279.793	135.046
-3.069	650.266	176.15		-13.95	264.813	144.286
-2.976	675.62	180.711		-13.857	273.115	145.71
-2.883	701.29	184.989		-13.764	283.54	147.845
-2.79	727.224	189.756		-13.671	294.51	150.44
-2.697	752.979	194.831		-13.578	292.135	156.506
-2.604	778.652	199.858		-13.485	303.247	159.755
-2.511	804.305	204.486		-13.392	314.776	163.904
-2.418	829.19	209.668		-13.299	321.749	167.266
-2.325	856.92	216.057		-13.206	327.946	171.69
-2.232	882.949	222.366		-13.113	331.978	180.083
-2.139	910.224	228.458		-13.02	345.058	185.101
-2.046	935.252	234.55		-12.927	358.513	189.719
-1.953	959.273	239.434		-12.834	356.343	195.793
-1.86	982.239	243.836		-12.741	356.491	199.61
-1.767	1004.37	248.512		-12.648	368.947	201.727
-1.674	1025.85	253.814		-12.555	381.902	203.609
-1.581	1046.8	259.732		-12.462	388.55	206.295
-1.488	1066.43	265.491		-12.369	400.55	205.313
-1.395	1085.47	271.72		-12.276	415.311	207.247
-1.302	1103.35	277.957		-12.183	429.613	209.078
-1.209	1119.6	284.743		-12.09	443.871	210.398
-1.116	1131.29	295.169		-11.997	474.276	247.993
-1.023	1143.3	302.34		-11.904	482.474	248.038
-0.93	1154.71	309.04		-11.811	496.751	247.948
-0.837	1165.1	316.351		-11.718	511.305	248.313
-0.744	1174.62	323.999		-11.625	526.03	248.941
-0.651	1186.22	332.313		-11.532	540.722	249.895
-0.558	1194.64	339.44		-11.439	555.507	251.201
-0.465	1202.53	348.394		-11.346	568.827	251.288
-0.372	1210.97	356.119		-11.253	582.581	251.588
-0.279	1216.55	363.114		-11.16	596.064	252.219
-0.186	1211.61	378.001		-11.067	609.74	253.07
-0.093	1219.71	382.95		-10.974	624.672	254.959
0	1223.65	387.378		-10.881	639.62	256.195
0.093	1215.56	383.036		-10.788	655.146	257.19
0.186	1216.62	384.815		-10.695	658.905	266.197
0.279	1218.72	387.081		-10.602	666.757	268.932
0.372	1220.15	389.032		-10.509	681.89	269.868
0.465	1221.31	390.974		-10.416	697.726	271.519
0.558	1211.58	391.226		-10.323	713.945	272.758
0.651	1212.1	393.18		-10.23	730.431	274.227
0.744	1204.68	399.097		-10.137	746.949	275.784
0.837	1210.12	402.371		-10.044	763.13	275.91
0.93	1206.9	402.027		-9.951	779.874	276.09
1.023	1205.67	403.332		-9.858	789.542	276.576
1.116	1202.06	404.298		-9.765	805.693	276.58
1.209	1198.61	405.858		-9.672	806.195	292.389
1.302	1191.22	404.486		-9.579	822.051	292.896
1.395	1186.05	405.343		-9.486	835.68	290.819
1.488	1179.7	405.967		-9.393	847.654	286.462
1.581	1176.12	406.506		-9.3	861.211	285.581
1.674	1152.95	420.395		-9.207	874.701	284.8
1.767	1148.23	418.201		-9.114	887.466	282.377
1.86	1147.6	416.292		-9.021	900.992	283.193
1.953	1138.95	414.478		-8.928	913.897	284.102
2.046	1132.91	412.257		-8.835	927.266	285.313
2.139	1126.58	410.12		-8.742	940.869	287.343
2.232	1120.94	406.708		-8.649	954.905	289.19
2.325	1114.56	404.36		-8.556	968.833	291.147
2.418	1108.2	402.075		-8.463	982.979	293.24
2.511	1101.37	399.894		-8.37	997.198	295.628
2.604	1086.5	403.431		-8.277	1011.35	298.485
2.697	1093.69	398.764		-8.184	1025.5	300.817
2.79	1096.59	398.335		-8.091	1040.32	304.07
2.883	1088.79	397.052		-7.998	1055.76	307.568
2.976	1080.52	395.105		-7.905	1071.17	315.118
3.069	1073.33	394.623		-7.812	1086.78	319.55
3.162	1066.01	394.464		-7.719	1112.15	320.358
3.255	1061.65	393.359		-7.626	1127.64	324.82
3.348	1053.72	393.304		-7.533	1142.75	328.993
3.441	1045.57	393.598		-7.44	1156.68	333.159
3.534	1036.87	398.675		-7.347	1170.75	337.975
3.627	1028.26	393.013		-7.254	1188	346.714
3.72	1021.18	389.419		-7.161	1201.36	349.976
3.813	1012.96	386.748		-7.068	1214.29	353.846
3.906	1002.89	383.347		-6.975	1226.58	357.99
3.999	992.375	379.781		-6.882	1238.79	362.374
4.092	982.365	378.52		-6.789	1250.8	367.202
4.185	972.133	374.668		-6.696	1262.82	371.778
4.278	952.4	375.412		-6.603	1275.85	377.073
4.371	943.419	374.707		-6.51	1288.84	381.945
4.464	933.137	369.313		-6.417	1301.88	387.064
4.557	920.282	369.157		-6.324	1315.33	391.078
4.65	910.207	366.601		-6.231	1327.86	392.874
4.743	900.059	364.365		-6.138	1339.33	395.014
4.836	888.927	361.038		-6.045	1350.39	397.178
4.929	879.438	359.177		-5.952	1361.54	400.033
5.022	863.746	348.674		-5.859	1372.75	403.322
5.115	852.87	348.191		-5.766	1384.73	406.498
5.208	838.646	349.897		-5.673	1396.33	410.07
5.301	828.664	350.832		-5.58	1408.2	413.789
5.394	817.927	349.473		-5.487	1420.05	418.504
5.487	819.408	345.971		-5.394	1432.55	424.488
5.58	810.868	343.166		-5.301	1445.09	432.725
5.673	802.429	340.499		-5.208	1473.36	436.609
5.766	795.351	339.026		-5.115	1488.49	444.313
5.859	786.962	336.749		-5.022	1503.52	452.245
5.952	777.123	336.526		-4.929	1550.97	446.487
6.045	772.692	332.705		-4.836	1567.15	453.798
6.138	759.311	334.2		-4.743	1583.26	460.877
6.231	753.633	332.118		-4.65	1609	469.87
6.324	745.459	330.057		-4.557	1588.35	525.86
6.417	740.475	325.523		-4.464	1601.94	528.365
6.51	732.327	320.241		-4.371	1620.28	535.415
6.603	724.026	315.254		-4.278	1632.21	536.17
6.696	717.077	311.48		-4.185	1644.92	536.808
6.789	708.558	307.024		-4.092	1657.56	537.777
6.882	701.636	305.147		-3.999	1669.9	539.264
6.975	693.074	301.638		-3.906	1681.74	541.518
7.068	684.497	298.174		-3.813	1694.07	544.081
7.161	675.445	295.047		-3.72	1706.35	546.958
7.254	665.688	291.103		-3.627	1718.67	550.004
7.347	654.379	284.752		-3.534	1777.38	550.945
7.44	644.526	281.527		-3.441	1793.01	555.806
7.533	637.305	278.215		-3.348	1807.89	559.896
7.626	627.416	275.16		-3.255	1821.9	572.14
7.719	617.654	273.401		-3.162	1838.12	576.86
7.812	607.468	269.986		-3.069	1854.46	582.007
7.905	600.258	265.717		-2.976	1894.65	571.529
7.998	590.095	262.59		-2.883	1910.03	575.896
8.091	582.922	260.775		-2.79	1926.35	580.392
8.184	572.312	257.875		-2.697	1941.58	585.045
8.277	555.079	248.911		-2.604	1953.5	585.487
8.37	542.466	247.769		-2.511	1965.5	587.706
8.463	533.709	248.408		-2.418	1978.12	590.213
8.556	525.233	249.898		-2.325	1993.56	598.373
8.649	519.615	248.637		-2.232	2002.53	598.112
8.742	518.15	247.964		-2.139	2009.92	598.538
8.835	510.44	249.206		-2.046	2017.31	599.297
8.928	505.198	250.937		-1.953	2038.55	596.835
9.021	497.838	252.086		-1.86	2044.83	597.765
9.114	488.348	252.913		-1.767	2016.86	621.629
9.207	481.361	251		-1.674	2036.51	636.759
9.3	472.279	250.241		-1.581	2040.24	635.913
9.393	464.728	250.327		-1.488	2043.35	635.248
9.486	464.076	251.986		-1.395	2046.88	635.226
9.579	456.34	252.436		-1.302	2050.04	635.659
9.672	454.398	254.454		-1.209	2053.12	635.517
9.765	446.52	254.787		-1.116	2056.2	635.745
9.858	443.115	256.82		-1.023	2060.61	638.34
9.951	441.17	259.46		-0.93	2066.73	641.263
10.044	432.951	259.322		-0.837	2073.8	644.481
10.137	428.529	255.054		-0.744	2079.36	646.936
10.23	423.213	249.638		-0.651	2084.65	650.913
10.323	417.966	244.199		-0.558	2090.12	655.565
10.416	409.28	238.844		-0.465	2095.32	660.551
10.509	400.625	233.774		-0.372	2099.98	665.981
10.602	394.137	231.904		-0.279	2105.21	671.989
10.695	384.492	228.75		-0.186	2110.43	678.468
10.788	375.974	224.2		-0.093	2112.91	680.402
10.881	382.717	218.594		0	2114.3	682.429
10.974	374.764	214.967		0.093	2092.23	688.523
11.067	382.035	216.969		0.186	2094.07	689.405
11.16	374.942	217.115		0.279	2082.74	693.253
11.253	370.87	218.101		0.372	2082.57	691.462
11.346	361.847	215.278		0.465	2082.41	689.973
11.439	354.828	216.046		0.558	2082.73	688.618
11.532	369.042	216.389		0.651	2082.64	688.294
11.625	362.715	216.977		0.744	2082.56	688.286
11.718	360.911	217.764		0.837	2082.67	689.297
11.811	359.254	224.324		0.93	2083.43	690.604
11.904	351.605	223.548		1.023	2083.45	692.152
11.997	349.024	220.608		1.116	2092.44	701.895
12.09	341.473	217.837		1.209	2090.12	707.518
12.183	333.922	215.22		1.302	2088.28	713.235
12.276	326.471	212.656		1.395	2086.69	719.289
12.369	318.859	209.923		1.488	2085.41	725.232
12.462	321.816	210.704		1.581	2081.62	731.122
12.555	334.501	207.776		1.674	2000.24	596.16
12.648	326.581	205.37		1.767	1993.61	596.347
12.741	312.986	202.686		1.86	1985.38	596.256
12.834	305.252	200.282		1.953	1927.06	654.024
12.927	271.057	162.333		2.046	1920.75	653.138
13.02	277.994	159.707		2.139	1914.25	649.575
13.113	270.614	156.857		2.232	1912.15	655.144
13.206	269.613	152.719		2.325	1905.19	651.641
13.299	275.36	147.701		2.418	1897.85	648.557
13.392	268.202	145.742		2.511	1892.67	644.267
13.485	261.044	144.07		2.604	1887.5	640.212
13.578	253.886	142.696		2.697	1880.81	634.704
13.671	231.483	134.604		2.79	1874.27	629.513
13.764	218.905	133.852		2.883	1866.47	623.954
				2.976	1858.13	619.521
				3.069	1849.85	617.462
				3.162	1841.19	616.114
				3.255	1832.77	615.209
				3.348	1823.65	614.826
				3.441	1813.59	615.469
				3.534	1769.07	634.131
				3.627	1760.68	634.571
				3.72	1752.82	634.694
				3.813	1746.72	634.855
				3.906	1739.42	633.962
				3.999	1732.41	632.144
				4.092	1725.22	629.765
				4.185	1717.26	627.327
				4.278	1710.57	624.767
				4.371	1712.85	629.415
				4.464	1707.26	626.946
				4.557	1701.76	626.146
				4.65	1680.37	627.199
				4.743	1673.73	625.612
				4.836	1666.95	622.572
				4.929	1658.9	620.806
				5.022	1650.52	618.912
				5.115	1642.9	617.332
				5.208	1634.19	616.213
				5.301	1625.89	614.945
				5.394	1617.57	613.589
				5.487	1560.4	556.312
				5.58	1555.81	561.015
				5.673	1568.64	550.603
				5.766	1556.64	547.052
				5.859	1562.77	538.894
				5.952	1550.56	530.767
				6.045	1538.01	522.846
				6.138	1525.86	514.822
				6.231	1512.87	507.638
				6.324	1499.24	500.628
				6.417	1487.2	494.822
				6.51	1306.33	606.991
				6.603	1297.71	588.581
				6.696	1250.07	556.647
				6.789	1246.97	548.428
				6.882	1243.49	540.654
				6.975	1239.84	533.258
				7.068	1235.72	526.463
				7.161	1232.68	519.406
				7.254	1230.55	512.864
				7.347	1227.94	506.29
				7.44	1203.67	522.09
				7.533	1201.08	504.067
				7.626	1196.48	493.735
				7.719	1191.88	483.986
				7.812	1187.97	474.726
				7.905	1184.48	466.028
				7.998	1181.62	457.435
				8.091	1178.06	449.797
				8.184	1173.77	442.559
				8.277	1147.87	422.726
				8.37	1141.66	415.432
				8.463	1136	408.856
				8.556	1130.8	403.365
				8.649	1126.34	400.34
				8.742	1121.75	397.712
				8.835	1116.73	395.834
				8.928	1111.42	394.446
				9.021	1106.5	393.614
				9.114	1101.35	392.477
				9.207	1095.81	391.996
				9.3	1088.71	391.806
				9.393	1081.33	392.365
				9.486	1072.31	390.895
				9.579	1029.86	342.734
				9.672	1021.15	341.134
				9.765	988.753	362.791
				9.858	981.141	361.435
				9.951	973.217	360.631
				10.044	964.86	360.334
				10.137	957.158	360.437
				10.23	950.098	356.434
				10.323	942.93	352.968
				10.416	936.709	357.058
				10.509	930.904	356.529
				10.602	924.666	356.62
				10.695	918.409	357.185
				10.788	911.552	358.101
				10.881	904.982	359.392
				10.974	899.123	361.975
				11.067	901.896	366.982
				11.16	893.023	369.566
				11.253	884.466	366.408
				11.346	896.299	355.915
				11.439	888.946	357.463
				11.532	881.776	359.049
				11.625	874.911	360.598
				11.718	868.563	362.384
				11.811	885.33	345.272
				11.904	878.027	346.049
				11.997	871.002	346.995
				12.09	862.639	345.351
				12.183	862.327	341.026
				12.276	853.102	338.582
				12.369	843.877	336.461
				12.462	835.075	334.721
				12.555	846.362	318.166
				12.648	838.105	316.169
				12.741	830.079	314.213
				12.834	822.298	313.361
				12.927	814.63	312.75
				13.02	809.081	311.021
				13.113	804.124	309.127
				13.206	800.206	305.881
				13.299	796.288	302.931
				13.392	791.563	300.14
				13.485	786.016	297.299
				13.578	780.161	294.282
				13.671	774.337	291.463
				13.764	769.362	288.521
				13.857	764.173	286.046
				13.95	762.546	284.27
				14.043	762.04	281.888
				14.136	752.512	279.18
				14.229	742.984	276.744
				14.322	734.552	274.295
				14.415	727.039	272.691
				14.508	719.562	272.251
				14.601	712.041	272.34
				14.694	703.1	272.246
				14.787	694.269	272.468
				14.88	685.482	271.55
				14.973	683.564	272.978
				15.066	675.494	270.842
				15.159	667.424	269.147
				15.252	658.798	267.796
				15.345	648.182	263.437
				15.438	637.46	259.031
				15.531	642.694	244.782
				15.624	632.517	241.205
				15.717	634.477	233.661
				15.81	618.912	232.724
				15.903	608.598	228.928
				15.996	598.109	226.982
				16.089	587.619	225.397
				16.182	576.484	223.603
				16.275	566.068	222.775
				16.368	555.028	221.959
				16.461	543.987	221.453
				16.554	532.784	220.229
				16.647	521.58	219.358
				16.74	526.551	219.109
				16.833	516.063	217.47
				16.926	506	215.181
				17.019	495.936	213.043
				17.112	486.829	211.17
				17.205	477.893	209.553
				17.298	485.882	196.412
				17.391	477.44	194.618
				17.484	468.915	193.457
				17.577	460.39	192.393
				17.67	450.461	189.837
				17.763	440.395	187.216
				17.856	414.1	168.439
				17.949	404.892	164.129
				18.042	395.668	160.052
				18.135	386.522	156.31
				18.228	377.757	153.751
				18.321	368.991	151.558
				18.414	360.444	149.44
				18.507	351.897	147.712
				18.6	345.224	146.976
				18.693	339.079	146.952
				18.786	333.172	146.376
				18.879	327.265	145.968
				18.972	320.989	145.623
				19.065	314.463	145.3
				19.158	307.684	144.466
				19.251	300.904	143.81
				19.344	294.286	143.301
				19.437	287.669	142.967
				19.53	281.151	146.028
				19.623	274.369	145.174
				19.716	268.343	143.496
				19.809	262.316	141.889
				19.902	256.736	140.07
				19.995	251.48	141.738
				20.088	246.85	141.286
				20.181	242.22	140.913
				20.274	246.113	145.379
				20.367	241.883	144.983
				20.46	231.5	155.509
				20.553	235.343	159.593

## Sheet: ANOVA
One -way ANOVA at time 0s
Significance level	α =	0.05
	mean	stdev	N
Steady-state 0.25 M	1223.65	387.378	226
0 min after ΔP=-0.1 M	2114.3	682.429	75
Overall mean	m=	1445.57
Between-group degrees of freedom	dfb=	1
Between-group mean square value	MSb=	4.46701e+07
Within-group degrees of freedom	dfw=	299
Within-group mean square value	MSw=	228182
F-ratio	F=	195.765
Critical value	Fcrit=	3.87275
p-value	p=	0
The difference between steady-state and 0 min after shock is statistically significant
