# Supplementary material for: Rapid adaptation of endocytosis, exocytosis, and eisosomes after an acute increase in membrane tension in yeast cells
Source: eLife. 2021 May 13;10:e62084. doi: 10.7554/eLife.62084 (PMC9045820; doi:10.7554/eLife.62084)
Supplement: Figure 7—source data 6. [file elife-62084-fig7-data6.xlsx]

## Sheet: # molecules
pil1Δ				pil1Δ
Protoplats				Protoplats
Steady state in 0.25 M				ΔP=-0.1 M
				0 min
N=	182			N=	67
Number of molecules (#)				Number of molecules (#)
time	mean	stdev		time	mean	stdev
-5.673	142.19	60.4349		-18.414	155.837	99.527
-5.58	162.259	56.9859		-18.321	159.705	100.061
-5.487	174.899	58.4675		-18.228	165.331	103.407
-5.394	221.457	242.179		-18.135	170.956	106.841
-5.301	226.577	232.211		-18.042	170.207	110.418
-5.208	233.787	220.382		-17.949	173.359	111.382
-5.115	233.734	206.936		-17.856	174.918	113.346
-5.022	241.665	198.387		-17.763	180.717	116.645
-4.929	246.701	188.987		-17.67	240.885	300.204
-4.836	262.181	186.332		-17.577	230.603	284.458
-4.743	270.168	178.554		-17.484	236.124	284
-4.65	275.914	172.194		-17.391	230.127	270.182
-4.557	293.465	174.823		-17.298	237.169	269.348
-4.464	306.623	169.985		-17.205	244.21	268.619
-4.371	323.878	168.218		-17.112	251.252	267.995
-4.278	337.497	165.963		-17.019	258.57	267.299
-4.185	355.631	165.517		-16.926	262.232	262.744
-4.092	374.579	165.119		-16.833	270.217	262.02
-3.999	393.197	163.315		-16.74	278.488	261.779
-3.906	412.897	162.881		-16.647	275.378	255.895
-3.813	434.888	163.21		-16.554	279.844	257.34
-3.72	456.015	162.988		-16.461	285.354	258.623
-3.627	475.639	161.585		-16.368	296.051	262.136
-3.534	496.88	160.562		-16.275	306.748	265.773
-3.441	517.975	159.646		-16.182	317.445	269.529
-3.348	540.355	158.234		-16.089	328.459	273.239
-3.255	564.717	157.964		-15.996	334.776	274.521
-3.162	589.184	158.307		-15.903	346.197	278.281
-3.069	615.268	158.944		-15.81	383.456	317.356
-2.976	639.64	159.372		-15.717	387.187	317.481
-2.883	666.804	161.016		-15.624	398.158	319.138
-2.79	700.202	186.954		-15.531	400.501	315.776
-2.697	724.291	187.256		-15.438	413.464	317.444
-2.604	747.422	188.064		-15.345	426.427	319.281
-2.511	772.477	188.57		-15.252	439.39	321.285
-2.418	796.512	188.93		-15.159	452.373	323.448
-2.325	820.586	190.805		-15.066	465.205	325.798
-2.232	844.355	193.235		-14.973	470.185	322.161
-2.139	868.062	196.561		-14.88	483.296	324.656
-2.046	891.413	200.202		-14.787	496.539	327.471
-1.953	914.056	203.575		-14.694	509.752	329.554
-1.86	935.129	206.627		-14.601	522.431	331.896
-1.767	954.552	210.042		-14.508	535.406	334.147
-1.674	971.802	213.91		-14.415	548.381	336.56
-1.581	988.84	218.582		-14.322	561.356	339.132
-1.488	1004.48	223.59		-14.229	573.994	337.827
-1.395	1021.81	231.853		-14.136	581.083	339.384
-1.302	1034.42	236.78		-14.043	584.862	343.884
-1.209	1046.03	240.883		-13.95	597.812	346.228
-1.116	1056.35	245.162		-13.857	610.759	348.409
-1.023	1065.39	248.407		-13.764	624.226	350.696
-0.93	1074.2	250.83		-13.671	638.311	352.205
-0.837	1081.24	254.258		-13.578	639.936	358.025
-0.744	1087.59	258.033		-13.485	653.335	359.308
-0.651	1092.31	258.889		-13.392	666.734	360.768
-0.558	1096.68	259.719		-13.299	667.862	366.087
-0.465	1100.05	259.772		-13.206	680.621	367.328
-0.372	1102.82	259.753		-13.113	679.028	375.734
-0.279	1102.81	261.039		-13.02	691.46	376.85
-0.186	1105.15	262.031		-12.927	690.889	383.593
-0.093	1112.2	269.245		-12.834	703.063	384.199
0	1119.07	269.653		-12.741	714.389	384.14
0.093	1118.62	269.888		-12.648	711.925	388.016
0.186	1114.41	271.638		-12.555	714.476	386.201
0.279	1106.1	280.118		-12.462	724.353	385.112
0.372	1104.42	280.643		-12.369	734.387	384.332
0.465	1097.56	281.829		-12.276	744.411	383.79
0.558	1095.76	283.337		-12.183	753.791	382.803
0.651	1090.73	283.332		-12.09	763.279	381.976
0.744	1087.31	284.508		-11.997	770.06	379.561
0.837	1084.06	286.572		-11.904	780.784	380.562
0.93	1083.65	285.804		-11.811	791.801	382.217
1.023	1078.87	288.696		-11.718	803.568	383.953
1.116	1076.03	288.475		-11.625	815.699	385.381
1.209	1057.56	296.835		-11.532	827.831	387.116
1.302	1051.28	294.312		-11.439	839.923	389.141
1.395	1049.7	288.413		-11.346	852.036	391.455
1.488	1042.64	285.168		-11.253	864.713	394.113
1.581	1031.28	277.894		-11.16	877.052	396.884
1.674	1024.83	275.488		-11.067	889.217	399.478
1.767	1017.64	271.92		-10.974	900.897	401.652
1.86	1014.74	268.8		-10.881	916.06	405.022
1.953	1009.77	266.207		-10.788	925.735	404.417
2.046	1002.25	263.334		-10.695	935.666	403.751
2.139	976.655	284.786		-10.602	945.784	403.379
2.232	968.348	280.409		-10.509	955.501	403.342
2.325	959.996	275.539		-10.416	965.134	403.786
2.418	944.59	279.416		-10.323	967.7	406.362
2.511	932.264	277.534		-10.23	976.633	407.366
2.604	923.78	273.446		-10.137	986.055	409.72
2.697	915.968	267.705		-10.044	995.312	411.878
2.79	910.466	263.518		-9.951	1004.9	414.577
2.883	901.624	259.777		-9.858	1015.91	417.286
2.976	889.113	254.041		-9.765	1026.89	420.355
3.069	876.596	258.586		-9.672	1037.79	423.716
3.162	868.716	254.8		-9.579	1039.26	437.092
3.255	859.343	252.425		-9.486	1050.69	439.781
3.348	853.838	248.529		-9.393	1062.46	442.152
3.441	846.483	244.98		-9.3	1056.88	457.813
3.534	839.572	242.354		-9.207	1067.99	458.233
3.627	831.997	239.417		-9.114	1064.3	464.01
3.72	820.3	232.41		-9.021	1054.62	480.771
3.813	812.701	229.799		-8.928	1063.57	481.224
3.906	806.865	226.968		-8.835	1072.66	481.881
3.999	798.91	225.653		-8.742	1082.16	483.097
4.092	792.452	223.161		-8.649	1091.67	484.673
4.185	789.619	222.032		-8.556	1115.69	490.964
4.278	781.79	219.804		-8.463	1125.89	493.011
4.371	773.812	217.985		-8.37	1116.02	510.172
4.464	765.862	216.459		-8.277	1126.35	512.987
4.557	758.543	216.967		-8.184	1136.9	515.629
4.65	755.489	216.042		-8.091	1165.83	518.191
4.743	742.832	217.967		-7.998	1176.47	519.398
4.836	735.12	216.276		-7.905	1187.27	520.909
4.929	727.872	214.139		-7.812	1197.65	522.274
5.022	719.764	212.981		-7.719	1208.04	523.962
5.115	712.013	211.123		-7.626	1206	526.544
5.208	704.558	210.345		-7.533	1198.08	536.809
5.301	692.652	206.293		-7.44	1207.92	538.535
5.394	684.323	204.759		-7.347	1217.9	538.824
5.487	677.009	203.448		-7.254	1225.38	544.433
5.58	668.572	201.97		-7.161	1236.36	544.846
5.673	660.19	199.477		-7.068	1247.55	544.989
5.766	653.715	197.547		-6.975	1258.6	545.481
5.859	646.13	196.559		-6.882	1269.77	546.667
5.952	634.386	194.656		-6.789	1280.95	548.34
6.045	622.643	191.943		-6.696	1307.65	546.608
6.138	613.864	190.124		-6.603	1319.99	548.999
6.231	605.266	188.268		-6.51	1331.84	551.689
6.324	598.859	187.768		-6.417	1343.12	555.648
6.417	592.788	188.385		-6.324	1354.19	558.79
6.51	586.675	188.357		-6.231	1364.01	561.13
6.603	579.086	187.724		-6.138	1374.02	564.721
6.696	571.701	187.019		-6.045	1379.61	563.784
6.789	564.468	187.359		-5.952	1389.69	567.315
6.882	557.472	185.416		-5.859	1399.76	571.151
6.975	550.033	183.291		-5.766	1409.55	574.526
7.068	542.417	181.486		-5.673	1419.51	578.136
7.161	536.007	180.872		-5.58	1428.49	588.852
7.254	528.147	179.912		-5.487	1439.56	594.011
7.347	520.187	178.95		-5.394	1450.5	599.851
7.44	511.328	175.134		-5.301	1503	600.737
7.533	503.02	174.074		-5.208	1515.98	606.418
7.626	498.376	169.722		-5.115	1528.52	612.551
7.719	491.136	169.772		-5.022	1541.26	618.362
7.812	482.276	169.029		-4.929	1554	624.539
7.905	478.956	168.75		-4.836	1566.48	631.118
7.998	470.741	168.213		-4.743	1587.63	642.44
8.091	462.126	167.348		-4.65	1599.9	646.301
8.184	453.881	166.507		-4.557	1611.27	650.748
8.277	446	166.6		-4.464	1623.23	655.092
8.37	433.411	160.455		-4.371	1628.15	663.325
8.463	427.31	160.684		-4.278	1638.4	665.567
8.556	420.273	160.514		-4.185	1648.68	668.1
8.649	410.95	159.99		-4.092	1659.4	672.178
8.742	407.189	156.71		-3.999	1670.12	676.676
8.835	397.948	155.731		-3.906	1681.09	681.356
8.928	394.048	153.238		-3.813	1691.62	686.507
9.021	390.578	151.327		-3.72	1702.5	693.143
9.114	388.349	150.209		-3.627	1713.94	699.747
9.207	384.336	149.216		-3.534	1722.57	703.993
9.3	382.196	145.313		-3.441	1730.9	709.888
9.393	382.553	140.912		-3.348	1739.01	715.275
9.486	375.207	143.232		-3.255	1746.36	720.837
9.579	374.485	140.546		-3.162	1753.31	726.362
9.672	367.43	140.637		-3.069	1760.26	732.148
9.765	359.621	142.035		-2.976	1767.5	737.938
9.858	352.039	142.507		-2.883	1775.28	743.954
9.951	343.999	142.663		-2.79	1783.22	751.969
10.044	349.562	138.246		-2.697	1791.21	760.374
10.137	341.825	137.837		-2.604	1799.09	769.924
10.23	339.314	136.78		-2.511	1831.66	773.177
10.323	334.313	137.239		-2.418	1839.21	782.733
10.416	325.134	131.395		-2.325	1847.34	792.53
10.509	318.14	131.193		-2.232	1897.15	838.637
10.602	315.115	130.924		-2.139	1904.96	847.113
10.695	310.635	131.984		-2.046	1911.3	855.25
10.788	304.976	132.144		-1.953	1917.53	863.643
10.881	298.021	133.478		-1.86	1922.33	869.133
10.974	295.645	133.749		-1.767	2017.64	860.657
11.067	296.527	134.335		-1.674	2021.78	862.891
11.16	295.331	136.012		-1.581	2067.76	849.215
11.253	289.513	136.705		-1.488	2070.25	849.64
11.346	289.982	137.371		-1.395	2072.67	850.46
11.439	288.187	137.664		-1.302	2074.58	851.053
11.532	289.211	136.792		-1.209	2075.94	850.93
11.625	305.349	131.611		-1.116	2077.68	851.508
11.718	299.015	131.44		-1.023	2079.1	852.195
11.811	288.489	131.051		-0.93	2080.91	853.146
11.904	281.972	130.899		-0.837	2082.91	854.503
11.997	271.872	131.063		-0.744	2086.22	856.465
12.09	268.675	130.113		-0.651	2090.59	861.192
12.183	281.993	122.98		-0.558	2095.86	866.816
12.276	275.359	121.193		-0.465	2099.82	872.023
12.369	276.754	120.25		-0.372	2103.17	877.181
12.462	271.702	119.666		-0.279	2107.86	884.042
12.555	265.198	116.962		-0.186	2112.18	891.543
12.648	272.125	114.369		-0.093	2116.06	898.978
12.741	265.374	111.817		0	2117.87	905.787
12.834	265.16	108.027		0.093	2054.72	940.863
12.927	258.737	105.917		0.186	2055.28	947.587
13.02	256.215	105.83		0.279	2053.54	949.055
13.113	250.566	104.044		0.372	2050.45	949.569
13.206	252.666	99.6545		0.465	2047.26	950.428
13.299	247.229	97.9089		0.558	2042.28	948.416
13.392	253.489	98.8146		0.651	2037.21	946.466
13.485	249.481	98.5902		0.744	2032.14	944.401
13.578	245.473	98.4992		0.837	2025.81	941.789
13.671	241.465	98.5419		0.93	2020.34	938.147
13.764	237.697	98.508		1.023	2014.64	935.129
13.857	233.824	98.4835		1.116	2008.12	930.756
13.95	227.432	101.413		1.209	2002.25	929.353
14.043	223.156	101.629		1.302	1995.56	927.557
14.136	218.879	102.009		1.395	1988.84	925.74
14.229	228.484	103.17		1.488	1983.24	924.995
				1.581	1976.63	923.075
				1.674	1968.32	919.519
				1.767	1961.05	916.32
				1.86	1953.48	914.583
				1.953	1890.2	935.669
				2.046	1868.74	929.021
				2.139	1865.04	927.74
				2.232	1861.58	926.47
				2.325	1857.57	925.494
				2.418	1854.32	926.202
				2.511	1851.77	927.94
				2.604	1844.59	942.131
				2.697	1843.76	946.41
				2.79	1842.66	949.843
				2.883	1839.76	953.846
				2.976	1836.2	956.184
				3.069	1851.62	959.025
				3.162	1846.59	959.364
				3.255	1847.98	970.574
				3.348	1843.82	969.749
				3.441	1834.45	957.417
				3.534	1829.16	954.37
				3.627	1822.81	951.284
				3.72	1818.4	959.35
				3.813	1770.63	979.018
				3.906	1765.71	975.908
				3.999	1761.46	974.684
				4.092	1757.82	973.063
				4.185	1753.12	972.032
				4.278	1747.93	969.929
				4.371	1742.09	967.465
				4.464	1739.87	952.609
				4.557	1697.3	968.814
				4.65	1693.2	966.112
				4.743	1689.35	963.118
				4.836	1681.4	948.746
				4.929	1711.99	924.527
				5.022	1705.77	920.864
				5.115	1700.22	917.101
				5.208	1694.36	913.895
				5.301	1688.54	910.998
				5.394	1684.19	908.345
				5.487	1678.72	905.856
				5.58	1673.08	902.888
				5.673	1675.1	909.684
				5.766	1669.95	907.836
				5.859	1661.23	902.615
				5.952	1652.15	897.572
				6.045	1642.67	892.937
				6.138	1633.47	888.351
				6.231	1624.54	884.031
				6.324	1612.62	879.153
				6.417	1601.56	874.349
				6.51	1589.54	869.251
				6.603	1578.37	863.608
				6.696	1567.05	858.624
				6.789	1554.97	852.735
				6.882	1543.35	847.074
				6.975	1532.18	841.323
				7.068	1469.13	775.762
				7.161	1458.18	770.057
				7.254	1449.29	765.656
				7.347	1439.4	761.144
				7.44	1430.17	757.135
				7.533	1410.51	737.443
				7.626	1400.47	734.909
				7.719	1365.97	720.132
				7.812	1354.43	712.547
				7.905	1342.14	705.572
				7.998	1330.15	698.84
				8.091	1318.53	692.366
				8.184	1306.41	685.487
				8.277	1294.09	678.611
				8.37	1281.99	672.98
				8.463	1269.73	667.333
				8.556	1256.9	659.993
				8.649	1212.95	629.054
				8.742	1193.33	612.316
				8.835	1180.57	601.622
				8.928	1167.24	591.005
				9.021	1154.11	580.599
				9.114	1141.28	570.235
				9.207	1129.24	559.727
				9.3	1116.13	547.449
				9.393	1103.74	535.115
				9.486	1091.55	524.89
				9.579	1096.76	520.131
				9.672	1086.57	517.053
				9.765	1087.74	514.941
				9.858	1077.25	512.437
				9.951	1066.19	510.215
				10.044	1054.12	507.5
				10.137	1040.93	505.231
				10.23	1027.94	504.32
				10.323	1014.09	503.958
				10.416	1000.11	500.52
				10.509	984.772	495.051
				10.602	969.954	489.724
				10.695	955.885	484.525
				10.788	941.815	479.613
				10.881	928.025	474.908
				10.974	922.611	474.986
				11.067	910.718	471.207
				11.16	898.721	467.697
				11.253	886.897	464.547
				11.346	876.087	469.924
				11.439	864.728	461.45
				11.532	862.926	462.488
				11.625	852.244	460.024
				11.718	841.426	457.744
				11.811	831.322	455.382
				11.904	826.017	457.786
				11.997	815.214	455.06
				12.09	804.319	452.125
				12.183	793.412	449.322
				12.276	782.964	444.591
				12.369	780.08	448.366
				12.462	769.267	454.514
				12.555	760.016	454.458
				12.648	745.259	460.027
				12.741	734.897	460.308
				12.834	724.067	460.161
				12.927	714.84	459.172
				13.02	705.988	458.752
				13.113	697.387	458.222
				13.206	688.089	458.015
				13.299	678.313	455.265
				13.392	668.707	452.292
				13.485	658.978	449.443
				13.578	649.249	446.742
				13.671	646.349	449.108
				13.764	646.143	450.986
				13.857	636.323	449.037
				13.95	626.647	446.463
				14.043	617.355	443.671
				14.136	608.468	440.346
				14.229	552.891	312.381
				14.322	543.984	309.364
				14.415	534.556	306.225
				14.508	525.128	303.235
				14.601	515.7	300.398
				14.694	513.481	309.578
				14.787	514.701	308.416
				14.88	506.293	306.074
				14.973	498.259	303.724
				15.066	464.633	275.707
				15.159	450.485	275.129
				15.252	433.549	272.562
				15.345	427.319	268.814
				15.438	421.089	265.126
				15.531	414.858	261.5
				15.624	408.628	257.939
				15.717	402.398	254.445
				15.81	396.38	250.999
				15.903	418.946	239.458
				15.996	411.149	236.15
				16.089	337.775	154.143
				16.182	330.305	152.86
				16.275	322.725	151.645
				16.368	315.146	150.537
				16.461	307.567	149.541
				16.554	299.988	148.657
				16.647	292.409	147.888
				16.74	285.09	147.734
				16.833	278.336	147.834
				16.926	273.377	147.953
				17.019	268.639	148.162
				17.112	263.901	148.452
				17.205	259.513	148.761
				17.298	255.124	149.125
				17.391	250.736	149.542
				17.484	246.347	150.014
				17.577	241.959	150.538
				17.67	238.196	151.654
				17.763	234.46	152.773
				17.856	239.042	153.315
				17.949	235.029	153.865
				18.042	234.821	158.45
				18.135	231.01	159.047
				18.228	227.2	159.696
				18.321	223.39	160.395
				18.414	219.579	161.144
				18.507	229.204	168.795
				18.6	224.722	168.441
				18.693	216.005	178.429

## Sheet: ANOVA
One -way ANOVA at time 0s
Significance level	α =	0.05
	mean	stdev	N
Steady-state 0.25 M	1119.07	269.653	182
0 min after ΔP=-0.1 M	2117.87	905.787	67
Overall mean	m=	1387.82
Between-group degrees of freedom	dfb=	1
Between-group mean square value	MSb=	4.88538e+07
Within-group degrees of freedom	dfw=	247
Within-group mean square value	MSw=	272513
F-ratio	F=	179.272
Critical value	Fcrit=	3.87938
p-value	p=	0
The difference between steady-state and 0 min after shock is statistically significant
