# Supplementary material for: Rapid adaptation of endocytosis, exocytosis, and eisosomes after an acute increase in membrane tension in yeast cells
Source: eLife. 2021 May 13;10:e62084. doi: 10.7554/eLife.62084 (PMC9045820; doi:10.7554/eLife.62084)
Supplement: Supplementary file 1. — (a) Figure 3A and Figure 3B. (b) Figure 3C. (c) Figure 3D. (d) Figure 6C and Figure 6—figure supplement 2A. (e) Figure 6D. (f) Figure 6E. (g) Figure 6G. (h) Figure 6H. (i) Figure 7C and Figure 7F. (j) Figure 7D and Figure 7G. (k) Figure 7H and Figure 7I. (l) Figure 7—figure supplement 1B and Figure 7—figure supplement 1C. [file elife-62084-supp1.xlsx]

## Sheet: a
Number of cells used to generate Figures 3A and 3B
ΔC=-0.025M
Time point	Number of cells	Number of cells
	WT cells	pil1Δ cells
Steady state in 0.4M	N/A	99
0 min after ΔC=-0.025 M	N/A	100
2 min after ΔC=-0.025 M	N/A	71
4 min after ΔC=-0.025 M	N/A	70
6 min after ΔC=-0.025 M	N/A	98
8 min after ΔC=-0.025 M	N/A	118
10 min after ΔC=-0.025 M	N/A	96
ΔC=-0.05M
Time point	Number of cells	Number of cells
	WT cells	pil1Δ cells
Steady state in 0.4M	172	263
0 min after ΔC=-0.05 M	102	106
2 min after ΔC=-0.05 M	117	111
4 min after ΔC=-0.05 M	114	106
6 min after ΔC=-0.05 M	113	103
8 min after ΔC=-0.05 M	124	123
10 min after ΔC=-0.05 M	N/A	104
ΔC=-0.1M
Time point	Number of cells	Number of cells
	WT cells	pil1Δ cells
Steady state 0.4M	127	151
0 min after ΔC=-0.1 M	62	125
2 min after ΔC=-0.1 M	70	78
4 min after ΔC=-0.1 M	78	N/A
6 min after ΔC=-0.1 M	62	N/A
8 min after ΔC=-0.1 M	54	N/A
ΔC=-0.2M
Time point	Number of cells	Number of cells
	WT cells	pil1Δ cells
Steady state 0.4M	146	N/A
0 min after ΔC=-0.2 M	149	N/A
2 min after ΔC=-0.2 M	158	N/A
4 min after ΔC=-0.2 M	83	N/A
6 min after ΔC=-0.2 M	107	N/A
8 min after ΔC=-0.2 M	83	N/A

## Sheet: b
Number of cells used to generate Figure 3C
Sorbitol Concentration	Number of cells	Number of cells
	WT cells	pil1Δ cells
Steady state in 0 M	240	188
Steady state in 0.8 M	103	105
Steady state in 1.2 M	159	183
Steady state in 2 M	161	80

## Sheet: c
Number of cells used to generate Figure 3D
Time point	Number of cells	Number of cells
	WT cells	pil1Δ cells
Steady state 1.2M	62	119
0 min after ΔC=-1.2 M	82	69
2 min after ΔC=-1.2 M	77	44
4 min after ΔC=-1.2 M	67	67
6 min after ΔC=-1.2 M	66	N/A

## Sheet: d
Number of endocytic events used to generate Figures 6C and 6 – Supplement 2A
Field of view	Number of tracks
Field 1	64
Field 2	79
Field 3	91
Field 4	202

## Sheet: e
Number of endocytic events used to generate Figure 6D
Sorbitol concentration	Number of tracks
0 M	388
0.8 M	454
1.2 M	451

## Sheet: f
Number of endocytic events used to generate Figure 6E
Sorbitol concentration	Number of tracks
0 M	342
0.8 M	516
1.2 M	514

## Sheet: g
Number of endocytic events used to generate Figure 6G
Time point	Number of tracks
Steady state	354
0 min	103
2 min	169
4 min	190
6 min	153

## Sheet: h
Number of endocytic events used to generate Figure 6H
Time point	Number of tracks
Steady state	583
0 min	176
2 min	145
4 min	326

## Sheet: i
Number of endocytic events used to generate Figures 7C and 7F
ΔC=-0.05M
Time point	Number of tracks	Number of tracks
	WT cells	pil1Δ cells
Steady state in 0.4M	279	429
0 min after ΔC=-0.05M	193	183
10 min after ΔC=-0.05M	182	206
ΔC=-0.1M
Time point	Number of tracks	Number of tracks
	WT cells	pil1Δ cells
Steady state in 0.4M	413	95
0 min after ΔC=-0.1M	190	215
10 min after ΔC=-0.1M	186	N/A
ΔC=-0.2M
Time point	Number of tracks	Number of tracks
	WT cells	pil1Δ cells
Steady state in 0.4M	269	95
0 min after ΔC=-0.2M	396	373
10 min after ΔC=-0.2M	309	N/A

## Sheet: j
Number of endocytic events used to generate Figures 7D and N7G
Time point	Number of tracks
	WT cells
Steady state in 0.4M	269
0 min after ΔC=-0.2M	396
2 min after ΔC=-0.2M	124
4 min after ΔC=-0.2M	127
6 min after ΔC=-0.2M	178
8 min after ΔC=-0.2M	255
10 min after ΔC=-0.2M	309
Time point	Number of tracks
	pil1Δ cells
Steady state in 0.4M	429
0 min after ΔC=-0.05M	183
2 min after ΔC=-0.05M	188
4 min after ΔC=-0.05M	162
6 min after ΔC=-0.05M	193
8 min after ΔC=-0.05M	197
10 min after ΔC=-0.05M	206

[truncated: 2 more sheets: k, l]
